# Supplementary material
Source: Research Square preprint supplement (doi:10.21203/rs.3.rs-8727447/v1)
Supplement: Supplementary file 2 [file be29c2166b6fabda940effcc.xlsx]

## Sheet: Sheet1
Table S1. Dataset information. Related to Figure 1.
ID	Mutaion	Patient ID	Cell number	Dataset	Pubmed ID	Lung type	Stage	Gender	Age
P1	EGFR	P1	3381	GSE171145	35140113	LUAD	IIIA	M	60
P2	EGFR	P6	5022	GSE171145	35140113	LUAD	IA3	F	53
P3	EGFR	P8	4834	GSE171145	35140113	LUAD	IA3	M	68
P4	EGFR	p08	3765	GSE131907	32385277	LUAD	IB	F	60
P5	EGFR	p18	3705	GSE131907	32385277	LUAD	IA	M	62
P6	EGFR	p19	4361	GSE131907	32385277	LUAD	IA	M	53
P7	EGFR	p30	4094	GSE131907	32385277	LUAD	IA	M	58
P8	EGFR	PA18	2282	PMID：35027529	35027529	LUAD	IV	F	38
P9	EGFR	PS05	9896	PMID：35027529	35027529	LUSC	IIB	M	51
P10	EGFR	PS11	1653	PMID：35027529	35027529	LUSC	IIIB	M	62
P11	EGFR	P37	2486	GSE148071	33953163	LUSC	III/IV	F	73
P12	EGFR-BM	LC01	5484	GSE202371	36336787	LUAD	IV	F	51
P13	EGFR-BM	LC02	5159	GSE202371	36336787	LUAD	IV	F	70
P14	EGFR-BM	LC04	5497	GSE202371	36336787	LUAD	IV	M	66
P15	EGFR-BM	LC05	4269	GSE202371	36336787	LUAD	IV	F	44
P16	EGFR-BM	LC06	4649	GSE202371	36336787	LUAD	IV	F	46
P17	EGFR-BM	LC07	4916	GSE202371	36336787	LUAD	IV	F	52
P18	EGFR-BM	LC08	4835	GSE202371	36336787	LUAD	IV	F	61
P19	EGFR-BM	p03	2990	GSE131907	32385277	LUAD	IV	F	81
P20	EGFR-BM	p12	3182	GSE131907	32385277	LUAD	IV	F	59
P21	EGFR-BM	p13	4845	GSE131907	32385277	LUAD	IV	F	50
P22	EGFR-co-mutation	P3	1007	GSE171145	35140113	LUAD	IIB	F	72
P23	EGFR-co-mutation	P4	5241	GSE171145	35140113	LUAD	IIB	F	72
P24	KRAS	P018	14759	CO.0121060.V1	34663877	acinar LUAD	pt1a pN0 IA	F	58
P25	KRAS	P030	4823	CO.0121060.V1	34663877	mucinuous LUAD	pt4 pN0 IV	M	63
P26	KRAS	P032	11793	CO.0121060.V1	34663877	lepidic LUAD	pt2 pN0 II	F	83
P27	KRAS	P033	5164	CO.0121060.V1	34663877	papillary LUAD	pt3 pN0 IIB	F	64
P28	KRAS	NSC016	5701	GSE136246	33854168	LUAD	pT1bN0Mx IA	F	61
P29	KRAS	NSC018	15879	GSE136246	33854168	LUAD	pT3N0M1a IIB	M	83
P30	KRAS	NSC019	5729	GSE136246	33854168	LUAD	pT1bNxMx IA	F	72
P31	KRAS	NSC020	7219	GSE136246	33854168	LUAD	pT3N1Mx IIIA	M	76
P32	KRAS	NSC021	11194	GSE136246	33854168	LUAD	pT3N1Mx IIIA	F	63
P33	KRAS	NSC035	3283	GSE136246	33854168	LUAD	pT1cN0 IA3	M	73
P34	KRAS	NSC036	1585	GSE136246	33854168	LUAD	pT1cN0 IA3	F	80
P35	KRAS	NSC040	1811	GSE136246	33854168	LUAD	pT1bN2 IIIA	F	56
P36	KRAS-co-mutation(TP53)	P023	7809	CO.0121060.V1	34663877	solid LUAD	pt1c pN0 IA3	F	62
P37	KRAS-co-mutation(PIK3CA)	P031	5931	CO.0121060.V1	34663877	acinar LUAD	pt2 pN0 IIA	M	77
P38	KRAS-co-mutation(PBRM1,TP53,STK11,KEAP1)	P2	4783	GSE171145	35140113	LUAD	IVB	M	57
P39	ALK	P024	6657	CO.0121060.V1	34663877	acinar LUAD	pt1b pN0 IA2	F	63
P40	ROS1	PA03	9960	PMID：35027529	35027529	LUAD	IA	F	55
P41	ROS1	PA05	2385	PMID：35027529	35027529	LUAD	IA	F	61
P42	ROS1	PA07	4938	PMID：35027529	35027529	LUAD	IB	M	61
P43	TP53	P027	9264	CO.0121060.V1	34663877	solid LUAD	pt2a pN0 IB	M	49
P44	MET-BM	LC09	4317	GSE202371	36336787	LUAD	IV	M	58
P45	HER2	P6	3119	GSE148071	33953163	LUSC	III/IV	M	59

## Sheet: Sheet2
Table S2. Top 10 marker genes of immune cell and stromal cell subsets. Related to Figure 1.
	p_val	avg_log2FC	pct.1	pct.2	p_val_adj	cluster	gene
1	0	1.96623273530574	0.685	0.292	0	CD4T_01_IL7R	IL7R
2	0	1.60070796855607	0.582	0.274	0	CD4T_01_IL7R	LTB
3	0	2.14209155474107	0.287	0.096	0	CD4T_01_IL7R	CCR7
4	0	1.86036830648206	0.308	0.123	0	CD4T_01_IL7R	BCL11B
5	0	1.8091739603208	0.308	0.127	0	CD4T_01_IL7R	KLRB1
6	0	1.63708283452597	0.479	0.308	0	CD4T_01_IL7R	RPL17
7	0	1.71227551471268	0.402	0.268	0	CD4T_01_IL7R	TTC19
8	0	1.53335216490459	0.284	0.156	0	CD4T_01_IL7R	RPS4Y1
9	0	1.53499504706713	0.252	0.13	0	CD4T_01_IL7R	EEF1G
10	0	1.49656772906829	0.34	0.229	0	CD4T_01_IL7R	NBEAL1
11	0	5.72581807117654	0.671	0.025	0	CD8T_03_MKI67	MKI67
12	0	5.41017586948132	0.666	0.031	0	CD8T_03_MKI67	TYMS
13	0	5.58433067546197	0.658	0.026	0	CD8T_03_MKI67	PCLAF
14	0	5.61415361223989	0.513	0.017	0	CD8T_03_MKI67	UBE2C
15	0	5.62791938368963	0.502	0.016	0	CD8T_03_MKI67	RRM2
16	0	6.17630491461025	0.488	0.013	0	CD8T_03_MKI67	ASPM
17	0	5.89489371550954	0.345	0.008	0	CD8T_03_MKI67	DLGAP5
18	0	5.54251488267092	0.317	0.009	0	CD8T_03_MKI67	CDCA8
19	0	5.4079061491197	0.309	0.009	0	CD8T_03_MKI67	CDCA5
20	0	5.83833778204329	0.282	0.007	0	CD8T_03_MKI67	KIF15
21	0	2.33590427449533	0.884	0.28	0	CD8T_01_CCL5	CCL5
22	0	2.12187474515108	0.681	0.163	0	CD8T_01_CCL5	GZMA
23	0	3.20520012721788	0.52	0.082	0	CD8T_01_CCL5	CD8A
24	0	2.29128495352338	0.597	0.187	0	CD8T_01_CCL5	CST7
25	0	3.32537	0.411	0.06	0	CD8T_01_CCL5	GZMK
26	0	3.07334067896634	0.313	0.048	0	CD8T_01_CCL5	CD8B
27	0	2.27038371333765	0.334	0.074	0	CD8T_01_CCL5	GZMH
28	0	2.1513565791829	0.284	0.082	0	CD8T_01_CCL5	GZMM
29	0	2.41034421442848	0.262	0.062	0	CD8T_01_CCL5	TRGC2
30	0	2.17086009329544	0.274	0.08	0	CD8T_01_CCL5	SH2D1A
31	0	3.04806976736705	0.582	0.132	0	CD4T_04_SNORD3A	AP001324.1
32	0	2.86021853644282	0.576	0.146	0	CD4T_04_SNORD3A	RPS27AP16
33	0	2.85327521668934	0.542	0.123	0	CD4T_04_SNORD3A	RPL34P18
34	0	2.81084001337021	0.547	0.132	0	CD4T_04_SNORD3A	RPL13AP5
35	0	2.81358266768309	0.493	0.111	0	CD4T_04_SNORD3A	EEF1A1P5
36	0	2.89186881685739	0.475	0.112	0	CD4T_04_SNORD3A	RPS3AP6
37	0	2.98776494538256	0.333	0.069	0	CD4T_04_SNORD3A	RPS3AP26
38	0	2.83730899859951	0.298	0.069	0	CD4T_04_SNORD3A	RPL13P12
39	0	3.24217813867027	0.26	0.043	0	CD4T_04_SNORD3A	RPS18P12
40	0	2.80640035443263	0.252	0.058	0	CD4T_04_SNORD3A	RPS2P5
41	0	2.16636595798074	0.367	0.093	0	CD4T_02_GNB2L1	GNB2L1
42	0	1.1696558488402	0.561	0.293	0	CD4T_02_GNB2L1	LTB
43	0	2.47420691069553	0.32	0.076	0	CD4T_02_GNB2L1	GLTSCR2
44	0	1.17744724917594	0.692	0.569	0	CD4T_02_GNB2L1	RPS10
45	0	1.1361379449158	0.792	0.671	0	CD4T_02_GNB2L1	RPL21
46	0	1.16485119051471	0.783	0.664	0	CD4T_02_GNB2L1	RPL23A
47	0	1.14328352898988	0.667	0.59	0	CD4T_02_GNB2L1	RPS17
48	0	1.14519728177109	0.871	0.826	0	CD4T_02_GNB2L1	RPL13A
49	1.59018345906215e-288	1.23555873011954	0.592	0.514	7.53126788046423e-284	CD4T_02_GNB2L1	RPS26
50	4.76654617832938e-215	1.34297144059991	0.265	0.14	2.25748393551858e-210	CD4T_02_GNB2L1	KLRB1
51	0	4.39281955401717	0.562	0.052	0	Treg_FOXP3	TNFRSF18
52	0	3.14327296134921	0.598	0.094	0	Treg_FOXP3	TIGIT
53	0	3.77943546300922	0.535	0.061	0	Treg_FOXP3	CTLA4
54	0	5.11754138985699	0.515	0.046	0	Treg_FOXP3	TNFRSF4
55	0	3.17325823739649	0.492	0.101	0	Treg_FOXP3	BATF
56	0	5.04874201200363	0.378	0.015	0	Treg_FOXP3	FOXP3
57	0	4.02349944338944	0.402	0.06	0	Treg_FOXP3	IL2RA
58	0	3.13188755350814	0.432	0.09	0	Treg_FOXP3	TBC1D4
59	0	3.96413181243777	0.268	0.029	0	Treg_FOXP3	LINC01943
60	0	3.05244882002779	0.259	0.044	0	Treg_FOXP3	IKZF2
61	0	5.41071020574264	0.687	0.143	0	CD4T_03_SCGB3A1	SCGB3A1
62	0	2.98411921310135	0.605	0.106	0	CD4T_03_SCGB3A1	SCGB3A2
63	0	3.36248774320999	0.397	0.078	0	CD4T_03_SCGB3A1	NAPSA
64	0	3.41147993814582	0.381	0.067	0	CD4T_03_SCGB3A1	SCGB1A1
65	0	2.84089301277674	0.414	0.125	0	CD4T_03_SCGB3A1	AC058791.1
66	0	2.8735703005429	0.286	0.065	0	CD4T_03_SCGB3A1	SLPI
67	0	3.91090617355413	0.253	0.04	0	CD4T_03_SCGB3A1	SFTA2
68	0	2.4450628471633	0.376	0.17	0	CD4T_03_SCGB3A1	ANKRD28
69	0	2.81700115107461	0.263	0.064	0	CD4T_03_SCGB3A1	PIGR
70	0	2.30546304409894	0.252	0.083	0	CD4T_03_SCGB3A1	TENT5C
71	0	4.37330635461194	0.948	0.154	0	NK_01_FGFBP2	NKG7
72	0	4.03418527309682	0.838	0.09	0	NK_01_FGFBP2	GNLY
73	0	4.56721335858747	0.821	0.078	0	NK_01_FGFBP2	PRF1
74	0	8.10013090102698	0.713	0.007	0	NK_01_FGFBP2	FGFBP2
75	0	4.06039489004216	0.775	0.072	0	NK_01_FGFBP2	KLRD1
76	0	3.93897529698928	0.692	0.076	0	NK_01_FGFBP2	GZMH
77	0	5.99838235101982	0.493	0.011	0	NK_01_FGFBP2	KLRF1
78	0	4.89137622304033	0.495	0.038	0	NK_01_FGFBP2	SPON2
79	0	5.34569334185092	0.329	0.015	0	NK_01_FGFBP2	S1PR5
80	0	4.43291368237923	0.277	0.014	0	NK_01_FGFBP2	FCRL6
81	0	3.19287454439823	0.747	0.139	0	CD4T_05_SFTPB	SFTPB
82	0	2.35511652642108	0.701	0.189	0	CD4T_05_SFTPB	RPL39P3
83	0	3.05258115231312	0.566	0.082	0	CD4T_05_SFTPB	SFTPA2
84	0	2.50851155819917	0.509	0.127	0	CD4T_05_SFTPB	RPL34P18
85	0	2.90655228720012	0.425	0.072	0	CD4T_05_SFTPB	SFTPA1
86	0	2.93827686536554	0.345	0.071	0	CD4T_05_SFTPB	HSP90AA2P
87	0	2.89197623200925	0.313	0.096	0	CD4T_05_SFTPB	SFTPC
88	0	2.39587731120042	0.274	0.066	0	CD4T_05_SFTPB	RPS15AP24
89	0	2.47967422749015	0.275	0.067	0	CD4T_05_SFTPB	RPL23P8
90	0	2.32270046898014	0.275	0.076	0	CD4T_05_SFTPB	Z74021.1
91	0	8.1691370318396	0.79	0.086	0	CD4T_06_ACSL5	ACSL5
92	0	7.97535420338014	0.678	0.039	0	CD4T_06_ACSL5	AC026403.1
93	0	8.6008372951831	0.539	0.013	0	CD4T_06_ACSL5	AC107075.1
94	0	8.73235394467164	0.482	0.012	0	CD4T_06_ACSL5	AL020997.1
95	0	10.1215943977573	0.45	0.002	0	CD4T_06_ACSL5	AC046195.1
96	0	12.1694236247182	0.44	0.001	0	CD4T_06_ACSL5	AC093840.1
97	0	7.99696462790865	0.415	0.016	0	CD4T_06_ACSL5	AC034102.1
98	0	9.18266132570931	0.372	0.005	0	CD4T_06_ACSL5	AC079630.1
99	0	7.99839202514716	0.333	0.008	0	CD4T_06_ACSL5	AC021074.1
100	0	8.1386777337698	0.285	0.006	0	CD4T_06_ACSL5	AL136126.1
101	0	3.83669452468362	0.737	0.076	0	CD8T_02_GZMB	GZMB
102	0	3.42812756827017	0.805	0.163	0	CD8T_02_GZMB	GZMA
103	0	3.29288233411506	0.563	0.064	0	CD8T_02_GZMB	KLRD1
104	0	4.15688361327707	0.546	0.084	0	CD8T_02_GZMB	GNLY
105	0	3.35469	0.371	0.048	0	CD8T_02_GZMB	LAG3
106	0	5.00992919243604	0.317	0.014	0	CD8T_02_GZMB	KLRC2
107	0	4.51597196522292	0.268	0.016	0	CD8T_02_GZMB	KLRC1
108	0	3.19051381948027	0.303	0.055	0	CD8T_02_GZMB	CRTAM
109	0	5.19408698431791	0.259	0.011	0	CD8T_02_GZMB	KRT86
110	0	3.38265975242245	0.272	0.026	0	CD8T_02_GZMB	ZNF683
111	3.67854232940588e-227	2.40332623179746	0.754	0.341	1.74219443262992e-222	CD8T_04_HLA-B	MT-ND6
112	1.03637182563307e-81	3.4369355842118	0.283	0.099	4.9083606033808e-77	CD8T_04_HLA-B	RPL34P27
113	6.78750000042047e-56	2.4490398442756	0.359	0.182	3.21462787519914e-51	CD8T_04_HLA-B	RPL6P27
114	1.13934289232426e-51	2.73716103438525	0.266	0.113	5.39604187233692e-47	CD8T_04_HLA-B	FAM46C
115	1.55262490002981e-48	2.73169663015137	0.294	0.141	7.35338678903119e-44	CD8T_04_HLA-B	BCL11B
116	6.09326684533939e-46	2.77715477339575	0.405	0.264	2.88583211062119e-41	CD8T_04_HLA-B	CNOT6L
117	7.75316272680747e-43	3.19934051485402	0.265	0.128	3.67197539904329e-38	CD8T_04_HLA-B	PDE4D
118	5.95902458491624e-39	2.39166291665839	0.361	0.221	2.82225363366218e-34	CD8T_04_HLA-B	ITM2A
119	3.2818255846731e-29	2.44172898019342	0.342	0.232	1.55430541515703e-24	CD8T_04_HLA-B	CCND2
120	1.15465642978794e-08	2.33464992344205	0.262	0.223	0.000546856831711864	CD8T_04_HLA-B	RNF19A
121	0	2.01660415287556	0.46	0.159	0	B_03_CD3E	HLA.A
122	1.47278184793254e-299	1.98225253178049	0.436	0.143	6.97524210999328e-295	B_03_CD3E	HLA.C
123	8.48742724878708e-294	1.8802056722927	0.435	0.144	4.01973041929805e-289	B_03_CD3E	HLA.E
124	7.38988920618614e-286	1.96708004866177	0.472	0.177	3.49992542694182e-281	B_03_CD3E	HLA.B
125	1.58058907268506e-253	1.91329300959242	0.298	0.08	7.48582790714372e-249	B_03_CD3E	AC093525.2
126	3.75164729905381e-245	1.88425725144807	0.302	0.084	1.77681767730487e-240	B_03_CD3E	ATP6V0C
127	1.08481136181978e-197	1.5765129696892	0.381	0.14	5.13777509071465e-193	B_03_CD3E	Metazoa-SRP
128	2.74559484549086e-196	1.58493504961221	0.468	0.206	1.30034117477292e-191	B_03_CD3E	MTRNR2L8
129	1.54158752978943e-122	1.69237208119054	0.451	0.25	7.30111269983571e-118	B_03_CD3E	DUSP4
130	2.79019179737087e-114	1.46181552239534	0.455	0.259	1.32146273715282e-109	B_03_CD3E	FYN
131	0	4.41501932501175	0.836	0.042	0	B_02_HLA.DQB1	MS4A1
132	0	4.4015661375406	0.667	0.039	0	B_02_HLA.DQB1	BANK1
133	0	4.83453904113103	0.495	0.017	0	B_02_HLA.DQB1	VPREB3
134	0	3.97140345182181	0.511	0.045	0	B_02_HLA.DQB1	CD79B
135	0	3.88847056130953	0.475	0.026	0	B_02_HLA.DQB1	TNFRSF13C
136	0	4.82693073890029	0.415	0.015	0	B_02_HLA.DQB1	TNFRSF13B
137	0	3.77798083886131	0.309	0.046	0	B_02_HLA.DQB1	MIR29B2CHG
138	0	3.90624017623499	0.279	0.016	0	B_02_HLA.DQB1	CD19
139	0	4.55789169159935	0.257	0.01	0	B_02_HLA.DQB1	LINC00926
140	0	3.86311067533824	0.261	0.015	0	B_02_HLA.DQB1	FCRLA
141	0	6.5778858720674	0.963	0.115	0	Plasma_05_IGHG_IGHGP	IGHG1
142	0	6.52416439803108	0.923	0.115	0	Plasma_05_IGHG_IGHGP	IGHG4
143	0	5.03275745212354	0.857	0.049	0	Plasma_05_IGHG_IGHGP	MZB1
144	0	7.16890295931578	0.939	0.155	0	Plasma_05_IGHG_IGHGP	IGHG3
145	0	6.05672200566186	0.753	0.028	0	Plasma_05_IGHG_IGHGP	IGHG2
146	0	5.65420516155478	0.953	0.446	0	Plasma_05_IGHG_IGHGP	IGKC
147	0	8.77188862610324	0.516	0.011	0	Plasma_05_IGHG_IGHGP	IGHGP
148	0	5.03711110387169	0.695	0.225	0	Plasma_05_IGHG_IGHGP	IGLC2
149	0	4.90722576831241	0.535	0.151	0	Plasma_05_IGHG_IGHGP	IGLC3
150	0	5.47865308714414	0.34	0.008	0	Plasma_05_IGHG_IGHGP	JSRP1
151	0	4.75528813771636	0.914	0.054	0	Plasma_01_IGHA_MZB1	MZB1
152	0	5.73406148341261	0.958	0.11	0	Plasma_01_IGHA_MZB1	JCHAIN
153	0	4.57566724811196	0.828	0.041	0	Plasma_01_IGHA_MZB1	DERL3
154	0	6.21775414057464	0.953	0.22	0	Plasma_01_IGHA_MZB1	IGHA1
155	0	5.41989483244488	0.793	0.07	0	Plasma_01_IGHA_MZB1	IGHA2
156	0	4.95912183970181	0.592	0.018	0	Plasma_01_IGHA_MZB1	TNFRSF17
157	0	5.84781172054053	0.993	0.449	0	Plasma_01_IGHA_MZB1	IGKC
158	0	4.62083094243418	0.299	0.011	0	Plasma_01_IGHA_MZB1	JSRP1
159	0	4.09705721807297	0.271	0.011	0	Plasma_01_IGHA_MZB1	AC012236.1
160	6.94974813579471e-102	5.22436923360561	0.301	0.091	3.29147021459373e-97	Plasma_01_IGHA_MZB1	IGHM
161	0	6.22949256731934	0.416	0.009	0	Bn_06_GZMB	LILRA4
162	0	6.14287403524362	0.344	0.01	0	Bn_06_GZMB	SMPD3
163	0	6.43385897456409	0.331	0.006	0	Bn_06_GZMB	TCL1A
164	1.29943067135068e-205	4.27176264140604	0.818	0.106	6.15423360258395e-201	Bn_06_GZMB	GZMB
165	2.20353941517068e-198	6.12219566219451	0.299	0.014	1.04361830241899e-193	Bn_06_GZMB	MYBL2
166	3.86747960590731e-148	4.76529887863078	0.539	0.061	1.83167701615376e-143	Bn_06_GZMB	TSPAN13
167	3.50621857543141e-144	4.25622362490152	0.747	0.129	1.66058017951007e-139	Bn_06_GZMB	PLAC8
168	1.66028097432905e-133	4.27710216915306	0.273	0.017	7.86325672251981e-129	Bn_06_GZMB	FAM129C
169	3.65306180923647e-104	4.26108394656405	0.37	0.039	1.73012660347249e-99	Bn_06_GZMB	CLIC3
170	8.72879756374591e-96	4.47820674864915	0.377	0.044	4.1340458141657e-91	Bn_06_GZMB	IL3RA
171	0	5.2594968321155	0.742	0.022	0	Plasma_09_IGHG_RRM2	RRM2
172	0	5.29106767862029	0.699	0.014	0	Plasma_09_IGHG_RRM2	MYBL2
173	0	5.00479375036885	0.667	0.021	0	Plasma_09_IGHG_RRM2	TNFRSF17
174	0	6.66299643947435	0.398	0.004	0	Plasma_09_IGHG_RRM2	AL133467.1
175	0	5.58453577718816	0.366	0.008	0	Plasma_09_IGHG_RRM2	CCR10
176	4.04520000282268e-287	5.65230912381209	0.903	0.059	1.91584717333685e-282	Plasma_09_IGHG_RRM2	MZB1
177	4.0539299244766e-287	4.4828015405979	0.817	0.045	1.91998175153136e-282	Plasma_09_IGHG_RRM2	DERL3
178	1.87927284975952e-156	4.31641686714066	0.323	0.013	8.90042414374606e-152	Plasma_09_IGHG_RRM2	CDCA5
179	4.85028726895902e-91	4.44284551447505	0.613	0.073	2.29714455345168e-86	Plasma_09_IGHG_RRM2	IGHA2
180	2.67889510927988e-72	4.30347478715912	0.387	0.037	1.26875151270604e-67	Plasma_09_IGHG_RRM2	IGHG2
181	0	6.61280011179271	0.823	0.123	0	Plasma_06_IGHG_SFTPB	IGHG1
182	0	5.80911712791428	0.797	0.122	0	Plasma_06_IGHG_SFTPB	IGHG4
183	0	10.8455313603826	0.467	0.004	0	Plasma_06_IGHG_SFTPB	IGKV1-5
184	0	6.82769642948223	0.431	0.003	0	Plasma_06_IGHG_SFTPB	ANKRD36BP2
185	0	8.3096924740103	0.403	0.004	0	Plasma_06_IGHG_SFTPB	IGKV3-20
186	0	10.6822970727427	0.341	0.001	0	Plasma_06_IGHG_SFTPB	IGHV7-4-1
187	0	9.72806522267138	0.321	0.004	0	Plasma_06_IGHG_SFTPB	IGLV1-44
188	0	6.96607932376912	0.28	0.002	0	Plasma_06_IGHG_SFTPB	FER1L4
189	0	6.74340819339623	0.282	0.004	0	Plasma_06_IGHG_SFTPB	IGKV4-1
190	0	10.6079230701165	0.257	0.001	0	Plasma_06_IGHG_SFTPB	IGLV8-61
191	0	3.38795645141644	0.913	0.141	0	B_05_FYN	Metazoa-SRP
192	0	3.3026040461068	0.639	0.079	0	B_05_FYN	OR4D9
193	2.64991029937032e-260	3.25212021921615	0.51	0.064	1.25502401688478e-255	B_05_FYN	HELLPAR
194	2.74992674932838e-232	3.23063220384992	0.473	0.061	1.30239280774941e-227	B_05_FYN	TACC2
195	9.31006966537289e-228	3.21994533423762	0.468	0.061	4.40934209421725e-223	B_05_FYN	CACNB4
196	1.56306742975511e-181	3.25999736921335	0.324	0.037	7.40284365406319e-177	B_05_FYN	FLJ22447
197	8.48731091322837e-168	3.60509323014454	0.262	0.026	4.01967532161409e-163	B_05_FYN	TMEM213
198	5.16232748090765e-166	3.36507003543287	0.335	0.043	2.44492991823267e-161	B_05_FYN	AC074032.1
199	4.28430356632472e-156	3.31864910672331	0.29	0.034	2.02908901204705e-151	B_05_FYN	AC107463.1
200	7.47955501428853e-123	3.23572400023425	0.279	0.039	3.54239205031719e-118	B_05_FYN	AC074117.1
201	0	6.29013314502916	0.986	0.11	0	Plasma_02_IGHA_IGLC3	JCHAIN
202	0	5.40157785234809	0.93	0.054	0	Plasma_02_IGHA_IGLC3	MZB1
203	0	5.03685887118891	0.9	0.041	0	Plasma_02_IGHA_IGLC3	DERL3
204	0	5.5396260862682	0.845	0.07	0	Plasma_02_IGHA_IGLC3	IGHA2
205	0	5.41833883959776	0.912	0.152	0	Plasma_02_IGHA_IGLC3	IGLC3
206	0	6.97777947021694	0.972	0.22	0	Plasma_02_IGHA_IGLC3	IGHA1
207	0	6.59741030608552	0.935	0.227	0	Plasma_02_IGHA_IGLC3	IGLC2
208	0	5.28566830187605	0.694	0.018	0	Plasma_02_IGHA_IGLC3	TNFRSF17
209	0	4.89716617063363	0.342	0.011	0	Plasma_02_IGHA_IGLC3	JSRP1
210	7.03131632759644e-167	5.14960352709236	0.366	0.091	3.33010172591295e-162	Plasma_02_IGHA_IGLC3	IGHM
211	0	3.58541577639691	0.757	0.097	0	B_01_HLA-DRA	AP002990.1
212	0	3.46997730869979	0.76	0.124	0	B_01_HLA-DRA	EEF1G
213	0	3.4602265250074	0.684	0.085	0	B_01_HLA-DRA	LINC01641
214	0	3.37246937861203	0.631	0.053	0	B_01_HLA-DRA	HLA.DQB1
215	0	3.72489687826743	0.554	0.038	0	B_01_HLA-DRA	HLA.DQA1
216	0	3.36687568179922	0.567	0.081	0	B_01_HLA-DRA	CD79A
217	0	3.83203103899216	0.479	0.079	0	B_01_HLA-DRA	LY9
218	0	3.55697964912505	0.412	0.045	0	B_01_HLA-DRA	LMNTD1
219	0	4.2259464614586	0.26	0.025	0	B_01_HLA-DRA	C1orf132
220	0	3.80294303894939	0.262	0.033	0	B_01_HLA-DRA	TNFRSF13C
221	0	8.31453251524877	0.817	0.003	0	Plasma_04_IGHA_VPS13D	AC093599.1
222	0	7.81546153899574	0.801	0.004	0	Plasma_04_IGHA_VPS13D	F7
223	0	7.83426797039537	0.61	0.004	0	Plasma_04_IGHA_VPS13D	KIF7
224	0	7.46036324774858	0.459	0.002	0	Plasma_04_IGHA_VPS13D	AC002429.2
225	0	8.19734022615696	0.435	0.002	0	Plasma_04_IGHA_VPS13D	FRMD7
226	0	7.50410277030786	0.427	0.002	0	Plasma_04_IGHA_VPS13D	AC009120.3
227	0	7.64833522619631	0.386	0.001	0	Plasma_04_IGHA_VPS13D	OR8B12
228	0	7.18606450989664	0.386	0.002	0	Plasma_04_IGHA_VPS13D	OR51E2
229	0	7.56333262566688	0.346	0.001	0	Plasma_04_IGHA_VPS13D	MIR6829
230	0	7.13944885080759	0.346	0.002	0	Plasma_04_IGHA_VPS13D	SKOR1
231	0	8.44311836816137	0.988	0.005	0	Plasma_03_IGHA_GUSBP11	IGLL1
232	0	8.45121523669026	0.982	0.005	0	Plasma_03_IGHA_GUSBP11	GUSBP11
233	0	8.14610850023825	0.925	0.008	0	Plasma_03_IGHA_GUSBP11	IGLC7
234	0	8.37737547465651	0.828	0.015	0	Plasma_03_IGHA_GUSBP11	IGLL5
235	0	8.56402653735249	0.756	0.009	0	Plasma_03_IGHA_GUSBP11	IGLC1
236	0	8.22386465506188	0.389	0.001	0	Plasma_03_IGHA_GUSBP11	AP005229.2
237	0	8.02998834851542	0.361	0.001	0	Plasma_03_IGHA_GUSBP11	AL078582.1
238	0	7.71025396690633	0.331	0.001	0	Plasma_03_IGHA_GUSBP11	P2RX2
239	0	8.14972782710668	0.289	0.001	0	Plasma_03_IGHA_GUSBP11	AC003682.1
240	0	8.12803315163755	0.286	0.001	0	Plasma_03_IGHA_GUSBP11	AC114341.1
241	0	8.25012964217826	0.863	0.004	0	Plasma_07_IGHG_GRIFIN	F7
242	0	8.6495888237474	0.782	0.002	0	Plasma_07_IGHG_GRIFIN	AC093599.1
243	0	7.99703231731511	0.607	0.003	0	Plasma_07_IGHG_GRIFIN	KIF7
244	0	7.62802967199508	0.539	0.006	0	Plasma_07_IGHG_GRIFIN	COL22A1
245	0	8.19261117685915	0.492	0.002	0	Plasma_07_IGHG_GRIFIN	AC009120.3
246	0	8.10917677787996	0.427	0.001	0	Plasma_07_IGHG_GRIFIN	FRMD7
247	0	7.73318743875171	0.352	0.001	0	Plasma_07_IGHG_GRIFIN	OR8B12
248	0	7.91616257758213	0.33	0.001	0	Plasma_07_IGHG_GRIFIN	MIR6829
249	0	8.68404386370018	0.259	0.001	0	Plasma_07_IGHG_GRIFIN	LINC01805
250	0	8.12045024241417	0.255	0.001	0	Plasma_07_IGHG_GRIFIN	AP001341.1
251	0	8.66381263969665	0.99	0.005	0	Plasma_08_IGHG_GUSBP11	GUSBP11
252	0	8.82472199615858	0.98	0.005	0	Plasma_08_IGHG_GUSBP11	IGLL1
253	0	8.62874538624739	0.788	0.015	0	Plasma_08_IGHG_GUSBP11	IGLL5
254	0	8.84369364598523	0.699	0.01	0	Plasma_08_IGHG_GUSBP11	IGLC1
255	0	8.6243375341786	0.441	0.001	0	Plasma_08_IGHG_GUSBP11	P2RX2
256	0	8.59317832319065	0.408	0.001	0	Plasma_08_IGHG_GUSBP11	AL078582.1
257	0	8.84611972316725	0.399	0.001	0	Plasma_08_IGHG_GUSBP11	AP005229.2
258	0	8.53754281073373	0.307	0.001	0	Plasma_08_IGHG_GUSBP11	AC114341.1
259	0	8.62173365840104	0.307	0.001	0	Plasma_08_IGHG_GUSBP11	AC003682.1
260	0	8.0927116307576	0.255	0.001	0	Plasma_08_IGHG_GUSBP11	AL138916.2
261	0	4.74304423883618	0.866	0.063	0	B_04_PTMAP2	MS4A1
262	0	4.20115981945754	0.828	0.093	0	B_04_PTMAP2	CD79A
263	0	4.27033658754859	0.668	0.055	0	B_04_PTMAP2	BANK1
264	0	4.30379003685565	0.398	0.02	0	B_04_PTMAP2	PAX5
265	0	4.56787382015985	0.314	0.016	0	B_04_PTMAP2	FAM129C
266	0	4.76133930501842	0.29	0.016	0	B_04_PTMAP2	LINC00926
267	4.50665339615368e-297	4.03520843812684	0.442	0.048	2.13439611495234e-292	B_04_PTMAP2	RALGPS2
268	3.28166010661311e-277	4.02786045903513	0.293	0.023	1.55422704309304e-272	B_04_PTMAP2	CD19
269	4.52590592286062e-238	4.18117495984793	0.265	0.021	2.14351430412602e-233	B_04_PTMAP2	FCRLA
270	1.84014505983741e-214	4.33976960018345	0.293	0.029	8.71511101789598e-210	B_04_PTMAP2	HLA-DOB
271	0	4.34717886679492	0.747	0.063	0	Macrophage_08_SCGB3A2	PIGR
272	0	4.68538403602149	0.79	0.119	0	Macrophage_08_SCGB3A2	SCGB3A2
273	0	4.37308089694458	0.651	0.047	0	Macrophage_08_SCGB3A2	SLC34A2
274	0	4.87511440700181	0.526	0.035	0	Macrophage_08_SCGB3A2	CEACAM6
275	0	4.05350271682941	0.43	0.027	0	Macrophage_08_SCGB3A2	GPRC5A
276	0	4.42738984761325	0.351	0.018	0	Macrophage_08_SCGB3A2	SPINK1
277	0	4.63405751116745	0.309	0.01	0	Macrophage_08_SCGB3A2	LMO3
278	0	4.11701222400934	0.294	0.013	0	Macrophage_08_SCGB3A2	NKX2-1
279	0	5.03148174213342	0.265	0.009	0	Macrophage_08_SCGB3A2	MSLN
280	0	4.80067540250033	0.257	0.01	0	Macrophage_08_SCGB3A2	MALL
281	0	4.93659146595731	0.652	0.042	0	Macrophage_02_FCN1	FCN1
282	0	3.17362511503547	0.755	0.184	0	Macrophage_02_FCN1	IL1B
283	0	3.25259206954589	0.804	0.237	0	Macrophage_02_FCN1	S100A9
284	0	4.35892925427583	0.647	0.08	0	Macrophage_02_FCN1	EREG
285	0	3.27515059156792	0.702	0.139	0	Macrophage_02_FCN1	S100A8
286	0	3.94552107610482	0.645	0.09	0	Macrophage_02_FCN1	VCAN
287	0	3.20176047607492	0.424	0.069	0	Macrophage_02_FCN1	NLRP3
288	0	5.45625223563173	0.367	0.016	0	Macrophage_02_FCN1	CD300E
289	0	3.67608241450731	0.424	0.083	0	Macrophage_02_FCN1	THBS1
290	0	2.82364716517992	0.255	0.056	0	Macrophage_02_FCN1	AC020656.1
291	0	5.15123528858654	0.8	0.074	0	Macrophage_06_C3	C3
292	0	5.49248882361061	0.596	0.038	0	Macrophage_06_C3	CX3CR1
293	0	4.19523052201406	0.599	0.049	0	Macrophage_06_C3	PLD4
294	0	4.89518486706151	0.559	0.035	0	Macrophage_06_C3	OLFML3
295	0	4.17675218130351	0.407	0.041	0	Macrophage_06_C3	GAL3ST4
296	0	4.24726017251894	0.385	0.032	0	Macrophage_06_C3	ADORA3
297	0	5.17524066116075	0.332	0.014	0	Macrophage_06_C3	SIGLEC8
298	0	4.00710013400101	0.312	0.027	0	Macrophage_06_C3	LPAR5
299	0	4.33231001333652	0.318	0.043	0	Macrophage_06_C3	SLC2A5
300	0	7.52597229953556	0.262	0.004	0	Macrophage_06_C3	P2RY12
301	0	4.39276393524817	0.945	0.097	0	Macrophage_03_MARCO	MARCO
302	0	4.41039319754472	0.847	0.062	0	Macrophage_03_MARCO	MCEMP1
303	0	4.41988437777794	0.734	0.057	0	Macrophage_03_MARCO	RETN
304	0	6.0322877973902	0.625	0.019	0	Macrophage_03_MARCO	FABP4
305	0	5.46069814834337	0.587	0.023	0	Macrophage_03_MARCO	CES1
306	0	4.54568788418185	0.452	0.021	0	Macrophage_03_MARCO	PCOLCE2
307	0	4.68463697638282	0.356	0.017	0	Macrophage_03_MARCO	RBP4
308	0	4.63980431788538	0.329	0.011	0	Macrophage_03_MARCO	GPD1
309	0	5.07640551647074	0.287	0.011	0	Macrophage_03_MARCO	AC026369.3
310	0	5.64429361895472	0.256	0.006	0	Macrophage_03_MARCO	PARAL1
311	0	2.57174051540828	0.748	0.232	0	Macrophage_05_CSTB	GPNMB
312	0	2.59875390791248	0.737	0.264	0	Macrophage_05_CSTB	APOC1
313	0	2.54171620655365	0.599	0.248	0	Macrophage_05_CSTB	LIPA
314	0	3.8480476041572	0.321	0.044	0	Macrophage_05_CSTB	CHIT1
315	0	2.42173647775187	0.457	0.193	0	Macrophage_05_CSTB	GM2A
316	0	2.24352668320405	0.457	0.217	0	Macrophage_05_CSTB	FABP5
317	0	2.20167874169175	0.368	0.142	0	Macrophage_05_CSTB	TREM2
318	0	2.52512176961424	0.324	0.102	0	Macrophage_05_CSTB	CYP27A1
319	0	2.54710900432135	0.293	0.089	0	Macrophage_05_CSTB	PLA2G7
320	0	2.65134011941142	0.25	0.072	0	Macrophage_05_CSTB	LPL
321	0	4.42785495424233	0.549	0.043	0	cDC_01_CLEC10A	CLEC10A
322	0	4.67659027863668	0.479	0.024	0	cDC_01_CLEC10A	CD1C
323	0	4.90085155904431	0.446	0.015	0	cDC_01_CLEC10A	CD1E
324	0	4.15556571535667	0.439	0.029	0	cDC_01_CLEC10A	PKIB
325	0	3.91195152137624	0.393	0.025	0	cDC_01_CLEC10A	FCER1A
326	0	2.81371880594394	0.416	0.084	0	cDC_01_CLEC10A	HLA-DQA2
327	0	4.5921455657861	0.335	0.018	0	cDC_01_CLEC10A	LGALS2
328	0	3.49598977529043	0.311	0.035	0	cDC_01_CLEC10A	NAPSB
329	0	6.52275370470002	0.28	0.011	0	cDC_01_CLEC10A	CCL17
330	0	2.87270289633903	0.27	0.028	0	cDC_01_CLEC10A	HLA-DQB2
331	0	3.88940951234971	0.96	0.227	0	Macrophage_01_LGMN	APOE
332	0	3.83733651004675	0.85	0.132	0	Macrophage_01_LGMN	LGMN
333	0	3.72543218960602	0.647	0.085	0	Macrophage_01_LGMN	FUCA1
334	0	4.71917940814427	0.682	0.121	0	Macrophage_01_LGMN	CCL18
335	0	3.94574210831528	0.61	0.073	0	Macrophage_01_LGMN	PLTP
336	0	4.49261387893028	0.52	0.05	0	Macrophage_01_LGMN	SELENOP
337	0	3.78352549729159	0.513	0.05	0	Macrophage_01_LGMN	FOLR2
338	0	4.17723861114306	0.515	0.053	0	Macrophage_01_LGMN	SLC40A1
339	0	4.52889035824271	0.308	0.026	0	Macrophage_01_LGMN	CCL13
340	0	4.11677968336103	0.27	0.015	0	Macrophage_01_LGMN	LILRB5
341	0	9.42848664389544	0.982	0.013	0	Mast_01_GNB2L1	CPA3
342	0	10.0078	0.977	0.02	0	Mast_01_GNB2L1	TPSAB1
343	0	9.6552028850987	0.99	0.056	0	Mast_01_GNB2L1	TPSB2
344	0	8.43042669274243	0.914	0.011	0	Mast_01_GNB2L1	MS4A2
345	0	8.17099041451522	0.797	0.01	0	Mast_01_GNB2L1	GATA2
346	0	7.8264391800343	0.707	0.009	0	Mast_01_GNB2L1	KIT
347	0	8.20059211279337	0.666	0.005	0	Mast_01_GNB2L1	SLC18A2
348	0	8.09722964584055	0.519	0.004	0	Mast_01_GNB2L1	HDC
349	0	10.2194977560011	0.262	0.001	0	Mast_01_GNB2L1	RP11-354E11.2
350	0	9.07102217936704	0.261	0.003	0	Mast_01_GNB2L1	CTSG
351	0	3.61053297698521	0.978	0.036	0	Mast_02_CHIT1	CPA3
352	0	3.31649860936702	0.721	0.033	0	Mast_02_CHIT1	MS4A2
353	0	3.68513857462772	0.669	0.026	0	Mast_02_CHIT1	KIT
354	0	3.71389799891818	0.515	0.021	0	Mast_02_CHIT1	IL1RL1
355	2.72373837194627e-275	3.76992598484913	0.471	0.022	1.28998973033747e-270	Mast_02_CHIT1	SLC18A2
356	2.63140309632121e-191	3.1523444111939	0.463	0.029	1.24625882044869e-186	Mast_02_CHIT1	GATA2
357	6.80215924398923e-143	3.19578564651412	0.61	0.068	3.22157063954574e-138	Mast_02_CHIT1	HPGDS
358	3.49091853131944e-136	3.41033	0.522	0.052	1.6533339256182e-131	Mast_02_CHIT1	CHIT1
359	1.78816909907939e-133	3.65822748600841	0.331	0.022	8.46894767014992e-129	Mast_02_CHIT1	MAOB
360	1.0261893492987e-132	3.27321201774357	0.5	0.049	4.86013537721358e-128	Mast_02_CHIT1	LTC4S
361	0	1.18605247548179	0.773	0.324	0	Macrophage_07_IGKC	LYZ
362	0	2.93886960586281	0.271	0.042	0	Macrophage_07_IGKC	CXCL9
363	5.78425305067345e-307	1.41920513357395	0.457	0.183	2.73948008732945e-302	Macrophage_07_IGKC	CCL3
364	5.41105677697865e-163	1.4593208157144	0.357	0.169	2.56273060014486e-158	Macrophage_07_IGKC	C15orf48
365	2.2736939028487e-85	1.61168812776609	0.303	0.173	1.07684416932818e-80	Macrophage_07_IGKC	ICAM1
366	2.6599263001404e-77	1.45126999022317	0.269	0.151	1.2597676950095e-72	Macrophage_07_IGKC	SFTPB
367	2.87484249563538e-58	1.24353166330486	0.366	0.253	1.36155415435787e-53	Macrophage_07_IGKC	NR4A1
368	3.8161442275113e-55	1.87177194214618	0.309	0.21	1.80736406759162e-50	Macrophage_07_IGKC	SPINT2
369	6.6598363129534e-50	1.43886833974402	0.264	0.167	3.15416507617786e-45	Macrophage_07_IGKC	TNFAIP2
370	6.02373246643784e-35	1.41955860299034	0.253	0.172	2.85289993342963e-30	Macrophage_07_IGKC	ATP5MF
371	0	5.32588638082993	0.79	0.148	0	Neurophil_01_GOS2	G0S2
372	0	5.93008871512862	0.661	0.106	0	Neurophil_01_GOS2	CSF3R
373	0	5.0251337546702	0.792	0.259	0	Neurophil_01_GOS2	CXCL8
374	0	6.94259175169658	0.544	0.032	0	Neurophil_01_GOS2	FCGR3B
375	0	6.9205177985919	0.36	0.015	0	Neurophil_01_GOS2	CXCR2
376	0	5.79147078011552	0.333	0.027	0	Neurophil_01_GOS2	IL1R2
377	0	5.01090984070123	0.324	0.045	0	Neurophil_01_GOS2	NAMPTP1
378	0	5.31102051313457	0.302	0.039	0	Neurophil_01_GOS2	CLEC4E
379	0	5.96996512225605	0.283	0.023	0	Neurophil_01_GOS2	AC245128.3
380	0	5.69396368554575	0.276	0.025	0	Neurophil_01_GOS2	LRG1
381	0	4.75571224493698	0.922	0.205	0	Macrophage_04_SPP1	SPP1
382	0	3.52577872608973	0.599	0.081	0	Macrophage_04_SPP1	ADM
383	0	3.85602887175888	0.545	0.08	0	Macrophage_04_SPP1	HK2
384	0	3.30485698686428	0.559	0.097	0	Macrophage_04_SPP1	CCL2
385	0	3.33235700596689	0.434	0.035	0	Macrophage_04_SPP1	SLC2A5
386	0	4.14170055067593	0.39	0.031	0	Macrophage_04_SPP1	MMP12
387	0	3.66727355448184	0.394	0.057	0	Macrophage_04_SPP1	SLC2A1
388	0	4.94375784486663	0.327	0.023	0	Macrophage_04_SPP1	MT1G
389	0	3.6860884054346	0.345	0.043	0	Macrophage_04_SPP1	FCGBP
390	0	3.35742892068169	0.274	0.023	0	Macrophage_04_SPP1	PDPN
391	0	5.03734859918517	0.75	0.024	0	Macrophage_09_MKI67	MKI67
392	0	5.18636	0.727	0.025	0	Macrophage_09_MKI67	TOP2A
393	0	5.04867322811982	0.564	0.016	0	Macrophage_09_MKI67	UBE2C
394	0	4.80467935192684	0.528	0.018	0	Macrophage_09_MKI67	TPX2
395	0	5.42064840985356	0.471	0.01	0	Macrophage_09_MKI67	HMMR
396	0	4.76636061078609	0.446	0.014	0	Macrophage_09_MKI67	CCNB2
397	0	5.27273350567412	0.397	0.009	0	Macrophage_09_MKI67	CDC20
398	0	4.76892374834235	0.398	0.01	0	Macrophage_09_MKI67	AURKB
399	0	5.1475947393946	0.368	0.007	0	Macrophage_09_MKI67	DLGAP5
400	0	4.86383048744133	0.288	0.007	0	Macrophage_09_MKI67	KIF4A
401	0	7.79585464345679	0.936	0.016	0	cDC_02_CD207	CD1A
402	0	5.25438047751622	0.943	0.078	0	cDC_02_CD207	S100B
403	0	6.04029246945324	0.851	0.034	0	cDC_02_CD207	FCER1A
404	0	5.94760184318031	0.823	0.026	0	cDC_02_CD207	CD1E
405	0	7.78477577838283	0.81	0.014	0	cDC_02_CD207	CD207
406	0	5.30383343167596	0.774	0.037	0	cDC_02_CD207	CD1C
407	0	5.39136035154291	0.781	0.049	0	cDC_02_CD207	FCGBP
408	0	7.2871450339697	0.703	0.033	0	cDC_02_CD207	HLA-DQB2
409	0	5.61719868192034	0.577	0.023	0	cDC_02_CD207	PLEK2
410	0	7.30761953973883	0.424	0.003	0	cDC_02_CD207	IL22RA2
411	0	7.63855237273798	0.704	0.006	0	pDC_03_GZMB	LILRA4
412	0	6.38770282213328	0.533	0.008	0	pDC_03_GZMB	SMPD3
413	0	7.38181517159713	0.455	0.005	0	pDC_03_GZMB	TCL1A
414	0	6.35377872796928	0.386	0.01	0	pDC_03_GZMB	PTCRA
415	0	7.23252432214984	0.347	0.004	0	pDC_03_GZMB	KRT5
416	0	8.47585238941841	0.336	0.001	0	pDC_03_GZMB	SCT
417	0	7.70222919441035	0.332	0.001	0	pDC_03_GZMB	CLEC4C
418	0	7.38279	0.305	0.001	0	pDC_03_GZMB	LRRC26
419	0	6.4404614720463	0.296	0.003	0	pDC_03_GZMB	PACSIN1
420	0	8.07377512091389	0.286	0.001	0	pDC_03_GZMB	SHD
421	0	6.26015176151829	0.72	0.009	0	Mast_03_PBK	AL157895.1
422	1.22875305629103e-261	5.83419896716918	0.32	0.002	5.81949734989993e-257	Mast_03_PBK	CMA1
423	1.08983261021913e-255	6.34493416130774	0.68	0.01	5.16155622525885e-251	Mast_03_PBK	CTSG
424	5.83248378982114e-253	6.02668594486826	0.88	0.016	2.76232264769719e-248	Mast_03_PBK	HDC
425	6.91404867000092e-191	6.1856557767632	0.48	0.006	3.27456259059914e-186	Mast_03_PBK	SVOPL
426	6.88906791186498e-163	5.81341318204726	1	0.034	3.26273145373838e-158	Mast_03_PBK	MS4A2
427	5.28608290642519e-156	5.74337621753913	0.56	0.011	2.50354172531203e-151	Mast_03_PBK	SPC25
428	2.79311132764095e-146	7.45841124732602	0.4	0.006	1.32284545588403e-141	Mast_03_PBK	PBK
429	8.62560651429404e-128	6.31907085359557	0.32	0.004	4.0851735012348e-123	Mast_03_PBK	ADCYAP1
430	4.04195961917186e-85	6.94547478740268	0.32	0.006	1.91431249523599e-80	Mast_03_PBK	RHEX
431	0	5.55250845010733	0.803	0.029	0	Endothelial_09_S100A14	AQP1
432	0	5.69089752595216	0.526	0.008	0	Endothelial_09_S100A14	ACKR1
433	2.86772506973057e-266	5.20432761872098	0.303	0.005	1.3581832702751e-261	Endothelial_09_S100A14	TEK
434	1.64435239319332e-253	5.35289427390433	0.276	0.005	7.78781736940288e-249	Endothelial_09_S100A14	SELP
435	6.28036312141097e-232	5.15596190237303	0.553	0.021	2.97444277793145e-227	Endothelial_09_S100A14	PCDH17
436	3.21462125349837e-213	5.18462791253113	0.329	0.008	1.52247677186937e-208	Endothelial_09_S100A14	IL33
437	2.50850571918642e-173	5.54763720414323	0.368	0.012	1.18805339366388e-168	Endothelial_09_S100A14	MSLN
438	1.36861167065199e-147	5.19761911526796	0.289	0.009	6.48188173337491e-143	Endothelial_09_S100A14	FOXQ1
439	4.00303704986611e-131	5.14816234752941	0.474	0.027	1.89587837718709e-126	Endothelial_09_S100A14	FOLR1
440	5.41761365258977e-30	5.14850776854156	0.421	0.08	2.56583600200304e-25	Endothelial_09_S100A14	SFTPA1
441	0	6.66260524953585	0.723	0.014	0	Endothelial_01_FCN3	VWF
442	0	6.85143568021953	0.576	0.009	0	Endothelial_01_FCN3	CLEC14A
443	0	6.79136680479071	0.534	0.009	0	Endothelial_01_FCN3	CLDN5
444	0	6.6852095622178	0.516	0.009	0	Endothelial_01_FCN3	CDH5
445	0	6.56041364411831	0.427	0.008	0	Endothelial_01_FCN3	ADGRL4
446	0	7.10719886168291	0.423	0.006	0	Endothelial_01_FCN3	RAMP3
447	0	8.69028373884206	0.397	0.004	0	Endothelial_01_FCN3	FCN3
448	0	6.55124104633177	0.39	0.007	0	Endothelial_01_FCN3	SLCO2A1
449	0	6.74897767869608	0.308	0.007	0	Endothelial_01_FCN3	FAM107A
450	0	6.96756261371696	0.25	0.004	0	Endothelial_01_FCN3	TMEM100
451	0	7.42293671318938	0.827	0.011	0	Endothelial_04_DKK2	CLEC14A
452	0	9.44220859926239	0.704	0.003	0	Endothelial_04_DKK2	GJA5
453	0	7.7079772270353	0.698	0.007	0	Endothelial_04_DKK2	IL33
454	0	8.23450368767017	0.682	0.005	0	Endothelial_04_DKK2	TMEM100
455	0	9.96236486626868	0.626	0.003	0	Endothelial_04_DKK2	DKK2
456	0	8.00763862411528	0.609	0.004	0	Endothelial_04_DKK2	NPR3
457	0	7.72800028732519	0.458	0.003	0	Endothelial_04_DKK2	SEMA3G
458	0	8.01765514299914	0.458	0.003	0	Endothelial_04_DKK2	SOX17
459	0	8.70035241005619	0.341	0.001	0	Endothelial_04_DKK2	SSTR1
460	0	7.36884002524923	0.346	0.007	0	Endothelial_04_DKK2	DEPP1
461	0	12.4502804306102	0.925	0.004	0	Endothelial_08_CCL21	CCL21
462	0	9.00657784090723	0.841	0.006	0	Endothelial_08_CCL21	MMRN1
463	0	7.92875828644287	0.822	0.013	0	Endothelial_08_CCL21	TFF3
464	0	7.64601735592472	0.533	0.004	0	Endothelial_08_CCL21	TBX1
465	0	6.96571429956172	0.505	0.006	0	Endothelial_08_CCL21	FLT4
466	0	6.74848328682189	0.505	0.007	0	Endothelial_08_CCL21	MYCT1
467	0	7.28177894841092	0.383	0.003	0	Endothelial_08_CCL21	GPM6A
468	0	7.91399250091788	0.383	0.003	0	Endothelial_08_CCL21	RELN
469	0	6.7695691241255	0.318	0.004	0	Endothelial_08_CCL21	CHRDL1
470	0	7.73202720616841	0.28	0.001	0	Endothelial_08_CCL21	STAB2
471	0	5.07128317992015	0.709	0.018	0	Endothelial_06_CD68	VWF
472	0	5.04731313431627	0.479	0.011	0	Endothelial_06_CD68	CDH5
473	0	5.28392564944184	0.479	0.012	0	Endothelial_06_CD68	EMCN
474	0	5.27477078039181	0.333	0.008	0	Endothelial_06_CD68	RAMP3
475	9.76227947975751e-303	5.02504237291886	0.419	0.014	4.62351318440795e-298	Endothelial_06_CD68	PODXL
476	1.207135146383e-292	5.13566296881969	0.41	0.014	5.71711276678452e-288	Endothelial_06_CD68	CD34
477	2.37404048868335e-265	5.09600615194005	0.479	0.021	1.12436931584532e-260	Endothelial_06_CD68	PCDH17
478	3.23268735124247e-252	4.87189080438592	0.316	0.009	1.53103305642194e-247	Endothelial_06_CD68	MMRN2
479	1.54626860935012e-215	5.10074885430653	0.274	0.008	7.32328276074309e-211	Endothelial_06_CD68	FAM107A
480	6.51169629819459e-201	5.46257706804599	0.385	0.017	3.08400448378794e-196	Endothelial_06_CD68	PLVAP
481	0	8.81852635086184	0.98	0.007	0	Endothelial_03_VCAM1	ACKR1
482	0	7.22924894293289	0.974	0.016	0	Endothelial_03_VCAM1	VWF
483	0	7.2218073028494	0.807	0.006	0	Endothelial_03_VCAM1	RAMP3
484	0	6.80855336171796	0.774	0.007	0	Endothelial_03_VCAM1	IL33
485	0	7.56496846980571	0.692	0.004	0	Endothelial_03_VCAM1	SELP
486	0	7.05598100873779	0.61	0.005	0	Endothelial_03_VCAM1	MMRN1
487	0	7.15778545227647	0.544	0.005	0	Endothelial_03_VCAM1	FAM167B
488	0	7.40166213953447	0.528	0.003	0	Endothelial_03_VCAM1	CCL14
489	0	8.80468740911413	0.413	0.002	0	Endothelial_03_VCAM1	SELE
490	0	6.92056790000303	0.308	0.002	0	Endothelial_03_VCAM1	TLL1
491	0	7.34107014368172	0.923	0.011	0	Endothelial_02_PTMAP2	CD34
492	0	7.88949294903327	0.859	0.015	0	Endothelial_02_PTMAP2	PLVAP
493	0	6.87205857543011	0.849	0.008	0	Endothelial_02_PTMAP2	ADGRL4
494	0	7.05989811651437	0.782	0.007	0	Endothelial_02_PTMAP2	SOX18
495	0	7.20688010477049	0.727	0.006	0	Endothelial_02_PTMAP2	TM4SF18
496	0	7.53381851594471	0.436	0.003	0	Endothelial_02_PTMAP2	APLNR
497	0	7.71352030754646	0.426	0.005	0	Endothelial_02_PTMAP2	STC1
498	0	7.80025782265453	0.365	0.003	0	Endothelial_02_PTMAP2	ESM1
499	0	6.87136342139359	0.344	0.005	0	Endothelial_02_PTMAP2	INHBB
500	0	7.03133584930167	0.285	0.007	0	Endothelial_02_PTMAP2	APLN
501	0	6.28785202980907	0.923	0.037	0	Endothelial_07_NOTCH3	RGS5
502	0	6.51731058956319	0.504	0.005	0	Endothelial_07_NOTCH3	HIGD1B
503	0	6.4950197928449	0.444	0.005	0	Endothelial_07_NOTCH3	FCN3
504	0	6.57745387825726	0.342	0.003	0	Endothelial_07_NOTCH3	COX4I2
505	0	6.47338527273127	0.342	0.004	0	Endothelial_07_NOTCH3	FAM162B
506	0	7.44571945338509	0.316	0.002	0	Endothelial_07_NOTCH3	C1QTNF5
507	0	6.18821830473851	0.316	0.005	0	Endothelial_07_NOTCH3	KCNK3
508	0	6.96243398737403	0.308	0.002	0	Endothelial_07_NOTCH3	MFRP
509	0	6.23348320012189	0.308	0.004	0	Endothelial_07_NOTCH3	LAMC3
510	0	6.32114387794535	0.291	0.004	0	Endothelial_07_NOTCH3	CLEC3B
511	0	8.65898220644186	0.891	0.016	0	Endothelial_05_IL1RL1	EDNRB
512	0	7.54998174507926	0.739	0.012	0	Endothelial_05_IL1RL1	EMCN
513	0	7.37607032143844	0.605	0.009	0	Endothelial_05_IL1RL1	SLCO2A1
514	0	7.63650332021116	0.563	0.007	0	Endothelial_05_IL1RL1	TSPAN12
515	0	8.60396281384218	0.546	0.003	0	Endothelial_05_IL1RL1	CA4
516	0	7.53380733919335	0.513	0.007	0	Endothelial_05_IL1RL1	TBX3
517	0	8.22583402935026	0.504	0.003	0	Endothelial_05_IL1RL1	FENDRR
518	0	7.27484538762417	0.454	0.006	0	Endothelial_05_IL1RL1	FOXF1
519	0	11.4763120716659	0.42	0.001	0	Endothelial_05_IL1RL1	SOSTDC1
520	0	8.79820713239004	0.286	0.003	0	Endothelial_05_IL1RL1	S100A3
521	0	7.2792519238415	0.907	0.03	0	Fibroblast_04_Alveolar_DPT	DCN
522	0	7.73210583490556	0.736	0.014	0	Fibroblast_04_Alveolar_DPT	FBLN1
523	0	7.73410534356451	0.61	0.007	0	Fibroblast_04_Alveolar_DPT	MFAP4
524	0	7.45633958082614	0.538	0.007	0	Fibroblast_04_Alveolar_DPT	C7
525	0	7.94433733759521	0.493	0.006	0	Fibroblast_04_Alveolar_DPT	ADH1B
526	0	7.35865325768314	0.399	0.004	0	Fibroblast_04_Alveolar_DPT	FMO2
527	0	8.06839552201787	0.386	0.002	0	Fibroblast_04_Alveolar_DPT	DPT
528	0	7.75109132930339	0.311	0.002	0	Fibroblast_04_Alveolar_DPT	TCF21
529	0	7.43013822961644	0.309	0.005	0	Fibroblast_04_Alveolar_DPT	SFRP2
530	0	7.57371711497888	0.263	0.002	0	Fibroblast_04_Alveolar_DPT	CHRDL1
531	0	7.77506282929772	0.992	0.041	0	Fibroblast_02_Myo_COL10A1	COL3A1
532	0	7.48848676473566	0.999	0.053	0	Fibroblast_02_Myo_COL10A1	COL1A2
533	0	7.84051356585788	0.995	0.085	0	Fibroblast_02_Myo_COL10A1	COL1A1
534	0	7.31213056146821	0.836	0.015	0	Fibroblast_02_Myo_COL10A1	CTHRC1
535	0	7.88445513646963	0.796	0.008	0	Fibroblast_02_Myo_COL10A1	MXRA5
536	0	7.26834121922234	0.655	0.014	0	Fibroblast_02_Myo_COL10A1	POSTN
537	0	8.58702974146378	0.519	0.003	0	Fibroblast_02_Myo_COL10A1	COL11A1
538	0	8.15499097207017	0.496	0.003	0	Fibroblast_02_Myo_COL10A1	COL10A1
539	0	8.51870717905889	0.426	0.008	0	Fibroblast_02_Myo_COL10A1	MMP11
540	0	7.66321673481783	0.399	0.002	0	Fibroblast_02_Myo_COL10A1	FNDC1
541	0	4.62224450347022	0.879	0.037	0	Fibroblast_06_Alveolar_MS4A7	DCN
542	0	4.39012430089426	0.736	0.028	0	Fibroblast_06_Alveolar_MS4A7	LUM
543	0	4.93044394062246	0.637	0.024	0	Fibroblast_06_Alveolar_MS4A7	CCDC80
544	0	4.93589832592052	0.615	0.02	0	Fibroblast_06_Alveolar_MS4A7	FBLN1
545	0	5.35617487489241	0.352	0.007	0	Fibroblast_06_Alveolar_MS4A7	SFRP2
546	3.12522534707522e-235	4.40812	0.637	0.032	1.4801379766283e-230	Fibroblast_06_Alveolar_MS4A7	COL6A3
547	3.52891142881358e-172	4.28744417401587	0.33	0.012	1.6713277418004e-167	Fibroblast_06_Alveolar_MS4A7	PLAC9
548	1.63072870674478e-168	5.24188976086339	0.264	0.008	7.72329422801394e-164	Fibroblast_06_Alveolar_MS4A7	BICC1
549	6.77775658149522e-168	4.56902034604148	0.385	0.016	3.21001329456195e-163	Fibroblast_06_Alveolar_MS4A7	IGFBP5
550	6.13727972828686e-99	4.32087516531096	0.275	0.014	2.90667705211394e-94	Fibroblast_06_Alveolar_MS4A7	IGFBP6
551	0	7.68366085941951	0.924	0.021	0	Fibroblast_01_Myo_HIGD1B	NOTCH3
552	0	7.92431113048366	0.735	0.007	0	Fibroblast_01_Myo_HIGD1B	NDUFA4L2
553	0	7.93767529022466	0.596	0.004	0	Fibroblast_01_Myo_HIGD1B	ABCC9
554	0	7.75071957095395	0.548	0.005	0	Fibroblast_01_Myo_HIGD1B	SMOC2
555	0	8.58979454605086	0.542	0.002	0	Fibroblast_01_Myo_HIGD1B	HIGD1B
556	0	7.86828151297529	0.533	0.003	0	Fibroblast_01_Myo_HIGD1B	ENPEP
557	0	7.86172572499227	0.524	0.003	0	Fibroblast_01_Myo_HIGD1B	CSPG4
558	0	7.91025219779161	0.516	0.005	0	Fibroblast_01_Myo_HIGD1B	EGFL6
559	0	7.77679384470373	0.458	0.003	0	Fibroblast_01_Myo_HIGD1B	KCNJ8
560	0	7.70733919231703	0.296	0.002	0	Fibroblast_01_Myo_HIGD1B	FAM162B
561	0	8.1174726248122	0.898	0.02	0	Fibroblast_05_Alveolar_MYH11	MYH11
562	0	7.68388423683344	0.906	0.037	0	Fibroblast_05_Alveolar_MYH11	TAGLN
563	0	9.02510121872287	0.598	0.003	0	Fibroblast_05_Alveolar_MYH11	PLN
564	0	7.25860759017584	0.539	0.007	0	Fibroblast_05_Alveolar_MYH11	LMOD1
565	0	7.75012007182877	0.509	0.005	0	Fibroblast_05_Alveolar_MYH11	ACTG2
566	0	8.08644529789125	0.506	0.004	0	Fibroblast_05_Alveolar_MYH11	CNN1
567	0	9.04852316099076	0.308	0.001	0	Fibroblast_05_Alveolar_MYH11	DES
568	0	7.44303471745753	0.308	0.002	0	Fibroblast_05_Alveolar_MYH11	MYOCD
569	0	8.2492769513121	0.295	0.001	0	Fibroblast_05_Alveolar_MYH11	CASQ2
570	0	8.00646177929404	0.27	0.001	0	Fibroblast_05_Alveolar_MYH11	RERGL
571	0	6.37461633219033	0.919	0.025	0	Fibroblast_03_Myo_MKI67	THY1
572	0	6.12179719189761	0.581	0.01	0	Fibroblast_03_Myo_MKI67	GUCY1B3
573	0	6.37714230132485	0.568	0.009	0	Fibroblast_03_Myo_MKI67	COL5A3
574	0	5.9128918643985	0.568	0.012	0	Fibroblast_03_Myo_MKI67	MXRA5
575	0	6.03875960316257	0.459	0.006	0	Fibroblast_03_Myo_MKI67	PBK
576	0	5.93445900316396	0.365	0.006	0	Fibroblast_03_Myo_MKI67	ENPEP
577	0	7.47396526188802	0.338	0.001	0	Fibroblast_03_Myo_MKI67	TMSB15A
578	0	5.95488880469945	0.324	0.005	0	Fibroblast_03_Myo_MKI67	EGFLAM
579	1.32246138218289e-299	6.29619892601196	0.297	0.005	6.26330935215638e-295	Fibroblast_03_Myo_MKI67	RGS4
580	1.36630275121708e-182	6.10075066313951	0.973	0.089	6.4709464600392e-178	Fibroblast_03_Myo_MKI67	COL1A1
581	0	5.71198326098539	0.728	0.043	0	Astrocyte_02_MALAT1	PLEKHB1
582	0	5.40622815648357	0.688	0.028	0	Astrocyte_02_MALAT1	MOBP
583	0	5.62315119982562	0.675	0.042	0	Astrocyte_02_MALAT1	MAP1B
584	0	5.69007691789627	0.554	0.033	0	Astrocyte_02_MALAT1	BCAS1
585	0	5.71577800574144	0.384	0.018	0	Astrocyte_02_MALAT1	CNTNAP4
586	0	5.41343510420161	0.404	0.05	0	Astrocyte_02_MALAT1	MTURN
587	0	5.67406583456019	0.368	0.018	0	Astrocyte_02_MALAT1	NKX6-2
588	0	5.58837298654806	0.32	0.021	0	Astrocyte_02_MALAT1	COBL
589	0	6.27734280949182	0.28	0.013	0	Astrocyte_02_MALAT1	PMP2
590	0	5.62134612022076	0.263	0.017	0	Astrocyte_02_MALAT1	FGF1
591	0	5.49105432650597	0.851	0.029	0	Astrocyte_06_CCL5	TPPP
592	0	5.60408816047663	0.851	0.043	0	Astrocyte_06_CCL5	CDK18
593	0	5.51349971266952	0.763	0.022	0	Astrocyte_06_CCL5	ELAVL3
594	0	5.69868157859209	0.719	0.019	0	Astrocyte_06_CCL5	SOX8
595	0	5.54199365210822	0.649	0.019	0	Astrocyte_06_CCL5	CORO2B
596	0	6.11824914937488	0.553	0.013	0	Astrocyte_06_CCL5	MIR219A2
597	0	5.52274180500989	0.491	0.015	0	Astrocyte_06_CCL5	CPEB1
598	6.55092938306097e-300	5.76700786323399	0.395	0.012	3.10258566511151e-295	Astrocyte_06_CCL5	SLC5A11
599	2.41121336653631e-274	6.18896069154788	0.281	0.007	1.14197476252526e-269	Astrocyte_06_CCL5	AC098679.2
600	7.05770676369075e-241	5.60152570597187	0.281	0.008	3.34260050035158e-236	Astrocyte_06_CCL5	ANKRD18A
601	0	6.05727805259897	1	0.028	0	Astrocyte_03_ROM1	TF
602	0	6.14230952375107	0.995	0.025	0	Astrocyte_03_ROM1	KCNMB4
603	0	6.04007511160584	0.941	0.017	0	Astrocyte_03_ROM1	STMN4
604	0	6.02665251714669	0.887	0.015	0	Astrocyte_03_ROM1	GALNT15
605	0	5.9907541150423	0.838	0.013	0	Astrocyte_03_ROM1	PCDH10
606	0	6.27143884049118	0.737	0.01	0	Astrocyte_03_ROM1	CDH19
607	0	6.02014374346115	0.557	0.012	0	Astrocyte_03_ROM1	NGFR
608	0	6.18940547574953	0.532	0.006	0	Astrocyte_03_ROM1	PRIMA1
609	0	6.15485088505688	0.468	0.005	0	Astrocyte_03_ROM1	AL358216.1
610	0	6.29380188507458	0.263	0.002	0	Astrocyte_03_ROM1	OR7A5
611	0	6.54553882919337	1	0.035	0	Astrocyte_01_CAV1	CRYAB
612	0	6.26243140990007	0.914	0.014	0	Astrocyte_01_CAV1	SLC24A2
613	0	6.26229701823005	0.885	0.012	0	Astrocyte_01_CAV1	NKX6-2
614	0	6.56182164948153	0.882	0.011	0	Astrocyte_01_CAV1	SOX8
615	0	6.54429	0.869	0.011	0	Astrocyte_01_CAV1	TMEM151A
616	0	6.84549056221419	0.668	0.008	0	Astrocyte_01_CAV1	MIR219A2
617	0	6.40022367456654	0.639	0.008	0	Astrocyte_01_CAV1	POU3F3
618	0	6.26623159502716	0.624	0.009	0	Astrocyte_01_CAV1	LRRC4B
619	0	6.75201160820882	0.399	0.004	0	Astrocyte_01_CAV1	NKX2-2
620	0	6.31625281271946	0.284	0.002	0	Astrocyte_01_CAV1	AC009063.2
621	0	6.21371188365172	0.871	0.015	0	Astrocyte_05_HLA-DRB5	TUBB2B
622	0	6.38280271343082	0.865	0.016	0	Astrocyte_05_HLA-DRB5	PCDH10
623	0	6.29226380191374	0.815	0.014	0	Astrocyte_05_HLA-DRB5	KCND3
624	0	6.30068571543169	0.73	0.013	0	Astrocyte_05_HLA-DRB5	NGFR
625	0	6.40225503135189	0.517	0.004	0	Astrocyte_05_HLA-DRB5	GRIA3
626	0	6.26870452249583	0.517	0.006	0	Astrocyte_05_HLA-DRB5	DIRAS3
627	0	7.29753740569458	0.438	0.002	0	Astrocyte_05_HLA-DRB5	MCHR1
628	0	8.38155121110031	0.365	0.001	0	Astrocyte_05_HLA-DRB5	CITED1
629	0	6.51545295431878	0.331	0.002	0	Astrocyte_05_HLA-DRB5	PCSK1
630	0	6.25395149988822	0.315	0.003	0	Astrocyte_05_HLA-DRB5	AP001350.2
631	0	6.31136998072772	0.983	0.018	0	Astrocyte_04_SCGB3A1	STMN4
632	0	6.86179259203781	0.937	0.011	0	Astrocyte_04_SCGB3A1	OPALIN
633	0	6.39465611767088	0.933	0.015	0	Astrocyte_04_SCGB3A1	PRR18
634	0	6.38385911177606	0.898	0.015	0	Astrocyte_04_SCGB3A1	GPR37
635	0	7.58371711127458	0.79	0.005	0	Astrocyte_04_SCGB3A1	LINC00844
636	0	6.63444459588053	0.587	0.005	0	Astrocyte_04_SCGB3A1	GPR37L1
637	0	6.28722319151587	0.576	0.007	0	Astrocyte_04_SCGB3A1	LINC00320
638	0	6.69147109894426	0.552	0.006	0	Astrocyte_04_SCGB3A1	AL358216.1
639	0	6.32600865372352	0.264	0.002	0	Astrocyte_04_SCGB3A1	KCTD4
640	0	6.83682539416523	0.26	0.002	0	Astrocyte_04_SCGB3A1	VSTM2B

## Sheet: Sheet3
Table S3. Pearson correlation of frequencies of TIME cell subsets. Related to Figure 2.
	Astrocyte_01_CAV1	Astrocyte_02_MALAT1	Astrocyte_03_ROM1	Astrocyte_04_SCGB3A1	Astrocyte_05_HLA.DRB5	Astrocyte_06_CCL5	B_01_HLA.DRA	B_02_HLA.DQB1	B_03_CD3E	B_04_PTMAP2	B_05_FYN	Bn_06_GZMB	CD4T_01_IL7R	CD4T_02_GNB2L1	CD4T_03_SCGB3A1	CD4T_04_SNORD3A	CD4T_05_SFTPB	CD4T_06_ACSL5	CD8T_01_CCL5	CD8T_02_GZMB	CD8T_03_MKI67	CD8T_04_HLA.B	cDC_01_CLEC10A	cDC_02_CD207	Endothelial_01_FCN3	Endothelial_02_PTMAP2	Endothelial_03_VCAM1	Endothelial_04_DKK2	Endothelial_05_IL1RL1	Endothelial_06_CD68	Endothelial_07_NOTCH3	Endothelial_08_CCL21	Endothelial_09_S100A14	Fibroblast_01_Myo_HIGD1B	Fibroblast_02_Myo_COL10A1	Fibroblast_03_Myo_MKI67	Fibroblast_04_Alveolar_DPT	Fibroblast_05_Alveolar_MYH11	Fibroblast_06_Alveolar_MS4A7	Macrophage_01_LGMN	Macrophage_02_FCN1	Macrophage_03_MARCO	Macrophage_04_SPP1	Macrophage_05_CSTB	Macrophage_06_C3	Macrophage_07_IGKC	Macrophage_08_SCGB3A2	Macrophage_09_MKI67	Mast_01_GNB2L1
Astrocyte_01_CAV1	1	0.898504690883793	0.00335394933013395	0.00683628103452174	0.0540488861781426	0.829933653521903	-0.0589444	-0.0745213	-0.0828305	0.0184755487028543	-0.0225859	-0.0491345	-0.116649	-0.0763788	-0.0568553	-0.0107335	-0.055639	-0.0208176	0.104551470066385	-0.0727216	-0.135831	0.007029227299697	-0.129069	-0.0853928	-0.116308	0.125330670179389	-0.0824234	-0.110039	-0.0708859	-0.0785977	0.0374241872791238	-0.102381	-0.0636658	-0.0499132	-0.0513721	-0.0413366	-0.0587735	0.0335965280004561	-0.0521297	-0.0441754	-0.15959	-0.0839326	-0.0700158	0.121231609469885	0.569053489040427	-0.0803993	-0.0623611	-0.11932	-0.0980032
Astrocyte_02_MALAT1	0.898504690883793	1	0.265822580408314	0.310554526715876	0.270474446907072	0.92121023124684	-0.0980985	-0.133351	-0.128845	0.0551378259187913	-0.0458207	-0.0354571	-0.195291	-0.111605	-0.0805851	0.0182093381446117	-0.0764554	-0.0382855	0.0596663193833171	-0.0966327	-0.0703573	-0.00248579	-0.146316	-0.132442	-0.169038	0.240014310764777	-0.148503	-0.182411	-0.124537	-0.0835897	0.133230955350112	-0.180887	-0.115204	0.137874928203463	-0.0788308	0.00974084315197686	-0.100197	0.0761621999852315	-0.0681634	0.00542569243926431	-0.139896	-0.137278	-0.11601	0.122757583438637	0.62952567396235	-0.121708	-0.104376	-0.160169	-0.133245
Astrocyte_03_ROM1	0.00335394933013395	0.265822580408314	1	0.120716418259574	0.0255595701695997	0.0872683660830326	-0.0892123	-0.110311	-0.124913	0.0821795127240241	-0.0668119	0.0722776309634334	-0.110774	-0.110956	-0.0634155	0.0227212822071666	-0.0782152	-0.0276074	-0.0104839	0.00592577192191462	0.254891452826389	0.000213967599059666	0.0503829486853683	-0.0804573	-0.0729696	0.48213613883072	-0.124748	-0.110243	-0.107286	-0.00476255	0.292426883342935	-0.154954	-0.0963583	0.495454828802117	-0.00567997	0.229326282129648	-0.0703525	0.0925165310006807	0.0625090127131151	0.152077077105304	-0.0185604	-0.122632	-0.0823307	0.0364259062756818	0.31181276415133	-0.0979178	-0.0818933	-0.0702948	-0.115123
Astrocyte_04_SCGB3A1	0.00683628103452174	0.310554526715876	0.120716418259574	1	0.0781492769660787	0.558896358479694	-0.0576172	-0.0749403	-0.0787766	0.0932018607534924	-0.0327509	-0.0325515	-0.130108	-0.0776662	-0.0371345	0.0344944476383467	-0.0480423	-0.0198896	-0.0588541	-0.068726	-0.0504307	-0.00987991	-0.025328	-0.0514655	-0.0850798	0.0642103480445832	-0.0805676	-0.108023	-0.0692899	0.0303447224483506	0.258727025525466	-0.100076	-0.0622324	0.219112919480519	-0.0479588	0.0012660944603615	-0.0506962	0.196678606182713	-0.101139	0.0311995605340841	0.0153639601419829	-0.078991	-0.0515392	-0.00973566	0.321244200847711	-0.0585294	-0.0560787	-0.0414972	-0.106577
Astrocyte_05_HLA.DRB5	0.0540488861781426	0.270474446907072	0.0255595701695997	0.0781492769660787	1	0.0858424548486603	-0.070166	-0.092232	-0.0895664	-0.0271604	-0.0324091	-0.0441588	-0.161278	-0.0967657	-0.0626602	0.0969954189896659	-0.0501818	-0.0291025	-0.0668665	-0.0545925	0.0922419096469041	-0.0262825	-0.109889	-0.0946017	-0.120364	0.103590275835613	-0.0981149	-0.129631	-0.0843809	-0.0821672	-0.0485703	-0.121872	-0.0757863	0.118140143046396	-0.0554301	-0.0195424	-0.0626405	-0.0897632	-0.0477496	-0.0262895	0.102142432145533	-0.072738	-0.0815854	0.0158716032692989	-0.00767096	-0.0640831	-0.0704688	-0.0748873	-0.119739
Astrocyte_06_CCL5	0.829933653521903	0.92121023124684	0.0872683660830326	0.558896358479694	0.0858424548486603	1	-0.0522706	-0.112387	-0.0903203	0.0637173552610578	0.00171152233191587	-0.0313346	-0.145964	-0.110827	-0.0751237	0.00272978793069025	-0.0807608	-0.0317404	0.0592279328564227	-0.102792	-0.137644	-0.00244192	-0.122043	-0.102237	-0.133749	0.134248417322669	-0.121047	-0.142173	-0.0921411	-0.0405037	0.199511191932386	-0.137803	-0.0904575	0.0855440650833474	-0.0746282	-0.0329965	-0.0782676	0.147778622803028	-0.0880193	-0.0173172	-0.136329	-0.099727	-0.0952673	0.102354298367649	0.64124736345101	-0.106119	-0.0907251	-0.133946	-0.147018
B_01_HLA.DRA	-0.0589444	-0.0980985	-0.0892123	-0.0576172	-0.070166	-0.0522706	1	-0.0382642	0.252367779999134	-0.157197	0.512088067862777	0.0649479458859643	0.337985695042572	0.0336044405385773	-0.111535	-0.124739	-0.127744	-0.058437	-0.00692951	-0.137479	-0.0662976	-0.0724447	0.00489293153100442	0.0864612668033425	0.268071689150504	-0.211243	-0.114857	0.0345076061908971	0.152820316145652	0.164735330264254	0.452880148458118	0.0476205825104236	-0.0481635	-0.0889582	-0.0497851	-0.101512	0.0250438986908774	0.199896266150317	0.217836735569625	-0.0834392	-0.175331	0.019260346536882	-0.126206	0.0157837301861791	-0.0464533	-0.119771	-0.129641	-0.124559	9.40354581094402e-05
B_02_HLA.DQB1	-0.0745213	-0.133351	-0.110311	-0.0749403	-0.092232	-0.112387	-0.0382642	1	0.176915856298093	-0.167548	-0.0615759	0.0742494630817375	0.17024987789537	0.552124899099991	-0.1318	-0.0631086	-0.122569	-0.0808567	0.199447371142541	0.335718691531532	0.104768749101477	0.0324383888227218	-0.214384	-0.123653	-0.100298	-0.251063	-0.0263859	-0.0950232	-0.133063	-0.16467	-0.193162	0.171305695640549	-0.162372	-0.219517	-0.0496672	-0.107807	0.117963727659381	-0.03473	-0.0965852	-0.22172	-0.257314	-0.152868	-0.157555	-0.251373	-0.234453	-0.0817904	-0.174029	-0.22896	0.0623871926600839
B_03_CD3E	-0.0828305	-0.128845	-0.124913	-0.0787766	-0.0895664	-0.0903203	0.252367779999134	0.176915856298093	1	-0.188829	0.604228492464772	0.166293807198882	0.321582035360431	0.326119730962368	-0.0581957	-0.100366	0.0241102233785137	-0.0865994	0.19725359180811	0.172146405314814	0.116097556609146	-0.086373	-0.116179	-0.0375034	-0.0930279	-0.284204	-0.110538	-0.116405	-0.105058	-0.0671238	0.0476517978884401	-0.0925953	-0.121114	-0.204117	-0.116426	-0.120594	0.0114668177866098	0.0598642304482079	-0.0418225	-0.113895	-0.255017	-0.15991	-0.168445	-0.107712	-0.211384	0.00136883641313353	-0.10401	-0.204941	0.0468775154530168
B_04_PTMAP2	0.0184755487028543	0.0551378259187913	0.0821795127240241	0.0932018607534924	-0.0271604	0.0637173552610578	-0.157197	-0.167548	-0.188829	1	-0.10007	-0.0629585	-0.0161361	-0.105462	-0.0940649	0.760503331980691	-0.00987435	0.221280929368237	0.380313106109695	-0.0706479	-0.0141639	0.167720495930585	-0.0211298	-0.0543876	-0.203285	0.438287	-0.149926	-0.101036	-0.12313	-0.126087	-0.0180573	-0.168154	-0.133776	0.263605903268102	0.496178117436475	0.556379730142002	-0.0392053	0.202412985835684	0.033544318372905	-0.220742	-0.192733	-0.126149	-0.135038	-0.133061	-0.0887611	-0.16251	-0.0966793	-0.140413	-0.0792085
B_05_FYN	-0.0225859	-0.0458207	-0.0668119	-0.0327509	-0.0324091	0.00171152233191587	0.512088067862777	-0.0615759	0.604228492464772	-0.10007	1	0.211503909942675	0.482661860930869	-0.0413178	-0.0873272	-0.0869588	-0.0924924	-0.0441881	0.099389182964175	-0.00745069	0.0627204275025549	-0.0551538	-0.0430852	-0.0401485	0.0883917133914966	-0.140143	-0.104438	0.00271080980478229	0.0584136982010617	0.0622484041395434	0.160709520303964	-0.0702476	-0.0557507	-0.0825578	-0.0480387	-0.0592077	-0.0315977	0.0994908425859367	0.0166729178750065	-0.0819806	-0.162385	-0.0861439	-0.105942	-0.0274166	-0.108215	-0.108747	-0.102412	-0.158698	-0.0785682
Bn_06_GZMB	-0.0491345	-0.0354571	0.0722776309634334	-0.0325515	-0.0441588	-0.0313346	0.0649479458859643	0.0742494630817375	0.166293807198882	-0.0629585	0.211503909942675	1	0.198926819767986	0.0543949249728637	-0.16803	-0.14788	-0.174692	-0.0822201	0.0997577663438351	0.319604124302778	0.483154185797531	0.281994255947605	-0.0550203	-0.194064	-0.0191293	-0.191278	-0.158085	0.0830475456327428	-0.0271039	0.163141390124817	0.125852887807628	0.0689406172225046	-0.0646755	-0.078477	-0.037144	-0.00579018	-0.0941901	-0.0811031	0.139029738461022	0.16051419855889	-0.138306	0.139465077276157	-0.186143	0.221383760123385	-0.162344	-0.0924155	-0.0620717	-0.201121	-0.139609
CD4T_01_IL7R	-0.116649	-0.195291	-0.110774	-0.130108	-0.161278	-0.145964	0.337985695042572	0.17024987789537	0.321582035360431	-0.0161361	0.482661860930869	0.198926819767986	1	-0.105579	-0.260429	0.0440326576531904	-0.318226	-0.144625	0.646981811987774	0.0907150996355593	0.0423745294500234	0.0534766301937256	-0.0117799	0.232763045369161	0.219296978682652	-0.252524	0.0597806444832268	0.177170402082264	0.0607359375738168	-0.0304316	0.138138368548226	0.0853448609147151	-0.240296	-0.274793	-0.0375979	-0.0982148	-0.0890519	0.268544232253539	-0.0521416	-0.231091	-0.137829	0.08819510029338	-0.217774	-0.199344	-0.281561	-0.252434	-0.334357	-0.274993	0.140828027547289
CD4T_02_GNB2L1	-0.0763788	-0.111605	-0.110956	-0.0776662	-0.0967657	-0.110827	0.0336044405385773	0.552124899099991	0.326119730962368	-0.105462	-0.0413178	0.0543949249728637	-0.105579	1	-0.0260394	-0.121961	0.0885260382738199	-0.082006	-0.0669307	0.124928434622212	-0.0907065	0.299704736657564	-0.291571	-0.120151	-0.166844	-0.242338	-0.10958	-0.186406	-0.147405	-0.162425	-0.126336	-0.0271216	-0.168402	-0.204629	-0.0658901	-0.110642	0.176193808799161	-0.0633098	-0.0519029	-0.238376	-0.346361	-0.20032	-0.163334	-0.196801	-0.239822	0.00432015677462848	-0.0298537	-0.232263	0.229677417189443
CD4T_03_SCGB3A1	-0.0568553	-0.0805851	-0.0634155	-0.0371345	-0.0626602	-0.0751237	-0.111535	-0.1318	-0.0581957	-0.0940649	-0.0873272	-0.16803	-0.260429	-0.0260394	1	-0.0692124	0.217531023488491	-0.0575511	-0.24419	-0.160175	-0.203353	-0.0694787	0.115884505748565	-0.0218744	0.235849456447554	0.011048207817059	0.255092610790464	0.252658261781478	0.191211434991486	-0.0469676	-0.0506675	0.178973243335189	0.226199707235536	-0.0991997	-0.0712555	-0.0871387	-0.0549525	-0.103545	-0.126694	-0.125501	-0.100531	-0.095238	-0.0810307	-0.166471	0.114959921614468	-0.0377936	0.1349187315577	-0.06039	0.0933509893280357
CD4T_04_SNORD3A	-0.0107335	0.0182093381446117	0.0227212822071666	0.0344944476383467	0.0969954189896659	0.00272978793069025	-0.124739	-0.0631086	-0.100366	0.760503331980691	-0.0869588	-0.14788	0.0440326576531904	-0.121961	-0.0692124	1	0.101168577784272	-0.05712	0.528026380233239	-0.0393048	0.043578472849092	0.0446346058917657	0.0350744074484074	0.00128567245948054	-0.185625	0.384353883650094	-0.131071	-0.0271563	-0.0431758	-0.0576747	-0.0230823	-0.0328613	-0.110522	0.119123053002841	0.0896831070987054	0.15103850967495	-0.0734721	0.254036231285909	-0.0570669	-0.258072	-0.183281	-0.16812	-0.0771019	-0.170312	-0.0996518	-0.0699332	-0.122777	-0.0730705	-0.0748787
CD4T_05_SFTPB	-0.055639	-0.0764554	-0.0782152	-0.0480423	-0.0501818	-0.0807608	-0.127744	-0.122569	0.0241102233785137	-0.00987435	-0.0924924	-0.174692	-0.318226	0.0885260382738199	0.217531023488491	0.101168577784272	1	-0.0574648	-0.257661	-0.135536	-0.14228	-0.0642841	0.0630744515467723	0.003506213263223	-0.0510453	0.103352973900448	-0.114867	0.0450627473791239	0.366432945882461	0.212472229794385	-0.0932452	-0.0157137	0.214352780084617	-0.101835	-0.0952808	-0.0960268	-0.0724472	-0.187952	-0.105516	-0.212506	-0.145907	-0.12853	-0.0987267	-0.148165	-0.115729	0.101961906156131	0.359349678932112	-0.0844996	0.246509528297752
CD4T_06_ACSL5	-0.0208176	-0.0382855	-0.0276074	-0.0198896	-0.0291025	-0.0317404	-0.058437	-0.0808567	-0.0865994	0.221280929368237	-0.0441881	-0.0822201	-0.144625	-0.082006	-0.0575511	-0.05712	-0.0574648	1	-0.163413	-0.0979831	-0.145061	-0.027781	-0.162232	-0.0785948	-0.0562387	-0.110317	-0.0830639	-0.110152	-0.0718415	-0.0815826	-0.0801325	-0.103783	-0.0651538	-0.0844291	-0.0529592	-0.0416762	-0.0762876	-0.102386	-0.101762	-0.153058	-0.185478	-0.0836478	-0.0739398	-0.119133	-0.0972528	-0.0834861	-0.0627925	-0.124447	-0.120801
CD8T_01_CCL5	0.104551470066385	0.0596663193833171	-0.0104839	-0.0588541	-0.0668665	0.0592279328564227	-0.00692951	0.199447371142541	0.19725359180811	0.380313106109695	0.099389182964175	0.0997577663438351	0.646981811987774	-0.0669307	-0.24419	0.528026380233239	-0.257661	-0.163413	1	0.270211122088895	0.172969601748281	0.0182820451739115	-0.119933	0.231745348825226	-0.181596	0.0197899556018514	-0.135133	-0.0228111	-0.0873059	-0.215374	-0.00878854	-0.0881157	-0.300964	-0.112736	0.110912132283889	0.114003132444483	-0.144462	0.23583906641836	-0.161671	-0.336874	-0.290645	-0.118495	-0.232048	-0.282149	-0.127988	-0.215609	-0.370708	-0.321612	-0.00115341
CD8T_02_GZMB	-0.0727216	-0.0966327	0.00592577192191462	-0.068726	-0.0545925	-0.102792	-0.137479	0.335718691531532	0.172146405314814	-0.0706479	-0.00745069	0.319604124302778	0.0907150996355593	0.124928434622212	-0.160175	-0.0393048	-0.135536	-0.0979831	0.270211122088895	1	0.703843108250984	-0.00734394	-0.273	-0.155597	-0.272402	-0.0949336	-0.094886	-0.200659	-0.16247	-0.197192	-0.17981	-0.00407985	-0.216894	-0.104462	0.0202611482672213	0.0104067289446868	-0.103992	-0.127458	-0.192028	-0.128443	-0.0419436	-0.231621	-0.100986	-0.278832	-0.231476	0.130880053180306	-0.216763	-0.237418	-0.113031
CD8T_03_MKI67	-0.135831	-0.0703573	0.254891452826389	-0.0504307	0.0922419096469041	-0.137644	-0.0662976	0.104768749101477	0.116097556609146	-0.0141639	0.0627204275025549	0.483154185797531	0.0423745294500234	-0.0907065	-0.203353	0.043578472849092	-0.14228	-0.145061	0.172969601748281	0.703843108250984	1	-0.0206786	-0.0919338	-0.116368	-0.327906	0.161246076330329	-0.179117	-0.28531	-0.233026	-0.17258	-0.0940972	-0.142699	-0.15257	0.231114440742732	0.00857985050638269	0.16775773997242	0.0320313794865865	-0.176138	-0.0509283	-0.0277592	0.0554739335756713	-0.209117	-0.0195842	-0.144161	-0.0923418	0.405484144194004	-0.0643877	0.0456502570558746	-0.267403
CD8T_04_HLA.B	0.007029227299697	-0.00248579	0.000213967599059666	-0.00987991	-0.0262825	-0.00244192	-0.0724447	0.0324383888227218	-0.086373	0.167720495930585	-0.0551538	0.281994255947605	0.0534766301937256	0.299704736657564	-0.0694787	0.0446346058917657	-0.0642841	-0.027781	0.0182820451739115	-0.00734394	-0.0206786	1	-0.160709	-0.0902259	-0.0690521	-0.0226953	-0.0698093	-0.0417012	-0.0882075	-0.0969917	-0.0782444	-0.123622	-0.0805022	-0.0231657	0.0422640902179686	0.0389784350766309	0.00155330396375687	-0.0433934	-0.0883778	-0.125376	-0.152582	-0.094763	-0.0796893	0.00465722774964866	-0.0901061	-0.0726869	-0.0765984	-0.115592	-0.0213152
cDC_01_CLEC10A	-0.129069	-0.146316	0.0503829486853683	-0.025328	-0.109889	-0.122043	0.00489293153100442	-0.214384	-0.116179	-0.0211298	-0.0430852	-0.0550203	-0.0117799	-0.291571	0.115884505748565	0.0350744074484074	0.0630744515467723	-0.162232	-0.119933	-0.273	-0.0919338	-0.160709	1	0.472504100523128	0.0410595978321443	-0.118074	0.0631168733570199	0.148565918865416	0.18546110068137	0.233133980843849	0.0158106759259492	0.0302173484728343	0.0177219036304804	-0.15726	-0.121453	-0.0573982	0.086164443769356	-0.0218332	0.160164946757449	0.215030175563556	0.320278206978387	0.378035905420138	-0.00392437	0.213409311408173	0.171116128939137	-0.0140059	0.0388460009137904	0.41302625289551	-0.0416482
cDC_02_CD207	-0.0853928	-0.132442	-0.0804573	-0.0514655	-0.0946017	-0.102237	0.0864612668033425	-0.123653	-0.0375034	-0.0543876	-0.0401485	-0.194064	0.232763045369161	-0.120151	-0.0218744	0.00128567245948054	0.003506213263223	-0.0785948	0.231745348825226	-0.155597	-0.116368	-0.0902259	0.472504100523128	1	0.0262930784957056	-0.170699	0.204166530839704	0.106872591379261	-0.0395996	0.110260220999861	0.0362576861188949	0.0866642767216468	-0.0449519	-0.156717	-0.0714432	-0.122065	-0.0636071	0.223524019399183	0.0925127621220563	-0.00363721	0.0430938420693675	-0.0209756	0.094197473442456	-0.112522	0.12796918019778	-0.169394	-0.0701366	0.116898628526148	-0.024562
Endothelial_01_FCN3	-0.116308	-0.169038	-0.0729696	-0.0850798	-0.120364	-0.133749	0.268071689150504	-0.100298	-0.0930279	-0.203285	0.0883917133914966	-0.0191293	0.219296978682652	-0.166844	0.235849456447554	-0.185625	-0.0510453	-0.0562387	-0.181596	-0.272402	-0.327906	-0.0690521	0.0410595978321443	0.0262930784957056	1	-0.0244619	0.423053620624253	0.727724795046205	0.490002455448279	0.433439256586564	0.282613635929705	0.321605725797959	0.478614124387913	0.00134194097740042	-0.0869963	-0.168746	0.101379388276859	0.152788558690803	0.254351487438582	0.0729771629945698	0.0201912592282544	0.241973977756591	-0.123953	0.155060366587517	0.0111901971490218	-0.140037	0.165273204256247	-0.0560305	0.367073055848231
Endothelial_02_PTMAP2	0.125330670179389	0.240014310764777	0.48213613883072	0.0642103480445832	0.103590275835613	0.134248417322669	-0.211243	-0.251063	-0.284204	0.438287	-0.140143	-0.191278	-0.252524	-0.242338	0.011048207817059	0.384353883650094	0.103352973900448	-0.110317	0.0197899556018514	-0.0949336	0.161246076330329	-0.0226953	-0.118074	-0.170699	-0.0244619	1	-0.0785289	-0.0526484	-0.0170315	-0.0609165	0.114978728977832	-0.200103	0.206926851420535	0.844517344342421	0.324686264070219	0.429961098184225	-0.0623016	0.17273188138566	0.0275044018632991	-0.163293	-0.108447	-0.159596	0.28113442848917	-0.119316	0.291393922035502	-0.0765937	0.218605020446302	0.253747952184137	-0.10923
Endothelial_03_VCAM1	-0.0824234	-0.148503	-0.124748	-0.0805676	-0.0981149	-0.121047	-0.114857	-0.0263859	-0.110538	-0.149926	-0.104438	-0.158085	0.0597806444832268	-0.10958	0.255092610790464	-0.131071	-0.114867	-0.0830639	-0.135133	-0.094886	-0.179117	-0.0698093	0.0631168733570199	0.204166530839704	0.423053620624253	-0.0785289	1	0.537680981020652	0.181228121131009	0.0558334350711715	-0.0827425	0.689152998807716	0.151201677753276	-0.11708	0.0180712279023378	-0.0226164	0.200305873649335	0.217181982070626	0.112633918337878	0.0531960851144136	0.348389630260791	0.106684137910422	0.0643214054675206	-0.0904322	-0.0273013	-0.0750136	-0.0124377	0.0324971568959811	0.226531719419263
Endothelial_04_DKK2	-0.110039	-0.182411	-0.110243	-0.108023	-0.129631	-0.142173	0.0345076061908971	-0.0950232	-0.116405	-0.101036	0.00271080980478229	0.0830475456327428	0.177170402082264	-0.186406	0.252658261781478	-0.0271563	0.0450627473791239	-0.110152	-0.0228111	-0.200659	-0.28531	-0.0417012	0.148565918865416	0.106872591379261	0.727724795046205	-0.0526484	0.537680981020652	1	0.506504814736527	0.469720006451767	0.140624511421172	0.466598382706928	0.328878953877036	-0.0779725	-0.00504545	-0.114428	0.0327582962916679	0.191548449687765	0.186955060068961	0.00288211704558946	-0.114507	0.448204550983346	-0.121036	0.054567507853963	-0.0263713	-0.202046	0.142657980757505	-0.0890156	0.500645263993344
Endothelial_05_IL1RL1	-0.0708859	-0.124537	-0.107286	-0.0692899	-0.0843809	-0.0921411	0.152820316145652	-0.133063	-0.105058	-0.12313	0.0584136982010617	-0.0271039	0.0607359375738168	-0.147405	0.191211434991486	-0.0431758	0.366432945882461	-0.0718415	-0.0873059	-0.16247	-0.233026	-0.0882075	0.18546110068137	-0.0395996	0.490002455448279	-0.0170315	0.181228121131009	0.506504814736527	1	0.214960544117994	0.0881586902850575	0.131038200556642	0.273507773397313	-0.195465	-0.107751	-0.130346	-0.0243613	-0.157379	-0.101103	-0.07845	-0.00143727	0.314996882393349	-0.164426	0.0427277604946816	-0.094195	-0.11825	-0.0173187	-0.119459	0.42860385449334
Endothelial_06_CD68	-0.0785977	-0.0835897	-0.00476255	0.0303447224483506	-0.0821672	-0.0405037	0.164735330264254	-0.16467	-0.0671238	-0.126087	0.0622484041395434	0.163141390124817	-0.0304316	-0.162425	-0.0469676	-0.0576747	0.212472229794385	-0.0815826	-0.215374	-0.197192	-0.17258	-0.0969917	0.233133980843849	0.110260220999861	0.433439256586564	-0.0609165	0.0558334350711715	0.469720006451767	0.214960544117994	1	0.27600400614088	0.217548582517073	0.15680203756739	-0.0191573	-0.0943824	-0.0984437	0.00605968722797295	0.171911788254217	0.680335866706525	0.29244545193065	0.0168452454033909	0.141605730338577	-0.0241865	0.518479911976725	-0.0815358	-0.0697776	0.150412478306421	0.00114508580009551	0.113440913205407
Endothelial_07_NOTCH3	0.0374241872791238	0.133230955350112	0.292426883342935	0.258727025525466	-0.0485703	0.199511191932386	0.452880148458118	-0.193162	0.0476517978884401	-0.0180573	0.160709520303964	0.125852887807628	0.138138368548226	-0.126336	-0.0506675	-0.0230823	-0.0932452	-0.0801325	-0.00878854	-0.17981	-0.0940972	-0.0782444	0.0158106759259492	0.0362576861188949	0.282613635929705	0.114978728977832	-0.0827425	0.140624511421172	0.0881586902850575	0.27600400614088	1	-0.0139071	-0.00137457	0.239877918158731	-0.0010595	0.0245577508050801	-0.00195467	0.432518049271524	0.251006138924542	0.0176280425011077	-0.0478954	0.105701790362798	-0.133992	0.120174101741216	0.269825151865449	-0.161988	-0.160931	-0.188617	-0.126527
Endothelial_08_CCL21	-0.102381	-0.180887	-0.154954	-0.100076	-0.121872	-0.137803	0.0476205825104236	0.171305695640549	-0.0925953	-0.168154	-0.0702476	0.0689406172225046	0.0853448609147151	-0.0271216	0.178973243335189	-0.0328613	-0.0157137	-0.103783	-0.0881157	-0.00407985	-0.142699	-0.123622	0.0302173484728343	0.0866642767216468	0.321605725797959	-0.200103	0.689152998807716	0.466598382706928	0.131038200556642	0.217548582517073	-0.0139071	1	0.0844337076645775	-0.280804	-0.0538842	-0.177268	-0.0367886	0.166478061817286	0.196379526786592	0.0502184394698832	0.169683784268089	0.234432151942508	-0.0483591	0.0313758819356265	-0.116494	-0.183446	-0.0192485	-0.123672	0.107866705681087
Endothelial_09_S100A14	-0.0636658	-0.115204	-0.0963583	-0.0622324	-0.0757863	-0.0904575	-0.0481635	-0.162372	-0.121114	-0.133776	-0.0557507	-0.0646755	-0.240296	-0.168402	0.226199707235536	-0.110522	0.214352780084617	-0.0651538	-0.300964	-0.216894	-0.15257	-0.0805022	0.0177219036304804	-0.0449519	0.478614124387913	0.206926851420535	0.151201677753276	0.328878953877036	0.273507773397313	0.15680203756739	-0.00137457	0.0844337076645775	1	0.293377089068273	0.0417486225108904	-0.0466206	0.169272610186561	0.00309601068220495	0.166675758282335	0.121486308989701	0.0587160529583996	0.134747666126727	0.0271324629052336	0.138497368854919	0.32314842981654	0.126625480471803	0.630375428731489	0.220319971025206	-0.0404433
Fibroblast_01_Myo_HIGD1B	-0.0499132	0.137874928203463	0.495454828802117	0.219112919480519	0.118140143046396	0.0855440650833474	-0.0889582	-0.219517	-0.204117	0.263605903268102	-0.0825578	-0.078477	-0.274793	-0.204629	-0.0991997	0.119123053002841	-0.101835	-0.0844291	-0.112736	-0.104462	0.231114440742732	-0.0231657	-0.15726	-0.156717	0.00134194097740042	0.844517344342421	-0.11708	-0.0779725	-0.195465	-0.0191573	0.239877918158731	-0.280804	0.293377089068273	1	0.399637928295151	0.528119881946982	0.125398761107943	0.142687122104827	0.182482502666571	-0.0147389	-0.0152861	-0.100397	0.345487213493731	0.0070861811302607	0.333842325321535	0.0576227567244399	0.234648343521482	0.361841142857321	-0.202913
Fibroblast_02_Myo_COL10A1	-0.0513721	-0.0788308	-0.00567997	-0.0479588	-0.0554301	-0.0746282	-0.0497851	-0.0496672	-0.116426	0.496178117436475	-0.0480387	-0.037144	-0.0375979	-0.0658901	-0.0712555	0.0896831070987054	-0.0952808	-0.0529592	0.110912132283889	0.0202611482672213	0.00857985050638269	0.0422640902179686	-0.121453	-0.0714432	-0.0869963	0.324686264070219	0.0180712279023378	-0.00504545	-0.107751	-0.0943824	-0.0010595	-0.0538842	0.0417486225108904	0.399637928295151	1	0.879208503055973	0.0997513815424572	0.128078730794833	0.214704817329561	-0.0374037	0.0859496537704884	-0.0198201	0.0846434460870497	-0.0511319	0.0139278602296249	-0.0578743	0.00299335371230886	-0.0135338	0.0763991013154862
Fibroblast_03_Myo_MKI67	-0.0413366	0.00974084315197686	0.229326282129648	0.0012660944603615	-0.0195424	-0.0329965	-0.101512	-0.107807	-0.120594	0.556379730142002	-0.0592077	-0.00579018	-0.0982148	-0.110642	-0.0871387	0.15103850967495	-0.0960268	-0.0416762	0.114003132444483	0.0104067289446868	0.16775773997242	0.0389784350766309	-0.0573982	-0.122065	-0.168746	0.429961098184225	-0.0226164	-0.114428	-0.130346	-0.0984437	0.0245577508050801	-0.177268	-0.0466206	0.528119881946982	0.879208503055973	1	0.32542019349527	-0.00116212	0.298397856024105	-0.0160739	0.147731557971432	-0.0703687	-0.00939822	0.033914699385739	0.00282719710179462	0.0909003326344495	-0.0630911	0.0163858253240179	0.00770422828873715
Fibroblast_04_Alveolar_DPT	-0.0587735	-0.100197	-0.0703525	-0.0506962	-0.0626405	-0.0782676	0.0250438986908774	0.117963727659381	0.0114668177866098	-0.0392053	-0.0315977	-0.0941901	-0.0890519	0.176193808799161	-0.0549525	-0.0734721	-0.0724472	-0.0762876	-0.144462	-0.103992	0.0320313794865865	0.00155330396375687	0.086164443769356	-0.0636071	0.101379388276859	-0.0623016	0.200305873649335	0.0327582962916679	-0.0243613	0.00605968722797295	-0.00195467	-0.0367886	0.169272610186561	0.125398761107943	0.0997513815424572	0.32542019349527	1	0.011049696542466	0.425540868671884	-0.0629031	0.27979637219747	-0.0656828	-0.0947537	0.137341040249881	0.0566425235676794	0.448965819275515	0.0755811382814697	0.192216325583342	-0.00136689
Fibroblast_05_Alveolar_MYH11	0.0335965280004561	0.0761621999852315	0.0925165310006807	0.196678606182713	-0.0897632	0.147778622803028	0.199896266150317	-0.03473	0.0598642304482079	0.202412985835684	0.0994908425859367	-0.0811031	0.268544232253539	-0.0633098	-0.103545	0.254036231285909	-0.187952	-0.102386	0.23583906641836	-0.127458	-0.176138	-0.0433934	-0.0218332	0.223524019399183	0.152788558690803	0.17273188138566	0.217181982070626	0.191548449687765	-0.157379	0.171911788254217	0.432518049271524	0.166478061817286	0.00309601068220495	0.142687122104827	0.128078730794833	-0.00116212	0.011049696542466	1	0.324403257282603	0.0118866394222876	-0.198135	-0.102764	0.047020893124304	-0.0573443	0.152530142538259	-0.216878	-0.100073	-0.0923966	-0.0280893
Fibroblast_06_Alveolar_MS4A7	-0.0521297	-0.0681634	0.0625090127131151	-0.101139	-0.0477496	-0.0880193	0.217836735569625	-0.0965852	-0.0418225	0.033544318372905	0.0166729178750065	0.139029738461022	-0.0521416	-0.0519029	-0.126694	-0.0570669	-0.105516	-0.101762	-0.161671	-0.192028	-0.0509283	-0.0883778	0.160164946757449	0.0925127621220563	0.254351487438582	0.0275044018632991	0.112633918337878	0.186955060068961	-0.101103	0.680335866706525	0.251006138924542	0.196379526786592	0.166675758282335	0.182482502666571	0.214704817329561	0.298397856024105	0.425540868671884	0.324403257282603	1	0.282985839283066	0.106560765641291	0.017820536816463	0.0949645695324255	0.538244108227211	-0.0255365	0.0830625368916334	0.0987361386576784	0.18361911457863	-0.0915979
Macrophage_01_LGMN	-0.0441754	0.00542569243926431	0.152077077105304	0.0311995605340841	-0.0262895	-0.0173172	-0.0834392	-0.22172	-0.113895	-0.220742	-0.0819806	0.16051419855889	-0.231091	-0.238376	-0.125501	-0.258072	-0.212506	-0.153058	-0.336874	-0.128443	-0.0277592	-0.125376	0.215030175563556	-0.00363721	0.0729771629945698	-0.163293	0.0531960851144136	0.00288211704558946	-0.07845	0.29244545193065	0.0176280425011077	0.0502184394698832	0.121486308989701	-0.0147389	-0.0374037	-0.0160739	-0.0629031	0.0118866394222876	0.282985839283066	1	0.418459120587348	0.292761228784281	0.0943056116724969	0.741245713186136	0.0614995960406985	0.147840227544196	0.0811190292349265	0.14806330941366	-0.12672
Macrophage_02_FCN1	-0.15959	-0.139896	-0.0185604	0.0153639601419829	0.102142432145533	-0.136329	-0.175331	-0.257314	-0.255017	-0.192733	-0.162385	-0.138306	-0.137829	-0.346361	-0.100531	-0.183281	-0.145907	-0.185478	-0.290645	-0.0419436	0.0554739335756713	-0.152582	0.320278206978387	0.0430938420693675	0.0201912592282544	-0.108447	0.348389630260791	-0.114507	-0.00143727	0.0168452454033909	-0.0478954	0.169683784268089	0.0587160529583996	-0.0152861	0.0859496537704884	0.147731557971432	0.27979637219747	-0.198135	0.106560765641291	0.418459120587348	1	0.100898686981446	0.19929093755832	0.245055111421402	0.0697216096484566	0.314105121153737	-0.015798	0.288549192059539	-0.137886
Macrophage_03_MARCO	-0.0839326	-0.137278	-0.122632	-0.078991	-0.072738	-0.099727	0.019260346536882	-0.152868	-0.15991	-0.126149	-0.0861439	0.139465077276157	0.08819510029338	-0.20032	-0.095238	-0.16812	-0.12853	-0.0836478	-0.118495	-0.231621	-0.209117	-0.094763	0.378035905420138	-0.0209756	0.241973977756591	-0.159596	0.106684137910422	0.448204550983346	0.314996882393349	0.141605730338577	0.105701790362798	0.234432151942508	0.134747666126727	-0.100397	-0.0198201	-0.0703687	-0.0656828	-0.102764	0.017820536816463	0.292761228784281	0.100898686981446	1	-0.104862	0.400780827890054	-0.0815755	0.0112246581086688	0.114051330070818	0.25383198334799	0.190050883074596
Macrophage_04_SPP1	-0.0700158	-0.11601	-0.0823307	-0.0515392	-0.0815854	-0.0952673	-0.126206	-0.157555	-0.168445	-0.135038	-0.105942	-0.186143	-0.217774	-0.163334	-0.0810307	-0.0771019	-0.0987267	-0.0739398	-0.232048	-0.100986	-0.0195842	-0.0796893	-0.00392437	0.094197473442456	-0.123953	0.28113442848917	0.0643214054675206	-0.121036	-0.164426	-0.0241865	-0.133992	-0.0483591	0.0271324629052336	0.345487213493731	0.0846434460870497	-0.00939822	-0.0947537	0.047020893124304	0.0949645695324255	0.0943056116724969	0.19929093755832	-0.104862	1	-0.0148151	0.0864808150338411	-0.012026	-0.00672891	0.701093521311854	-0.152338
Macrophage_05_CSTB	0.121231609469885	0.122757583438637	0.0364259062756818	-0.00973566	0.0158716032692989	0.102354298367649	0.0157837301861791	-0.251373	-0.107712	-0.133061	-0.0274166	0.221383760123385	-0.199344	-0.196801	-0.166471	-0.170312	-0.148165	-0.119133	-0.282149	-0.278832	-0.144161	0.00465722774964866	0.213409311408173	-0.112522	0.155060366587517	-0.119316	-0.0904322	0.054567507853963	0.0427277604946816	0.518479911976725	0.120174101741216	0.0313758819356265	0.138497368854919	0.0070861811302607	-0.0511319	0.033914699385739	0.137341040249881	-0.0573443	0.538244108227211	0.741245713186136	0.245055111421402	0.400780827890054	-0.0148151	1	0.0784766416178816	0.12643761694359	0.116723833786598	0.23216838684375	-0.16653
Macrophage_06_C3	0.569053489040427	0.62952567396235	0.31181276415133	0.321244200847711	-0.00767096	0.64124736345101	-0.0464533	-0.234453	-0.211384	-0.0887611	-0.108215	-0.162344	-0.281561	-0.239822	0.114959921614468	-0.0996518	-0.115729	-0.0972528	-0.127988	-0.231476	-0.0923418	-0.0901061	0.171116128939137	0.12796918019778	0.0111901971490218	0.291393922035502	-0.0273013	-0.0263713	-0.094195	-0.0815358	0.269825151865449	-0.116494	0.32314842981654	0.333842325321535	0.0139278602296249	0.00282719710179462	0.0566425235676794	0.152530142538259	-0.0255365	0.0614995960406985	0.0697216096484566	-0.0815755	0.0864808150338411	0.0784766416178816	1	-0.0528901	0.197142456164685	0.175029160533037	-0.261207
Macrophage_07_IGKC	-0.0803993	-0.121708	-0.0979178	-0.0585294	-0.0640831	-0.106119	-0.119771	-0.0817904	0.00136883641313353	-0.16251	-0.108747	-0.0924155	-0.252434	0.00432015677462848	-0.0377936	-0.0699332	0.101961906156131	-0.0834861	-0.215609	0.130880053180306	0.405484144194004	-0.0726869	-0.0140059	-0.169394	-0.140037	-0.0765937	-0.0750136	-0.202046	-0.11825	-0.0697776	-0.161988	-0.183446	0.126625480471803	0.0576227567244399	-0.0578743	0.0909003326344495	0.448965819275515	-0.216878	0.0830625368916334	0.147840227544196	0.314105121153737	0.0112246581086688	-0.012026	0.12643761694359	-0.0528901	1	0.303540017269191	0.265737791166034	-0.0827059
Macrophage_08_SCGB3A2	-0.0623611	-0.104376	-0.0818933	-0.0560787	-0.0704688	-0.0907251	-0.129641	-0.174029	-0.10401	-0.0966793	-0.102412	-0.0620717	-0.334357	-0.0298537	0.1349187315577	-0.122777	0.359349678932112	-0.0627925	-0.370708	-0.216763	-0.0643877	-0.0765984	0.0388460009137904	-0.0701366	0.165273204256247	0.218605020446302	-0.0124377	0.142657980757505	-0.0173187	0.150412478306421	-0.160931	-0.0192485	0.630375428731489	0.234648343521482	0.00299335371230886	-0.0630911	0.0755811382814697	-0.100073	0.0987361386576784	0.0811190292349265	-0.015798	0.114051330070818	-0.00672891	0.116723833786598	0.197142456164685	0.303540017269191	1	0.265644082737826	-0.0409869
Macrophage_09_MKI67	-0.11932	-0.160169	-0.0702948	-0.0414972	-0.0748873	-0.133946	-0.124559	-0.22896	-0.204941	-0.140413	-0.158698	-0.201121	-0.274993	-0.232263	-0.06039	-0.0730705	-0.0844996	-0.124447	-0.321612	-0.237418	0.0456502570558746	-0.115592	0.41302625289551	0.116898628526148	-0.0560305	0.253747952184137	0.0324971568959811	-0.0890156	-0.119459	0.00114508580009551	-0.188617	-0.123672	0.220319971025206	0.361841142857321	-0.0135338	0.0163858253240179	0.192216325583342	-0.0923966	0.18361911457863	0.14806330941366	0.288549192059539	0.25383198334799	0.701093521311854	0.23216838684375	0.175029160533037	0.265737791166034	0.265644082737826	1	-0.191426
Mast_01_GNB2L1	-0.0980032	-0.133245	-0.115123	-0.106577	-0.119739	-0.147018	9.40354581094402e-05	0.0623871926600839	0.0468775154530168	-0.0792085	-0.0785682	-0.139609	0.140828027547289	0.229677417189443	0.0933509893280357	-0.0748787	0.246509528297752	-0.120801	-0.00115341	-0.113031	-0.267403	-0.0213152	-0.0416482	-0.024562	0.367073055848231	-0.10923	0.226531719419263	0.500645263993344	0.42860385449334	0.113440913205407	-0.126527	0.107866705681087	-0.0404433	-0.202913	0.0763991013154862	0.00770422828873715	-0.00136689	-0.0280893	-0.0915979	-0.12672	-0.137886	0.190050883074596	-0.152338	-0.16653	-0.261207	-0.0827059	-0.0409869	-0.191426	1
Mast_02_CHIT1	-0.049019	-0.0813913	-0.0568705	-0.0478446	-0.0575704	-0.0723265	-0.0538828	-0.0721778	-0.10226	-0.126049	-0.0537891	0.259211967820858	-0.0117362	-0.114086	-0.0658894	-0.123876	-0.0736736	-0.0504524	-0.140792	-0.130809	-0.110796	-0.0630025	0.162536076858582	-0.0487891	0.256569712487171	-0.171633	0.0658132549893282	0.311831180685538	0.04117068581013	0.639614495692889	-0.0811165	0.389893389890033	0.180976184900365	-0.152042	-0.0660318	-0.0773972	-0.0372822	-0.0295974	0.586333163198579	0.421709201030067	0.0987419714389224	0.372871872766669	-0.0684907	0.601492284967992	-0.109676	0.00480253136173961	0.245805693145467	0.0656913118652967	0.102025546413081
Mast_03_PBK	0.0288256190208649	0.0527890694137764	0.25014614266857	-0.0704796	-0.0658559	-0.0148972	0.00889325562614675	-0.104228	-0.139255	-0.109717	-0.126637	-0.0436976	-0.111672	-0.131487	0.144757627042109	-0.0730591	0.0901530384313723	-0.0762716	-0.153998	-0.0855658	0.0391272875590709	-0.0777591	0.480921743965451	0.0954575936263491	-0.0896973	0.158625191872336	-0.0693859	-0.140558	0.0908161652293684	-0.0560479	-0.0337656	-0.0835458	-0.0137689	0.0303000476883319	-0.06388	-0.0219263	-0.115093	0.0151554851765124	-0.0634508	0.12418197321224	0.194140512888685	-0.0163844	0.0368505743870966	-0.115928	0.138546399382436	0.0139307446979014	0.133274870289488	0.149929459370994	0.038752319349506
Neurophil_01_GOS2	-0.0447086	0.17003947853451	0.0187514382355841	0.16599434839107	0.80152517261927	0.0529025346403337	-0.0604467	-0.20251	-0.165045	-0.0682358	-0.0198417	-0.0918261	-0.268607	-0.192821	-0.116691	0.0259862807060737	-0.0534418	-0.0786014	-0.232583	-0.1316	-0.0369583	-0.0775884	-0.153243	-0.127644	-0.134432	0.0854158545357322	-0.0663636	-0.192061	-0.0987215	-0.0235153	-0.0335382	-0.113719	-0.0594987	0.143070752114358	-0.0535888	-0.0278846	-0.118266	-0.110175	-0.0614436	0.320824833129674	0.34801223483679	-0.074926	0.150077447006925	0.164474103349666	-0.0521971	-0.0826098	-0.0802081	-0.0231253	-0.137745
NK_01_FGFBP2	-0.0855138	-0.128959	-0.121858	-0.0453434	-0.0283942	-0.106789	-0.160145	-0.0320299	-0.215321	0.00320339734916566	-0.127401	-0.224766	0.301966138497168	-0.191833	0.0132928126466316	0.0969464196053915	0.180729179615118	-0.104433	0.297266176982587	0.0733214114805764	-0.114068	-0.0971913	-0.00661798	0.143117838675589	0.0317421040409558	-0.00880556	0.273876604264951	0.0448125574948647	0.169917469691235	0.000890764043146651	-0.173267	0.293612721918643	-0.0426929	-0.170576	0.00363009100663862	-0.0500843	-0.152234	-0.168675	-0.211891	-0.294453	0.319865155616396	-0.0506546	0.000829305982324103	-0.257833	-0.144093	-0.195876	-0.133685	-0.0888607	0.0250116622046572
pDC_03_GZMB	-0.109367	-0.100933	0.00832391350570762	-0.0631625	0.0938007829284137	-0.12193	-0.0673696	0.00958931250817771	0.00483103344572765	-0.226911	-0.0150292	0.533391218315115	0.102923845470968	-0.129891	-0.122466	-0.143273	-0.0199543	-0.121111	0.107579658328994	0.381741133626773	0.54298908018563	-0.122914	0.0766361641895205	-0.0702516	-0.114014	-0.210148	-0.0501333	-0.0867716	0.145490657245372	-0.0604263	0.0268863963941074	-0.0811507	-0.119352	-0.176384	-0.138023	-0.122327	-0.142966	-0.26932	-0.19855	0.0644639857588376	0.326226871113839	-0.0117407	0.0164167991888747	-0.119714	-0.137519	0.163783336121483	-0.176862	-0.0500422	-0.0714647
Plasma_01_IGHA_MZB1	-0.0808214	-0.1352	-0.0774974	-0.0796342	-0.0955792	-0.119319	-0.0100023	0.274530855086513	0.138755616588301	-0.170528	-0.0853946	0.329450981030158	0.0294079475079507	0.307528019810181	-0.123787	-0.206141	-0.120504	-0.0823829	0.0224970938439353	0.722606279280317	0.37614274939042	0.205840081237514	-0.211277	-0.148545	-0.0307348	-0.196393	-0.0721483	-0.0385466	-0.0484396	-0.0516697	0.00457411781237732	-0.0614927	-0.0718777	-0.142647	-0.10381	-0.0946113	0.097683324185692	-0.119891	-0.0283549	-0.0242511	-0.118026	-0.0504477	-0.148191	-0.0558461	-0.19678	0.00247281758195094	-0.0864201	-0.197912	-0.0536351
Plasma_02_IGHA_IGLC3	-0.062655	-0.101482	-0.0415362	-0.0665542	-0.0788527	-0.0940683	-0.0108937	0.275903812709863	0.0968037646872574	-0.138799	-0.0827305	0.318298258452361	-0.00843321	0.279562370612202	-0.108354	-0.16269	-0.0897716	-0.0688694	0.0453159701384463	0.800040261286554	0.447287614588262	0.0824524560326301	-0.178282	-0.134781	-0.0991947	-0.155976	-0.0920719	-0.0376021	-0.0195209	-0.0913496	-0.0147584	-0.0128417	-0.124393	-0.130569	-0.0769836	-0.0700918	0.0564462361956812	-0.123317	-0.0855701	-0.0794135	-0.149563	-0.0305314	-0.156208	-0.121729	-0.165996	-0.0186534	-0.137721	-0.203609	-0.0157681
Plasma_03_IGHA_GUSBP11	-0.0534928	-0.0884033	-0.0809614	-0.0522884	-0.0636766	-0.0535196	0.603747899015533	-0.0849301	0.220069086901513	-0.14164	0.17533503984844	0.0859017077591559	0.302157394165346	-0.0183863	-0.104249	-0.139969	-0.116472	-0.0537392	0.0155409594231555	-0.138361	-0.152747	-0.0527884	-0.0347395	0.0264123175315148	0.287458548853381	-0.205735	-0.0457995	0.0468561112933895	0.0583934847826038	0.0962618667016971	0.589945436495379	-0.0116902	-0.0553668	-0.0761818	-0.0661919	-0.0987528	-0.00162803	0.14778613259061	0.171026174342607	0.0368217536778014	-0.0357728	0.124888133126432	-0.087275	0.0750178740078082	-0.109859	-0.0835516	-0.11552	-0.144493	-0.0384714
Plasma_04_IGHA_VPS13D	-0.0555364	-0.0944389	-0.0840544	-0.054286	-0.0661092	-0.0643564	0.635081068405091	-0.0888984	0.22180941311715	-0.140602	0.213549617044764	0.000437495106694573	0.296006042547961	-0.028356	-0.103766	-0.134029	-0.11421	-0.0554294	0.000276922501428664	-0.147095	-0.150353	-0.066191	-0.047006	0.0307115376270641	0.312174516172386	-0.187815	-0.039081	-0.0186495	0.0467149155963759	0.14234590246027	0.523491201024654	-0.0961917	-0.033591	-0.0695684	-0.0644096	-0.0711361	0.077913171746152	0.167984472082664	0.238582155893359	0.0777767354032533	0.00829499578224806	-0.0177602	-0.0867756	0.114098957230591	-0.115037	-0.0395821	-0.0979185	-0.121372	-0.0372089
Plasma_05_IGHG_IGHGP	-0.0976329	-0.0858706	0.127460847493801	-0.0827735	-0.110717	-0.128911	-0.02679	0.15242575937703	0.157167204903516	-0.0689713	-0.120871	0.373058827660679	-0.0581264	0.443257557117316	-0.00759505	-0.152504	-0.030612	-0.102992	-0.019181	0.539493041209567	0.341165764926755	0.5691990785186	-0.257741	-0.16792	-0.132102	-0.13288	-0.0809827	-0.0837271	-0.141516	-0.161212	0.0445640604067695	-0.0949275	-0.167617	-0.053419	-0.0188636	0.0377021381386279	0.0505240217427425	-0.121016	-0.0942483	-0.0979458	-0.199067	-0.128675	-0.180853	-0.094991	-0.152249	0.0377202753602223	-0.146113	-0.252732	0.13884851874741
Plasma_06_IGHG_SFTPB	-0.0364096	-0.0516435	-0.00637079	-0.033157	-0.0422935	-0.0542155	-0.0850567	-0.0798237	0.0228172309427867	0.0442952495598501	-0.0658795	-0.0901066	-0.184353	0.165759180149743	0.115633415506145	0.00419840975120805	0.474215372843858	-0.0334623	-0.15892	-0.0899922	0.0288911262047676	0.0319970658847282	-0.147124	-0.0671033	-0.122535	0.17596812741002	-0.0906417	-0.0987132	-0.0355249	-0.0608368	-0.0768591	-0.100996	-0.0463968	0.0213899803141408	-0.0556074	-0.0428236	-0.0399714	-0.0482104	-0.117872	-0.17812	-0.203103	-0.108488	-0.0923201	-0.122816	-0.105893	0.259963370136476	0.629767980386844	-0.0048516	0.0365665860268461
Plasma_07_IGHG_GRIFIN	-0.0456712	-0.0816985	-0.0812341	-0.0525035	-0.0633764	-0.0381162	0.629436258960831	-0.108232	0.209972927638231	-0.143007	0.272099208380598	0.101072517676867	0.291701991410324	-0.0182931	-0.105508	-0.145158	-0.117642	-0.0536918	-0.0104731	-0.149837	-0.185061	-0.0660834	-0.0634725	0.0733638838980375	0.360786348604052	-0.176705	-0.0477032	0.0826518965687632	0.0332743681111643	0.263348556671265	0.740627518191148	-0.0686255	0.0111275140515602	-0.0236778	-0.0612504	-0.098718	0.0530877158055716	0.332968271372769	0.322775636976714	0.0384857453019984	-0.0285607	0.0517384436688157	-0.0652549	0.112343814551654	-0.108099	-0.0820668	-0.111296	-0.148706	-0.0501225
Plasma_08_IGHG_GUSBP11	-0.054433	-0.0879152	-0.0823844	-0.0532074	-0.0647958	-0.0381116	0.599521292966266	-0.111946	0.180033602637077	-0.145385	0.226067477674632	0.182109046228994	0.267366198802064	-0.0243864	-0.107816	-0.150028	-0.119582	-0.0544126	-0.0208314	-0.156875	-0.16657	-0.0678953	-0.025018	0.0641795040601434	0.332648398979141	-0.191503	-0.0489652	0.145572017327525	0.0675036317998298	0.235459429941375	0.782601591326351	0.0199771613075187	0.00226156497541814	-0.0179558	-0.059855	-0.101055	0.0458820679374329	0.297971999479015	0.281431856403293	0.0213241439889997	-0.0260494	0.198229568934175	-0.0709445	0.122860661756863	-0.0879537	-0.0749479	-0.112139	-0.14149	-0.0544866
Plasma_09_IGHG_RRM2	-0.0771295	-0.118318	-0.116736	-0.075393	-0.0918132	-0.106504	-0.0396729	0.0635898676654545	0.109358581106821	-0.0829768	-0.0462958	0.575901394986203	-0.0846501	0.190137114965974	-0.0440411	-0.188517	0.0784997857579283	-0.0781753	-0.0489775	0.546505859182976	0.563408959833102	0.0518377038648509	-0.171063	-0.190632	-0.161774	-0.161437	-0.0959282	-0.117692	-0.117035	-0.106847	-0.0425931	-0.141295	-0.070708	-0.0727557	-0.0039281	0.0963856532447093	0.234227966926362	-0.206222	0.0128393060723904	-0.0165846	-0.0526078	-0.082007	-0.162142	-0.0242422	-0.203802	0.267864981941752	0.153747606218105	-0.0952242	0.0315951152487783
Treg_FOXP3	-0.158928	-0.0743735	0.37443481385225	-0.0510689	0.0021703522591657	-0.152938	-0.145018	0.449806567313085	0.161667872459299	-0.00544625	0.0697995038078117	0.275984858370513	0.481363895648744	0.0395856577591346	-0.257591	0.137829497693148	-0.189147	-0.180409	0.645886840997755	0.632027123867644	0.537091430736133	0.0411349411794423	-0.163141	0.0320858640296444	-0.237735	0.00693612799662499	-0.116325	-0.117278	-0.114258	-0.188611	-0.0766644	-0.0271866	-0.315927	-0.0404734	0.000902176631136857	0.0343728728994908	-0.197829	0.101810702135965	-0.205554	-0.169362	-0.149026	-0.216134	-0.220333	-0.326131	-0.213411	-0.0910566	-0.361974	-0.342888	-0.0274735
[truncated: 15 more columns]

## Sheet: Sheet4
Table S4. HR analysis of TIME cell subsets. Related to Figure 2.
	cancer	HR	lower	upper	p	celltype	significance	color	cellmodule
1	LUAD	0.716	0.519	0.99	0.043	B_02_HLA.DQB1	*	Better survival	CM1
2	LUSC	1.125	0.843	1.502	0.424	B_02_HLA.DQB1		Worse survival	CM1
3	LUAD	0.728	0.449	1.182	0.199	Bn_06_GZMB		Better survival	CM1
4	LUSC	1.182	0.789	1.772	0.418	Bn_06_GZMB		Worse survival	CM1
5	LUAD	0.901	0.583	1.393	0.64	CD4T_02_GNB2L1		Better survival	CM1
6	LUSC	0.905	0.615	1.33	0.611	CD4T_02_GNB2L1		Better survival	CM1
7	LUAD	0.866	0.637	1.177	0.357	CD4T_06_ACSL5		Better survival	CM1
8	LUSC	1.28	0.997	1.644	0.053	CD4T_06_ACSL5		Worse survival	CM1
9	LUAD	0.773	0.561	1.066	0.116	CD8T_01_CCL5		Better survival	CM1
10	LUSC	0.997	0.751	1.323	0.983	CD8T_01_CCL5		Better survival	CM1
11	LUAD	0.952	0.668	1.355	0.783	CD8T_02_GZMB		Better survival	CM1
12	LUSC	0.977	0.725	1.316	0.876	CD8T_02_GZMB		Better survival	CM1
13	LUAD	1.722	1.221	2.428	0.002	CD8T_03_MKI67	**	Worse survival	CM1
14	LUSC	0.73	0.529	1.005	0.054	CD8T_03_MKI67		Better survival	CM1
15	LUAD	0.778	0.497	1.219	0.274	CD8T_04_HLA-B		Better survival	CM1
16	LUSC	0.939	0.587	1.504	0.795	CD8T_04_HLA-B		Better survival	CM1
17	LUAD	0.863	0.557	1.337	0.51	pDC_03_GZMB		Better survival	CM1
18	LUSC	1.318	0.896	1.937	0.161	pDC_03_GZMB		Worse survival	CM1
19	LUAD	0.751	0.554	1.017	0.064	Plasma_01_IGHA_MZB1		Better survival	CM1
20	LUSC	1.132	0.872	1.469	0.352	Plasma_01_IGHA_MZB1		Worse survival	CM1
21	LUAD	0.751	0.554	1.017	0.064	Plasma_02_IGHA_IGLC3		Better survival	CM1
22	LUSC	1.132	0.872	1.469	0.352	Plasma_02_IGHA_IGLC3		Worse survival	CM1
23	LUAD	0.799	0.6	1.065	0.125	Plasma_05_IGHG_IGHGP		Better survival	CM1
24	LUSC	1.11	0.862	1.428	0.419	Plasma_05_IGHG_IGHGP		Worse survival	CM1
25	LUAD	1.103	0.78	1.558	0.58	Plasma_09_IGHG_RRM2		Worse survival	CM1
26	LUSC	1.166	0.816	1.666	0.399	Plasma_09_IGHG_RRM2		Worse survival	CM1
27	LUAD	0.921	0.63	1.347	0.672	Treg_FOXP3		Better survival	CM1
28	LUSC	1.282	0.909	1.81	0.157	Treg_FOXP3		Worse survival	CM1
29	LUAD	0.931	0.549	1.577	0.789	Astrocyte_01_CAV1		Better survival	CM2
30	LUSC	0.878	0.554	1.392	0.58	Astrocyte_01_CAV1		Better survival	CM2
31	LUAD	0.61	0.347	1.073	0.086	Astrocyte_02_MALAT1		Better survival	CM2
32	LUSC	1.725	1.004	2.961	0.048	Astrocyte_02_MALAT1	*	Worse survival	CM2
33	LUAD	1.271	0.789	2.045	0.324	Astrocyte_03_ROM1		Worse survival	CM2
34	LUSC	0.803	0.483	1.335	0.398	Astrocyte_03_ROM1		Better survival	CM2
35	LUAD	1.497	0.87	2.575	0.145	Astrocyte_04_SCGB3A1		Worse survival	CM2
36	LUSC	0.888	0.511	1.541	0.672	Astrocyte_04_SCGB3A1		Better survival	CM2
37	LUAD	1.076	0.661	1.753	0.767	Astrocyte_05_HLA-DRB5		Worse survival	CM2
38	LUSC	1.335	0.868	2.054	0.188	Astrocyte_05_HLA-DRB5		Worse survival	CM2
39	LUAD	0.467	0.272	0.803	0.006	Astrocyte_06_CCL5	**	Better survival	CM2
40	LUSC	0.986	0.586	1.656	0.956	Astrocyte_06_CCL5		Better survival	CM2
41	LUAD	0.71	0.498	1.014	0.06	B_04_PTMAP2		Better survival	CM2
42	LUSC	1.148	0.841	1.568	0.383	B_04_PTMAP2		Worse survival	CM2
43	LUAD	1.282	0.892	1.843	0.179	Endothelial_02_PTMAP2		Worse survival	CM2
44	LUSC	1.391	0.985	1.965	0.061	Endothelial_02_PTMAP2		Worse survival	CM2
45	LUAD	0.978	0.672	1.422	0.905	Fibroblast_01_Myo_HIGD1B		Better survival	CM2
46	LUSC	1.405	0.932	2.118	0.105	Fibroblast_01_Myo_HIGD1B		Worse survival	CM2
47	LUAD	1.438	1.046	1.975	0.025	Fibroblast_02_Myo_COL10A1	*	Worse survival	CM2
48	LUSC	1.07	0.808	1.415	0.638	Fibroblast_02_Myo_COL10A1		Worse survival	CM2
49	LUAD	1.556	1.067	2.27	0.022	Fibroblast_03_Myo_MKI67	*	Worse survival	CM2
50	LUSC	1.153	0.813	1.635	0.425	Fibroblast_03_Myo_MKI67		Worse survival	CM2
51	LUAD	0.872	0.587	1.296	0.499	Macrophage_06_C3		Better survival	CM2
52	LUSC	1.262	0.894	1.783	0.186	Macrophage_06_C3		Worse survival	CM2
53	LUAD	1.159	0.763	1.761	0.488	Neurophil_01_GOS2		Worse survival	CM2
54	LUSC	1.351	0.979	1.866	0.067	Neurophil_01_GOS2		Worse survival	CM2
55	LUAD	0.565	0.375	0.852	0.006	CD4T_03_SCGB3A1	**	Better survival	CM3
56	LUSC	1.442	1.035	2.011	0.031	CD4T_03_SCGB3A1	*	Worse survival	CM3
57	LUAD	0.636	0.462	0.876	0.006	CD4T_05_SFTPB	**	Better survival	CM3
58	LUSC	1.39	1.054	1.832	0.02	CD4T_05_SFTPB	*	Worse survival	CM3
59	LUAD	0.818	0.571	1.172	0.273	cDC_01_CLEC10A		Better survival	CM3
60	LUSC	1.082	0.795	1.472	0.616	cDC_01_CLEC10A		Worse survival	CM3
61	LUAD	0.827	0.582	1.174	0.288	cDC_02_CD207		Better survival	CM3
62	LUSC	1.133	0.83	1.547	0.432	cDC_02_CD207		Worse survival	CM3
63	LUAD	0.786	0.535	1.154	0.22	Endothelial_05_IL1RL1		Better survival	CM3
64	LUSC	1.302	0.868	1.951	0.202	Endothelial_05_IL1RL1		Worse survival	CM3
65	LUAD	0.793	0.549	1.145	0.215	Endothelial_09_S100A14		Better survival	CM3
66	LUSC	1.502	1.075	2.101	0.017	Endothelial_09_S100A14	*	Worse survival	CM3
67	LUAD	0.804	0.548	1.179	0.264	Fibroblast_04_Alveolar_DPT		Better survival	CM3
68	LUSC	1.61	1.16	2.235	0.004	Fibroblast_04_Alveolar_DPT	**	Worse survival	CM3
69	LUAD	1.429	0.993	2.057	0.055	Macrophage_02_FCN1		Worse survival	CM3
70	LUSC	1.552	1.103	2.184	0.012	Macrophage_02_FCN1	*	Worse survival	CM3
71	LUAD	1.611	1.063	2.442	0.025	Macrophage_04_SPP1	*	Worse survival	CM3
72	LUSC	1.477	0.968	2.254	0.071	Macrophage_04_SPP1		Worse survival	CM3
73	LUAD	0.719	0.418	1.236	0.233	Macrophage_07_IGKC		Better survival	CM3
74	LUSC	1.196	0.794	1.801	0.393	Macrophage_07_IGKC		Worse survival	CM3
75	LUAD	0.653	0.434	0.983	0.041	Macrophage_08_SCGB3A2	*	Better survival	CM3
76	LUSC	1.565	1.142	2.146	0.005	Macrophage_08_SCGB3A2	**	Worse survival	CM3
77	LUAD	1.794	1.275	2.524	0.001	Macrophage_09_MKI67	***	Worse survival	CM3
78	LUSC	0.817	0.595	1.122	0.211	Macrophage_09_MKI67		Better survival	CM3
79	LUAD	0.639	0.433	0.942	0.024	Mast_01_GNB2L1	*	Better survival	CM3
80	LUSC	1.367	0.983	1.901	0.063	Mast_01_GNB2L1		Worse survival	CM3
81	LUAD	0.735	0.461	1.172	0.196	Mast_03_PBK		Better survival	CM3
82	LUSC	1.121	0.741	1.694	0.589	Mast_03_PBK		Worse survival	CM3
83	LUAD	0.842	0.57	1.244	0.389	NK_01_FGFBP2		Better survival	CM3
84	LUSC	0.951	0.659	1.373	0.79	NK_01_FGFBP2		Better survival	CM3
85	LUAD	0.648	0.429	0.978	0.039	B_01_HLA-DRA	*	Better survival	CM4
86	LUSC	1.051	0.717	1.54	0.801	B_01_HLA-DRA		Worse survival	CM4
87	LUAD	0.793	0.48	1.31	0.365	B_03_CD3E		Better survival	CM4
88	LUSC	1.151	0.772	1.718	0.49	B_03_CD3E		Worse survival	CM4
89	LUAD	0.58	0.38	0.885	0.012	B_05_FYN	*	Better survival	CM4
90	LUSC	0.908	0.6	1.375	0.65	B_05_FYN		Better survival	CM4
91	LUAD	0.557	0.32	0.971	0.039	CD4T_01_IL7R	*	Better survival	CM4
92	LUSC	1.285	0.764	2.161	0.345	CD4T_01_IL7R		Worse survival	CM4
93	LUAD	0.697	0.488	0.996	0.048	Endothelial_07_NOTCH3	*	Better survival	CM4
94	LUSC	1.584	1.121	2.239	0.009	Endothelial_07_NOTCH3	**	Worse survival	CM4
95	LUAD	0.831	0.589	1.172	0.292	Fibroblast_05_Alveolar_MYH11		Better survival	CM4
96	LUSC	1.442	1.044	1.992	0.026	Fibroblast_05_Alveolar_MYH11	*	Worse survival	CM4
97	LUAD	0.738	0.524	1.038	0.081	Plasma_03_IGHA_GUSBP11		Better survival	CM4
98	LUSC	1.187	0.883	1.595	0.257	Plasma_03_IGHA_GUSBP11		Worse survival	CM4
99	LUAD	0.768	0.45	1.311	0.333	Plasma_04_IGHA_VPS13D		Better survival	CM4
100	LUSC	0.909	0.556	1.488	0.705	Plasma_04_IGHA_VPS13D		Better survival	CM4
101	LUAD	1.23	0.75	2.018	0.413	Plasma_07_IGHG_GRIFIN		Worse survival	CM4
102	LUSC	1.045	0.672	1.625	0.846	Plasma_07_IGHG_GRIFIN		Worse survival	CM4
103	LUAD	0.738	0.524	1.038	0.081	Plasma_08_IGHG_GUSBP11		Better survival	CM4
104	LUSC	1.187	0.883	1.595	0.257	Plasma_08_IGHG_GUSBP11		Worse survival	CM4
105	LUAD	0.795	0.557	1.134	0.206	Endothelial_01_FCN3		Better survival	CM5
106	LUSC	1.526	1.112	2.092	0.009	Endothelial_01_FCN3	**	Worse survival	CM5
107	LUAD	0.788	0.554	1.119	0.182	Endothelial_03_VCAM1		Better survival	CM5
108	LUSC	1.317	0.946	1.835	0.103	Endothelial_03_VCAM1		Worse survival	CM5
109	LUAD	0.825	0.571	1.193	0.308	Endothelial_04_DKK2		Better survival	CM5
110	LUSC	1.444	1.04	2.006	0.028	Endothelial_04_DKK2	*	Worse survival	CM5
111	LUAD	0.928	0.663	1.298	0.662	Endothelial_06_CD68		Better survival	CM5
112	LUSC	1.305	0.951	1.789	0.099	Endothelial_06_CD68		Worse survival	CM5
113	LUAD	0.825	0.547	1.243	0.357	Endothelial_08_CCL21		Better survival	CM5
114	LUSC	1.74	1.184	2.557	0.005	Endothelial_08_CCL21	**	Worse survival	CM5
115	LUAD	1.164	0.819	1.655	0.398	Fibroblast_06_Alveolar_MS4A7		Worse survival	CM5
116	LUSC	1.328	0.97	1.82	0.077	Fibroblast_06_Alveolar_MS4A7		Worse survival	CM5
117	LUAD	0.708	0.461	1.087	0.114	Macrophage_01_LGMN		Better survival	CM5
118	LUSC	1.372	0.991	1.898	0.056	Macrophage_01_LGMN		Worse survival	CM5
119	LUAD	0.871	0.607	1.251	0.454	Macrophage_03_MARCO		Better survival	CM5
120	LUSC	1.765	1.24	2.513	0.002	Macrophage_03_MARCO	**	Worse survival	CM5
121	LUAD	0.725	0.496	1.06	0.097	Macrophage_05_CSTB		Better survival	CM5
122	LUSC	1.241	0.881	1.749	0.216	Macrophage_05_CSTB		Worse survival	CM5
123	LUAD	0.427	0.27	0.675	0	Mast_02_CHIT1	****	Better survival	CM5
124	LUSC	1.398	0.977	2.002	0.067	Mast_02_CHIT1		Worse survival	CM5

## Sheet: Sheet5
Table S5. Top 30 marker genes of TIME subtypes. Related to Figure 2.
	p_val	avg_log2FC	pct.1	pct.2	p_val_adj	cluster	gene
1	0	1.39189277015437	0.571	0.257	0	CM1	TRAC
2	0	2.73075707360946	0.676	0.368	0	CM1	IGKC
3	0	1.64674395315071	0.487	0.204	0	CM1	CD3D
4	0	1.71181306618017	0.557	0.281	0	CM1	IL32
5	0	2.59428915557661	0.428	0.157	0	CM1	IGLC2
6	0	3.10144650437976	0.415	0.152	0	CM1	IGHA1
7	0	1.32973393293004	0.498	0.236	0	CM1	CD2
8	0	1.4629593213205	0.441	0.186	0	CM1	CD3E
9	0	2.4762552732397	0.372	0.126	0	CM1	GZMA
10	0	2.18058565613334	0.489	0.249	0	CM1	CCL5
11	0	1.53996578854819	0.425	0.187	0	CM1	DUSP4
12	0	2.14423440132969	0.36	0.125	0	CM1	CD7
13	0	1.43888232546309	0.399	0.172	0	CM1	ISG20
14	0	1.67183423309435	0.336	0.109	0	CM1	NKG7
15	0	1.38047022980338	0.399	0.175	0	CM1	ACAP1
16	0	1.39551914818671	0.358	0.147	0	CM1	CD3G
17	0	1.28689086385025	0.371	0.166	0	CM1	ITM2A
18	0	2.31609344512895	0.257	0.06	0	CM1	TIGIT
19	0	1.37039117120306	0.33	0.135	0	CM1	LCK
20	0	1.39884256189014	0.363	0.168	0	CM1	CLEC2D
21	0	1.42576320834322	0.342	0.161	0	CM1	CST7
22	0	1.3714941280226	0.27	0.105	0	CM1	ICAM3
23	0	1.30499694422987	0.288	0.123	0	CM1	TUBA4A
24	0	2.82495775679214	0.283	0.12	0	CM1	IGHG3
25	0	1.28302476616787	0.277	0.116	0	CM1	CD96
26	0	1.47970239155778	0.256	0.096	0	CM1	IL2RB
27	0	1.62799829466181	0.299	0.142	0	CM1	APOBEC3G
28	0	1.45150292154017	0.262	0.115	0	CM1	IGLC3
29	0	1.33274965333574	0.281	0.138	0	CM1	PTPN7
30	7.21897999557133e-176	1.37213794897606	0.237	0.315	3.41898111570254e-171	CM1	ALDOA
31	0	2.66002540122115	0.457	0.105	0	CM2	FTH1P20
32	0	9.05557603882192	0.268	0.02	0	CM2	PLP1
33	0	5.65796981942925	0.256	0.025	0	CM2	CAMK2N1
34	0	3.10658504881119	0.27	0.049	0	CM2	HTRA1
35	0	3.01611861709478	0.266	0.058	0	CM2	FSCN1
36	0	2.89771958528436	0.357	0.156	0	CM2	APP
37	0	2.63002490340122	0.264	0.066	0	CM2	FTH1P8
38	0	2.98827810289417	0.287	0.1	0	CM2	DST
39	0	4.33510936587085	0.29	0.104	0	CM2	CSF3R
40	0	3.75955287896912	0.303	0.117	0	CM2	SPARC
41	0	4.85615708233243	0.281	0.097	0	CM2	CNP
42	0	2.44126370768895	0.333	0.155	0	CM2	MARCKSL1
43	0	3.11896250659279	0.296	0.123	0	CM2	SLC25A37
44	0	3.59439612666759	0.323	0.151	0	CM2	G0S2
45	0	2.2715006485862	0.265	0.097	0	CM2	RTL8C
46	0	2.94929327881086	0.269	0.102	0	CM2	SORT1
47	0	2.17184398181783	0.285	0.118	0	CM2	RASSF2
48	0	2.76036724463745	0.258	0.098	0	CM2	CLU
49	0	3.04168825253137	0.359	0.203	0	CM2	CLDND1
50	0	2.56754051685266	0.301	0.146	0	CM2	TSC22D4
51	0	2.6691866615978	0.282	0.129	0	CM2	CSRP1
52	0	2.30722166045971	0.258	0.106	0	CM2	SECISBP2L
53	0	2.81877350540645	0.265	0.119	0	CM2	SLC44A1
54	0	2.64293039627182	0.255	0.118	0	CM2	SIRT2
55	0	2.3787774512411	0.338	0.204	0	CM2	DPYSL2
56	0	3.32109055107317	0.388	0.264	0	CM2	CXCL8
57	0	2.3334631591505	0.289	0.179	0	CM2	PPIF
58	0	2.61589034645926	0.574	0.464	0	CM2	IFITM2
59	0	2.21208485427507	0.483	0.377	0	CM2	NAMPT
60	7.25343076122115e-224	2.33875384608636	0.272	0.197	3.43529734282195e-219	CM2	C5AR1
61	0	1.41436081589016	0.676	0.327	0	CM3	CST3
62	0	1.15078150825074	0.617	0.297	0	CM3	FCER1G
63	0	1.6810037714075	0.481	0.212	0	CM3	TIMP1
64	0	1.07683953437226	0.661	0.401	0	CM3	LGALS1
65	0	1.05749064976634	0.479	0.232	0	CM3	AIF1
66	0	1.10963784364435	0.47	0.24	0	CM3	CTSH
67	0	1.02397401582938	0.413	0.187	0	CM3	C1orf162
68	0	1.87358575193376	0.303	0.08	0	CM3	VEGFA
69	0	2.49420388665115	0.3	0.092	0	CM3	SFTPB
70	0	1.04678971848331	0.38	0.176	0	CM3	MS4A6A
71	0	1.17109609563099	0.352	0.148	0	CM3	IL1B
72	0	3.21903429416005	0.272	0.07	0	CM3	SCGB3A2
73	0	1.05330904923071	0.391	0.191	0	CM3	LST1
74	0	1.75084338040157	0.312	0.114	0	CM3	C15orf48
75	0	1.43601571686789	0.351	0.153	0	CM3	TGFBI
76	0	1.31609962582871	0.317	0.121	0	CM3	FGL2
77	0	1.0871470829575	0.338	0.143	0	CM3	TMEM176B
78	0	1.14377078276396	0.344	0.157	0	CM3	SPINT2
79	0	1.4190702140393	0.301	0.117	0	CM3	CD86
80	0	4.09512610963498	0.293	0.116	0	CM3	SCGB3A1
81	0	1.03954937173052	0.29	0.119	0	CM3	CSF1R
82	0	1.07169414316019	0.601	0.43	0	CM3	HLA-DPB1
83	0	1.19713636896994	0.321	0.152	0	CM3	CD14
84	0	1.38545886305301	0.263	0.109	0	CM3	FCGR2B
85	0	1.19798421005395	0.262	0.108	0	CM3	TMEM176A
86	0	1.44717056990707	0.338	0.185	0	CM3	AREG
87	0	1.35830856456702	0.254	0.11	0	CM3	DUSP6
88	0	1.0523871692229	0.287	0.151	0	CM3	HBEGF
89	0	1.1379062950401	0.29	0.158	0	CM3	INSIG1
90	0	2.44987915114963	0.317	0.192	0	CM3	SPP1
91	0	2.00291283339755	0.491	0.123	0	CM4	HLA.B
92	0	1.93756799849377	0.43	0.113	0	CM4	HLA.A
93	0	2.17329128184278	0.401	0.1	0	CM4	HLA.E
94	0	2.68668900310629	0.533	0.235	0	CM4	TTC19
95	0	1.82446301766564	0.387	0.103	0	CM4	HLA.C
96	0	1.19332546670472	0.398	0.119	0	CM4	MTRNR2L1
97	0	2.21199610946858	0.558	0.283	0	CM4	RPL17
98	0	2.87691906878603	0.348	0.073	0	CM4	AP002990.1
99	0	2.75866817759559	0.373	0.1	0	CM4	EEF1G
100	0	3.1647300163635	0.332	0.06	0	CM4	LINC01641
101	0	2.44264327480053	0.465	0.199	0	CM4	NBEAL1
102	0	1.27624394353559	0.522	0.263	0	CM4	MTRNR2L12
103	0	2.80126657273715	0.341	0.09	0	CM4	TIPIN
104	0	1.85150916152562	0.649	0.399	0	CM4	RPL36A
105	0	1.86862159643833	0.351	0.105	0	CM4	Metazoa-SRP
106	0	1.25987779590193	0.488	0.272	0	CM4	LTB
107	0	1.44257579364926	0.507	0.3	0	CM4	IL7R
108	0	2.34015698697279	0.273	0.087	0	CM4	CCR7
109	0	1.15442	0.388	0.213	0	CM4	SPOCK2
110	0	1.26859255513399	0.73	0.569	0	CM4	RPS17
111	0	1.1830787163182	0.904	0.745	0	CM4	RPL41
112	0	1.25359122361537	0.402	0.247	0	CM4	ETS1
113	0	1.2140116564737	0.703	0.551	0	CM4	RPS10
114	0	1.10872255565719	0.504	0.358	0	CM4	BIRC3
115	0	1.84290530982783	0.251	0.145	0	CM4	CYSLTR1
116	0	1.6333061106811	0.268	0.164	0	CM4	CRIP1
117	0	1.72831927216376	0.258	0.154	0	CM4	GAS5
118	0	1.23533792309869	0.34	0.247	0	CM4	FYN
119	1.32882939435646e-149	1.15587791296631	0.395	0.386	6.29346889461163e-145	CM4	EIF4B
120	4.27539825001685e-134	1.10504127686363	0.266	0.221	2.02487136519048e-129	CM4	CDKN1B
121	0	3.61910282033672	0.831	0.148	0	CM5	GPNMB
122	0	3.98350415833226	0.839	0.18	0	CM5	APOE
123	0	4.08280171380364	0.84	0.182	0	CM5	APOC1
124	0	3.31137227032561	0.848	0.197	0	CM5	C1QA
125	0	3.1341409833705	0.853	0.213	0	CM5	C1QB
126	0	3.11283810928744	0.759	0.168	0	CM5	ACP5
127	0	3.27208036026329	0.69	0.117	0	CM5	CD68
128	0	2.9847394726376	0.829	0.26	0	CM5	CTSZ
129	0	3.35469145451117	0.741	0.176	0	CM5	LIPA
130	0	3.25394767678925	0.619	0.098	0	CM5	MSR1
131	0	3.07093515972407	0.922	0.408	0	CM5	CTSD
132	0	3.22593993910571	0.57	0.081	0	CM5	NUPR1
133	0	5.21259733236059	0.571	0.087	0	CM5	CCL18
134	0	3.12114188258964	0.537	0.072	0	CM5	CFD
135	0	3.40007595979239	0.548	0.116	0	CM5	LGMN
136	0	3.71275101851193	0.496	0.065	0	CM5	MARCO
137	0	3.54477482123946	0.454	0.065	0	CM5	FUCA1
138	0	3.39230765181421	0.438	0.053	0	CM5	CYP27A1
139	0	3.12408838923755	0.446	0.088	0	CM5	GCHFR
140	0	3.23678257756149	0.4	0.044	0	CM5	ALDH1A1
141	0	3.49751355474019	0.376	0.048	0	CM5	PLA2G7
142	0	3.32133204461877	0.36	0.065	0	CM5	PLTP
143	0	3.57101944240926	0.319	0.035	0	CM5	LPL
144	0	3.06062088805054	0.316	0.035	0	CM5	KCNMA1
145	0	3.04484564905967	0.323	0.044	0	CM5	SIGLEC1
146	0	3.03065669557619	0.398	0.12	0	CM5	IFI27
147	0	3.16166914096202	0.296	0.044	0	CM5	FOLR2
148	0	3.75716026390253	0.284	0.046	0	CM5	SELENOP
149	0	3.41403142029501	0.277	0.05	0	CM5	SLC40A1
150	0	3.04588148087337	0.982	0.847	0	CM5	FTL

## Sheet: Sheet6
Table S6. Top 200 marker genes of GEs. Related to Figure 3.
	GE	gene	Nb	C	percent	totavg_log2FC
1	GE1	TNXB	11	630	1.74603174603175	4.3089066171342
2	GE1	FABP5	1	630	0.158730158730159	3.94261957885294
3	GE1	POLR2J3.1	1	630	0.158730158730159	3.80726399558397
4	GE1	AC108215.1	11	630	1.74603174603175	3.60738305689202
5	GE1	ALKAL1	2	630	0.317460317460317	3.52664046461754
6	GE1	AL034417.3	6	630	0.952380952380952	3.45425525119488
7	GE1	GEM	11	630	1.74603174603175	3.31812857847363
8	GE1	SCGB3A1	2	630	0.317460317460317	3.25732062451598
9	GE1	PGC	7	630	1.11111111111111	3.24365985801031
10	GE1	AL928596.1	2	630	0.317460317460317	3.18661469136716
11	GE1	PDLIM3	11	630	1.74603174603175	3.16947071125549
12	GE1	SNHG25	11	630	1.74603174603175	3.01569112385272
13	GE1	SYCE1L	2	630	0.317460317460317	2.84803214125351
14	GE1	SMCR5	4	630	0.634920634920635	2.83686985862344
15	GE1	CTGF	7	630	1.11111111111111	2.81889832059373
16	GE1	ALOX15B	11	630	1.74603174603175	2.81864440269508
17	GE1	HSPG2	6	630	0.952380952380952	2.81182458631213
18	GE1	COL9A2	2	630	0.317460317460317	2.78608548270829
19	GE1	SLC1A7	4	630	0.634920634920635	2.63321677527832
20	GE1	FTX	2	630	0.317460317460317	2.61865328157153
21	GE1	CBR3-AS1	1	630	0.158730158730159	2.61712109865553
22	GE1	GPC3	4	630	0.634920634920635	2.61181765982907
23	GE1	SNHG9	11	630	1.74603174603175	2.55343844459087
24	GE1	LINC-PINT	3	630	0.476190476190476	2.47855312760023
25	GE1	PER1	5	630	0.793650793650794	2.32810102093133
26	GE1	ICAM4	2	630	0.317460317460317	2.32685333232434
27	GE1	CAVIN1	2	630	0.317460317460317	2.27000229158736
28	GE1	PEG10	6	630	0.952380952380952	2.26418639738824
29	GE1	TNNC2	3	630	0.476190476190476	2.26230892179852
30	GE1	AC027290.2	2	630	0.317460317460317	2.2424087287938
31	GE1	NR4A1	8	630	1.26984126984127	2.19374653246876
32	GE1	MUC20-OT1	1	630	0.158730158730159	2.1916731116492
33	GE1	HSD17B6	7	630	1.11111111111111	2.19064826978795
34	GE1	PTK7	7	630	1.11111111111111	2.18836729130426
35	GE1	SELENON	4	630	0.634920634920635	2.18350107930373
36	GE1	MEF2C	1	630	0.158730158730159	2.18300749139652
37	GE1	POLR2J3-1	6	630	0.952380952380952	2.16894205245828
38	GE1	EEF1A2	2	630	0.317460317460317	2.16644891571355
39	GE1	CRYM	6	630	0.952380952380952	2.10518533725487
40	GE1	GLS	5	630	0.793650793650794	2.09731999765377
41	GE1	IRX2	11	630	1.74603174603175	2.06704254775237
42	GE1	ABHD5	2	630	0.317460317460317	2.05636565542363
43	GE1	CEACAM5	11	630	1.74603174603175	2.0433431584809
44	GE1	SUSD2	9	630	1.42857142857143	2.0433295235969
45	GE1	DLC1	5	630	0.793650793650794	2.03784539943046
46	GE1	NRP1	2	630	0.317460317460317	2.02975479636678
47	GE1	EPHA2	2	630	0.317460317460317	2.02174363775643
48	GE1	ZDHHC21	2	630	0.317460317460317	2.00041573602947
49	GE1	CYP4B1	3	630	0.476190476190476	1.99747835938658
50	GE1	XIST	11	630	1.74603174603175	1.98766016557071
51	GE1	MID1IP1	2	630	0.317460317460317	1.97885246336984
52	GE1	TNRC18	3	630	0.476190476190476	1.96479459352372
53	GE1	AC021078.1	2	630	0.317460317460317	1.96301551761234
54	GE1	ATP5MC1	1	630	0.158730158730159	1.93042480518268
55	GE1	MAFB	2	630	0.317460317460317	1.92410453090948
56	GE1	TENT5A	8	630	1.26984126984127	1.91219096413785
57	GE1	ATP5ME	11	630	1.74603174603175	1.89022546220204
58	GE1	ATP5MF	9	630	1.42857142857143	1.87628589444028
59	GE1	MAP1LC3A	5	630	0.793650793650794	1.8706564244685
60	GE1	BCAM	1	630	0.158730158730159	1.86484236611012
61	GE1	SLC5A3	6	630	0.952380952380952	1.85333530799737
62	GE1	ATP5PB	1	630	0.158730158730159	1.85270311297184
63	GE1	TMEM63B	1	630	0.158730158730159	1.84331568085392
64	GE1	OGA	2	630	0.317460317460317	1.82638148332439
65	GE1	MMP24OS	10	630	1.58730158730159	1.82139424091998
66	GE1	PRSS8	9	630	1.42857142857143	1.81163925364116
67	GE1	ARRDC3	1	630	0.158730158730159	1.81042941379646
68	GE1	FTH1P10	11	630	1.74603174603175	1.79630806324567
69	GE1	TP53INP1	1	630	0.158730158730159	1.7902011763742
70	GE1	NCOA2	2	630	0.317460317460317	1.77533955222321
71	GE1	ZBTB20	1	630	0.158730158730159	1.76451099835286
72	GE1	METRN	1	630	0.158730158730159	1.76322311692512
73	GE1	LENG8	2	630	0.317460317460317	1.76094380900983
74	GE1	MYLIP	2	630	0.317460317460317	1.75206804302911
75	GE1	GAS5	1	630	0.158730158730159	1.73957895858202
76	GE1	NEDD9	6	630	0.952380952380952	1.73454380105938
77	GE1	NFIX	3	630	0.476190476190476	1.73084977791589
78	GE1	AGR3	2	630	0.317460317460317	1.71597346010057
79	GE1	NOP53	5	630	0.793650793650794	1.70543102995224
80	GE1	ATP5F1E	11	630	1.74603174603175	1.6988310502586
81	GE1	AREG	7	630	1.11111111111111	1.69557300420032
82	GE1	COL18A1	2	630	0.317460317460317	1.6921929201528
83	GE1	MUC21	8	630	1.26984126984127	1.68653491365499
84	GE1	FAM84B	6	630	0.952380952380952	1.67922849734315
85	GE1	ATP5F1C	2	630	0.317460317460317	1.67329495827664
86	GE1	ATP5MC3	2	630	0.317460317460317	1.66743944003726
87	GE1	ATP5PO	2	630	0.317460317460317	1.66231619057576
88	GE1	ATP5PD	2	630	0.317460317460317	1.64515364387823
89	GE1	ATP5IF1	8	630	1.26984126984127	1.64474427163408
90	GE1	ATP5MD	8	630	1.26984126984127	1.62756163566737
91	GE1	CITED2	2	630	0.317460317460317	1.61934777228469
92	GE1	SNHG19	1	630	0.158730158730159	1.61917146103946
93	GE1	SELENOH	2	630	0.317460317460317	1.61400303280665
94	GE1	SNHG6	6	630	0.952380952380952	1.60412444091028
95	GE1	PIGR	1	630	0.158730158730159	1.60240392518454
96	GE1	LRRC75A-AS1	9	630	1.42857142857143	1.60102396963777
97	GE1	ATP5F1A	1	630	0.158730158730159	1.57663011122795
98	GE1	ATP5F1D	2	630	0.317460317460317	1.57117862280656
99	GE1	ATP5PF	8	630	1.26984126984127	1.56341250722473
100	GE1	ATP5F1B	2	630	0.317460317460317	1.53956309261179
101	GE2	BNIP3P9	2	1853	0.107933081489477	6.62131457472512
102	GE2	IQGAP3	1	1853	0.0539665407447383	6.38639093103547
103	GE2	PIMREG	1	1853	0.0539665407447383	6.09022166814232
104	GE2	KIF14	1	1853	0.0539665407447383	5.81588017643201
105	GE2	HJURP	1	1853	0.0539665407447383	5.77765934989655
106	GE2	KIF18B	1	1853	0.0539665407447383	5.70605422392413
107	GE2	TTK	1	1853	0.0539665407447383	5.33567673532902
108	GE2	KIFC1	1	1853	0.0539665407447383	5.28972754440298
109	GE2	BUB1B	1	1853	0.0539665407447383	5.28803328822755
110	GE2	KIF15	1	1853	0.0539665407447383	5.26627388463078
111	GE2	TMSB15A	1	1853	0.0539665407447383	5.2341977234459
112	GE2	CDCA2	1	1853	0.0539665407447383	5.22071797805668
113	GE2	VTRNA1-2	6	1853	0.32379924446843	5.19221992618838
114	GE2	NDC80	1	1853	0.0539665407447383	5.17316496066299
115	GE2	DLK1	8	1853	0.431732325957906	5.0937508353344
116	GE2	KNL1	1	1853	0.0539665407447383	5.09290847716504
117	GE2	SYCP2	2	1853	0.107933081489477	5.07563151985567
118	GE2	DUSP4	1	1853	0.0539665407447383	5.02064920541011
119	GE2	NCAPH	1	1853	0.0539665407447383	5.01743508356625
120	GE2	TCEAL2	5	1853	0.269832703723691	4.95898110933797
121	GE2	KIF23	1	1853	0.0539665407447383	4.8840611191726
122	GE2	ZNF93	2	1853	0.107933081489477	4.83574810666743
123	GE2	DEPDC1B	1	1853	0.0539665407447383	4.8349957921733
124	GE2	KIF11	1	1853	0.0539665407447383	4.82877682397954
125	GE2	CIP2A	1	1853	0.0539665407447383	4.79648639662115
126	GE2	SGO2	1	1853	0.0539665407447383	4.77908344735634
127	GE2	NCAPG	1	1853	0.0539665407447383	4.76293792275389
128	GE2	PLP1	2	1853	0.107933081489477	4.76179851385799
129	GE2	PADI2	2	1853	0.107933081489477	4.70667023389841
130	GE2	PLK1	1	1853	0.0539665407447383	4.63831727981136
131	GE2	ARHGAP11A	1	1853	0.0539665407447383	4.63440323879647
132	GE2	SPC24	1	1853	0.0539665407447383	4.6310734927528
133	GE2	ZNF253	2	1853	0.107933081489477	4.63093250290722
134	GE2	CDCA5	1	1853	0.0539665407447383	4.53043559739112
135	GE2	DNAJC3-AS1	8	1853	0.431732325957906	4.51844266244205
136	GE2	GTSE1	1	1853	0.0539665407447383	4.45251374299954
137	GE2	DEPDC1	1	1853	0.0539665407447383	4.40430297294411
138	GE2	HMMR	1	1853	0.0539665407447383	4.34912304287352
139	GE2	SOX21	7	1853	0.377765785213168	4.32550706360954
140	GE2	HTR3A	1	1853	0.0539665407447383	4.3023433025051
141	GE2	SAPCD2	1	1853	0.0539665407447383	4.27607578859604
142	GE2	AURKB	1	1853	0.0539665407447383	4.26749321711556
143	GE2	SP8	1	1853	0.0539665407447383	4.26371148141829
144	GE2	BUB1	1	1853	0.0539665407447383	4.2459969316276
145	GE2	CDKN3	1	1853	0.0539665407447383	4.24098
146	GE2	FAM159B	2	1853	0.107933081489477	4.22522476845914
147	GE2	KDELC1	5	1853	0.269832703723691	4.19019761499261
148	GE2	BRIP1	1	1853	0.0539665407447383	4.18986818923331
149	GE2	CDC20	1	1853	0.0539665407447383	4.18584418509457
150	GE2	DLGAP5	1	1853	0.0539665407447383	4.18220895027348
151	GE2	PBK	1	1853	0.0539665407447383	4.15234723975145
152	GE2	MELK	1	1853	0.0539665407447383	4.14597637628436
153	GE2	CCNA2	1	1853	0.0539665407447383	4.1186455785344
154	GE2	SKA3	1	1853	0.0539665407447383	4.10662325347975
155	GE2	SPAG5	1	1853	0.0539665407447383	4.09763389945882
156	GE2	AKAP12	8	1853	0.431732325957906	4.0916
157	GE2	KIF2C	1	1853	0.0539665407447383	4.0845795972402
158	GE2	CHCHD2P9	8	1853	0.431732325957906	4.08449316600865
159	GE2	RAD51AP1	1	1853	0.0539665407447383	4.08334052003204
160	GE2	TROAP	1	1853	0.0539665407447383	4.07115583521575
161	GE2	UBE2C	1	1853	0.0539665407447383	4.07053844247899
162	GE2	CKAP2L	1	1853	0.0539665407447383	3.99083267896147
163	GE2	CCNB2	1	1853	0.0539665407447383	3.95458407198132
164	GE2	CFAP45	1	1853	0.0539665407447383	3.93488124686083
165	GE2	GPC6	8	1853	0.431732325957906	3.91564432781983
166	GE2	BIRC5	1	1853	0.0539665407447383	3.90211836924827
167	GE2	CENPA	1	1853	0.0539665407447383	3.88607865536934
168	GE2	HPN	2	1853	0.107933081489477	3.87322199666028
169	GE2	SLAMF7	1	1853	0.0539665407447383	3.8625950382591
170	GE2	SPC25	1	1853	0.0539665407447383	3.86128084584539
171	GE2	CCNE1	2	1853	0.107933081489477	3.84290974245682
172	GE2	NEK2	1	1853	0.0539665407447383	3.81865251898077
173	GE2	CCNB1	1	1853	0.0539665407447383	3.80005787085136
174	GE2	RBM8B	8	1853	0.431732325957906	3.79916309841281
175	GE2	GEN1	1	1853	0.0539665407447383	3.79840785819086
176	GE2	TCHH	1	1853	0.0539665407447383	3.79817511110513
177	GE2	NUF2	1	1853	0.0539665407447383	3.78885865934613
178	GE2	RRM2	1	1853	0.0539665407447383	3.78085435652385
179	GE2	FAM83D	1	1853	0.0539665407447383	3.77409090596823
180	GE2	AC026401.3	1	1853	0.0539665407447383	3.76007172856391
181	GE2	SEPT3	2	1853	0.107933081489477	3.75647635012789
182	GE2	GINS1	1	1853	0.0539665407447383	3.74773094408409
183	GE2	PCDHB5	7	1853	0.377765785213168	3.74652606631262
184	GE2	KIF4A	1	1853	0.0539665407447383	3.72504208200002
185	GE2	SLITRK6	8	1853	0.431732325957906	3.71629156949958
186	GE2	CENPE	1	1853	0.0539665407447383	3.71396171119314
187	GE2	VWDE	1	1853	0.0539665407447383	3.70517863932514
188	GE2	CDCA8	1	1853	0.0539665407447383	3.69247458291887
189	GE2	ANLN	1	1853	0.0539665407447383	3.67774860872474
190	GE2	CRMP1	1	1853	0.0539665407447383	3.67436129493341
191	GE2	AP002784.2	1	1853	0.0539665407447383	3.67074886201538
192	GE2	VANGL2	7	1853	0.377765785213168	3.66873672323093
193	GE2	NDUFB4P12	1	1853	0.0539665407447383	3.65874339599154
194	GE2	PTTG1	1	1853	0.0539665407447383	3.65471337678875
195	GE2	CCNF	1	1853	0.0539665407447383	3.64475755946436
196	GE2	SKP2	8	1853	0.431732325957906	3.63995876983921
197	GE2	GAS6-AS1	4	1853	0.215866162978953	3.63971770478536
198	GE2	AC131206.1	4	1853	0.215866162978953	3.63433943695911
199	GE2	ABCA12	2	1853	0.107933081489477	3.63144813732495
200	GE2	FANCI	1	1853	0.0539665407447383	3.62639956413663
201	GE3	FAM64A	2	2019	0.0990589400693413	5.95420015672246
202	GE3	HOXB-AS3	1	2019	0.0495294700346706	5.35731005461102
203	GE3	RP11-230G5.2	7	2019	0.346706290242694	5.06002015538127
204	GE3	FYB	5	2019	0.247647350173353	4.82759
205	GE3	RP11-400N13.3	6	2019	0.297176820208024	4.77020504539127
206	GE3	KIAA0101	2	2019	0.0990589400693413	4.65963535242108
207	GE3	KRT17	1	2019	0.0495294700346706	4.55511000775108
208	GE3	NUPR2	12	2019	0.594353640416048	4.54714734942007
209	GE3	IGF2	12	2019	0.594353640416048	4.54343751315874
210	GE3	C1orf105	8	2019	0.396235760277365	4.50816178695049
211	GE3	GTSE1	2	2019	0.0990589400693413	4.45251374299954
212	GE3	SGOL2	2	2019	0.0990589400693413	4.44085359529802
213	GE3	UTP11L	1	2019	0.0495294700346706	4.36452495670436
214	GE3	RP5-908M14.9	2	2019	0.0990589400693413	4.36190886273982
215	GE3	HMMR	2	2019	0.0990589400693413	4.34912304287352
216	GE3	RP5-884M6.1	1	2019	0.0495294700346706	4.34463725894362
217	GE3	CDCA3	2	2019	0.0990589400693413	4.31235146713253
218	GE3	AURKB	2	2019	0.0990589400693413	4.26749321711556
219	GE3	PRKCDBP	11	2019	0.544824170381377	4.24653085690955
220	GE3	CDKN3	2	2019	0.0990589400693413	4.24098
221	GE3	C14orf80	2	2019	0.0990589400693413	4.22176403667011
222	GE3	CDC20	2	2019	0.0990589400693413	4.18584418509457
223	GE3	DLGAP5	2	2019	0.0990589400693413	4.18220895027348
224	GE3	CENPN	2	2019	0.0990589400693413	4.17046750091891
225	GE3	RP11-254I22.3	9	2019	0.445765230312036	4.15721389859184
226	GE3	KRTAP2-3	1	2019	0.0495294700346706	4.12685151992348
227	GE3	CCNA2	2	2019	0.0990589400693413	4.1186455785344
228	GE3	KB-1732A1.1	1	2019	0.0495294700346706	4.11560616214765
229	GE3	KIF2C	1	2019	0.0495294700346706	4.0845795972402
230	GE3	TROAP	2	2019	0.0990589400693413	4.07115583521575
231	GE3	UBE2C	2	2019	0.0990589400693413	4.07053844247899
232	GE3	RP11-841O20.2	6	2019	0.297176820208024	4.02673436785225
233	GE3	CT83	8	2019	0.396235760277365	4.00827185621952
234	GE3	PADI1	11	2019	0.544824170381377	3.99298432835954
235	GE3	CKAP2L	2	2019	0.0990589400693413	3.99083267896147
236	GE3	SERPINB5	3	2019	0.148588410104012	3.96544392022043
237	GE3	CCNB2	2	2019	0.0990589400693413	3.95458407198132
238	GE3	BIRC5	2	2019	0.0990589400693413	3.90211836924827
239	GE3	CENPA	2	2019	0.0990589400693413	3.88607865536934
240	GE3	SPC25	2	2019	0.0990589400693413	3.86128084584539
241	GE3	NEK2	1	2019	0.0495294700346706	3.81865251898077
242	GE3	CCNB1	2	2019	0.0990589400693413	3.80005787085136
243	GE3	C21orf58	2	2019	0.0990589400693413	3.79808
244	GE3	MFSD4	1	2019	0.0495294700346706	3.78973602650335
245	GE3	NUF2	2	2019	0.0990589400693413	3.78885865934613
246	GE3	RRM2	2	2019	0.0990589400693413	3.78085435652385
247	GE3	CST6	12	2019	0.594353640416048	3.75900630050399
248	GE3	KRT5	5	2019	0.247647350173353	3.74239769659304
249	GE3	KIF4A	2	2019	0.0990589400693413	3.72504208200002
250	GE3	HLA-G	11	2019	0.544824170381377	3.72272878503616
251	GE3	CENPE	2	2019	0.0990589400693413	3.71396171119314
252	GE3	CDCA8	2	2019	0.0990589400693413	3.69247458291887
253	GE3	ANLN	2	2019	0.0990589400693413	3.67774860872474
254	GE3	C10orf10	7	2019	0.346706290242694	3.66930877772009
255	GE3	S100A9	1	2019	0.0495294700346706	3.66520115604925
256	GE3	PTTG1	2	2019	0.0990589400693413	3.65471337678875
257	GE3	SHCBP1	2	2019	0.0990589400693413	3.62891520491395
258	GE3	KRT6B	3	2019	0.148588410104012	3.62632923119906
259	GE3	RP6-65G23.3	7	2019	0.346706290242694	3.62453182002747
260	GE3	WBSCR16	1	2019	0.0495294700346706	3.6029543129719
261	GE3	TCAF2	1	2019	0.0495294700346706	3.59809708519387
262	GE3	ASPM	2	2019	0.0990589400693413	3.59622514139899
263	GE3	MAD2L1	2	2019	0.0990589400693413	3.59403286481233
264	GE3	KCP	3	2019	0.148588410104012	3.57251470273294
265	GE3	CEP55	1	2019	0.0495294700346706	3.56545985828001
266	GE3	ADIRF	1	2019	0.0495294700346706	3.55430173818787
267	GE3	FAM58A	1	2019	0.0495294700346706	3.54072767806157
268	GE3	AC009005.2	1	2019	0.0495294700346706	3.49579790632036
269	GE3	TCN1	12	2019	0.594353640416048	3.49553012590155
270	GE3	PRR11	2	2019	0.0990589400693413	3.45448911152961
271	GE3	TK1	2	2019	0.0990589400693413	3.44365716661978
272	GE3	NRN1	8	2019	0.396235760277365	3.42855514311635
273	GE3	NMU	1	2019	0.0495294700346706	3.39820465335216
274	GE3	LY6D	11	2019	0.544824170381377	3.38896049824208
275	GE3	MYBL2	2	2019	0.0990589400693413	3.3884339848186
276	GE3	RP3-512B11.3	1	2019	0.0495294700346706	3.37231773926387
277	GE3	UPK3A	6	2019	0.297176820208024	3.35566273553732
278	GE3	FGF11	4	2019	0.198117880138683	3.3492207061083
279	GE3	PVRL1	4	2019	0.198117880138683	3.34206116094442
280	GE3	MND1	2	2019	0.0990589400693413	3.33612857999386
281	GE3	RP11-350J20.12	8	2019	0.396235760277365	3.31929869335596
282	GE3	MKI67	1	2019	0.0495294700346706	3.31373847178704
283	GE3	TOP2A	2	2019	0.0990589400693413	3.30341206556868
284	GE3	LINC00460	3	2019	0.148588410104012	3.2966519295532
285	GE3	S100A5	2	2019	0.0990589400693413	3.29384217035621
286	GE3	VTCN1	8	2019	0.396235760277365	3.29155003725036
287	GE3	CDK1	2	2019	0.0990589400693413	3.29005343895942
288	GE3	CENPW	2	2019	0.0990589400693413	3.28759669693461
289	GE3	TPX2	2	2019	0.0990589400693413	3.27724034963887
290	GE3	PRC1	2	2019	0.0990589400693413	3.27530409100975
291	GE3	TACC3	2	2019	0.0990589400693413	3.26978366360331
292	GE3	KLK6	11	2019	0.544824170381377	3.26897098634876
293	GE3	KRT16	6	2019	0.297176820208024	3.25406488736157
294	GE3	SQRDL	2	2019	0.0990589400693413	3.25307350821212
295	GE3	PVRL4	11	2019	0.544824170381377	3.24162833968293
296	GE3	ATG9B	2	2019	0.0990589400693413	3.22755281902053
297	GE3	RP11-160O5.1	2	2019	0.0990589400693413	3.18818636544828
298	GE3	AC074117.10	2	2019	0.0990589400693413	3.1734442810755
299	GE3	C2orf82	3	2019	0.148588410104012	3.17316083999691
300	GE3	SPAG4	11	2019	0.544824170381377	3.16525282884038
301	GE4	AC098850.3	3	1400	0.214285714285714	6.6640536347404
302	GE4	AC243960.1	1	1400	0.0714285714285714	5.64780248753775
303	GE4	KCNK17	3	1400	0.214285714285714	5.13649446045292
304	GE4	ERN2	3	1400	0.214285714285714	5.03590946199112
305	GE4	THBS4	7	1400	0.5	4.98020663254492
306	GE4	AL844908.1	6	1400	0.428571428571429	4.96710981000749
307	GE4	GRIN2A	6	1400	0.428571428571429	4.88125537622084
308	GE4	AC103706.1	3	1400	0.214285714285714	4.76458731367024
309	GE4	FCRL2	3	1400	0.214285714285714	4.63840171981741
310	GE4	RIMS1	1	1400	0.0714285714285714	4.23855976540186
311	GE4	CCDC144A	3	1400	0.214285714285714	4.16817771553313
312	GE4	PLA2R1	3	1400	0.214285714285714	4.15027272344761
313	GE4	MMP13	1	1400	0.0714285714285714	4.08918062493651
314	GE4	BPIFB1	4	1400	0.285714285714286	4.0845249726087
315	GE4	ANPEP	7	1400	0.5	3.96682859526914
316	GE4	C16orf54	3	1400	0.214285714285714	3.8679658754623
317	GE4	BRINP1	2	1400	0.142857142857143	3.85626032103739
318	GE4	POLR2J3.1	7	1400	0.5	3.80726399558397
319	GE4	AC092683.1	7	1400	0.5	3.80230975540463
320	GE4	GPR68	1	1400	0.0714285714285714	3.70949565186582
321	GE4	LRP2	3	1400	0.214285714285714	3.65014240019963
322	GE4	HIST2H2BF	3	1400	0.214285714285714	3.62437906910882
323	GE4	LUCAT1	7	1400	0.5	3.62238487832634
324	GE4	MRC2	3	1400	0.214285714285714	3.6056483932246
325	GE4	NPIPB5	3	1400	0.214285714285714	3.59827403442116
326	GE4	PCDHGA10	2	1400	0.142857142857143	3.44494462730664
327	GE4	IRAK3	5	1400	0.357142857142857	3.36686729005442
328	GE4	PTPN22	4	1400	0.285714285714286	3.33061276187446
329	GE4	CACNA1D	3	1400	0.214285714285714	3.31346044565288
330	GE4	SCGB3A1	7	1400	0.5	3.25732062451598
331	GE4	MIR29B2CHG	3	1400	0.214285714285714	3.24946890307363
332	GE4	AL928596.1	3	1400	0.214285714285714	3.18661469136716
333	GE4	ITGB2-AS1	3	1400	0.214285714285714	3.18477754862741
334	GE4	CDC42EP5	4	1400	0.285714285714286	3.0763838455297
335	GE4	AL021368.2	5	1400	0.357142857142857	3.0736616191181
336	GE4	PCP4	6	1400	0.428571428571429	3.02512759013174
337	GE4	EFHD1	7	1400	0.5	2.99406221262958
338	GE4	CMYA5	4	1400	0.285714285714286	2.95819434105015
339	GE4	ITGA1	7	1400	0.5	2.94988253344763
340	GE4	GUCY1A1	5	1400	0.357142857142857	2.93582408547102
341	GE4	MUC5B	7	1400	0.5	2.89160861647267
342	GE4	NHS	5	1400	0.357142857142857	2.8804245788637
343	GE4	CP	7	1400	0.5	2.85399973323187
344	GE4	ALOX15B	1	1400	0.0714285714285714	2.81864440269508
345	GE4	SCN9A	2	1400	0.142857142857143	2.77209339698616
346	GE4	KIAA1324	3	1400	0.214285714285714	2.75297442300313
347	GE4	CDH11	7	1400	0.5	2.7441298982834
348	GE4	P2RY6	5	1400	0.357142857142857	2.70614868173951
349	GE4	COL4A3	3	1400	0.214285714285714	2.70254514715117
350	GE4	CDCA7	3	1400	0.214285714285714	2.70149744064082
351	GE4	NRGN	2	1400	0.142857142857143	2.69868685864525
352	GE4	CHI3L1	6	1400	0.428571428571429	2.6936124867074
353	GE4	GFRA3	3	1400	0.214285714285714	2.68904752547277
354	GE4	SHE	1	1400	0.0714285714285714	2.67755022604441
355	GE4	AC005332.7	3	1400	0.214285714285714	2.66282279497871
356	GE4	PLCG2	3	1400	0.214285714285714	2.64742413333541
357	GE4	AC010642.2	3	1400	0.214285714285714	2.63383848358484
358	GE4	SLC1A7	3	1400	0.214285714285714	2.63321677527832
359	GE4	ENG	5	1400	0.357142857142857	2.62868409052087
360	GE4	FTX	7	1400	0.5	2.61865328157153
361	GE4	TRAF5	4	1400	0.285714285714286	2.61624998051371
362	GE4	RBMS3	3	1400	0.214285714285714	2.61076221444831
363	GE4	IGFBP2	1	1400	0.0714285714285714	2.60860743731983
364	GE4	CYSLTR1	1	1400	0.0714285714285714	2.60760023799168
365	GE4	AC130650.2	3	1400	0.214285714285714	2.58665532796664
366	GE4	SYT12	7	1400	0.5	2.58346483659219
367	GE4	CPLANE1	7	1400	0.5	2.58024884526817
368	GE4	INPP5B	3	1400	0.214285714285714	2.54541611208876
369	GE4	HLF	3	1400	0.214285714285714	2.54223150711009
370	GE4	ELF5	3	1400	0.214285714285714	2.52967270603521
371	GE4	ANK3	3	1400	0.214285714285714	2.5166660533231
372	GE4	CACHD1	1	1400	0.0714285714285714	2.49939778354848
373	GE4	GSDMC	1	1400	0.0714285714285714	2.49505021487421
374	GE4	NRP2	3	1400	0.214285714285714	2.48250725609644
375	GE4	IL1R1	7	1400	0.5	2.46854477693858
376	GE4	HECW2	3	1400	0.214285714285714	2.43229480747904
377	GE4	TENT4A	4	1400	0.285714285714286	2.43115089708678
378	GE4	CDKL2	3	1400	0.214285714285714	2.42459283116381
379	GE4	ZNF385B	2	1400	0.142857142857143	2.41272552311013
380	GE4	GLB1L3	3	1400	0.214285714285714	2.40842475765212
381	GE4	TUT7	7	1400	0.5	2.40054644545129
382	GE4	AC009133.1	3	1400	0.214285714285714	2.39649960465537
383	GE4	CSF1	1	1400	0.0714285714285714	2.39627326337324
384	GE4	DELE1	3	1400	0.214285714285714	2.38887951202435
385	GE4	SAMD12	7	1400	0.5	2.38505092478303
386	GE4	DMBT1	1	1400	0.0714285714285714	2.3780932050393
387	GE4	PEBP4	1	1400	0.0714285714285714	2.35977372310891
388	GE4	AC004951.1	3	1400	0.214285714285714	2.35648
389	GE4	LRRC75A	2	1400	0.142857142857143	2.35573120764659
390	GE4	LGSN	3	1400	0.214285714285714	2.35031717952487
391	GE4	ST3GAL1	3	1400	0.214285714285714	2.34089005397346
392	GE4	DEPP1	3	1400	0.214285714285714	2.33899502208357
393	GE4	ARHGEF38	5	1400	0.357142857142857	2.32866678019013
394	GE4	CEMIP2	1	1400	0.0714285714285714	2.32757185166955
395	GE4	KDR	4	1400	0.285714285714286	2.31423566828282
396	GE4	FAM20A	5	1400	0.357142857142857	2.31034830386383
397	GE4	PTPRG	7	1400	0.5	2.30608426223446
398	GE4	PLTP	7	1400	0.5	2.29861221371704
399	GE4	TENT2	7	1400	0.5	2.27901870790864
400	GE4	TMEM132A	3	1400	0.214285714285714	2.27607790687449
401	GE5	AC027117.2	3	1766	0.169875424688562	4.73707539870567
402	GE5	CES1	1	1766	0.0566251415628539	4.65113620126447
403	GE5	FGG	1	1766	0.0566251415628539	4.43197748688461
404	GE5	SCGB3A2	10	1766	0.566251415628539	3.79473630253731
405	GE5	FEZF1	1	1766	0.0566251415628539	3.69926252328374
406	GE5	SPINK1	10	1766	0.566251415628539	3.64627312611814
407	GE5	TXLNGY	7	1766	0.396375990939977	3.61485966067075
408	GE5	AC108215.1	2	1766	0.113250283125708	3.60738305689202
409	GE5	AP001972.5	4	1766	0.226500566251416	3.36284572801624
410	GE5	AC027117.1	7	1766	0.396375990939977	3.36121329018117
411	GE5	SCGB3A1	2	1766	0.113250283125708	3.25732062451598
412	GE5	FCER1G	1	1766	0.0566251415628539	3.24543669761993
413	GE5	AL162511.1	10	1766	0.566251415628539	3.23962209639888
414	GE5	SPINK5	8	1766	0.453001132502831	3.19552817573718
415	GE5	C4BPA	1	1766	0.0566251415628539	3.15382771889411
416	GE5	VSIG1	5	1766	0.28312570781427	3.13975826677593
417	GE5	AC004556.1	7	1766	0.396375990939977	3.08609827092438
418	GE5	FEZF1-AS1	4	1766	0.226500566251416	3.06637675385425
419	GE5	CACNA2D2	1	1766	0.0566251415628539	3.00383253698612
420	GE5	U62317.5	4	1766	0.226500566251416	2.98242549651118
421	GE5	AL355312.4	5	1766	0.28312570781427	2.95884392907509
422	GE5	ALOX15B	2	1766	0.113250283125708	2.81864440269508
423	GE5	CFB	4	1766	0.226500566251416	2.81418326659643
424	GE5	C5	3	1766	0.169875424688562	2.80451614443322
425	GE5	KCNJ15	2	1766	0.113250283125708	2.79507970542006
426	GE5	AQP4	3	1766	0.169875424688562	2.70962515423949
427	GE5	NRGN	1	1766	0.0566251415628539	2.69868685864525
428	GE5	PPP1R1C	2	1766	0.113250283125708	2.67843309402066
429	GE5	HHLA2	7	1766	0.396375990939977	2.67143415223405
430	GE5	PLA2G10	9	1766	0.509626274065685	2.66331251084079
431	GE5	AL135999.3	2	1766	0.113250283125708	2.66272942283962
432	GE5	ACSM3	6	1766	0.339750849377123	2.65787579883232
433	GE5	GSTA1	6	1766	0.339750849377123	2.65307124010334
434	GE5	SFTPD	3	1766	0.169875424688562	2.61893383064851
435	GE5	FTX	2	1766	0.113250283125708	2.61865328157153
436	GE5	HLA-DOA	2	1766	0.113250283125708	2.60717829612179
437	GE5	ALDH1A1	8	1766	0.453001132502831	2.60598786032176
438	GE5	WFDC21P	5	1766	0.28312570781427	2.58743790101181
439	GE5	AC020978.5	3	1766	0.169875424688562	2.58605106655948
440	GE5	AQP1	1	1766	0.0566251415628539	2.57810596259476
441	GE5	AC244090.1	9	1766	0.509626274065685	2.55716805709608
442	GE5	SNHG9	2	1766	0.113250283125708	2.55343844459087
443	GE5	EIF1AY	7	1766	0.396375990939977	2.50277268335685
444	GE5	SOCS2	1	1766	0.0566251415628539	2.47317192873704
445	GE5	SFTPA1	2	1766	0.113250283125708	2.4338222298362
446	GE5	HABP2	3	1766	0.169875424688562	2.40270212296221
447	GE5	AC009133.1	2	1766	0.113250283125708	2.39649960465537
448	GE5	LRRK2	8	1766	0.453001132502831	2.37401508743281
449	GE5	TUT4	1	1766	0.0566251415628539	2.35042976705785
450	GE5	AC007405.3	5	1766	0.28312570781427	2.34180291971892
451	GE5	HAGLR	1	1766	0.0566251415628539	2.33020328314429
452	GE5	HLA-DOB	2	1766	0.113250283125708	2.31235036103781
453	GE5	SLC4A2	2	1766	0.113250283125708	2.27403110493694
454	GE5	HOXD1	1	1766	0.0566251415628539	2.27253583951177
455	GE5	SFTPA2	3	1766	0.169875424688562	2.26673460547931
456	GE5	STXBP1	1	1766	0.0566251415628539	2.25609712189797
457	GE5	IL37	3	1766	0.169875424688562	2.25057812531222
458	GE5	GGT5	3	1766	0.169875424688562	2.24902972448902
459	GE5	SMIM37	9	1766	0.509626274065685	2.23236043518864
460	GE5	AC092071.1	2	1766	0.113250283125708	2.22124844258067
461	GE5	NELL1	3	1766	0.169875424688562	2.22067592490523
462	GE5	MAPK10	3	1766	0.169875424688562	2.21072291821801
463	GE5	SELENOP	10	1766	0.566251415628539	2.20748134142519
464	GE5	CTSE	1	1766	0.0566251415628539	2.20180489336095
465	GE5	NR4A1	4	1766	0.226500566251416	2.19374653246876
466	GE5	MUC20-OT1	2	1766	0.113250283125708	2.1916731116492
467	GE5	HSD17B6	4	1766	0.226500566251416	2.19064826978795
468	GE5	GOLGA2P7	9	1766	0.509626274065685	2.19025396014354
469	GE5	PSMB10	7	1766	0.396375990939977	2.1860466104779
470	GE5	C1orf116	1	1766	0.0566251415628539	2.18467554096807
471	GE5	MEF2C	1	1766	0.0566251415628539	2.18300749139652
472	GE5	POLR2J3-1	7	1766	0.396375990939977	2.16894205245828
473	GE5	SERPINA1	8	1766	0.453001132502831	2.14425723631002
474	GE5	DNAJC12	7	1766	0.396375990939977	2.13243660225461
475	GE5	MACO1	2	1766	0.113250283125708	2.10814096349235
476	GE5	CRYM	8	1766	0.453001132502831	2.10518533725487
477	GE5	ROS1	1	1766	0.0566251415628539	2.10445255084431
478	GE5	HLA-DQA2	8	1766	0.453001132502831	2.09743955275723
479	GE5	COLCA1	4	1766	0.226500566251416	2.07856458007443
480	GE5	RPS4Y1	7	1766	0.396375990939977	2.07630189766982
481	GE5	TMEM176B	8	1766	0.453001132502831	2.07314274632042
482	GE5	IRX2	2	1766	0.113250283125708	2.06704254775237
483	GE5	SCTR	3	1766	0.169875424688562	2.06567964959688
484	GE5	BMP3	10	1766	0.566251415628539	2.04882252044498
485	GE5	ALDH2	1	1766	0.0566251415628539	2.04706296318304
486	GE5	SUSD2	5	1766	0.28312570781427	2.0433295235969
487	GE5	DLC1	1	1766	0.0566251415628539	2.03784539943046
488	GE5	TMEM176A	7	1766	0.396375990939977	2.03418898188297
489	GE5	TP53I11	2	1766	0.113250283125708	2.0241124335599
490	GE5	C11orf96	5	1766	0.28312570781427	2.01291856063072
491	GE5	ANKRD29	2	1766	0.113250283125708	2.01253077632545
492	GE5	GSTA4	7	1766	0.396375990939977	2.00904680538695
493	GE5	CYP4B1	4	1766	0.226500566251416	1.99747835938658
494	GE5	BX284668.5	7	1766	0.396375990939977	1.99746236744501
495	GE5	ABCA3	7	1766	0.396375990939977	1.99477588702166
496	GE5	NUPR1	6	1766	0.339750849377123	1.99049877131244
497	GE5	RAB5IF	9	1766	0.509626274065685	1.98385077108226
498	GE5	DANCR	3	1766	0.169875424688562	1.97884990646621
499	GE5	RCAN2	2	1766	0.113250283125708	1.97873224321331
500	GE5	MMP15	2	1766	0.113250283125708	1.97610892870538
501	GE6	TMPRSS11B	3	941	0.318809776833156	9.55717571824203
502	GE6	SPRR3	3	941	0.318809776833156	9.10721876041541
503	GE6	S100A7	3	941	0.318809776833156	8.5185063440475
504	GE6	AMTN	4	941	0.425079702444208	7.84349234830098
505	GE6	C10orf99	4	941	0.425079702444208	7.78817280166098
506	GE6	STATH	5	941	0.53134962805526	7.5843764328817
507	GE6	SERPINB4	3	941	0.318809776833156	7.58387782139004
508	GE6	LINC02042	4	941	0.425079702444208	7.31467976151975
509	GE6	SERPINB13	4	941	0.425079702444208	7.27068701093986
510	GE6	LINC00392	4	941	0.425079702444208	7.23111404653523
511	GE6	SPRR1B	3	941	0.318809776833156	7.11014716216366
512	GE6	SERPINB3	4	941	0.425079702444208	7.03909839846187
513	GE6	CLCA4	5	941	0.53134962805526	6.98881745151722
514	GE6	KRT31	5	941	0.53134962805526	6.95460151945229
515	GE6	MMP3	4	941	0.425079702444208	6.90988248681855
516	GE6	SPRR2D	3	941	0.318809776833156	6.84669498312616
517	GE6	SERPINB2	3	941	0.318809776833156	6.81077825566011
518	GE6	RHCG	1	941	0.106269925611052	6.62605293985576
519	GE6	CLCA3P	5	941	0.53134962805526	6.58634128685587
520	GE6	GJB6	3	941	0.318809776833156	6.44339039321935
521	GE6	APOBEC3A	3	941	0.318809776833156	6.43721442367122
522	GE6	TMPRSS11A	5	941	0.53134962805526	6.34434823505033
523	GE6	SPRR2A	5	941	0.53134962805526	6.31061769419845
524	GE6	SPRR2E	2	941	0.212539851222104	6.28261445408178
525	GE6	KRT13	5	941	0.53134962805526	6.06305413385837
526	GE6	DSG3	5	941	0.53134962805526	5.74580808096098
527	GE6	LUM	5	941	0.53134962805526	5.6716882328798
528	GE6	DCN	5	941	0.53134962805526	5.66065167954811
529	GE6	AC036176.3	1	941	0.106269925611052	5.5888796406399
530	GE6	SBSN	1	941	0.106269925611052	5.58716834724422
531	GE6	C12orf54	4	941	0.425079702444208	5.55749573259946
532	GE6	GBP6	2	941	0.212539851222104	5.55578474990419
533	GE6	CSTA	5	941	0.53134962805526	5.55044123166212
534	GE6	ZNF365	1	941	0.106269925611052	5.48058507227715
535	GE6	S100A8	5	941	0.53134962805526	5.47939331841891
536	GE6	HCAR3	5	941	0.53134962805526	5.37691195464998
537	GE6	C5orf66-AS1	4	941	0.425079702444208	5.37530240582429
538	GE6	FST	5	941	0.53134962805526	5.31515660441761
539	GE6	CLCA2	3	941	0.318809776833156	5.31154042442839
540	GE6	S100A12	2	941	0.212539851222104	5.27518361753106
541	GE6	TMPRSS11D	5	941	0.53134962805526	5.19895333214854
542	GE6	SLC22A20P	3	941	0.318809776833156	5.15383952586732
543	GE6	FDCSP	1	941	0.106269925611052	5.12591322758806
544	GE6	DSC3	5	941	0.53134962805526	5.05932662430254
545	GE6	LINC02154	1	941	0.106269925611052	4.98821917307392
546	GE6	LRMP	2	941	0.212539851222104	4.97282188967842
547	GE6	MIR205HG	5	941	0.53134962805526	4.90688969633653
548	GE6	GJB2	4	941	0.425079702444208	4.8603523009419
549	GE6	ALDH3A1	5	941	0.53134962805526	4.85696200441476
550	GE6	FFAR2	2	941	0.212539851222104	4.83494266505087
551	GE6	EDN2	4	941	0.425079702444208	4.78807120643249
552	GE6	FUT6	3	941	0.318809776833156	4.76059087643102
553	GE6	SNAI2	5	941	0.53134962805526	4.75906282567068
554	GE6	TSLP	5	941	0.53134962805526	4.70680567899571
555	GE6	DAPL1	4	941	0.425079702444208	4.68532823493249
556	GE6	AC244153.1	1	941	0.106269925611052	4.68050417786807
557	GE6	PITX1	5	941	0.53134962805526	4.67441389519658
558	GE6	PRKY	5	941	0.53134962805526	4.62753299989173
559	GE6	KRT15	5	941	0.53134962805526	4.59056667266105
560	GE6	KRT17	5	941	0.53134962805526	4.55511000775108
561	GE6	UPK1B	1	941	0.106269925611052	4.52163040092224
562	GE6	VNN2	2	941	0.212539851222104	4.40356605708191
563	GE6	CALML3	5	941	0.53134962805526	4.39524048222526
564	GE6	CYP1A1	2	941	0.212539851222104	4.38809072356035
565	GE6	UGT2B7	2	941	0.212539851222104	4.35575569220044
566	GE6	KRT14	2	941	0.212539851222104	4.34409000187796
567	GE6	VNN1	3	941	0.318809776833156	4.34263402538818
568	GE6	HCAR2	3	941	0.318809776833156	4.33180798657485
569	GE6	ADH1C	5	941	0.53134962805526	4.31593559200127
570	GE6	ZG16B	2	941	0.212539851222104	4.30682558341111
571	GE6	PITX2	4	941	0.425079702444208	4.27842437488063
572	GE6	ARNTL2	3	941	0.318809776833156	4.21867534188308
573	GE6	MMP12	5	941	0.53134962805526	4.17365636933702
574	GE6	KRT23	4	941	0.425079702444208	4.12359075603309
575	GE6	NTS	5	941	0.53134962805526	4.09505035400095
576	GE6	MMP13	5	941	0.53134962805526	4.08918062493651
577	GE6	P2RY1	2	941	0.212539851222104	4.08096901410656
578	GE6	CLDN1	5	941	0.53134962805526	4.04064679226529
579	GE6	SERPINB5	5	941	0.53134962805526	3.96544392022043
580	GE6	RNF39	3	941	0.318809776833156	3.95225573783344
581	GE6	FABP5	5	941	0.53134962805526	3.94261957885294
582	GE6	DHRS9	2	941	0.212539851222104	3.91714763256436
583	GE6	CRYAB	3	941	0.318809776833156	3.90726555141167
584	GE6	WDR72	4	941	0.425079702444208	3.90540482637749
585	GE6	PLAC8	5	941	0.53134962805526	3.89232037885783
586	GE6	TINCR	5	941	0.53134962805526	3.8584886969649
587	GE6	LAYN	4	941	0.425079702444208	3.82594488408939
588	GE6	PRSS27	1	941	0.106269925611052	3.80867602494398
589	GE6	CA2	5	941	0.53134962805526	3.80556004352391
590	GE6	TYMP	5	941	0.53134962805526	3.78187822058527
591	GE6	FAM83D	1	941	0.106269925611052	3.77409090596823
592	GE6	LSP1	4	941	0.425079702444208	3.77106944208235
593	GE6	LPAR6	2	941	0.212539851222104	3.75423449391518
594	GE6	KRT5	5	941	0.53134962805526	3.74239769659304
595	GE6	KDM7A-DT	2	941	0.212539851222104	3.74226
596	GE6	DKK1	4	941	0.425079702444208	3.72533719955631
597	GE6	CLEC2B	5	941	0.53134962805526	3.72334136179798
598	GE6	S100A9	5	941	0.53134962805526	3.66520115604925
599	GE6	PKP1	2	941	0.212539851222104	3.66252027302505
600	GE6	TP63	4	941	0.425079702444208	3.63537462562658
601	GE7	LINC01207	1	1059	0.0944287063267233	6.53113148426902
602	GE7	SGOL1	1	1059	0.0944287063267233	6.1649138021345
603	GE7	FMO3	1	1059	0.0944287063267233	5.68291006018885
604	GE7	HOXB-AS3	5	1059	0.472143531633617	5.35731005461102
605	GE7	RP11-1260E13.1	4	1059	0.377714825306893	5.26946531747295
606	GE7	FAM133A	1	1059	0.0944287063267233	5.21833371044546
607	GE7	FABP7	2	1059	0.188857412653447	4.81922562736163
608	GE7	KIAA0101	1	1059	0.0944287063267233	4.65963535242108
609	GE7	PLK1	1	1059	0.0944287063267233	4.63831727981136
610	GE7	FAM188B	4	1059	0.377714825306893	4.52198502386892
611	GE7	AC093627.10	1	1059	0.0944287063267233	4.5175626202539
612	GE7	HMMR	1	1059	0.0944287063267233	4.34912304287352
613	GE7	CDCA3	1	1059	0.0944287063267233	4.31235146713253
614	GE7	RP11-357H14.17	2	1059	0.188857412653447	4.29630101775561
615	GE7	AURKB	1	1059	0.0944287063267233	4.26749321711556
616	GE7	LINC01436	1	1059	0.0944287063267233	4.24273413080072
617	GE7	CDKN3	1	1059	0.0944287063267233	4.24098
618	GE7	CDC20	1	1059	0.0944287063267233	4.18584418509457
619	GE7	DLGAP5	1	1059	0.0944287063267233	4.18220895027348
620	GE7	FAM134B	2	1059	0.188857412653447	4.15716230971393
621	GE7	PBK	1	1059	0.0944287063267233	4.15234723975145
622	GE7	KRT23	1	1059	0.0944287063267233	4.12359075603309
623	GE7	CCNA2	1	1059	0.0944287063267233	4.1186455785344
624	GE7	SPAG5	1	1059	0.0944287063267233	4.09763389945882
625	GE7	UBE2C	1	1059	0.0944287063267233	4.07053844247899
626	GE7	FOXM1	1	1059	0.0944287063267233	4.06787424712195
627	GE7	POC1A	1	1059	0.0944287063267233	3.98715241160332
628	GE7	CCNB2	1	1059	0.0944287063267233	3.95458407198132
629	GE7	AC159540.1	1	1059	0.0944287063267233	3.92964601314825
630	GE7	BIRC5	1	1059	0.0944287063267233	3.90211836924827
631	GE7	HOXA-AS2	4	1059	0.377714825306893	3.89221178985587
632	GE7	CENPA	1	1059	0.0944287063267233	3.88607865536934
633	GE7	SPC25	1	1059	0.0944287063267233	3.86128084584539
634	GE7	CCNB1	1	1059	0.0944287063267233	3.80005787085136
635	GE7	MFSD4	4	1059	0.377714825306893	3.78973602650335
636	GE7	RRM2	1	1059	0.0944287063267233	3.78085435652385
637	GE7	FCGBP	1	1059	0.0944287063267233	3.76909717006203
638	GE7	HOXB8	4	1059	0.377714825306893	3.75377319195273
639	GE7	KIF4A	1	1059	0.0944287063267233	3.72504208200002
640	GE7	PTPRT	2	1059	0.188857412653447	3.70115569604235
641	GE7	NPB	2	1059	0.188857412653447	3.69865353421911
642	GE7	CDCA8	1	1059	0.0944287063267233	3.69247458291887
643	GE7	CTA-293F17.1	1	1059	0.0944287063267233	3.68038706776122
644	GE7	FAM92A1	4	1059	0.377714825306893	3.67967657593476
645	GE7	ANLN	1	1059	0.0944287063267233	3.67774860872474
646	GE7	S100A9	1	1059	0.0944287063267233	3.66520115604925
647	GE7	PTTG1	1	1059	0.0944287063267233	3.65471337678875
648	GE7	SHCBP1	1	1059	0.0944287063267233	3.62891520491395
649	GE7	ASF1B	1	1059	0.0944287063267233	3.62450726303643
650	GE7	CENPM	1	1059	0.0944287063267233	3.62098820764177
651	GE7	WBSCR16	2	1059	0.188857412653447	3.6029543129719
652	GE7	MAD2L1	1	1059	0.0944287063267233	3.59403286481233
653	GE7	HOTAIRM1	5	1059	0.472143531633617	3.58786078587635
654	GE7	FAM58A	2	1059	0.188857412653447	3.54072767806157
655	GE7	HOXB3	3	1059	0.28328611898017	3.48897349100112
656	GE7	S100A1	1	1059	0.0944287063267233	3.48797764847087
657	GE7	ATP6V1C2	3	1059	0.28328611898017	3.48328327645609
658	GE7	CLSPN	1	1059	0.0944287063267233	3.47914912817224
659	GE7	TK1	1	1059	0.0944287063267233	3.44365716661978
660	GE7	NRN1	1	1059	0.0944287063267233	3.42855514311635
661	GE7	INADL	1	1059	0.0944287063267233	3.41710413951589
662	GE7	AKR1B1	2	1059	0.188857412653447	3.4140686274545
663	GE7	TFPI2	5	1059	0.472143531633617	3.40884675883521
664	GE7	NMU	5	1059	0.472143531633617	3.39820465335216
665	GE7	SOX11	1	1059	0.0944287063267233	3.38272390995659
666	GE7	C1orf106	1	1059	0.0944287063267233	3.37961606817817
667	GE7	MND1	1	1059	0.0944287063267233	3.33612857999386
668	GE7	RPL39L	1	1059	0.0944287063267233	3.33532804921371
669	GE7	FNDC4	3	1059	0.28328611898017	3.32254196512348
670	GE7	MKI67	1	1059	0.0944287063267233	3.31373847178704
671	GE7	TOP2A	1	1059	0.0944287063267233	3.30341206556868
672	GE7	S100A5	4	1059	0.377714825306893	3.29384217035621
673	GE7	CDK1	1	1059	0.0944287063267233	3.29005343895942
674	GE7	CENPW	1	1059	0.0944287063267233	3.28759669693461
675	GE7	TRIP13	1	1059	0.0944287063267233	3.28323562084677
676	GE7	PRC1	1	1059	0.0944287063267233	3.27530409100975
677	GE7	TACC3	1	1059	0.0944287063267233	3.26978366360331
678	GE7	CCDC109B	4	1059	0.377714825306893	3.25519748344364
679	GE7	SLC35G2	2	1059	0.188857412653447	3.24757269084844
680	GE7	PVRL4	1	1059	0.0944287063267233	3.24162833968293
681	GE7	SLC6A3	4	1059	0.377714825306893	3.23647168424269
682	GE7	C8orf4	6	1059	0.56657223796034	3.21759165984211
683	GE7	CENPK	1	1059	0.0944287063267233	3.19334044805007
684	GE7	SKAP1	3	1059	0.28328611898017	3.18062501585401
685	GE7	RP11-44F21.5	2	1059	0.188857412653447	3.1770959404085
686	GE7	HOXB6	4	1059	0.377714825306893	3.15313808104954
687	GE7	ZC3H11A	1	1059	0.0944287063267233	3.1368032219937
688	GE7	HOXB4	2	1059	0.188857412653447	3.1229866614398
689	GE7	CENPF	1	1059	0.0944287063267233	3.12121360161482
690	GE7	HN1L	2	1059	0.188857412653447	3.10624699253207
691	GE7	NUSAP1	1	1059	0.0944287063267233	3.10481682330694
692	GE7	ICAM2	2	1059	0.188857412653447	3.08971353057385
693	GE7	TYMS	1	1059	0.0944287063267233	3.08935105806134
694	GE7	FAM134A	3	1059	0.28328611898017	3.07686389101654
695	GE7	HOXB2	5	1059	0.472143531633617	3.07410565247028
696	GE7	ARPC1B	5	1059	0.472143531633617	3.06869607706839
697	GE7	BMP4	1	1059	0.0944287063267233	3.05801165687523
698	GE7	MCM7	1	1059	0.0944287063267233	3.05764467828501
699	GE7	TSHZ2	1	1059	0.0944287063267233	3.0569946698796
700	GE7	C7orf49	2	1059	0.188857412653447	3.05085776452341
701	GE8	GPT	2	1200	0.166666666666667	5.9220896364908
702	GE8	HSPA14.1	1	1200	0.0833333333333333	5.91622991494537
703	GE8	MMP23B	1	1200	0.0833333333333333	5.82992556455586
704	GE8	AC022613.1	1	1200	0.0833333333333333	5.73166138282706
705	GE8	PRSS3	3	1200	0.25	5.62098176624851
706	GE8	LINC02577	2	1200	0.166666666666667	5.57197455826363
707	GE8	AC245595.1	6	1200	0.5	5.44394659420296
708	GE8	CXCL9	1	1200	0.0833333333333333	4.96851706085279
709	GE8	TEN1	1	1200	0.0833333333333333	4.84117367400736
710	GE8	FAM50B	1	1200	0.0833333333333333	4.74925333835268
711	GE8	CACNA2D1	1	1200	0.0833333333333333	4.67338703232477
712	GE8	AC092803.2	1	1200	0.0833333333333333	4.46225585953907
713	GE8	RETREG1	1	1200	0.0833333333333333	4.33274293262022
714	GE8	TPM2	6	1200	0.5	4.15235999187998
715	GE8	BARX1	3	1200	0.25	3.83757122246671
716	GE8	POLR2J3.1	6	1200	0.5	3.80726399558397
717	GE8	UCHL1	6	1200	0.5	3.76694432138288
718	GE8	AL133453.1	6	1200	0.5	3.74527612632667
719	GE8	OXCT1	1	1200	0.0833333333333333	3.74498693255934
720	GE8	NRCAM	2	1200	0.166666666666667	3.69722686365862
721	GE8	AOC1	1	1200	0.0833333333333333	3.62883451625005
722	GE8	AKR1B10	2	1200	0.166666666666667	3.57118044027619
723	GE8	SCG5	1	1200	0.0833333333333333	3.5649885917111
724	GE8	CLGN	1	1200	0.0833333333333333	3.52099204206853
725	GE8	ANO1	1	1200	0.0833333333333333	3.48810584483985
726	GE8	MYEOV	1	1200	0.0833333333333333	3.48776208692766
727	GE8	MELTF	6	1200	0.5	3.47999902696929
728	GE8	SLC38A5	4	1200	0.333333333333333	3.4714939079377
729	GE8	FKBP10	2	1200	0.166666666666667	3.42392148119725
730	GE8	DEFB1	3	1200	0.25	3.41257279870835
731	GE8	GBP1	6	1200	0.5	3.33270923388586
732	GE8	PSIP1	1	1200	0.0833333333333333	3.32086492008684
733	GE8	LINC02001	1	1200	0.0833333333333333	3.29335261393263
734	GE8	TNFRSF25	1	1200	0.0833333333333333	3.27651051483759
735	GE8	KLK6	4	1200	0.333333333333333	3.26897098634876
736	GE8	TUSC1	1	1200	0.0833333333333333	3.23553335483315
737	GE8	MLLT11	2	1200	0.166666666666667	3.22822957137255
738	GE8	CMBL	1	1200	0.0833333333333333	3.13204232060518
739	GE8	FUOM	1	1200	0.0833333333333333	3.09034746685059
740	GE8	CTHRC1	6	1200	0.5	3.01151452142777
741	GE8	EXOSC3	1	1200	0.0833333333333333	2.98701950022237
742	GE8	MMP7	5	1200	0.416666666666667	2.95666524836164
743	GE8	LYPD1	5	1200	0.416666666666667	2.95246242871948
744	GE8	CCL28	1	1200	0.0833333333333333	2.92500295384426
745	GE8	ILF3-DT	1	1200	0.0833333333333333	2.90290216115507
746	GE8	FN1	5	1200	0.416666666666667	2.85988152529416
747	GE8	C4BPB	2	1200	0.166666666666667	2.85821583163448
748	GE8	SLC7A11	3	1200	0.25	2.85293736147788
749	GE8	PLIN2	1	1200	0.0833333333333333	2.84974740622627
750	GE8	RHOF	6	1200	0.5	2.83466342302763
751	GE8	CCDC88A	2	1200	0.166666666666667	2.82377774160869
752	GE8	CSRP2	1	1200	0.0833333333333333	2.80817505953788
753	GE8	CYP24A1	5	1200	0.416666666666667	2.7484478647068
754	GE8	SLC16A1	2	1200	0.166666666666667	2.73029552691117
755	GE8	STOML2	1	1200	0.0833333333333333	2.72665212165345
756	GE8	P2RY6	1	1200	0.0833333333333333	2.70614868173951
757	GE8	GPX2	6	1200	0.5	2.70450793751353
758	GE8	AC118549.1	2	1200	0.166666666666667	2.68588399052357
759	GE8	CYREN	5	1200	0.416666666666667	2.6761422250328
760	GE8	ASRGL1	1	1200	0.0833333333333333	2.66170897583897
761	GE8	EIF4EBP1	1	1200	0.0833333333333333	2.66021512963294
762	GE8	HSD17B1	3	1200	0.25	2.65719867364119
763	GE8	AC023157.3	1	1200	0.0833333333333333	2.63974932540651
764	GE8	AC010642.2	3	1200	0.25	2.63383848358484
765	GE8	TXNRD1	6	1200	0.5	2.63072716316091
766	GE8	UBE2S	6	1200	0.5	2.59448070623169
767	GE8	MDFIC	1	1200	0.0833333333333333	2.58470681302955
768	GE8	ACYP1	1	1200	0.0833333333333333	2.58006333854294
769	GE8	RAB30-AS1	1	1200	0.0833333333333333	2.57203135493303
770	GE8	CIB2	1	1200	0.0833333333333333	2.56028345557343
771	GE8	FBH1	1	1200	0.0833333333333333	2.55771292046445
772	GE8	TRAPPC2B	4	1200	0.333333333333333	2.55654249686731
773	GE8	AKR1C3	6	1200	0.5	2.54753239265205
774	GE8	DCTN3	1	1200	0.0833333333333333	2.54402332061532
775	GE8	PLCB1	1	1200	0.0833333333333333	2.52671680228277
776	GE8	GCLC	1	1200	0.0833333333333333	2.52640434913786
777	GE8	EMC9	1	1200	0.0833333333333333	2.5157946740569
778	GE8	IGLC2	1	1200	0.0833333333333333	2.51540262062332
779	GE8	NAMPT	3	1200	0.25	2.4845218969014
780	GE8	AHNAK2	5	1200	0.416666666666667	2.48267064483387
781	GE8	NRP2	5	1200	0.416666666666667	2.48250725609644
782	GE8	MCUB	3	1200	0.25	2.47491015348588
783	GE8	HLTF	6	1200	0.5	2.46709526231152
784	GE8	CFD	1	1200	0.0833333333333333	2.44198575382477
785	GE8	COTL1	1	1200	0.0833333333333333	2.4312076325748
786	GE8	EPHB2	5	1200	0.416666666666667	2.42507594880349
787	GE8	AC058791.1	2	1200	0.166666666666667	2.38973357983963
788	GE8	CALD1	6	1200	0.5	2.35553818888299
789	GE8	TUT4	1	1200	0.0833333333333333	2.35042976705785
790	GE8	CEMIP2	6	1200	0.5	2.32757185166955
791	GE8	KDR	5	1200	0.416666666666667	2.31423566828282
792	GE8	TAP1	1	1200	0.0833333333333333	2.31333211193129
793	GE8	PLTP	5	1200	0.416666666666667	2.29861221371704
794	GE8	BAG1	1	1200	0.0833333333333333	2.29328948375217
795	GE8	IGF2BP2	5	1200	0.416666666666667	2.29122106945424
796	GE8	LY6K	6	1200	0.5	2.28595903057833
797	GE8	TMEM132A	1	1200	0.0833333333333333	2.27607790687449
798	GE8	AC245297.3	6	1200	0.5	2.27484724173158
799	GE8	SRGAP1	2	1200	0.166666666666667	2.27213600915093
800	GE8	IFI44L	4	1200	0.333333333333333	2.27154293514793
801	GE9	INSL4	1	1400	0.0714285714285714	12.2516975276675
802	GE9	C4orf45	1	1400	0.0714285714285714	10.6133359814611
803	GE9	FZD10-AS1	1	1400	0.0714285714285714	10.4209900340335
804	GE9	CPS1	1	1400	0.0714285714285714	10.4125840616308
805	GE9	RSPO3	1	1400	0.0714285714285714	10.254793652374
806	GE9	NOS1	1	1400	0.0714285714285714	9.69198022683918
807	GE9	IGLV1-44	1	1400	0.0714285714285714	9.14716696704886
808	GE9	MUC5AC	1	1400	0.0714285714285714	8.93927391438317
809	GE9	FGA	1	1400	0.0714285714285714	8.93038765916274
810	GE9	PAH	1	1400	0.0714285714285714	8.7765864243989
811	GE9	NTNG1	1	1400	0.0714285714285714	8.77365007852221
812	GE9	IGKV1-5	1	1400	0.0714285714285714	8.74037871115863
813	GE9	CYP2T1P	1	1400	0.0714285714285714	8.71378113832695
814	GE9	OPCML	1	1400	0.0714285714285714	8.57765802211442
815	GE9	LINC01468	1	1400	0.0714285714285714	8.49028968295766
816	GE9	FGB	1	1400	0.0714285714285714	8.39339540029679
817	GE9	AKR1C2	1	1400	0.0714285714285714	7.98440163125896
818	GE9	CLDN5	1	1400	0.0714285714285714	7.97196611404695
819	GE9	TM4SF4	1	1400	0.0714285714285714	7.79179672902658
820	GE9	GKN2	3	1400	0.214285714285714	7.67759653255931
821	GE9	KRT81	1	1400	0.0714285714285714	7.15231843254404
822	GE9	CLDN18	3	1400	0.214285714285714	6.96070334738759
823	GE9	VGLL3	1	1400	0.0714285714285714	6.87763553592146
824	GE9	JAKMIP2	1	1400	0.0714285714285714	6.63968630213494
825	GE9	FAM83A-AS1	1	1400	0.0714285714285714	6.61804551707476
826	GE9	IGHM	1	1400	0.0714285714285714	6.50640072335312
827	GE9	CSGALNACT1	1	1400	0.0714285714285714	6.39379380409486
828	GE9	OLFML3	2	1400	0.142857142857143	6.37691611184922
829	GE9	HP	1	1400	0.0714285714285714	6.34308908685088
830	GE9	WDR86-AS1	1	1400	0.0714285714285714	6.19439945611216
831	GE9	AC079062.1	1	1400	0.0714285714285714	6.15636655706723
832	GE9	HAL	1	1400	0.0714285714285714	6.13766135724239
833	GE9	PGR	1	1400	0.0714285714285714	6.13497774864607
834	GE9	COL15A1	1	1400	0.0714285714285714	6.09951847718512
835	GE9	GRAMD1B	1	1400	0.0714285714285714	6.09841152331292
836	GE9	MDGA1	1	1400	0.0714285714285714	5.93372232274135
837	GE9	TFF1	1	1400	0.0714285714285714	5.93249452512562
838	GE9	BRDT	1	1400	0.0714285714285714	5.89290892303414
839	GE9	CHI3L2	1	1400	0.0714285714285714	5.87009333340363
840	GE9	MUC13	1	1400	0.0714285714285714	5.83545530076954
841	GE9	FAM177B	1	1400	0.0714285714285714	5.79521300582028
842	GE9	LHX9	1	1400	0.0714285714285714	5.66417141632015
843	GE9	KCND1	1	1400	0.0714285714285714	5.62264744460509
844	GE9	FCGR3B	1	1400	0.0714285714285714	5.58356206793804
845	GE9	LRRN4	1	1400	0.0714285714285714	5.57810714169407
846	GE9	RXRG	1	1400	0.0714285714285714	5.44344846343999
847	GE9	CLDN6	2	1400	0.142857142857143	5.43418753981253
848	GE9	LRRC25	1	1400	0.0714285714285714	5.39747707435532
849	GE9	TNS4	1	1400	0.0714285714285714	5.29240010419741
850	GE9	BZW1P2	1	1400	0.0714285714285714	5.13418592399696
851	GE9	OLR1	4	1400	0.285714285714286	5.13326616933206
852	GE9	MAGEA1	1	1400	0.0714285714285714	5.10548215866097
853	GE9	CPNE5	1	1400	0.0714285714285714	5.07536063840646
854	GE9	BCAS1	1	1400	0.0714285714285714	5.04433763287202
855	GE9	CD207	1	1400	0.0714285714285714	5.03558391959612
856	GE9	DUSP4	1	1400	0.0714285714285714	5.02064920541011
857	GE9	AGER	3	1400	0.214285714285714	4.98655154498334
858	GE9	FURIN	1	1400	0.0714285714285714	4.92862832495886
859	GE9	CYP4F11	1	1400	0.0714285714285714	4.92775114488133
860	GE9	LOXL4	1	1400	0.0714285714285714	4.8926690575221
861	GE9	CD93	1	1400	0.0714285714285714	4.84727359079752
862	GE9	C9orf24	1	1400	0.0714285714285714	4.82081381735241
863	GE9	IGHA2	2	1400	0.142857142857143	4.8078900118075
864	GE9	CCL3L3	4	1400	0.285714285714286	4.8046311466292
865	GE9	CD1C	1	1400	0.0714285714285714	4.75483920406157
866	GE9	CASC15	1	1400	0.0714285714285714	4.75346867249869
867	GE9	IL1B	4	1400	0.285714285714286	4.75152188839153
868	GE9	PIP	1	1400	0.0714285714285714	4.7481590625222
869	GE9	BPIFA2	1	1400	0.0714285714285714	4.73665807623159
870	GE9	FTH1P7	1	1400	0.0714285714285714	4.71842959862642
871	GE9	CLEC5A	1	1400	0.0714285714285714	4.7174848604757
872	GE9	PAX7	2	1400	0.142857142857143	4.68523096598472
873	GE9	NOS3	1	1400	0.0714285714285714	4.68115465467084
874	GE9	STAB1	1	1400	0.0714285714285714	4.66450305195413
875	GE9	AC007318.1	1	1400	0.0714285714285714	4.64019949700868
876	GE9	SYT13	1	1400	0.0714285714285714	4.62131896945151
877	GE9	CCND2	4	1400	0.285714285714286	4.61106586675774
878	GE9	MAP1LC3B2	1	1400	0.0714285714285714	4.58523429282258
879	GE9	SLC16A14	1	1400	0.0714285714285714	4.53543685854036
880	GE9	NLRP3	1	1400	0.0714285714285714	4.53347417180757
881	GE9	UPK1B	1	1400	0.0714285714285714	4.52163040092224
882	GE9	STAMBPL1	1	1400	0.0714285714285714	4.5185959096741
883	GE9	MCEMP1	3	1400	0.214285714285714	4.47236109354897
884	GE9	CCL18	4	1400	0.285714285714286	4.46479838444044
885	GE9	F13A1	2	1400	0.142857142857143	4.45798241336229
886	GE9	FOSL1	1	1400	0.0714285714285714	4.45682065660581
887	GE9	NPW	1	1400	0.0714285714285714	4.44513260512501
888	GE9	FGG	1	1400	0.0714285714285714	4.43197748688461
889	GE9	CCL4L2	4	1400	0.285714285714286	4.42515540908185
890	GE9	LPL	2	1400	0.142857142857143	4.40662328240388
891	GE9	GRASP	1	1400	0.0714285714285714	4.40060478723266
892	GE9	RETN	1	1400	0.0714285714285714	4.40006513726152
893	GE9	YWHAZP3	1	1400	0.0714285714285714	4.36226556445037
894	GE9	VNN1	1	1400	0.0714285714285714	4.34263402538818
895	GE9	THSD7A	1	1400	0.0714285714285714	4.33021720194195
896	GE9	FCGR2B	2	1400	0.142857142857143	4.32798736656166
897	GE9	SLC1A1	2	1400	0.142857142857143	4.32723991774428
898	GE9	MRC1	5	1400	0.357142857142857	4.27930126282234
899	GE9	PLEK	4	1400	0.285714285714286	4.27643012557902
900	GE9	CCL17	1	1400	0.0714285714285714	4.2577
901	GE10	RALYL	2	400	0.5	12.7398025774043
902	GE10	PTH2	1	400	0.25	12.0285076200824
903	GE10	LINC02009	2	400	0.5	9.81480423767052
904	GE10	ASCL1	2	400	0.5	9.08006599884834
905	GE10	MAGEA3	2	400	0.5	9.04173108507776
906	GE10	AL445228.2	2	400	0.5	8.02931706410424
907	GE10	LINC02076	2	400	0.5	7.98325822543804
908	GE10	AL359504.2	1	400	0.25	7.90939310035774
909	GE10	AC016575.1	1	400	0.25	7.90422220711828
910	GE10	GDNF	2	400	0.5	7.56293701896901
911	GE10	KLK1	2	400	0.5	7.52029299913143
912	GE10	CEL	2	400	0.5	7.38252188930323
913	GE10	SLC47A2	1	400	0.25	7.13088073493377
914	GE10	AC145285.6	1	400	0.25	7.07900100342449
915	GE10	AC005332.1	2	400	0.5	6.70713359490157
916	GE10	AL138885.3	2	400	0.5	6.55250316637938
917	GE10	CSAG1	2	400	0.5	6.45554386071779
918	GE10	AC233280.1	2	400	0.5	6.20381341693805
919	GE10	CRABP1	2	400	0.5	6.19951017769024
920	GE10	RAB3B	2	400	0.5	6.17326055629249
921	GE10	IGFBPL1	1	400	0.25	6.14110605286702
922	GE10	KRBOX1	1	400	0.25	6.13797495114059
923	GE10	KIF19	1	400	0.25	6.11885483709258
924	GE10	AC010331.1	2	400	0.5	6.08901633231465
925	GE10	AC017083.1	2	400	0.5	6.08888631674512
926	GE10	AC110769.2	1	400	0.25	6.00251247728621
927	GE10	HSPA14.1	2	400	0.5	5.91622991494537
928	GE10	AP001437.1	2	400	0.5	5.91235501294679
929	GE10	AC132192.2	2	400	0.5	5.82458722209106
930	GE10	NFYC-AS1	2	400	0.5	5.7811439815091
931	GE10	AC022613.1	2	400	0.5	5.73166138282706
932	GE10	AL356512.1	2	400	0.5	5.72340328272719
933	GE10	AC092171.3	2	400	0.5	5.65642225937225
934	GE10	NEB	2	400	0.5	5.6260427805666
935	GE10	ANK2	1	400	0.25	5.55292130630674
936	GE10	SSC5D	2	400	0.5	5.52605390548792
937	GE10	TCERG1L-AS1	1	400	0.25	5.49363013596466
938	GE10	PPARGC1A	2	400	0.5	5.48880191399186
939	GE10	AC069544.1	2	400	0.5	5.48307904366175
940	GE10	JAM3	1	400	0.25	5.43740899187815
941	GE10	LENG8-AS1	2	400	0.5	5.39435120318948
942	GE10	AC099778.1	2	400	0.5	5.35797627484306
943	GE10	AC010491.1	1	400	0.25	5.34695283932536
944	GE10	AC093635.1	1	400	0.25	5.18739741839191
945	GE10	AC024257.3	2	400	0.5	5.16999776433885
946	GE10	FAM171B	2	400	0.5	5.09530846162454
947	GE10	AL031963.3	2	400	0.5	4.95591929055385
948	GE10	CAPN10-DT	2	400	0.5	4.92221409339319
949	GE10	EPHA7	2	400	0.5	4.86040186458776
950	GE10	AJM1	2	400	0.5	4.85725875751218
951	GE10	TEN1	2	400	0.5	4.84117367400736
952	GE10	ZNF436-AS1	2	400	0.5	4.82739007786303
953	GE10	AC026412.3	1	400	0.25	4.76363660028553
954	GE10	FAM50B	2	400	0.5	4.74925333835268
955	GE10	CACNA2D1	2	400	0.5	4.67338703232477
956	GE10	AL031058.1	2	400	0.5	4.62349145025801
957	GE10	FGL1	2	400	0.5	4.59294268861741
958	GE10	TCTE3	2	400	0.5	4.55770641092582
959	GE10	C2CD4B	2	400	0.5	4.50591463648183
960	GE10	AC092803.2	2	400	0.5	4.46225585953907
961	GE10	ZNF667	1	400	0.25	4.42172294981736
962	GE10	ACSS3	1	400	0.25	4.42083045146697
963	GE10	CALML3	2	400	0.5	4.39524048222526
964	GE10	STAM-AS1	2	400	0.5	4.38632177448535
965	GE10	AL627171.1	1	400	0.25	4.37545060513975
966	GE10	NRL	1	400	0.25	4.36382470251826
967	GE10	RETREG1	2	400	0.5	4.33274293262022
968	GE10	AC008741.2	2	400	0.5	4.29915967692588
969	GE10	CNTNAP2	2	400	0.5	4.25922705429213
970	GE10	KSR2	2	400	0.5	4.2227902429151
971	GE10	LINC01089	2	400	0.5	4.18496075031795
972	GE10	ALDH1A2	2	400	0.5	4.1709917222341
973	GE10	SCGB2A1	2	400	0.5	4.11366935896983
974	GE10	AL391422.3	2	400	0.5	4.09114701353629
975	GE10	ZNF667-AS1	2	400	0.5	4.07146962449505
976	GE10	AC012640.2	1	400	0.25	4.07015340603499
977	GE10	AC087239.1	2	400	0.5	4.06265489663503
978	GE10	HES6	2	400	0.5	4.05532106657393
979	GE10	BTBD19	1	400	0.25	4.01867365666813
980	GE10	AC006333.2	2	400	0.5	4.01801826777128
981	GE10	CCDC28B	2	400	0.5	4.01578644977769
982	GE10	AC091271.1	2	400	0.5	3.95937151002653
983	GE10	ZIC2	2	400	0.5	3.92386625400033
984	GE10	CRYAB	2	400	0.5	3.90726555141167
985	GE10	EID2B	1	400	0.25	3.83828398293521
986	GE10	MAPT	2	400	0.5	3.82269200089661
987	GE10	POLR2J3.1	2	400	0.5	3.80726399558397
988	GE10	ZEB1-AS1	1	400	0.25	3.77846351798045
989	GE10	AC025181.2	2	400	0.5	3.76947889388495
990	GE10	OXCT1	2	400	0.5	3.74498693255934
991	GE10	AC139530.1	2	400	0.5	3.74052027319412
992	GE10	AP004609.3	2	400	0.5	3.71651975261704
993	GE10	TMEM47	2	400	0.5	3.71624382299824
994	GE10	LIFR-AS1	1	400	0.25	3.70837341651188
995	GE10	NRCAM	1	400	0.25	3.69722686365862
996	GE10	AC078846.1	2	400	0.5	3.65401076044528
997	GE10	NR0B2	1	400	0.25	3.56925015587548
998	GE10	SCG5	2	400	0.5	3.5649885917111
999	GE10	KIF1A	2	400	0.5	3.52127897466541
1000	GE10	CLGN	2	400	0.5	3.52099204206853
1001	GE11	ZMYND10	1	1068	0.0936329588014981	6.26807111940351
1002	GE11	CFAP126	2	1068	0.187265917602996	5.94425941077502
1003	GE11	SPEF1	1	1068	0.0936329588014981	5.93109401289916
1004	GE11	FAM183A	2	1068	0.187265917602996	5.65485948878934
1005	GE11	C5orf49	2	1068	0.187265917602996	5.51791826178249
1006	GE11	CFAP53	1	1068	0.0936329588014981	5.39026831185391
1007	GE11	ARMC3	2	1068	0.187265917602996	5.02861887885364
1008	GE11	C9orf24	2	1068	0.187265917602996	4.82081381735241
1009	GE11	RSPH1	2	1068	0.187265917602996	4.73624652593229
1010	GE11	C7orf57	2	1068	0.187265917602996	4.58816322302871
1011	GE11	SPAG6	2	1068	0.187265917602996	4.55166356143566
1012	GE11	CFAP70	1	1068	0.0936329588014981	4.48829169313864
1013	GE11	LRRIQ1	2	1068	0.187265917602996	4.46931928950072
1014	GE11	AC007906.2	2	1068	0.187265917602996	4.45194113128809
1015	GE11	MAPK15	2	1068	0.187265917602996	4.44613780746385
1016	GE11	BBOF1	2	1068	0.187265917602996	4.36095718803366
1017	GE11	TNXB	5	1068	0.468164794007491	4.3089066171342
1018	GE11	FOXJ1	2	1068	0.187265917602996	4.04669602575274
1019	GE11	PPIL6	2	1068	0.187265917602996	4.02438242468557
1020	GE11	KCNN3	2	1068	0.187265917602996	3.96995431707827
1021	GE11	CFAP45	2	1068	0.187265917602996	3.93488124686083
1022	GE11	CAPS	2	1068	0.187265917602996	3.91367681443479
1023	GE11	FAM229B	1	1068	0.0936329588014981	3.89648145879171
1024	GE11	AL683813.1	3	1068	0.280898876404494	3.84788057892999
1025	GE11	FAM227A	2	1068	0.187265917602996	3.7399778870983
1026	GE11	EFHC1	2	1068	0.187265917602996	3.62341591092117
1027	GE11	MMP24	3	1068	0.280898876404494	3.60941348159087
1028	GE11	AC108215.1	5	1068	0.468164794007491	3.60738305689202
1029	GE11	IQCN	2	1068	0.187265917602996	3.59883
1030	GE11	FABP3	2	1068	0.187265917602996	3.55560270160618
1031	GE11	HIF3A	1	1068	0.0936329588014981	3.55009442449599
1032	GE11	AC104695.4	1	1068	0.0936329588014981	3.53142226367758
1033	GE11	METTL27	2	1068	0.187265917602996	3.53016779641798
1034	GE11	ALKAL1	5	1068	0.468164794007491	3.52664046461754
1035	GE11	AL034417.3	5	1068	0.468164794007491	3.45425525119488
1036	GE11	PIFO	2	1068	0.187265917602996	3.44438043197496
1037	GE11	RRN3P3	2	1068	0.187265917602996	3.42191785407041
1038	GE11	AP000347.1	1	1068	0.0936329588014981	3.36423628974202
1039	GE11	AC115618.3	4	1068	0.374531835205993	3.35168789450421
1040	GE11	GEM	5	1068	0.468164794007491	3.31812857847363
1041	GE11	ACTA2	2	1068	0.187265917602996	3.31201255984518
1042	GE11	DNALI1	2	1068	0.187265917602996	3.30870023575662
1043	GE11	RP1	5	1068	0.468164794007491	3.30297843147894
1044	GE11	SCGB3A1	1	1068	0.0936329588014981	3.25732062451598
1045	GE11	PGC	1	1068	0.0936329588014981	3.24365985801031
1046	GE11	AL928596.1	3	1068	0.280898876404494	3.18661469136716
1047	GE11	PDLIM3	6	1068	0.561797752808989	3.16947071125549
1048	GE11	ADRB1	2	1068	0.187265917602996	3.07983983410926
1049	GE11	UBE2Q2P2	2	1068	0.187265917602996	3.03595714520181
1050	GE11	TPPP3	3	1068	0.280898876404494	3.02833156301342
1051	GE11	SNHG25	6	1068	0.561797752808989	3.01569112385272
1052	GE11	C12orf75	2	1068	0.187265917602996	3.00859902177381
1053	GE11	PXDN	1	1068	0.0936329588014981	2.99185667213497
1054	GE11	AHSA2P	2	1068	0.187265917602996	2.98796290399632
1055	GE11	AC005736.1	4	1068	0.374531835205993	2.93863147635085
1056	GE11	AC008105.2	3	1068	0.280898876404494	2.91200586374332
1057	GE11	RCAN1	2	1068	0.187265917602996	2.85947940863641
1058	GE11	SYCE1L	3	1068	0.280898876404494	2.84803214125351
1059	GE11	PAQR8	2	1068	0.187265917602996	2.84386664157173
1060	GE11	SMCR5	3	1068	0.280898876404494	2.83686985862344
1061	GE11	CTGF	3	1068	0.280898876404494	2.81889832059373
1062	GE11	ALOX15B	5	1068	0.468164794007491	2.81864440269508
1063	GE11	HSPG2	5	1068	0.468164794007491	2.81182458631213
1064	GE11	NMT2	2	1068	0.187265917602996	2.79959088670637
1065	GE11	COL9A2	5	1068	0.468164794007491	2.78608548270829
1066	GE11	MST1P2	2	1068	0.187265917602996	2.76781271843497
1067	GE11	TNS1	1	1068	0.0936329588014981	2.73758844704453
1068	GE11	PLEKHO1	2	1068	0.187265917602996	2.72924860870447
1069	GE11	ARC	3	1068	0.280898876404494	2.64836547123345
1070	GE11	AC122718.1	5	1068	0.468164794007491	2.63635711333672
1071	GE11	CBR3-AS1	5	1068	0.468164794007491	2.61712109865553
1072	GE11	SPAG1	2	1068	0.187265917602996	2.61216762283567
1073	GE11	GPC3	5	1068	0.468164794007491	2.61181765982907
1074	GE11	CTXN1	1	1068	0.0936329588014981	2.60344996433211
1075	GE11	RPGR	5	1068	0.468164794007491	2.59870728599819
1076	GE11	LIPE-AS1	1	1068	0.0936329588014981	2.59227055677783
1077	GE11	IYD	2	1068	0.187265917602996	2.57376295918512
1078	GE11	KLK10	1	1068	0.0936329588014981	2.55706746759307
1079	GE11	SNHG9	5	1068	0.468164794007491	2.55343844459087
1080	GE11	RF00100-4	5	1068	0.468164794007491	2.54849633468442
1081	GE11	DTNA	2	1068	0.187265917602996	2.54514675247738
1082	GE11	TENT4B	3	1068	0.280898876404494	2.52436181785267
1083	GE11	SBK1	1	1068	0.0936329588014981	2.50334398694392
1084	GE11	AC010503.4	2	1068	0.187265917602996	2.4876342958152
1085	GE11	AL121944.1	1	1068	0.0936329588014981	2.48641482610305
1086	GE11	EIF5AL1	2	1068	0.187265917602996	2.47953206706493
1087	GE11	LINC-PINT	3	1068	0.280898876404494	2.47855312760023
1088	GE11	USP27X	5	1068	0.468164794007491	2.46572499633699
1089	GE11	KLK11	3	1068	0.280898876404494	2.42899899707773
1090	GE11	TMSB4XP4	2	1068	0.187265917602996	2.41697876089272
1091	GE11	FBXL19	2	1068	0.187265917602996	2.39925645209891
1092	GE11	SLC12A7	1	1068	0.0936329588014981	2.39318059131686
1093	GE11	RPL10P3	3	1068	0.280898876404494	2.37935616370131
1094	GE11	ID4	2	1068	0.187265917602996	2.3599808235701
1095	GE11	TUT4	2	1068	0.187265917602996	2.35042976705785
1096	GE11	PRKX	1	1068	0.0936329588014981	2.34369586360595
1097	GE11	KMT2E-AS1	1	1068	0.0936329588014981	2.33132599885331
1098	GE11	PER1	4	1068	0.374531835205993	2.32810102093133
1099	GE11	ICAM4	3	1068	0.280898876404494	2.32685333232434
1100	GE11	BMP2	2	1068	0.187265917602996	2.32666770499951
1101	GE12	TMEM190	2	622	0.321543408360129	11.2797552727189
1102	GE12	AL357093.2	2	622	0.321543408360129	11.2173987053045
1103	GE12	CATSPERD	2	622	0.321543408360129	10.9951542018709
1104	GE12	TUBA4B	2	622	0.321543408360129	10.5935611857448
1105	GE12	ADGB	2	622	0.321543408360129	10.4556092958334
1106	GE12	CACNG6	2	622	0.321543408360129	10.344330111967
1107	GE12	APOBEC4	2	622	0.321543408360129	10.1853977905013
1108	GE12	C20orf85	2	622	0.321543408360129	10.1231846357148
1109	GE12	DNAH9	2	622	0.321543408360129	9.99772142666991
1110	GE12	C1orf87	2	622	0.321543408360129	9.83150072736106
1111	GE12	FAM92B	2	622	0.321543408360129	9.52517014098969
1112	GE12	SRGAP3-AS2	2	622	0.321543408360129	9.38146255241242
1113	GE12	OMG	2	622	0.321543408360129	9.37400751013813
1114	GE12	CAPSL	2	622	0.321543408360129	9.37110621507073
1115	GE12	FAM216B	2	622	0.321543408360129	9.35677796605442
1116	GE12	LINC01513	2	622	0.321543408360129	9.33261102148811
1117	GE12	CFAP77	2	622	0.321543408360129	9.20967178148001
1118	GE12	ERICH3	2	622	0.321543408360129	9.20392697453089
1119	GE12	FAM166B	2	622	0.321543408360129	9.17502967669003
1120	GE12	CCDC78	2	622	0.321543408360129	9.11384642275739
1121	GE12	LRRC71	2	622	0.321543408360129	9.06251566537776
1122	GE12	TSPAN19	1	622	0.160771704180064	9.04332842409927
1123	GE12	TEKT1	2	622	0.321543408360129	8.99932520079965
1124	GE12	CDHR4	2	622	0.321543408360129	8.96415989388595
1125	GE12	WDR38	2	622	0.321543408360129	8.9462953528236
1126	GE12	CFAP47	2	622	0.321543408360129	8.86536402670469
1127	GE12	DTHD1	2	622	0.321543408360129	8.84239112784143
1128	GE12	MAP3K19	2	622	0.321543408360129	8.79927336592318
1129	GE12	C1orf158	2	622	0.321543408360129	8.78106556866975
1130	GE12	CCL15	2	622	0.321543408360129	8.59893066619538
1131	GE12	CDHR3	2	622	0.321543408360129	8.45583270571293
1132	GE12	NEK10	2	622	0.321543408360129	8.44213472071318
1133	GE12	DNAH12	2	622	0.321543408360129	8.23472312600168
1134	GE12	MORN5	2	622	0.321543408360129	8.23347469899715
1135	GE12	CFAP206	2	622	0.321543408360129	8.19063116911505
1136	GE12	C6orf118	2	622	0.321543408360129	8.18327282955522
1137	GE12	CFAP73	2	622	0.321543408360129	8.11463879378796
1138	GE12	DNAAF1	2	622	0.321543408360129	8.10168554524106
1139	GE12	RGS22	2	622	0.321543408360129	8.08609343778114
1140	GE12	RSPH9	2	622	0.321543408360129	8.08558701053899
1141	GE12	DNAI1	2	622	0.321543408360129	8.0242501257347
1142	GE12	VWA3B	2	622	0.321543408360129	7.86233342483678
1143	GE12	LRRC10B	2	622	0.321543408360129	7.74832928869836
1144	GE12	ROPN1L	2	622	0.321543408360129	7.7391488545968
1145	GE12	VWA3A	2	622	0.321543408360129	7.73862688285739
1146	GE12	ZBBX	2	622	0.321543408360129	7.73322693330514
1147	GE12	DRC7	2	622	0.321543408360129	7.7079748294966
1148	GE12	RSPH4A	2	622	0.321543408360129	7.69000030784335
1149	GE12	EFCAB1	2	622	0.321543408360129	7.66617497960952
1150	GE12	TSNAXIP1	2	622	0.321543408360129	7.6636861339794
1151	GE12	CFAP52	2	622	0.321543408360129	7.63065492911598
1152	GE12	C11orf16	2	622	0.321543408360129	7.52573490968618
1153	GE12	LINC02345	2	622	0.321543408360129	7.49259864824804
1154	GE12	SNTN	2	622	0.321543408360129	7.47257667447279
1155	GE12	C9orf135	2	622	0.321543408360129	7.41481552408993
1156	GE12	AC091544.4	2	622	0.321543408360129	7.39870015900452
1157	GE12	GRIN3B	2	622	0.321543408360129	7.36125259830809
1158	GE12	LDLRAD1	2	622	0.321543408360129	7.34867183726629
1159	GE12	COX6B2	2	622	0.321543408360129	7.33202077016169
1160	GE12	LRRC46	2	622	0.321543408360129	7.30347572384242
1161	GE12	WDR63	2	622	0.321543408360129	7.28837158824357
1162	GE12	TTLL9	2	622	0.321543408360129	7.27497557569941
1163	GE12	AL121899.1	2	622	0.321543408360129	7.26419149374663
1164	GE12	CFAP157	2	622	0.321543408360129	7.23567545380094
1165	GE12	RIIAD1	2	622	0.321543408360129	7.19436646098244
1166	GE12	TTLL10	2	622	0.321543408360129	7.1867800002481
1167	GE12	TOGARAM2	2	622	0.321543408360129	7.16550261004652
1168	GE12	PACRG	2	622	0.321543408360129	7.06536897268315
1169	GE12	DYDC2	2	622	0.321543408360129	7.0467291649283
1170	GE12	C1orf194	2	622	0.321543408360129	7.01294323054383
1171	GE12	DRC1	2	622	0.321543408360129	6.9504373459652
1172	GE12	AC234582.1	2	622	0.321543408360129	6.94721709273911
1173	GE12	SAXO2	2	622	0.321543408360129	6.94118862762117
1174	GE12	STMND1	2	622	0.321543408360129	6.93992452502938
1175	GE12	HYDIN	2	622	0.321543408360129	6.92107448622333
1176	GE12	PRR29	2	622	0.321543408360129	6.90213060494446
1177	GE12	AC004832.1	2	622	0.321543408360129	6.88966531424121
1178	GE12	ALOX15	1	622	0.160771704180064	6.79096686827201
1179	GE12	PLPPR3	1	622	0.160771704180064	6.77409071013982
1180	GE12	CCDC170	2	622	0.321543408360129	6.76699964832756
1181	GE12	KCNE1	2	622	0.321543408360129	6.71960673190552
1182	GE12	CFAP74	2	622	0.321543408360129	6.70281448199201
1183	GE12	TEKT2	2	622	0.321543408360129	6.67368365074288
1184	GE12	ARMC4	2	622	0.321543408360129	6.6624686532463
1185	GE12	AC013264.1	2	622	0.321543408360129	6.62297068633976
1186	GE12	CCDC17	2	622	0.321543408360129	6.50300506611788
1187	GE12	CCDC33	1	622	0.160771704180064	6.48485041301998
1188	GE12	MAATS1	2	622	0.321543408360129	6.47767631844076
1189	GE12	ENKUR	2	622	0.321543408360129	6.42346357718642
1190	GE12	WDR93	2	622	0.321543408360129	6.41102662517745
1191	GE12	CRISP2	1	622	0.160771704180064	6.37020404616232
1192	GE12	NEK5	2	622	0.321543408360129	6.35851341081548
1193	GE12	FHAD1	2	622	0.321543408360129	6.33134336815422
1194	GE12	AC108134.4	2	622	0.321543408360129	6.31858680064993
1195	GE12	ZMYND10	2	622	0.321543408360129	6.26807111940351
1196	GE12	SPATA18	2	622	0.321543408360129	6.22533261157199
1197	GE12	CCNA1	1	622	0.160771704180064	6.21741975824341
1198	GE12	WDR86-AS1	2	622	0.321543408360129	6.19439945611216
1199	GE12	TMEM232	2	622	0.321543408360129	6.13341354999832
1200	GE12	KIF19	2	622	0.321543408360129	6.11885483709258
1201	GE13	RP11-157E21.1	2	400	0.5	10.9291318821206
1202	GE13	TEX11	2	400	0.5	9.82606
1203	GE13	SPINK4	2	400	0.5	8.52206850331985
1204	GE13	BMX	2	400	0.5	7.75088087534074
1205	GE13	SFTPC	2	400	0.5	7.70848765046409
1206	GE13	RP11-334A14.8	1	400	0.25	7.43706016865417
1207	GE13	RP11-259K15.2	2	400	0.5	7.22461749945736
1208	GE13	RP11-469H8.6	2	400	0.5	7.12202413278876
1209	GE13	GPR85	2	400	0.5	6.51384953071379
1210	GE13	MMP1	2	400	0.5	6.31415635131817
1211	GE13	RP11-793H13.3	1	400	0.25	6.10022902133345
1212	GE13	RP11-462G2.1	2	400	0.5	5.89780662900225
1213	GE13	PVRL3	2	400	0.5	5.87994355557455
1214	GE13	TFAP2D	2	400	0.5	5.76234909059239
1215	GE13	U47924.27	2	400	0.5	5.62729983968594
1216	GE13	IGFL2	2	400	0.5	5.42840169860187
1217	GE13	TEPP	2	400	0.5	5.33961800081227
1218	GE13	GMDS	2	400	0.5	5.28632962698716
1219	GE13	SDK2	2	400	0.5	5.1796
1220	GE13	MICALCL	2	400	0.5	5.15117705226633
1221	GE13	SRPX	2	400	0.5	5.12786466642846
1222	GE13	CLDN2	2	400	0.5	4.89520282665655
1223	GE13	GATA6-AS1	2	400	0.5	4.75738647039748
1224	GE13	AC009133.12	2	400	0.5	4.74949010944496
1225	GE13	RP11-452F19.3	2	400	0.5	4.67661473517722
1226	GE13	NRIP3	2	400	0.5	4.5940177348028
1227	GE13	SLC5A8	2	400	0.5	4.58733728103718
1228	GE13	ANGPTL2	1	400	0.25	4.55564623014182
1229	GE13	CTD-2561B21.11	2	400	0.5	4.5336092625926
1230	GE13	DNAH10	2	400	0.5	4.31401614662844
1231	GE13	CD96	2	400	0.5	4.22645170866376
1232	GE13	AC091729.9	2	400	0.5	4.21453281970322
1233	GE13	RP11-983P16.4	2	400	0.5	4.17720220795553
1234	GE13	AQP5	2	400	0.5	4.14573213166068
1235	GE13	AC008268.1	2	400	0.5	4.14569724438342
1236	GE13	NTS	2	400	0.5	4.09505035400095
1237	GE13	RP11-108M9.4	2	400	0.5	4.04453563722049
1238	GE13	SLC6A20	2	400	0.5	3.95409089776802
1239	GE13	BMP1	2	400	0.5	3.94230320758508
1240	GE13	AC007405.6	1	400	0.25	3.92335398144323
1241	GE13	GLDN	1	400	0.25	3.90032232232494
1242	GE13	RP4-568C11.4	2	400	0.5	3.88773418779926
1243	GE13	LRRC36	2	400	0.5	3.88483837018165
1244	GE13	CA2	2	400	0.5	3.80556004352391
1245	GE13	CYP3A5	2	400	0.5	3.74957769865139
1246	GE13	LGALS4	2	400	0.5	3.63584147074733
1247	GE13	SERPIND1	2	400	0.5	3.61680163144499
1248	GE13	IGHG4	2	400	0.5	3.5691451975155
1249	GE13	HNRNPU-AS1	2	400	0.5	3.54385481707373
1250	GE13	PRF1	2	400	0.5	3.53089944007353
1251	GE13	RP11-140K17.3	2	400	0.5	3.46178685031814
1252	GE13	ESAM	2	400	0.5	3.44598359170541
1253	GE13	INADL	2	400	0.5	3.41710413951589
1254	GE13	AKR1B1	2	400	0.5	3.4140686274545
1255	GE13	CES3	2	400	0.5	3.41031145119338
1256	GE13	VCAN	2	400	0.5	3.38081096844904
1257	GE13	CH17-340M24.3	2	400	0.5	3.35474004495387
1258	GE13	PGC	2	400	0.5	3.24365985801031
1259	GE13	RASGRF1	2	400	0.5	3.23439364953296
1260	GE13	KIAA1324L	1	400	0.25	3.17863237310362
1261	GE13	C4BPA	2	400	0.5	3.15382771889411
1262	GE13	VSIG1	2	400	0.5	3.13975826677593
1263	GE13	BMP4	2	400	0.5	3.05801165687523
1264	GE13	TPPP3	2	400	0.5	3.02833156301342
1265	GE13	GATA6	2	400	0.5	2.98627806592452
1266	GE13	IGHG1	2	400	0.5	2.94194291990613
1267	GE13	ECM1	2	400	0.5	2.94134517248589
1268	GE13	LLNLR-245B6.1	2	400	0.5	2.94114683005766
1269	GE13	SEPP1	2	400	0.5	2.89925851419757
1270	GE13	CTD-2336O2.1	2	400	0.5	2.8786894989467
1271	GE13	RAB4B	2	400	0.5	2.86711910815841
1272	GE13	TM4SF18	2	400	0.5	2.86515923644806
1273	GE13	SHISA2	1	400	0.25	2.86500750999585
1274	GE13	IGHA1	2	400	0.5	2.83254504855848
1275	GE13	SEPN1	2	400	0.5	2.81370909063447
1276	GE13	EBLN3	2	400	0.5	2.80470511895543
1277	GE13	KCNJ15	2	400	0.5	2.79507970542006
1278	GE13	GS1-124K5.4	2	400	0.5	2.7878892381623
1279	GE13	TCEB3	2	400	0.5	2.7423927169248
1280	GE13	FAM195A	2	400	0.5	2.72654854688131
1281	GE13	ERICH2	2	400	0.5	2.71542874282863
1282	GE13	C7orf55	2	400	0.5	2.68485381343545
1283	GE13	TGFBR2	2	400	0.5	2.67892258459846
1284	GE13	MMP24-AS1	2	400	0.5	2.67377172325578
1285	GE13	PPP2R4	2	400	0.5	2.66996558367296
1286	GE13	CLN3	2	400	0.5	2.66570722111125
1287	GE13	APOH	2	400	0.5	2.66377566777154
1288	GE13	CH17-189H20.1	2	400	0.5	2.6623697179365
1289	GE13	LYRM5	2	400	0.5	2.65270815669897
1290	GE13	MUC3A	2	400	0.5	2.64814873198515
1291	GE13	PLCG2	2	400	0.5	2.64742413333541
1292	GE13	SLC1A7	2	400	0.5	2.63321677527832
1293	GE13	PVRL2	2	400	0.5	2.63172352941905
1294	GE13	TMEM125	2	400	0.5	2.62773205631083
1295	GE13	SFTPD	2	400	0.5	2.61893383064851
1296	GE13	LINC00116	2	400	0.5	2.6015864570957
1297	GE13	B3GNT8	2	400	0.5	2.59161629472626
1298	GE13	AQP1	2	400	0.5	2.57810596259476
1299	GE13	FO538757.2	1	400	0.25	2.56958344322664
1300	GE13	IGLC3	2	400	0.5	2.55411483257945

## Sheet: Sheet7
Table S7. Functional enrichment analysis for marker genes of GEs. Related to Figure 3.
ID	Description	GeneRatio	BgRatio	RichFactor	FoldEnrichment	zScore	pvalue	p.adjust	qvalue	geneID	Count	GE
GO:0009205	purine ribonucleoside triphosphate metabolic process	17/105	244/18888	0.069672131147541	12.5330210772834	13.5569536802579	2.65197095609089e-14	5.37554512799623e-12	4.93266597832905e-12	498/506/509/513/514/93974/516/517/518/521/9551/10632/515/10476/522/539/26137	17	GE1
GO:1902600	proton transmembrane transport	15/105	161/18888	0.093167701863354	16.7595385980479	15.0146769125711	1.35100074653202e-14	3.04275390357823e-12	2.79206820949951e-12	498/506/509/513/514/516/517/518/521/9551/10632/515/10476/522/539	15	GE1
GO:0046034	ATP metabolic process	17/105	220/18888	0.0772727272727273	13.9002597402597	14.389793426281	4.76162761154046e-15	1.20647739607406e-12	1.10707841968316e-12	498/506/509/513/514/93974/516/517/518/521/9551/10632/515/10476/522/539/26137	17	GE1
GO:0042776	proton motive force-driven mitochondrial ATP synthesis	12/105	67/18888	0.17910447761194	32.2183368869936	19.1390103527943	2.12329804274017e-15	6.14846447519191e-13	5.64190622785247e-13	498/506/509/513/514/521/9551/10632/515/10476/522/539	12	GE1
GO:0009142	nucleoside triphosphate biosynthetic process	15/105	126/18888	0.119047619047619	21.4149659863946	17.1904809677951	3.29382829788961e-16	1.11276499330371e-13	1.02108677234578e-13	498/506/509/513/514/516/517/518/521/9551/10632/515/10476/522/539	15	GE1
GO:0009201	ribonucleoside triphosphate biosynthetic process	15/105	118/18888	0.127118644067797	22.8668280871671	17.8151022119762	1.20038001046483e-16	4.86634056242441e-14	4.46541363892916e-14	498/506/509/513/514/516/517/518/521/9551/10632/515/10476/522/539	15	GE1
GO:0009206	purine ribonucleoside triphosphate biosynthetic process	15/105	112/18888	0.133928571428571	24.0918367346939	18.3257	5.35111772823887e-17	3.11271004154466e-14	2.85626081759895e-14	498/506/509/513/514/516/517/518/521/9551/10632/515/10476/522/539	15	GE1
GO:0009145	purine nucleoside triphosphate biosynthetic process	15/105	113/18888	0.132743362831858	23.8786346396966	18.237823660203	6.14249638193322e-17	3.11271004154466e-14	2.85626081759895e-14	498/506/509/513/514/516/517/518/521/9551/10632/515/10476/522/539	15	GE1
GO:0006754	ATP biosynthetic process	15/105	101/18888	0.148514851485149	26.7157001414427	19.3742091013289	1.06566200892283e-17	1.08004844604329e-14	9.91065668298229e-15	498/506/509/513/514/516/517/518/521/9551/10632/515/10476/522/539	15	GE1
GO:0015986	proton motive force-driven ATP synthesis	15/105	76/18888	0.197368421052632	35.5037593984962	22.5345758583598	1.13835744458873e-19	2.30745054018137e-16	2.11734484693505e-16	498/506/509/513/514/516/517/518/521/9551/10632/515/10476/522/539	15	GE1
GO:0007088	regulation of mitotic nuclear division	27/149	118/18888	0.228813559322034	29.0055738823797	27.211642874351	2.46753148727492e-32	4.47116705494216e-30	3.84934912014888e-30	6790/9212/332/699/701/891/991/157313/55143/1063/9787/26271/348654/9585/57082/4085/4288/10403/4751/83540/51203/5347/147841/57405/9319/7272/11065	27	GE2
GO:0044772	mitotic cell cycle phase transition	42/149	451/18888	0.0931263858093126	11.805175672257	20.7098233256247	2.43409774560348e-33	4.900650127815e-31	4.21910275904602e-31	54443/79915/6790/9212/332/672/699/701/890/891/9133/898/899/991/113130/55143/983/1031/1033/1062/1063/9787/26271/348654/51512/128239/9928/57082/4085/9833/10403/10763/83540/5347/6241/6502/147841/57405/10460/9319/7272/11065	42	GE2
GO:0051983	regulation of chromosome segregation	29/149	131/18888	0.221374045801527	28.0625032020083	27.715539860565	3.01943346639747e-34	6.83901680139027e-32	5.88789525947507e-32	9212/332/699/701/891/991/157313/55143/983/1062/1063/9787/26271/348654/11004/57082/4085/4288/64151/23397/10403/83540/5347/147841/57405/10460/9319/7272/11065	29	GE2
GO:0000819	sister chromatid segregation	44/149	229/18888	0.192139737991266	24.3566132293895	31.7091679846443	2.90911453468243e-49	7.53045076692081e-47	6.48316953443513e-47	9212/332/699/701/891/991/113130/55143/983/1062/1063/64105/9787/26271/348654/3832/9928/146909/9493/11004/24137/3833/57082/4085/4605/64151/23397/10403/4751/83540/51203/5347/9055/29127/221150/10615/147841/57405/10460/7153/22974/9319/7272/11065	44	GE2
GO:0048285	organelle fission	56/149	493/18888	0.113590263691684	14.3992812121377	26.8816847772975	4.89931577849124e-50	1.7833315559427e-47	1.53531855809636e-47	54443/259266/6790/9212/332/83990/699/701/891/9133/898/991/157313/113130/55143/983/1062/1063/64105/9787/26271/348654/3832/9928/146909/9585/9493/11004/24137/3833/57082/4085/4288/84057/4605/64151/23397/10403/4751/83540/51203/5347/9055/9232/29127/10635/221150/10615/147841/57405/10388/7153/22974/9319/7272/11065	56	GE2
GO:0140014	mitotic nuclear division	47/149	277/18888	0.169675090252708	21.5088798972694	30.6618525296835	4.93619600922907e-50	1.7833315559427e-47	1.53531855809636e-47	54443/6790/9212/332/699/701/891/991/157313/113130/55143/983/1062/1063/64105/9787/26271/348654/3832/9928/146909/9585/9493/11004/24137/3833/57082/4085/4288/4605/64151/23397/10403/4751/83540/51203/5347/9055/29127/221150/10615/147841/57405/22974/9319/7272/11065	47	GE2
GO:0000070	mitotic sister chromatid segregation	42/149	188/18888	0.223404255319149	28.3198629158932	33.5689730927778	5.90507137729371e-50	1.7833315559427e-47	1.53531855809636e-47	9212/332/699/701/891/991/113130/55143/983/1062/1063/64105/9787/26271/348654/3832/9928/146909/9493/11004/24137/3833/57082/4085/4605/64151/23397/10403/4751/83540/51203/5347/9055/29127/221150/10615/147841/57405/22974/9319/7272/11065	42	GE2
GO:0000280	nuclear division	56/149	446/18888	0.125560538116592	15.9166942546724	28.4274187828297	1.58303667001854e-52	9.561541486912e-50	8.23179068409642e-50	54443/259266/6790/9212/332/83990/699/701/891/9133/898/991/157313/113130/55143/983/1062/1063/64105/9787/26271/348654/3832/9928/146909/9585/9493/11004/24137/3833/57082/4085/4288/84057/4605/64151/23397/10403/4751/83540/51203/5347/9055/9232/29127/10635/221150/10615/147841/57405/10388/7153/22974/9319/7272/11065	56	GE2
GO:0098813	nuclear chromosome segregation	54/149	317/18888	0.170347003154574	21.5940550039168	32.9727578544979	5.33918395471524e-58	4.83730066297201e-55	4.16456348467789e-55	259266/6790/9212/332/83990/699/701/891/9133/898/991/113130/55143/983/1062/1063/64105/9787/1894/81610/26271/348654/3832/9928/146909/9493/11004/24137/3833/57082/4085/84057/4605/64151/23397/10403/4751/83540/51203/5347/9055/9232/29127/221150/10615/147841/57405/10388/10460/7153/22974/9319/7272/11065	54	GE2
GO:0007059	chromosome segregation	60/149	423/18888	0.141843971631206	17.9808653434242	31.496098830386	6.95574870455617e-60	1.26038166526558e-56	1.08509679791076e-56	259266/6790/9212/332/672/83990/699/701/891/9133/898/991/157313/113130/55143/983/1062/1063/64105/387103/9787/1894/81610/26271/348654/55355/3832/9928/146909/9493/11004/24137/3833/57082/4085/4288/84057/4605/64151/23397/10403/4751/83540/51203/5347/9055/9232/29127/151246/221150/10615/147841/57405/10388/10460/7153/22974/9319/7272/11065	60	GE2
GO:0051783	regulation of nuclear division	19/113	147/18888	0.129251700680272	21.6044789597255	19.4560495117732	2.34587978035117e-20	3.98564974681663e-18	3.51881967052675e-18	6790/9212/332/891/991/55143/1063/9787/3481/9585/4085/4288/4751/83540/51203/57405/8877/11065/11130	19	GE3
GO:1902850	microtubule cytoskeleton organization involved in mitosis	20/113	164/18888	0.121951219512195	20.3842	19.3419936197159	7.198239834444e-21	1.35886771985782e-18	1.199706639074e-18	6790/9212/332/891/991/55143/983/1058/1062/9787/24137/4085/4605/4751/83540/51203/9055/57405/10460/22974	20	GE3
GO:0007088	regulation of mitotic nuclear division	19/113	118/18888	0.161016949152542	26.9140542972851	21.9065996175086	3.01842228811101e-22	6.41037433437577e-20	5.65954179020815e-20	6790/9212/332/891/991/55143/1063/9787/3481/9585/4085/4288/4751/83540/51203/57405/8877/11065/11130	19	GE3
GO:0000070	mitotic sister chromatid segregation	22/113	188/18888	0.117021276595745	19.5601581623047	19.8413187098695	1.72870911062837e-22	4.19582396993944e-20	3.70437666563223e-20	9212/332/891/991/55143/983/1062/1063/9787/11004/24137/90417/4085/4605/4751/83540/51203/9055/57405/22974/11065/11130	22	GE3
GO:0000819	sister chromatid segregation	24/113	229/18888	0.104803493449782	17.5179503033582	19.5101430201373	2.53395099294809e-23	7.17530456169801e-21	6.33487748237023e-21	9212/332/891/991/55143/983/1062/1063/9787/11004/24137/90417/4085/4605/4751/83540/51203/9055/57405/10460/7153/22974/11065/11130	24	GE3
GO:0048285	organelle fission	33/113	493/18888	0.0669371196754564	11.1885691719471	17.7835107143242	1.01812169875591e-25	3.45957753237259e-23	3.05436509626774e-23	54443/259266/6790/9212/332/891/9133/991/55143/983/1062/1063/9787/3481/9585/11004/24137/90417/4085/4288/84057/4605/4751/83540/51203/9055/9232/57405/8877/7153/22974/11065/11130	33	GE3
GO:0098813	nuclear chromosome segregation	29/113	317/18888	0.0914826498422713	15.2913654001842	19.9074873548774	1.97363496953041e-26	8.3830145330804e-24	7.40113113573902e-24	259266/6790/9212/332/891/9133/991/55143/983/1062/1063/9787/11004/24137/90417/4085/84057/4605/4751/83540/51203/9055/9232/57405/10460/7153/22974/11065/11130	29	GE3
GO:0140014	mitotic nuclear division	28/113	277/18888	0.101083032490975	16.896073607872	20.6764337478579	9.81562077719801e-27	5.55891323348647e-24	4.90781038859901e-24	54443/6790/9212/332/891/991/55143/983/1062/1063/9787/3481/9585/11004/24137/90417/4085/4288/4605/4751/83540/51203/9055/57405/8877/22974/11065/11130	28	GE3
GO:0000280	nuclear division	33/113	446/18888	0.0739910313901345	12.3676336362554	18.8479546427309	4.04125850405654e-27	3.43304909919603e-24	3.03094387804241e-24	54443/259266/6790/9212/332/891/9133/991/55143/983/1062/1063/9787/3481/9585/11004/24137/90417/4085/4288/84057/4605/4751/83540/51203/9055/9232/57405/8877/7153/22974/11065/11130	33	GE3
GO:0007059	chromosome segregation	33/113	423/18888	0.0780141843971631	13.0401054415364	19.4292732892991	7.24919030223516e-28	1.23163743234975e-24	1.08737854533527e-24	259266/6790/9212/332/891/9133/991/55143/983/1062/1063/55839/79682/387103/9787/11004/24137/90417/4085/4288/84057/4605/4751/83540/51203/9055/9232/57405/10460/7153/22974/11065/11130	33	GE3
GO:0019751	polyol metabolic process	6/160	107/18888	0.0560747663551402	6.6196261682243	5.38810114666993	0.000300417489898808	0.0923597118045634	0.0847585353888677	1593/8821/3633/4036/5031/5336	6	GE4
GO:0010742	macrophage derived foam cell differentiation	4/160	40/18888	0.1	11.805	6.32292326828806	0.000357381425603964	0.0923597118045634	0.0847585353888677	183/247/1435/3685	4	GE4
GO:0014812	muscle cell migration	6/160	111/18888	0.0540540540540541	6.38108108108108	5.25549592112331	0.00036608753957523	0.0923597118045634	0.0847585353888677	1545/8829/5031/5327/6495/7060	6	GE4
GO:0021783	preganglionic parasympathetic fiber development	3/160	17/18888	0.176470588235294	20.8323529411765	7.56130971164185	0.000371757008641244	0.0923597118045634	0.0847585353888677	8829/8828/6495	3	GE4
GO:0090077	foam cell differentiation	4/160	41/18888	0.0975609756097561	11.5170731707317	6.23105363700098	0.000393422791592768	0.0923597118045634	0.0847585353888677	183/247/1435/3685	4	GE4
GO:0010743	regulation of macrophage derived foam cell differentiation	4/160	33/18888	0.121212121212121	14.3090909090909	7.07274294668161	0.000167560316929495	0.0841823032253782	0.0772541250685461	183/247/1435/3685	4	GE4
GO:0021561	facial nerve development	3/160	11/18888	0.272727272727273	32.1954545454545	9.56570435004779	9.36412471002748e-05	0.0588067031789726	0.0539669292498952	8829/8828/6495	3	GE4
GO:0021610	facial nerve morphogenesis	3/160	11/18888	0.272727272727273	32.1954545454545	9.56570435004779	9.36412471002748e-05	0.0588067031789726	0.0539669292498952	8829/8828/6495	3	GE4
GO:0003148	outflow tract septum morphogenesis	4/160	24/18888	0.166666666666667	19.675	8.46145635415335	4.61714643490694e-05	0.0579913592224312	0.05321868785498	2022/4036/8829/8828	4	GE4
GO:0061548	ganglion development	4/160	17/18888	0.235294117647059	27.7764705882353	10.2088333997905	1.08308358703264e-05	0.0272070597062598	0.0249679269010682	1545/8829/8828/6495	4	GE4
GO:0042776	proton motive force-driven mitochondrial ATP synthesis	11/151	67/18888	0.164179104477612	20.5365226845903	14.3808069199301	5.1641492309737e-12	1.33698334039055e-09	1.21408172443639e-09	498/509/513/514/521/9551/515/10476/522/539/4701	11	GE5
GO:0009206	purine ribonucleoside triphosphate biosynthetic process	13/151	112/18888	0.116071428571429	14.5189214758751	12.8815894591591	5.56380915684788e-12	1.33698334039055e-09	1.21408172443639e-09	498/509/513/514/516/518/521/9551/515/10476/522/539/4701	13	GE5
GO:0006754	ATP biosynthetic process	13/151	101/18888	0.128712871287129	16.1001901514655	13.6594848522422	1.44052660548636e-12	4.54179710293451e-10	4.12429436642059e-10	498/509/513/514/516/518/521/9551/515/10476/522/539/4701	13	GE5
GO:0009142	nucleoside triphosphate biosynthetic process	14/151	126/18888	0.111111111111111	13.8984547461369	13.0407727362849	1.5120423147514e-12	4.54179710293451e-10	4.12429436642059e-10	203/498/509/513/514/516/518/521/9551/515/10476/522/539/4701	14	GE5
GO:0009141	nucleoside triphosphate metabolic process	19/151	266/18888	0.0714285714285714	8.93472090823084	11.6998218329751	4.23945626887247e-13	1.69790223568342e-10	1.54182330620572e-10	203/498/509/513/514/93974/516/518/521/9551/515/10476/522/539/2203/120892/4701/26471/26137	19	GE5
GO:0009205	purine ribonucleoside triphosphate metabolic process	19/151	244/18888	0.0778688524590164	9.74031049831723	12.3359375639008	8.96809928168659e-14	8.60511987094106e-11	7.81409794443823e-11	203/498/509/513/514/93974/516/518/521/9551/515/10476/522/539/2203/120892/4701/26471/26137	19	GE5
GO:0009144	purine nucleoside triphosphate metabolic process	19/151	250/18888	0.076	9.50654304635762	12.1546760976479	1.39104437317876e-13	8.60511987094106e-11	7.81409794443823e-11	203/498/509/513/514/93974/516/518/521/9551/515/10476/522/539/2203/120892/4701/26471/26137	19	GE5
GO:0009199	ribonucleoside triphosphate metabolic process	19/151	251/18888	0.0756972111553785	9.46866837286615	12.1250606622944	1.4948893333728e-13	8.60511987094106e-11	7.81409794443823e-11	203/498/509/513/514/93974/516/518/521/9551/515/10476/522/539/2203/120892/4701/26471/26137	19	GE5
GO:0046034	ATP metabolic process	18/151	220/18888	0.0818181818181818	10.2343166767008	12.3676487833291	1.79049518746173e-13	8.60511987094106e-11	7.81409794443823e-11	203/498/509/513/514/93974/516/518/521/9551/515/10476/522/539/2203/4701/26471/26137	18	GE5
GO:0015986	proton motive force-driven ATP synthesis	13/151	76/18888	0.171052631578947	21.3963053328686	15.9941347735419	3.19685677929161e-14	7.68204684063773e-11	6.97587800365421e-11	498/509/513/514/516/518/521/9551/515/10476/522/539/4701	13	GE5
GO:0016114	terpenoid biosynthetic process	4/169	16/18888	0.25	27.9408284023669	10.2434321094776	1.03509417763457e-05	0.00249237510632455	0.00222671283271809	220/1543/10170/157506	4	GE6
GO:0016102	diterpenoid biosynthetic process	4/169	10/18888	0.4	44.705325443787	13.1352967256923	1.24556669537901e-06	0.000362321512055805	0.000323701660483293	220/1543/10170/157506	4	GE6
GO:0031424	keratinization	9/169	83/18888	0.108433734939759	12.1189135239182	9.64602204666717	5.53401261782398e-08	1.8110056291829e-05	1.61797053115854e-05	3868/3872/3852/3853/3854/6699/6703/6704/6707	9	GE6
GO:0043588	skin development	18/169	318/18888	0.0566037735849057	6.3262252986491	9.1014515499341	5.695608540014e-10	3.23705169451812e-07	2.89201434008253e-07	9076/1475/22943/10468/3664/3861/3868/3872/3852/3853/3854/5017/6278/6699/6703/6704/6707/8626	18	GE6
GO:0030216	keratinocyte differentiation	14/169	177/18888	0.0790960451977401	8.84003610470364	9.95725700579515	6.95544751326612e-10	3.23705169451812e-07	2.89201434008253e-07	1475/3664/3861/3868/3872/3852/3853/3854/6278/6699/6703/6704/6707/8626	14	GE6
GO:0009913	epidermal cell differentiation	16/169	246/18888	0.0650406504065041	7.26915860874585	9.40403159602832	7.28822343915836e-10	3.23705169451812e-07	2.89201434008253e-07	1475/3664/3861/3868/3872/3852/3853/3854/5017/5308/6278/6699/6703/6704/6707/8626	16	GE6
GO:0045104	intermediate filament cytoskeleton organization	11/169	94/18888	0.117021276595745	13.0786856351504	11.1546902270237	7.71216764206197e-10	3.23705169451812e-07	2.89201434008253e-07	3860/3861/3866/3868/3872/25984/3881/3852/3853/3854/5317	11	GE6
GO:0045103	intermediate filament-based process	11/169	95/18888	0.115789473684211	12.9410152600436	11.0863483185807	8.65521843454043e-10	3.23705169451812e-07	2.89201434008253e-07	3860/3861/3866/3868/3872/25984/3881/3852/3853/3854/5317	11	GE6
GO:0045109	intermediate filament organization	11/169	73/18888	0.150684931506849	16.8410472562211	12.8847717213907	4.67232902168897e-11	6.11607868939086e-08	5.46416583483837e-08	3860/3861/3866/3868/3872/25984/3881/3852/3853/3854/5317	11	GE6
GO:0008544	epidermis development	23/169	387/18888	0.0594315245478036	6.64226411632494	10.6560147512753	6.98767837172474e-13	1.82937419771754e-09	1.63438119389183e-09	9076/1475/22943/2171/10468/2709/3664/3861/3866/3868/3872/3881/3852/3853/3854/5017/5308/6278/6699/6703/6704/6707/8626	23	GE6
GO:0051983	regulation of chromosome segregation	17/126	131/18888	0.129770992366412	19.4532897128317	17.3682	1.67384462349573e-17	3.70756584104305e-15	3.19263837660449e-15	9212/332/891/991/55143/983/1063/9787/4085/4288/5347/10592/57405/10460/9319/11065/11130	17	GE7
GO:0007088	regulation of mitotic nuclear division	17/126	118/18888	0.144067796610169	21.5964487489911	18.391976772229	2.68240864463717e-18	6.60170571985704e-16	5.68482393459948e-16	9212/332/652/891/991/55143/1063/9787/9585/4085/4288/51203/5347/57405/9319/11065/11130	17	GE7
GO:0044772	mitotic cell cycle phase transition	27/126	451/18888	0.0598669623059867	8.97434273044029	14.0464066514751	1.96738561548231e-18	5.44719892286665e-16	4.6906614937552e-16	54443/9212/332/890/891/9133/991/55143/983/1033/1063/1163/1164/63967/10926/9787/29980/1978/2305/4085/5347/6241/57405/10460/9319/11065/11130	27	GE7
GO:0000070	mitotic sister chromatid segregation	21/126	188/18888	0.111702127659574	16.7446808510638	17.7794851231337	5.05472168425446e-20	1.59945836151766e-17	1.37731664539385e-17	9212/332/891/991/55143/983/1063/64105/9787/24137/4085/440145/51203/5347/9055/10592/10615/57405/9319/11065/11130	21	GE7
GO:0048285	organelle fission	30/126	493/18888	0.0608519269776876	9.12199362503622	14.9748818566137	1.17521217838767e-20	4.33849162521447e-18	3.73593766182184e-18	54443/9212/332/652/891/9133/991/55143/983/1063/64105/1164/9787/9585/24137/4085/4288/84057/440145/51203/5347/9055/9232/10592/10615/57405/7153/9319/11065/11130	30	GE7
GO:0000819	sister chromatid segregation	23/126	229/18888	0.100436681222707	15.0559367851944	17.5372119603531	8.49092087689557e-21	3.76147794846474e-18	3.23906286924943e-18	9212/332/891/991/55143/983/1063/64105/9787/24137/4085/440145/51203/5347/9055/10592/10615/57405/10460/7153/9319/11065/11130	23	GE7
GO:0098813	nuclear chromosome segregation	26/126	317/18888	0.082018927444795	12.2950277902959	16.619826541611	3.50750679223727e-21	1.94228188620139e-18	1.67252692303524e-18	9212/332/891/9133/991/55143/983/1063/64105/9787/24137/4085/84057/440145/51203/5347/9055/9232/10592/10615/57405/10460/7153/9319/11065/11130	26	GE7
GO:0140014	mitotic nuclear division	25/126	277/18888	0.0902527075812274	13.529310641224	17.2150942118299	2.09678526892777e-21	1.54812645689167e-18	1.33311400256039e-18	54443/9212/332/652/891/991/55143/983/1063/64105/9787/9585/24137/4085/4288/440145/51203/5347/9055/10592/10615/57405/9319/11065/11130	25	GE7
GO:0000280	nuclear division	30/126	446/18888	0.0672645739910314	10.0832799487508	15.9086496215006	6.69065689918805e-22	7.40990251585077e-19	6.3807738428046e-19	54443/9212/332/652/891/9133/991/55143/983/1063/64105/1164/9787/9585/24137/4085/4288/84057/440145/51203/5347/9055/9232/10592/10615/57405/7153/9319/11065/11130	30	GE7
GO:0007059	chromosome segregation	30/126	423/18888	0.0709219858156028	10.6315433975008	16.4179379668838	1.45132732678676e-22	3.21469002883268e-19	2.7682159117238e-19	9212/332/891/9133/991/55143/983/1063/64105/79019/79682/387103/9787/24137/4085/4288/84057/440145/51203/5347/9055/9232/10592/10615/57405/10460/7153/9319/11065/11130	30	GE7
GO:0170033	L-amino acid metabolic process	8/172	163/18888	0.049079754601227	5.38964188899986	5.39574200520587	0.000126000310148278	0.0327222805455079	0.0307042861045542	80150/2729/2730/2744/2875/5352/5471/23657	8	GE8
GO:0007584	response to nutrient	9/172	164/18888	0.0548780487804878	6.0263754963131	6.19750281449505	1.97541322937601e-05	0.0245158961088943	0.0230039922550677	8644/56477/1030/1591/2729/2730/6566/6696/6772	9	GE8
GO:0051900	regulation of mitochondrial depolarization	4/172	20/18888	0.2	21.9627906976744	8.99166995692862	2.87086195863506e-05	0.0245158961088943	0.0230039922550677	2729/2730/3791/10962	4	GE8
GO:0009064	glutamine family amino acid metabolic process	6/172	74/18888	0.0810810810810811	8.90383406662477	6.53058820278541	5.79932260859309e-05	0.0245158961088943	0.0230039922550677	80150/2729/2730/2744/5471/23657	6	GE8
GO:0170039	proteinogenic amino acid metabolic process	8/172	147/18888	0.054421768707483	5.97626957759848	5.80637901933897	6.11500368199868e-05	0.0245158961088943	0.0230039922550677	80150/2729/2730/2744/2875/5352/5471/23657	8	GE8
GO:0015986	proton motive force-driven ATP synthesis	6/172	76/18888	0.0789473684210526	8.66952264381885	6.42239245307138	6.74201236640213e-05	0.0245158961088943	0.0230039922550677	516/521/9551/515/4698/30968	6	GE8
GO:0051882	mitochondrial depolarization	4/172	25/18888	0.16	17.5702325581395	7.94753448388578	7.23388711150052e-05	0.0245158961088943	0.0230039922550677	2729/2730/3791/10962	4	GE8
GO:0030638	polyketide metabolic process	3/172	10/18888	0.3	32.9441860465116	9.68619105556905	8.49607489334035e-05	0.0245158961088943	0.0230039922550677	57016/1645/8644	3	GE8
GO:0030647	aminoglycoside antibiotic metabolic process	3/172	10/18888	0.3	32.9441860465116	9.68619105556905	8.49607489334035e-05	0.0245158961088943	0.0230039922550677	57016/1645/8644	3	GE8
GO:0044598	doxorubicin metabolic process	3/172	10/18888	0.3	32.9441860465116	9.68619105556905	8.49607489334035e-05	0.0245158961088943	0.0230039922550677	57016/1645/8644	3	GE8
GO:0002237	response to molecule of bacterial origin	16/162	369/18888	0.043360433604336	5.05550536986851	7.31755315628937	1.22301980927331e-07	3.45358188262582e-05	2.72199389199209e-05	9590/728/929/942/1373/2213/84868/3553/3394/4129/4360/114548/4842/4846/5724/7356	16	GE9
GO:0019731	antibacterial humoral response	8/162	69/18888	0.115942028985507	13.5179817498658	9.68895806433669	1.32068140826991e-07	3.45358188262582e-05	2.72199389199209e-05	2243/2244/3494/3501/3503/3507/3960/5319	8	GE9
GO:0034116	positive regulation of heterotypic cell-cell adhesion	5/162	14/18888	0.357142857142857	41.6402116402116	14.1483075359778	8.20578755730203e-08	2.6822668077931e-05	2.11407000489439e-05	177/2243/2244/2266/3553	5	GE9
GO:0001819	positive regulation of cytokine production	19/162	500/18888	0.038	4.43051851851852	7.23092755732867	6.09301874815692e-08	2.27617771806148e-05	1.79400461787838e-05	177/9590/728/929/920/9308/942/23601/1436/1536/2213/84868/3553/3394/4023/4321/114548/5319/5724	19	GE9
GO:0043410	positive regulation of MAPK cascade	19/162	475/18888	0.04	4.6637037037037	7.52179269201719	2.71066807150772e-08	1.24324639919558e-05	9.79883848092961e-06	177/9590/728/6357/6361/6362/414062/920/1436/22943/55816/2213/2243/2244/2266/1880/84868/3553/5319	19	GE9
GO:0070371	ERK1 and ERK2 cascade	16/162	332/18888	0.0481927710843374	5.61892012494422	7.89739389879409	2.85257300006633e-08	1.24324639919558e-05	9.79883848092961e-06	177/9590/728/6357/6361/6362/414062/920/1436/1846/2243/2244/2266/1880/84868/3553	16	GE9
GO:0070372	regulation of ERK1 and ERK2 cascade	16/162	308/18888	0.051948051948052	6.05675805675806	8.32225782932925	9.95068807674921e-09	6.50526233017479e-06	5.1272229616513e-06	177/9590/728/6357/6361/6362/414062/920/1436/1846/2243/2244/2266/1880/84868/3553	16	GE9
GO:0042742	defense response to bacterium	17/162	330/18888	0.0515151515151515	6.00628507295174	8.53342643092098	3.79915778103883e-09	5.6865700315426e-06	4.48195798400339e-06	140683/728/920/81035/2243/2244/84868/3240/3494/3501/3503/3507/3553/3394/3960/5319/23166	17	GE9
GO:0070374	positive regulation of ERK1 and ERK2 cascade	14/162	215/18888	0.0651162790697674	7.59207579672696	9.04171599639343	5.02865242365102e-09	5.6865700315426e-06	4.48195798400339e-06	177/9590/728/6357/6361/6362/414062/920/1436/2243/2244/2266/1880/84868	14	GE9
GO:0006959	humoral immune response	15/162	258/18888	0.0581395348837209	6.7786391042205	8.69251573641909	6.52378971113874e-09	5.6865700315426e-06	4.48195798400339e-06	716/6357/9308/2213/2243/2244/1880/3494/3501/3503/3507/3553/3960/5319/11326	15	GE9
GO:1902903	regulation of supramolecular fiber organization	9/124	392/18888	0.0229591836734694	3.49720210664911	4.06150917244572	0.00113456750548549	0.234061276381656	0.221300377648906	55704/23406/1410/2288/57704/54801/4137/5629/3925	9	GE10
GO:0007584	response to nutrient	6/124	164/18888	0.0365853658536585	5.57277734067663	4.78114905709898	0.000750867367770732	0.172115486634558	0.162731840056043	8854/429/56477/1030/3485/6772	6	GE10
GO:0051258	protein polymerization	8/124	287/18888	0.0278745644599303	4.24592559289648	4.50444182913632	0.000619839010327823	0.170149813461824	0.16087333435965	29082/23406/2288/57704/54801/4137/3925/27338	8	GE10
GO:0070507	regulation of microtubule cytoskeleton organization	6/124	160/18888	0.0375	5.71209677419355	4.86584323242255	0.000659815078863109	0.170149813461824	0.16087333435965	29082/2288/57704/54801/4137/3925	6	GE10
GO:0021516	dorsal spinal cord development	3/124	20/18888	0.15	22.8483870967742	7.94696072029214	0.000290147640133032	0.146710997822994	0.138712390726846	429/2668/5629	3	GE10
GO:0031667	response to nutrient levels	11/124	490/18888	0.0224489795918367	3.41948650427913	4.41128947112304	0.000387857384176046	0.146710997822994	0.138712390726846	8854/429/56477/1030/3485/10891/5629/10670/58528/6657/6772	11	GE10
GO:0046785	microtubule polymerization	5/124	95/18888	0.0526315789473684	8.0169779286927	5.57369855507579	0.000406581899499751	0.146710997822994	0.138712390726846	2288/57704/54801/4137/3925	5	GE10
GO:0031110	regulation of microtubule polymerization or depolymerization	5/124	96/18888	0.0520833333333333	7.93346774193548	5.53642262264993	0.000426692189499741	0.146710997822994	0.138712390726846	2288/57704/54801/4137/3925	5	GE10
GO:0031109	microtubule polymerization or depolymerization	7/124	135/18888	0.0518518518518519	7.89820788530466	6.53879024772408	3.06273856266625e-05	0.0514284099793667	0.0486245598855864	1410/2288/57704/54801/124602/4137/3925	7	GE10
GO:0031113	regulation of microtubule polymerization	5/124	61/18888	0.0819672131147541	12.4854574299313	7.30385719484261	4.98578865529488e-05	0.0514284099793667	0.0486245598855864	2288/57704/54801/4137/3925	5	GE10
GO:0038066	p38MAPK cascade	5/146	59/18888	0.0847457627118644	10.9635477130253	6.7651329247798	9.21899990164321e-05	0.025327009088999	0.0237216175233373	650/10912/3965/84557/5187	5	GE11
GO:0030317	flagellated sperm motility	7/146	141/18888	0.049645390070922	6.42261731273681	5.70430284230291	0.000113791790213589	0.025327009088999	0.0237216175233373	219681/80127/25790/8701/7802/54585/9576	7	GE11
GO:0060271	cilium assembly	12/146	385/18888	0.0311688311688312	4.03230741860879	5.3055751456915	4.59084587335948e-05	0.0166714222755146	0.0156146784407157	80127/118491/7802/2302/225689/6101/6103/89765/6674/9576/25876/51364	12	GE11
GO:0001539	cilium or flagellum-dependent cell motility	8/146	170/18888	0.0470588235294118	6.08799355358582	5.88154254493385	5.36489856010122e-05	0.0166714222755146	0.0156146784407157	219681/80127/25790/8701/7802/114327/54585/9576	8	GE11
GO:0060285	cilium-dependent cell motility	8/146	170/18888	0.0470588235294118	6.08799355358582	5.88154254493385	5.36489856010122e-05	0.0166714222755146	0.0156146784407157	219681/80127/25790/8701/7802/114327/54585/9576	8	GE11
GO:0044782	cilium organization	13/146	412/18888	0.0315533980582524	4.08205878441282	5.58258700509343	1.92885406150977e-05	0.00959026239382657	0.00898236880854654	80127/257177/118491/7802/2302/225689/6101/6103/89765/6674/9576/25876/51364	13	GE11
GO:0003341	cilium movement	11/146	209/18888	0.0526315789473684	6.80894015861572	7.45320704591729	6.95165681396294e-07	0.000693641519223912	0.000649673980828765	219681/80127/25790/220136/118491/8701/7802/54585/9576/25876/51364	11	GE11
GO:0035082	axoneme assembly	8/146	97/18888	0.0824742268041237	10.6696794238102	8.42699911702116	8.50389818675873e-07	0.000693641519223912	0.000649673980828765	80127/2302/6101/89765/6674/9576/25876/51364	8	GE11
GO:0007018	microtubule-based movement	15/146	426/18888	0.0352112676056338	4.55527686667953	6.55071649926262	1.11607645892826e-06	0.000693641519223912	0.000649673980828765	127829/219681/80127/25790/220136/118491/8701/7802/54585/4133/5590/6103/9576/25876/51364	15	GE11
GO:0001578	microtubule bundle formation	10/146	126/18888	0.0793650793650794	10.2674494455316	9.21204145441405	5.00927150927393e-08	0.00012453048972055	0.00011663693240541	80127/2302/6101/89765/6674/9576/25876/11076/51673/51364	10	GE11
GO:0030317	flagellated sperm motility	22/115	141/18888	0.156028368794326	25.6266419981499	22.9727207743208	3.70338244751784e-25	3.84815103410263e-23	3.78843620707806e-23	219681/80127/257062/286207/154313/80217/25790/286464/146845/144535/79846/27019/84229/219670/84223/55329/83853/9576/27285/642987/199223/164395	22	GE12
GO:0060294	cilium movement involved in cell motility	27/115	165/18888	0.163636363636364	26.8762055335968	26.1287368973067	2.16350509919919e-31	2.74765147598297e-29	2.70501397782916e-29	219681/80127/257062/286207/154313/80217/25790/286464/146845/144535/79846/56171/1770/27019/84229/219670/84223/55329/83853/345895/221421/9576/83659/27285/642987/199223/164395	27	GE12
GO:0001539	cilium or flagellum-dependent cell motility	29/115	170/18888	0.170588235294118	28.0180051150895	27.6956517102851	2.79437372947772e-34	3.99246146599129e-32	3.93050725896274e-32	219681/80127/257062/286207/154313/80217/25790/286464/146845/144535/79846/56171/1770/27019/92749/84229/219670/84223/55329/5991/83853/345895/221421/9576/83659/27285/642987/199223/164395	29	GE12
GO:0060285	cilium-dependent cell motility	29/115	170/18888	0.170588235294118	28.0180051150895	27.6956517102851	2.79437372947772e-34	3.99246146599129e-32	3.93050725896274e-32	219681/80127/257062/286207/154313/80217/25790/286464/146845/144535/79846/56171/1770/27019/92749/84229/219670/84223/55329/5991/83853/345895/221421/9576/83659/27285/642987/199223/164395	29	GE12
GO:0001578	microtubule bundle formation	27/115	126/18888	0.214285714285714	35.1950310559006	30.1420148525455	8.37030905529012e-35	1.59454387503277e-32	1.56980006668511e-32	80127/286207/154313/80217/286464/79846/387885/85452/123872/352909/56171/27019/92749/84229/2302/54768/84223/55329/89765/345895/221421/11092/200162/9576/25876/27285/51364	27	GE12
GO:0060271	cilium assembly	39/115	385/18888	0.101298701298701	16.6376510446076	24.2629932943755	3.14547390876165e-37	7.19055335542913e-35	7.07897180729727e-35	80127/8814/57562/286207/154313/80217/286464/144535/79846/118491/387885/85452/123872/352909/56171/27019/92749/84229/127254/2302/54768/84223/4117/225689/55329/5991/89765/345895/221421/11092/200162/9576/25876/83659/27285/79583/91147/127733/51364	39	GE12
GO:0035082	axoneme assembly	27/115	97/18888	0.278350515463918	45.7172568354998	34.5580831435798	3.01540245713013e-38	8.61651252124935e-36	8.4828032280845e-36	80127/286207/154313/80217/286464/79846/387885/85452/123872/352909/56171/27019/92749/84229/2302/54768/84223/55329/89765/345895/221421/11092/200162/9576/25876/27285/51364	27	GE12
GO:0044782	cilium organization	43/115	412/18888	0.104368932038835	17.1419164204306	25.9276583761162	7.79657656096349e-42	2.97049566972709e-39	2.92440012058595e-39	80127/8814/57562/257177/286207/154313/80217/286464/144535/79846/118491/387885/85452/123872/352909/56171/27019/92749/84229/127254/2302/54768/84223/124602/150082/4117/225689/55329/5991/89765/345895/221421/11092/200162/9576/25876/83659/27285/79583/91147/199223/127733/51364	43	GE12
GO:0007018	microtubule-based movement	44/115	426/18888	0.103286384976526	16.9641151255358	26.0839793396167	1.14345167067768e-42	6.53482629792292e-40	6.43342018923388e-40	219681/80127/257062/286207/154313/80217/25790/286464/146845/220136/144535/79846/118491/387885/123872/201625/56171/1770/27019/92749/84229/83657/219670/54768/84223/124602/150082/4117/4130/55329/152110/5991/83853/345895/221421/200162/9576/25876/83659/27285/642987/199223/164395/51364	44	GE12
GO:0003341	cilium movement	38/115	209/18888	0.181818181818182	29.8624505928854	32.8392405363312	2.61806170873794e-46	2.99244453308747e-43	2.94600838593775e-43	219681/80127/257062/286207/154313/80217/25790/286464/146845/220136/144535/79846/118491/387885/123872/56171/1770/27019/92749/84229/219670/54768/84223/55329/152110/5991/83853/345895/221421/200162/9576/25876/83659/27285/642987/199223/164395/51364	38	GE12
GO:0002768	immune response-regulating cell surface receptor signaling pathway	12/114	360/18888	0.0333333333333333	5.52280701754386	6.75150425605914	1.84793893596179e-06	0.000406361772017997	0.000356165914920635	660/718/3115/3119/3123/3493/3500/3502/3503/3514/3539/5336	12	GE13
GO:0002455	humoral immune response mediated by circulating immunoglobulin	6/114	56/18888	0.107142857142857	17.7518796992481	9.78283762863478	1.07514100671588e-06	0.000262692785974248	0.000230243647169215	718/722/3493/3500/3502/3503	6	GE13
GO:0002429	immune response-activating cell surface receptor signaling pathway	12/114	332/18888	0.036144578313253	5.98858592263792	7.14594757630818	7.92435031094489e-07	0.000248764666166066	0.000218035999018724	660/718/3115/3119/3123/3493/3500/3502/3503/3514/3539/5336	12	GE13
GO:0002443	leukocyte mediated immunity	14/114	469/18888	0.0298507462686567	4.94579732914375	6.74285283226277	9.0501015431038e-07	0.000248764666166066	0.000218035999018724	684/718/722/10225/3123/3493/3500/3502/3503/3514/3538/3539/5336/5551	14	GE13
GO:0006958	complement activation, classical pathway	6/114	42/18888	0.142857142857143	23.6691729323308	11.4605704816303	1.86046580855758e-07	6.81860718836354e-05	5.9763384131034e-05	718/722/3493/3500/3502/3503	6	GE13
GO:0019730	antimicrobial humoral response	9/114	132/18888	0.0681818181818182	11.2966507177033	9.25056679795822	1.0542862036702e-07	4.63675072374155e-05	4.06399587141082e-05	1755/2627/3493/3500/3502/3503/3960/5225/6590	9	GE13
GO:0050851	antigen receptor-mediated signaling pathway	11/114	208/18888	0.0528846153846154	8.76214574898785	8.77163463641682	5.29814844919437e-08	2.9126571099446e-05	2.55287100275655e-05	660/3115/3119/3123/3493/3500/3502/3503/3514/3539/5336	11	GE13
GO:0050853	B cell receptor signaling pathway	8/114	78/18888	0.102564102564103	16.9932523616734	11.0292302367741	2.26663839793446e-08	1.66144594568596e-05	1.45621575670807e-05	660/3493/3500/3502/3503/3514/3539/5336	8	GE13
GO:0006959	humoral immune response	13/114	258/18888	0.0503875968992248	8.3484292125663	9.26090543530518	5.42428156587823e-09	9.29624786859964e-06	8.14792841119454e-06	718/722/1755/2627/3119/3123/3493/3500/3502/3503/3960/5225/6590	13	GE13
GO:0019731	antibacterial humoral response	8/114	69/18888	0.115942028985507	19.209763539283	11.8082649638377	8.45497759763496e-09	9.29624786859964e-06	8.14792841119454e-06	1755/3493/3500/3502/3503/3960/5225/6590	8	GE13

## Sheet: Sheet8
Table S8. ​Top CNV genes in cells of each GE label. Related to Figure 3.
Gene	chr	start	stop	cnv_score	direction	GE_group
EFNA1	chr1	155127876	155134899	0.14555096144515	gain	GE1
PBXIP1	chr1	154944076	154956123	0.145516473656103	gain	GE1
PYGO2	chr1	154957026	154963853	0.145509001421103	gain	GE1
PMVK	chr1	154924740	154936719	0.145356936097509	gain	GE1
EFNA4	chr1	155063737	155069553	0.145355525703467	gain	GE1
SLC50A1	chr1	155135344	155138857	0.14530205351195	gain	GE1
SHC1	chr1	154962298	154974395	0.145248090557589	gain	GE1
ADAM15	chr1	155050566	155062775	0.145210458208419	gain	GE1
DPM3	chr1	155139891	155140595	0.144956419961345	gain	GE1
ZBTB7B	chr1	155002630	155018522	0.144933996121968	gain	GE1
CKS1B	chr1	154974653	154979251	0.144928388407247	gain	GE1
ADAR	chr1	154582057	154628013	0.144818406178214	gain	GE1
FLAD1	chr1	154983338	154993111	0.144636177269138	gain	GE1
KRTCAP2	chr1	155169408	155173475	0.144566032801053	gain	GE1
MUC1	chr1	155185824	155192916	0.144087170738639	gain	GE1
UBE2Q1	chr1	154548577	154559028	0.143811612617068	gain	GE1
SHE	chr1	154469772	154502412	0.142673443418045	gain	GE1
MTX1	chr1	155208699	155213824	0.142180743334892	gain	GE1
IL6R	chr1	154405193	154469450	0.141396643644243	gain	GE1
HAX1	chr1	154272589	154275875	0.140219654227891	gain	GE1
FAM189B	chr1	155247205	155255483	0.14014886128687	gain	GE1
UBAP2L	chr1	154220179	154271510	0.139027557873582	gain	GE1
SCAMP3	chr1	155255979	155262430	0.137982820018457	gain	GE1
C1orf43	chr1	154206696	154220637	0.137684806709779	gain	GE1
TPM3	chr1	154155304	154194648	0.136438077907985	gain	GE1
CLK2	chr1	155262868	155278491	0.135793513596225	gain	GE1
RPS27	chr1	153990762	153992155	0.135366803445021	gain	GE1
RAB13	chr1	153981617	153986358	0.134784014053535	gain	GE1
JTB	chr1	153974269	153977674	0.13396178024562	gain	GE1
FDPS	chr1	155308748	155320666	0.133940738855564	gain	GE1
SLC39A1	chr1	153959099	153968184	0.132996899692298	gain	GE1
CRTC2	chr1	153947669	153958615	0.132044635684574	gain	GE1
RUSC1	chr1	155320894	155331114	0.131891085807202	gain	GE1
DENND4B	chr1	153929501	153946718	0.131264214539922	gain	GE1
GATAD2B	chr1	153789030	153923360	0.130504660050958	gain	GE1
SLC27A3	chr1	153774354	153780157	0.129725710210547	gain	GE1
ASH1L	chr1	155335268	155562807	0.12971442874507	gain	GE1
INTS3	chr1	153728050	153774808	0.129104726695746	gain	GE1
ILF2	chr1	153661788	153671028	0.128349288981657	gain	GE1
YY1AP1	chr1	155659443	155689000	0.127545165325406	gain	GE1
SNAPIN	chr1	153658703	153661852	0.127314800476082	gain	GE1
CHTOP	chr1	153633982	153646306	0.126478868141771	gain	GE1
S100A13	chr1	153618787	153631360	0.125618903613211	gain	GE1
DAP3	chr1	155687960	155739010	0.125287717550218	gain	GE1
S100A14	chr1	153614255	153616986	0.124287144192332	gain	GE1
GON4L	chr1	155749662	155859400	0.122943445820449	gain	GE1
S100A16	chr1	153606886	153613145	0.122401656735389	gain	GE1
RIT1	chr1	155897808	155911404	0.120438516525524	gain	GE1
S100A2	chr1	153561108	153567890	0.120013556657957	gain	GE1
KHDC4	chr1	155913045	155934413	0.118150751850083	gain	GE1
HMGB1	chr13	30456704	30617597	-0.0880986	loss	GE1
ALOX5AP	chr13	30713478	30764426	-0.0879678	loss	GE1
UBL3	chr13	29764371	29850617	-0.0879037	loss	GE1
POMP	chr13	28659104	28678959	-0.0877044	loss	GE1
HSPH1	chr13	31134973	31162388	-0.087602	loss	GE1
PAN3	chr13	28138506	28295335	-0.0875975	loss	GE1
POLR1D	chr13	27620742	27744237	-0.0874911	loss	GE1
FRY	chr13	31846713	32299125	-0.0872632	loss	GE1
LNX2	chr13	27545913	27620529	-0.0872346	loss	GE1
N4BP2L1	chr13	32400723	32428311	-0.0870003	loss	GE1
GTF3A	chr13	27424619	27435823	-0.0869962	loss	GE1
MTIF3	chr13	27435643	27450591	-0.086992	loss	GE1
RPL21	chr13	27251309	27256691	-0.0868418	loss	GE1
N4BP2L2	chr13	32432417	32538885	-0.0866404	loss	GE1
PDS5B	chr13	32586452	32778019	-0.0862785	loss	GE1
USP12	chr13	27066156	27171811	-0.0862243	loss	GE1
SPART	chr13	36301638	36370180	-0.0858019	loss	GE1
ALG5	chr13	36949738	37000261	-0.0854369	loss	GE1
EXOSC8	chr13	36998816	37009614	-0.085048	loss	GE1
RNF6	chr13	26132115	26222314	-0.0848329	loss	GE1
SUPT20H	chr13	37009312	37059713	-0.084655	loss	GE1
UFM1	chr13	38349849	38363619	-0.0842693	loss	GE1
NHLRC3	chr13	39038306	39050109	-0.0838043	loss	GE1
SHISA2	chr13	26044597	26052016	-0.0833551	loss	GE1
MRPS31	chr13	40729128	40771190	-0.083313	loss	GE1
ELF1	chr13	40931924	41061440	-0.0828864	loss	GE1
WBP4	chr13	41061509	41084006	-0.0820135	loss	GE1
NUP58	chr13	25301556	25349800	-0.081839	loss	GE1
RGCC	chr13	41457550	41470871	-0.0811698	loss	GE1
MTMR6	chr13	25246201	25288009	-0.0803454	loss	GE1
DGKH	chr13	42040036	42256578	-0.0801173	loss	GE1
AKAP11	chr13	42272152	42323261	-0.0790736	loss	GE1
RPL34P27	chr13	24988577	24988925	-0.0789088	loss	GE1
EPSTI1	chr13	42886388	42992271	-0.0779193	loss	GE1
PARP4	chr13	24420931	24512778	-0.0776113	loss	GE1
DNAJC15	chr13	43023203	43114213	-0.0767523	loss	GE1
SPATA13	chr13	23979805	24307074	-0.0761387	loss	GE1
TSC22D1	chr13	44432143	44577147	-0.0754606	loss	GE1
MICU2	chr13	21492691	21604181	-0.074592	loss	GE1
GPALPP1	chr13	44989529	45037669	-0.0744567	loss	GE1
GTF2F2	chr13	45120510	45284893	-0.0734368	loss	GE1
ZDHHC20	chr13	21372573	21459370	-0.0730042	loss	GE1
TPT1	chr13	45333471	45341284	-0.0721988	loss	GE1
MRPL57	chr13	21176658	21179084	-0.071574	loss	GE1
COG3	chr13	45464898	45536701	-0.0709168	loss	GE1
SAP18	chr13	21140514	21149084	-0.0701493	loss	GE1
ZC3H13	chr13	45954465	46052759	-0.0696261	loss	GE1
LATS2	chr13	20973036	21061586	-0.0689216	loss	GE1
LCP1	chr13	46125920	46211871	-0.0682494	loss	GE1
CRYL1	chr13	20403666	20525873	-0.0678695	loss	GE1
ARHGEF2	chr1	155946851	156007070	0.357111982912225	gain	GE2
KHDC4	chr1	155913045	155934413	0.356627229777302	gain	GE2
RIT1	chr1	155897808	155911404	0.356383507001671	gain	GE2
SSR2	chr1	156009048	156020951	0.356371626291044	gain	GE2
GON4L	chr1	155749662	155859400	0.35615653935278	gain	GE2
DAP3	chr1	155687960	155739010	0.356023132425188	gain	GE2
YY1AP1	chr1	155659443	155689000	0.355946093761186	gain	GE2
ASH1L	chr1	155335268	155562807	0.355787575533896	gain	GE2
RUSC1	chr1	155320894	155331114	0.355314740517545	gain	GE2
UBQLN4	chr1	156035299	156053798	0.355275341992528	gain	GE2
LAMTOR2	chr1	156054782	156058506	0.354993724475087	gain	GE2
RAB25	chr1	156061160	156070504	0.354540947211935	gain	GE2
FDPS	chr1	155308748	155320666	0.354310742805989	gain	GE2
MEX3A	chr1	156072013	156082465	0.353299765500505	gain	GE2
CLK2	chr1	155262868	155278491	0.353181652163517	gain	GE2
SCAMP3	chr1	155255979	155262430	0.35223510536711	gain	GE2
LMNA	chr1	156082573	156140089	0.351651141016565	gain	GE2
FAM189B	chr1	155247205	155255483	0.351281541806071	gain	GE2
MTX1	chr1	155208699	155213824	0.350089237813065	gain	GE2
SEMA4A	chr1	156147366	156177752	0.349470124778456	gain	GE2
MUC1	chr1	155185824	155192916	0.348841642430444	gain	GE2
SLC25A44	chr1	156193932	156212796	0.348219069836314	gain	GE2
PMF1	chr1	156212993	156240042	0.346895590312216	gain	GE2
KRTCAP2	chr1	155169408	155173475	0.346271360631573	gain	GE2
SMG5	chr1	156249224	156282825	0.345184494885964	gain	GE2
DPM3	chr1	155139891	155140595	0.344326562204871	gain	GE2
GLMP	chr1	156290089	156295689	0.34326075555203	gain	GE2
SLC50A1	chr1	155135344	155138857	0.342662555792043	gain	GE2
CCT3	chr1	156308968	156367873	0.341503039344489	gain	GE2
EFNA1	chr1	155127876	155134899	0.341011947232829	gain	GE2
EFNA4	chr1	155063737	155069553	0.339378454100339	gain	GE2
MEF2D	chr1	156463727	156500779	0.339126002249611	gain	GE2
ADAM15	chr1	155050566	155062775	0.337940214733914	gain	GE2
NAXE	chr1	156591762	156594299	0.337514820484793	gain	GE2
ZBTB7B	chr1	155002630	155018522	0.336363805127877	gain	GE2
GPATCH4	chr1	156594487	156601496	0.335714403080077	gain	GE2
FLAD1	chr1	154983338	154993111	0.334855166070684	gain	GE2
CKS1B	chr1	154974653	154979251	0.334632135611782	gain	GE2
SHC1	chr1	154962298	154974395	0.334483591164945	gain	GE2
CRABP2	chr1	156699606	156705816	0.334402352265898	gain	GE2
PYGO2	chr1	154957026	154963853	0.334373758659345	gain	GE2
PBXIP1	chr1	154944076	154956123	0.334122483912298	gain	GE2
PMVK	chr1	154924740	154936719	0.333486763102623	gain	GE2
ADAR	chr1	154582057	154628013	0.332553138701257	gain	GE2
ISG20L2	chr1	156721891	156728766	0.330810171137311	gain	GE2
UBE2Q1	chr1	154548577	154559028	0.330485883426196	gain	GE2
SHE	chr1	154469772	154502412	0.327637006780284	gain	GE2
RRNAD1	chr1	156728442	156736960	0.327074610613101	gain	GE2
IL6R	chr1	154405193	154469450	0.32480835264913	gain	GE2
MRPL24	chr1	156737303	156741590	0.323850269012007	gain	GE2
RPL21	chr13	27251309	27256691	-0.128705	loss	GE2
GTF3A	chr13	27424619	27435823	-0.127908	loss	GE2
USP12	chr13	27066156	27171811	-0.127819	loss	GE2
MTIF3	chr13	27435643	27450591	-0.127163	loss	GE2
LNX2	chr13	27545913	27620529	-0.126372	loss	GE2
RNF6	chr13	26132115	26222314	-0.126119	loss	GE2
POLR1D	chr13	27620742	27744237	-0.125643	loss	GE2
PAN3	chr13	28138506	28295335	-0.124836	loss	GE2
SHISA2	chr13	26044597	26052016	-0.124399	loss	GE2
POMP	chr13	28659104	28678959	-0.124124	loss	GE2
UBL3	chr13	29764371	29850617	-0.123592	loss	GE2
HMGB1	chr13	30456704	30617597	-0.123026	loss	GE2
NUP58	chr13	25301556	25349800	-0.12263	loss	GE2
ALOX5AP	chr13	30713478	30764426	-0.122235	loss	GE2
HSPH1	chr13	31134973	31162388	-0.121197	loss	GE2
MTMR6	chr13	25246201	25288009	-0.121123	loss	GE2
FRY	chr13	31846713	32299125	-0.120319	loss	GE2
N4BP2L1	chr13	32400723	32428311	-0.119757	loss	GE2
RPL34P27	chr13	24988577	24988925	-0.119332	loss	GE2
N4BP2L2	chr13	32432417	32538885	-0.119164	loss	GE2
PDS5B	chr13	32586452	32778019	-0.11842	loss	GE2
PARP4	chr13	24420931	24512778	-0.11792	loss	GE2
SPART	chr13	36301638	36370180	-0.117694	loss	GE2
ALG5	chr13	36949738	37000261	-0.117008	loss	GE2
SPATA13	chr13	23979805	24307074	-0.116289	loss	GE2
EXOSC8	chr13	36998816	37009614	-0.11624	loss	GE2
SUPT20H	chr13	37009312	37059713	-0.115534	loss	GE2
MICU2	chr13	21492691	21604181	-0.114778	loss	GE2
UFM1	chr13	38349849	38363619	-0.11472	loss	GE2
NHLRC3	chr13	39038306	39050109	-0.113815	loss	GE2
MRPS31	chr13	40729128	40771190	-0.113019	loss	GE2
ZDHHC20	chr13	21372573	21459370	-0.112993	loss	GE2
ELF1	chr13	40931924	41061440	-0.111795	loss	GE2
MRPL57	chr13	21176658	21179084	-0.110995	loss	GE2
WBP4	chr13	41061509	41084006	-0.110231	loss	GE2
SAP18	chr13	21140514	21149084	-0.109466	loss	GE2
RGCC	chr13	41457550	41470871	-0.108447	loss	GE2
LATS2	chr13	20973036	21061586	-0.107938	loss	GE2
CRYL1	chr13	20403666	20525873	-0.10676	loss	GE2
DGKH	chr13	42040036	42256578	-0.106258	loss	GE2
ZMYM2	chr13	19958670	20091829	-0.105414	loss	GE2
RPL15	chr3	23916591	23924374	-0.105066	loss	GE2
UBE2E1	chr3	23805955	23891640	-0.104777	loss	GE2
NR1D2	chr3	23945286	23980617	-0.104675	loss	GE2
UBE2E2	chr3	23203020	23591794	-0.104388	loss	GE2
TOP2B	chr3	25597905	25664907	-0.10422	loss	GE2
RAB5A	chr3	19947097	19985175	-0.104117	loss	GE2
AKAP11	chr13	42272152	42323261	-0.104014	loss	GE2
NGLY1	chr3	25718944	25790039	-0.103972	loss	GE2
ZMYM5	chr13	19823482	19863649	-0.103808	loss	GE2
S100A14	chr1	153614255	153616986	0.30511361309217	gain	GE3
S100A16	chr1	153606886	153613145	0.304812190105493	gain	GE3
S100A13	chr1	153618787	153631360	0.303660905130575	gain	GE3
S100A2	chr1	153561108	153567890	0.302948396729377	gain	GE3
CHTOP	chr1	153633982	153646306	0.301178164438561	gain	GE3
S100A4	chr1	153543613	153550136	0.300149480386223	gain	GE3
SNAPIN	chr1	153658703	153661852	0.298678568223185	gain	GE3
ILF2	chr1	153661788	153671028	0.296497966583414	gain	GE3
S100A6	chr1	153534599	153536244	0.295680344672443	gain	GE3
INTS3	chr1	153728050	153774808	0.294039176330931	gain	GE3
SLC27A3	chr1	153774354	153780157	0.291437396015819	gain	GE3
S100A7	chr1	153457744	153460651	0.289278879513087	gain	GE3
GATAD2B	chr1	153789030	153923360	0.288953912164693	gain	GE3
DENND4B	chr1	153929501	153946718	0.286609398104649	gain	GE3
CRTC2	chr1	153947669	153958615	0.2842311493996	gain	GE3
S100A8	chr1	153390032	153391073	0.282866020775984	gain	GE3
SLC39A1	chr1	153959099	153968184	0.282214151003368	gain	GE3
JTB	chr1	153974269	153977674	0.280044097659615	gain	GE3
RAB13	chr1	153981617	153986358	0.277539776678063	gain	GE3
S100A9	chr1	153357854	153361023	0.276719407355873	gain	GE3
RPS27	chr1	153990762	153992155	0.274812172372635	gain	GE3
TPM3	chr1	154155304	154194648	0.271823545223421	gain	GE3
SPRR2A	chr1	153056120	153057512	0.270191646528802	gain	GE3
C1orf43	chr1	154206696	154220637	0.268977174570645	gain	GE3
UBAP2L	chr1	154220179	154271510	0.266059592030332	gain	GE3
SPRR2D	chr1	153039732	153041931	0.263771503930011	gain	GE3
HAX1	chr1	154272589	154275875	0.263324421994181	gain	GE3
IL6R	chr1	154405193	154469450	0.260055106977306	gain	GE3
SPRR1B	chr1	153031203	153032900	0.257357168945153	gain	GE3
SHE	chr1	154469772	154502412	0.256901475704813	gain	GE3
UBE2Q1	chr1	154548577	154559028	0.253642859757705	gain	GE3
SPRR3	chr1	153001747	153003856	0.251136799659107	gain	GE3
ADAR	chr1	154582057	154628013	0.250256058707531	gain	GE3
PMVK	chr1	154924740	154936719	0.246700518740771	gain	GE3
S100A11	chr1	152032506	152047907	0.245097630760394	gain	GE3
PBXIP1	chr1	154944076	154956123	0.242813848906544	gain	GE3
PYGO2	chr1	154957026	154963853	0.238776886234112	gain	GE3
S100A10	chr1	151982915	151993859	0.238628345941279	gain	GE3
CHCHD2	chr7	56101573	56106476	0.237771921547918	gain	GE3
NUPR2	chr7	56114681	56116417	0.237696178601974	gain	GE3
ZNF117	chr7	64971772	65006684	0.236471690313151	gain	GE3
SUMF2	chr7	56064002	56080670	0.236041077278939	gain	GE3
ERV3-1	chr7	64990356	65006743	0.235056658402799	gain	GE3
SHC1	chr1	154962298	154974395	0.234625431717966	gain	GE3
VKORC1L1	chr7	65873074	65959563	0.233569782332991	gain	GE3
CCT6A	chr7	56051685	56063989	0.233454269400335	gain	GE3
GUSB	chr7	65960684	65982215	0.232022765196263	gain	GE3
THEM4	chr1	151870866	151909637	0.230685647177428	gain	GE3
ASL	chr7	66075800	66094697	0.230334341283184	gain	GE3
CKS1B	chr1	154974653	154979251	0.230264129906366	gain	GE3
VIM	chr10	17228241	17237593	-0.109411	loss	GE3
MRC1	chr10	17809348	17911164	-0.109328	loss	GE3
RSU1	chr10	16590611	16817463	-0.109328	loss	GE3
ARL5B	chr10	18659431	18681639	-0.109259	loss	GE3
PTER	chr10	16436943	16513745	-0.109209	loss	GE3
RPP38	chr10	15097180	15139818	-0.10908	loss	GE3
PLXDC2	chr10	19816239	20289856	-0.109064	loss	GE3
FAM107B	chr10	14518557	14774897	-0.109011	loss	GE3
NEBL	chr10	20779973	21174187	-0.108897	loss	GE3
MLLT10	chr10	21524646	21743630	-0.108815	loss	GE3
DNAJC1	chr10	21756548	22003769	-0.108717	loss	GE3
PRPF18	chr10	13586939	13630859	-0.108712	loss	GE3
COMMD3	chr10	22316386	22320306	-0.108544	loss	GE3
BMI1	chr10	22321099	22331484	-0.108417	loss	GE3
SEPHS1	chr10	13317428	13348298	-0.108372	loss	GE3
PIP4K2A	chr10	22534854	22714578	-0.108313	loss	GE3
PHYH	chr10	13277796	13302412	-0.1081	loss	GE3
MSRB2	chr10	23095579	23122013	-0.107953	loss	GE3
OPTN	chr10	13099449	13138308	-0.10778	loss	GE3
OTUD1	chr10	23439458	23442390	-0.107693	loss	GE3
CAMK1D	chr10	12349482	12835545	-0.107343	loss	GE3
KIAA1217	chr10	23694746	24547848	-0.107259	loss	GE3
ARHGAP21	chr10	24583609	24723887	-0.106972	loss	GE3
CDC123	chr10	12195965	12250589	-0.106943	loss	GE3
NUDT5	chr10	12165330	12196144	-0.106629	loss	GE3
APBB1IP	chr10	26438341	26567803	-0.10639	loss	GE3
DHTKD1	chr10	12068954	12123221	-0.106346	loss	GE3
UPF2	chr10	11920022	12043170	-0.106086	loss	GE3
USP6NL	chr10	11453946	11611754	-0.105751	loss	GE3
ABI1	chr10	26746593	26861087	-0.105566	loss	GE3
CELF2	chr10	10798397	11336675	-0.105435	loss	GE3
SFTA1P	chr10	10784437	10795047	-0.104845	loss	GE3
ANKRD26	chr10	26991914	27100498	-0.104645	loss	GE3
TAF3	chr10	7818505	8016631	-0.104284	loss	GE3
YME1L1	chr10	27110112	27155266	-0.10383	loss	GE3
ATP5F1C	chr10	7788147	7807815	-0.103582	loss	GE3
KIN	chr10	7750962	7787993	-0.103186	loss	GE3
KLF6	chr10	3775996	3785281	-0.103163	loss	GE3
IDI1	chr10	1039152	1049170	-0.103125	loss	GE3
PITRM1	chr10	3137728	3172841	-0.102994	loss	GE3
PFKP	chr10	3066333	3137718	-0.102959	loss	GE3
GTPBP4	chr10	988434	1019932	-0.102957	loss	GE3
PFKFB3	chr10	6144934	6254644	-0.102903	loss	GE3
ACBD5	chr10	27195214	27242130	-0.102867	loss	GE3
LARP4B	chr10	806914	931705	-0.102807	loss	GE3
AKR1C1	chr10	4963253	4983283	-0.102692	loss	GE3
ZMYND11	chr10	134465	254637	-0.102645	loss	GE3
RBM17	chr10	6089034	6117457	-0.102573	loss	GE3
AKR1C2	chr10	4987400	5018031	-0.102334	loss	GE3
GDI2	chr10	5765223	5842132	-0.102232	loss	GE3
IFNAR2	chr21	33229901	33265675	0.133790590047428	gain	GE4
PAXBP1	chr21	32733899	32771792	0.133184806013741	gain	GE4
IL10RB	chr21	33266367	33310187	0.133181853189184	gain	GE4
CFAP298	chr21	32592079	32612603	0.132942157450097	gain	GE4
EVA1C	chr21	32412006	32515397	0.132796169351086	gain	GE4
IFNAR1	chr21	33324429	33359864	0.132689483582285	gain	GE4
APP	chr21	25880550	26171128	0.132449854896256	gain	GE4
LTN1	chr21	28928144	28992956	0.132428016687493	gain	GE4
SCAF4	chr21	31671000	31732118	0.132423755826182	gain	GE4
ADAMTS1	chr21	26835755	26845409	0.13239180509483	gain	GE4
SOD1	chr21	31659666	31668931	0.132317472897359	gain	GE4
USP16	chr21	29024629	29054488	0.13229747260662	gain	GE4
IFNGR2	chr21	33402896	33479348	0.132224935445455	gain	GE4
BACH1	chr21	29194071	29630751	0.132205601180864	gain	GE4
CCT8	chr21	29055805	29073797	0.132179114944007	gain	GE4
BTG3	chr21	17593653	17612945	0.132140956531632	gain	GE4
ATP5PF	chr21	25716503	25735673	0.13210133005317	gain	GE4
C21orf91	chr21	17788974	17819386	0.132025877574445	gain	GE4
CXADR	chr21	17513043	17593579	0.131995655691626	gain	GE4
TMEM50B	chr21	33432485	33479974	0.131976544499381	gain	GE4
PPIAP22	chr21	18857779	18858276	0.13190344754345	gain	GE4
GART	chr21	33503931	33543491	0.131733112878635	gain	GE4
SON	chr21	33543038	33577481	0.131452967398175	gain	GE4
CRYZL1	chr21	33589341	33643926	0.130867691611762	gain	GE4
USP25	chr21	15730025	15880069	0.130258958853353	gain	GE4
ITSN1	chr21	33642400	33899861	0.130082891701291	gain	GE4
NRIP1	chr21	14961235	15065936	0.129479849483434	gain	GE4
ATP5PO	chr21	33903453	33915814	0.129244865793995	gain	GE4
SAMSN1	chr21	14485228	14658821	0.128182480943037	gain	GE4
MRPS6	chr21	34073224	34143034	0.127515343168051	gain	GE4
HSPA13	chr21	14371115	14383484	0.127481249767154	gain	GE4
SLC5A3	chr21	34073578	34106260	0.12713310255419	gain	GE4
RCAN1	chr21	34513142	34615113	0.126666039970116	gain	GE4
CLIC6	chr21	34669389	34718227	0.126335402482069	gain	GE4
RUNX1	chr21	34787801	36004667	0.125274799492854	gain	GE4
CBR1	chr21	36069941	36073166	0.124022406204073	gain	GE4
MORC3	chr21	36320189	36386148	0.122850593266707	gain	GE4
PIGP	chr21	37059170	37073170	0.121775835216837	gain	GE4
TTC3	chr21	37073226	37203112	0.120797690980112	gain	GE4
DYRK1A	chr21	37365573	37526358	0.119232288699393	gain	GE4
MRPL13	chr8	120380761	120445402	0.119011615158252	gain	GE4
SNTB1	chr8	120535745	120813273	0.118829139011031	gain	GE4
MAL2	chr8	119165034	119245673	0.118583128861891	gain	GE4
DERL1	chr8	123013170	123042302	0.118457331625037	gain	GE4
TAF2	chr8	119730774	119832841	0.11833588771593	gain	GE4
FAM83A	chr8	123178960	123210079	0.118207196214695	gain	GE4
DEPTOR	chr8	119873717	120050918	0.118115875649745	gain	GE4
KCNJ15	chr21	38155549	38307357	0.117662857290388	gain	GE4
C8orf76	chr8	123219967	123241377	0.117661693767258	gain	GE4
CD46	chr1	207752054	207795513	0.117083809930011	gain	GE4
DEF8	chr16	89947925	89968060	-0.116163	loss	GE4
TCF25	chr16	89873570	89913627	-0.115331	loss	GE4
CDK10	chr16	89680737	89696354	-0.114393	loss	GE4
CHMP1A	chr16	89644435	89657721	-0.113593	loss	GE4
RPL13	chr16	89560657	89566828	-0.112881	loss	GE4
SPG7	chr16	89490719	89557766	-0.111421	loss	GE4
ANKRD11	chr16	89267630	89490561	-0.110272	loss	GE4
HLA-B	chr6	31269491	31357188	-0.110119	loss	GE4
HCP5	chr6	31463170	31478936	-0.109622	loss	GE4
HLA-C	chr6	31268749	31272130	-0.109565	loss	GE4
DDX39B	chr6	31530219	31542448	-0.109285	loss	GE4
SLC22A31	chr16	89195761	89201651	-0.109135	loss	GE4
NFKBIL1	chr6	31546870	31558829	-0.10903	loss	GE4
TNF	chr6	31575565	31578336	-0.108782	loss	GE4
MUC21	chr6	30983718	30989903	-0.108592	loss	GE4
LTB	chr6	31580525	31582522	-0.10842	loss	GE4
TRAPPC2L	chr16	88856220	88862686	-0.108411	loss	GE4
LST1	chr6	31586124	31588909	-0.10795	loss	GE4
APRT	chr16	88809339	88811937	-0.107709	loss	GE4
AIF1	chr6	31615217	31617021	-0.107483	loss	GE4
PRRC2A	chr6	31620715	31637771	-0.107045	loss	GE4
PIEZO1	chr16	88715338	88785220	-0.106823	loss	GE4
BAG6	chr6	31639028	31652705	-0.106632	loss	GE4
GPANK1	chr6	31661228	31666283	-0.106216	loss	GE4
RNF166	chr16	88696499	88706408	-0.106016	loss	GE4
CSNK2B	chr6	31665236	31670343	-0.105778	loss	GE4
DDAH2	chr6	31727038	31730617	-0.105233	loss	GE4
MVD	chr16	88651935	88663161	-0.105171	loss	GE4
CLIC1	chr6	31730581	31739763	-0.104642	loss	GE4
CYBA	chr16	88643289	88651054	-0.104384	loss	GE4
LSM2	chr6	31797396	31806966	-0.103832	loss	GE4
SFTA2	chr6	30931353	30955636	-0.103578	loss	GE4
ZC3H18	chr16	88570381	88631966	-0.102977	loss	GE4
SLC7A5	chr16	87830023	87869507	-0.101626	loss	GE4
HSPA1A	chr6	31815543	31817946	-0.10039	loss	GE4
MAP1LC3B	chr16	87383953	87404779	-0.10018	loss	GE4
HSPA1B	chr6	31827738	31830254	-0.0989414	loss	GE4
DDR1	chr6	30876421	30900156	-0.0988097	loss	GE4
IRF8	chr16	85899162	85922606	-0.0985712	loss	GE4
NEU1	chr6	31857659	31862822	-0.0972975	loss	GE4
COX4I1	chr16	85798633	85807068	-0.0968034	loss	GE4
IER3	chr6	30743199	30744548	-0.0956358	loss	GE4
SLC44A4	chr6	31863192	31879046	-0.0955238	loss	GE4
EMC8	chr16	85771758	85799608	-0.0945231	loss	GE4
EHMT2	chr6	31879759	31897687	-0.0938711	loss	GE4
GSE1	chr16	85169525	85676204	-0.0923195	loss	GE4
C2	chr6	31897785	31945672	-0.0922685	loss	GE4
NELFE	chr6	31952087	31959038	-0.0907162	loss	GE4
FLOT1	chr6	30727709	30742732	-0.0904102	loss	GE4
ZDHHC7	chr16	84974175	85011535	-0.0902368	loss	GE4
PIGR	chr1	206928522	206946466	0.123889347209888	gain	GE5
C1orf116	chr1	207018522	207032756	0.123286639256106	gain	GE5
C4BPA	chr1	207104233	207144972	0.123105630116743	gain	GE5
PFKFB2	chr1	207034366	207081024	0.123032538529925	gain	GE5
YOD1	chr1	207043849	207052980	0.122850578077785	gain	GE5
C4BPB	chr1	207088860	207099993	0.122814010948451	gain	GE5
CD55	chr1	207321532	207386804	0.122702026311942	gain	GE5
MAPKAPK2	chr1	206684905	206734281	0.121966611133283	gain	GE5
CD46	chr1	207752054	207795513	0.121303218027754	gain	GE5
EIF2D	chr1	206571292	206612465	0.119975661834893	gain	GE5
MIR29B2CHG	chr1	207801518	207879115	0.118635682346942	gain	GE5
RASSF5	chr1	206507531	206589448	0.117249894447454	gain	GE5
PLXNA2	chr1	208022242	208244384	0.116669517050602	gain	GE5
SRGAP2	chr1	206203345	206464443	0.11521320095361	gain	GE5
MIR205HG	chr1	209428817	209432838	0.1143219613323	gain	GE5
CTSE	chr1	206009264	206023895	0.113550270939652	gain	GE5
LAMB3	chr1	209614870	209652425	0.112141623953924	gain	GE5
SLC41A1	chr1	205789094	205813748	0.111626406998231	gain	GE5
RAB29	chr1	205767986	205775482	0.109991235846194	gain	GE5
G0S2	chr1	209675412	209676390	0.109857582698006	gain	GE5
PMVK	chr1	154924740	154936719	0.108868747148588	gain	GE5
PBXIP1	chr1	154944076	154956123	0.10877933422971	gain	GE5
PYGO2	chr1	154957026	154963853	0.108427349533906	gain	GE5
SHC1	chr1	154962298	154974395	0.10833487154007	gain	GE5
ADAR	chr1	154582057	154628013	0.108008151647398	gain	GE5
IRF6	chr1	209785617	209806175	0.107984813032222	gain	GE5
CKS1B	chr1	154974653	154979251	0.107794371224453	gain	GE5
UBE2Q1	chr1	154548577	154559028	0.107632026090138	gain	GE5
ZBTB7B	chr1	155002630	155018522	0.107461525311186	gain	GE5
ADAM15	chr1	155050566	155062775	0.107360407541348	gain	GE5
EFNA4	chr1	155063737	155069553	0.107298278130391	gain	GE5
NUCKS1	chr1	205712822	205750182	0.107240330219334	gain	GE5
FLAD1	chr1	154983338	154993111	0.10723344130746	gain	GE5
EFNA1	chr1	155127876	155134899	0.107144732367954	gain	GE5
SLC50A1	chr1	155135344	155138857	0.106951887322221	gain	GE5
SHE	chr1	154469772	154502412	0.106771900885494	gain	GE5
DPM3	chr1	155139891	155140595	0.106619874523773	gain	GE5
KRTCAP2	chr1	155169408	155173475	0.106213605800667	gain	GE5
SERTAD4-AS1	chr1	210231456	210234047	0.1059301389206	gain	GE5
IL6R	chr1	154405193	154469450	0.1058411854415	gain	GE5
MUC1	chr1	155185824	155192916	0.105674505875893	gain	GE5
HAX1	chr1	154272589	154275875	0.104939112119009	gain	GE5
ELK4	chr1	205597556	205632011	0.104823173374953	gain	GE5
SERTAD4	chr1	210232796	210246631	0.104559586850896	gain	GE5
MTX1	chr1	155208699	155213824	0.104002837425996	gain	GE5
UBAP2L	chr1	154220179	154271510	0.103944215530973	gain	GE5
C1orf43	chr1	154206696	154220637	0.103319781871113	gain	GE5
MFSD4A	chr1	205568885	205602918	0.103220957968636	gain	GE5
RCOR3	chr1	211258377	211316385	0.102935744206236	gain	GE5
TPM3	chr1	154155304	154194648	0.102662699250629	gain	GE5
POLR1D	chr13	27620742	27744237	-0.0882951	loss	GE5
GTF3A	chr13	27424619	27435823	-0.0882655	loss	GE5
MTIF3	chr13	27435643	27450591	-0.0882365	loss	GE5
RPL21	chr13	27251309	27256691	-0.088212	loss	GE5
PAN3	chr13	28138506	28295335	-0.0879278	loss	GE5
LNX2	chr13	27545913	27620529	-0.0878866	loss	GE5
HMGB1	chr13	30456704	30617597	-0.087522	loss	GE5
UBL3	chr13	29764371	29850617	-0.0873614	loss	GE5
POMP	chr13	28659104	28678959	-0.0872258	loss	GE5
USP12	chr13	27066156	27171811	-0.0867895	loss	GE5
ALOX5AP	chr13	30713478	30764426	-0.0866378	loss	GE5
HSPH1	chr13	31134973	31162388	-0.0860462	loss	GE5
FRY	chr13	31846713	32299125	-0.0858047	loss	GE5
N4BP2L1	chr13	32400723	32428311	-0.0852785	loss	GE5
RNF6	chr13	26132115	26222314	-0.0852418	loss	GE5
N4BP2L2	chr13	32432417	32538885	-0.084786	loss	GE5
SHISA2	chr13	26044597	26052016	-0.0843271	loss	GE5
PDS5B	chr13	32586452	32778019	-0.0841938	loss	GE5
SPART	chr13	36301638	36370180	-0.0832666	loss	GE5
NUP58	chr13	25301556	25349800	-0.0831075	loss	GE5
ALG5	chr13	36949738	37000261	-0.083066	loss	GE5
EXOSC8	chr13	36998816	37009614	-0.082939	loss	GE5
SUPT20H	chr13	37009312	37059713	-0.0824391	loss	GE5
UFM1	chr13	38349849	38363619	-0.082291	loss	GE5
NHLRC3	chr13	39038306	39050109	-0.0817508	loss	GE5
MRPS31	chr13	40729128	40771190	-0.0815488	loss	GE5
ELF1	chr13	40931924	41061440	-0.0809831	loss	GE5
MTMR6	chr13	25246201	25288009	-0.0808776	loss	GE5
RPL34P27	chr13	24988577	24988925	-0.0796988	loss	GE5
WBP4	chr13	41061509	41084006	-0.0794785	loss	GE5
RGCC	chr13	41457550	41470871	-0.0787208	loss	GE5
PARP4	chr13	24420931	24512778	-0.0783964	loss	GE5
SPATA13	chr13	23979805	24307074	-0.0778445	loss	GE5
DGKH	chr13	42040036	42256578	-0.0775352	loss	GE5
MICU2	chr13	21492691	21604181	-0.0772467	loss	GE5
AKAP11	chr13	42272152	42323261	-0.0763608	loss	GE5
ZDHHC20	chr13	21372573	21459370	-0.0759748	loss	GE5
EPSTI1	chr13	42886388	42992271	-0.075185	loss	GE5
MRPL57	chr13	21176658	21179084	-0.0750394	loss	GE5
DNAJC15	chr13	43023203	43114213	-0.0739935	loss	GE5
SAP18	chr13	21140514	21149084	-0.0737725	loss	GE5
LATS2	chr13	20973036	21061586	-0.0732695	loss	GE5
CRYL1	chr13	20403666	20525873	-0.0725023	loss	GE5
TSC22D1	chr13	44432143	44577147	-0.0724418	loss	GE5
ZMYM2	chr13	19958670	20091829	-0.0717409	loss	GE5
GPALPP1	chr13	44989529	45037669	-0.0714066	loss	GE5
ZMYM5	chr13	19823482	19863649	-0.0706123	loss	GE5
PSPC1	chr13	19674752	19783019	-0.0702051	loss	GE5
GTF2F2	chr13	45120510	45284893	-0.0700296	loss	GE5
MPHOSPH8	chr13	19633659	19673441	-0.0698513	loss	GE5
C8orf33	chr8	145052465	145066685	0.247080756174984	gain	GE6
COMMD5	chr8	144841042	144853736	0.246385394242845	gain	GE6
RPL8	chr8	144789765	144792587	0.246220454782758	gain	GE6
C8orf82	chr8	144525733	144529132	0.244446846582058	gain	GE6
PPP1R16A	chr8	144477969	144502121	0.242702263711342	gain	GE6
CYHR1	chr8	144449582	144465677	0.24134781211631	gain	GE6
VPS28	chr8	144423601	144428563	0.239969820855056	gain	GE6
SLC39A4	chr8	144409742	144416844	0.238658063804414	gain	GE6
CPSF1	chr8	144393229	144409335	0.237458190217735	gain	GE6
SLC52A2	chr8	144354135	144361272	0.236565865410908	gain	GE6
DGAT1	chr8	144314584	144326910	0.235601096452898	gain	GE6
HSF1	chr8	144291591	144314720	0.234713463816537	gain	GE6
BOP1	chr8	144262045	144291438	0.234009710322891	gain	GE6
MROH1	chr8	144148016	144261940	0.233380816638061	gain	GE6
MAF1	chr8	144104461	144107611	0.23281075562496	gain	GE6
SHARPIN	chr8	144098633	144108124	0.232137619166191	gain	GE6
CYC1	chr8	144095039	144097525	0.231446490604038	gain	GE6
GPAA1	chr8	144082590	144086216	0.230346495085296	gain	GE6
EXOSC4	chr8	144078648	144080648	0.229306980597795	gain	GE6
GRINA	chr8	143990056	143993415	0.228118393338632	gain	GE6
PARP10	chr8	143977153	144012772	0.226514912503488	gain	GE6
PLEC	chr8	143915147	143976734	0.224815866748244	gain	GE6
EPPK1	chr8	143857324	143878467	0.223831493577444	gain	GE6
NRBP2	chr8	143833583	143840973	0.223058401461733	gain	GE6
PUF60	chr8	143816344	143829352	0.222402634385527	gain	GE6
SCRIB	chr8	143790920	143815773	0.22166538641324	gain	GE6
FAM83H	chr8	143723933	143738234	0.220954782511553	gain	GE6
TSTA3	chr8	143612618	143618048	0.220246664250966	gain	GE6
EEF1D	chr8	143579697	143599541	0.21950985599163	gain	GE6
NAPRT	chr8	143574785	143578649	0.217387625493783	gain	GE6
MROH6	chr8	143566192	143572772	0.215107713732388	gain	GE6
GSDMD	chr8	143553207	143563062	0.213171331874045	gain	GE6
RHPN1	chr8	143368876	143384221	0.211435822319031	gain	GE6
LY6E	chr8	143017982	143023832	0.210147438020508	gain	GE6
LY6D	chr8	142784882	142786539	0.207987174089667	gain	GE6
THEM6	chr8	142727223	142736927	0.206002231557361	gain	GE6
LY6K	chr8	142700111	142705127	0.20417957256788	gain	GE6
PSCA	chr8	142670308	142682725	0.201751270964133	gain	GE6
PTP4A3	chr8	141391995	141432454	0.199267665121826	gain	GE6
DENND3	chr8	141117278	141195808	0.196890240025101	gain	GE6
TCEA1	chr8	53966552	54022456	0.196008670245203	gain	GE6
LYPLA1	chr8	54046367	54102017	0.195920913356417	gain	GE6
ATP6V1H	chr8	53715543	53843558	0.195836587260102	gain	GE6
RB1CC1	chr8	52622458	52745843	0.195483266953093	gain	GE6
MRPL15	chr8	54135241	54148514	0.195408750725739	gain	GE6
PCMTD1	chr8	51817575	51899186	0.194928138411447	gain	GE6
UBE2V2	chr8	48008415	48064708	0.194795187848807	gain	GE6
PTK2	chr8	140657900	141002216	0.194735441804127	gain	GE6
TMEM68	chr8	55696424	55773407	0.194689874871638	gain	GE6
MCM4	chr8	47960185	47978160	0.194403680762235	gain	GE6
HSPH1	chr13	31134973	31162388	-0.0962323	loss	GE6
ALOX5AP	chr13	30713478	30764426	-0.0961473	loss	GE6
FRY	chr13	31846713	32299125	-0.0960214	loss	GE6
N4BP2L1	chr13	32400723	32428311	-0.0958622	loss	GE6
HMGB1	chr13	30456704	30617597	-0.0958542	loss	GE6
N4BP2L2	chr13	32432417	32538885	-0.0956213	loss	GE6
UBL3	chr13	29764371	29850617	-0.0954314	loss	GE6
PDS5B	chr13	32586452	32778019	-0.0952517	loss	GE6
SPART	chr13	36301638	36370180	-0.0951747	loss	GE6
POMP	chr13	28659104	28678959	-0.0948681	loss	GE6
ALG5	chr13	36949738	37000261	-0.0948334	loss	GE6
PAN3	chr13	28138506	28295335	-0.0947113	loss	GE6
POLR1D	chr13	27620742	27744237	-0.0946545	loss	GE6
LNX2	chr13	27545913	27620529	-0.0944023	loss	GE6
EXOSC8	chr13	36998816	37009614	-0.0943796	loss	GE6
GTF3A	chr13	27424619	27435823	-0.0943789	loss	GE6
MTIF3	chr13	27435643	27450591	-0.0943164	loss	GE6
RPL21	chr13	27251309	27256691	-0.0941075	loss	GE6
SUPT20H	chr13	37009312	37059713	-0.0938922	loss	GE6
USP12	chr13	27066156	27171811	-0.0938508	loss	GE6
UFM1	chr13	38349849	38363619	-0.0935159	loss	GE6
NHLRC3	chr13	39038306	39050109	-0.0930127	loss	GE6
RNF6	chr13	26132115	26222314	-0.0929449	loss	GE6
MRPS31	chr13	40729128	40771190	-0.0925302	loss	GE6
SHISA2	chr13	26044597	26052016	-0.092105	loss	GE6
ELF1	chr13	40931924	41061440	-0.0920213	loss	GE6
WBP4	chr13	41061509	41084006	-0.0913936	loss	GE6
NUP58	chr13	25301556	25349800	-0.0910379	loss	GE6
RGCC	chr13	41457550	41470871	-0.0907872	loss	GE6
MTMR6	chr13	25246201	25288009	-0.0902991	loss	GE6
DGKH	chr13	42040036	42256578	-0.0896443	loss	GE6
RPL34P27	chr13	24988577	24988925	-0.0893523	loss	GE6
AKAP11	chr13	42272152	42323261	-0.088654	loss	GE6
PARP4	chr13	24420931	24512778	-0.0879698	loss	GE6
EPSTI1	chr13	42886388	42992271	-0.0878167	loss	GE6
SPATA13	chr13	23979805	24307074	-0.0869502	loss	GE6
DNAJC15	chr13	43023203	43114213	-0.0866573	loss	GE6
MICU2	chr13	21492691	21604181	-0.0857047	loss	GE6
TSC22D1	chr13	44432143	44577147	-0.0856034	loss	GE6
GPALPP1	chr13	44989529	45037669	-0.0851867	loss	GE6
ZDHHC20	chr13	21372573	21459370	-0.0846422	loss	GE6
GTF2F2	chr13	45120510	45284893	-0.0845536	loss	GE6
TPT1	chr13	45333471	45341284	-0.0842228	loss	GE6
COG3	chr13	45464898	45536701	-0.0835543	loss	GE6
MRPL57	chr13	21176658	21179084	-0.0834604	loss	GE6
ZC3H13	chr13	45954465	46052759	-0.0829207	loss	GE6
SAP18	chr13	21140514	21149084	-0.0821668	loss	GE6
LCP1	chr13	46125920	46211871	-0.0816299	loss	GE6
LATS2	chr13	20973036	21061586	-0.0810724	loss	GE6
CRYL1	chr13	20403666	20525873	-0.0799926	loss	GE6
COPS6	chr7	100088969	100092187	0.234439511654019	gain	GE7
MCM7	chr7	100092728	100101940	0.234115400814658	gain	GE7
TAF6	chr7	100107070	100119841	0.233874910581144	gain	GE7
ZNF3	chr7	100064033	100082548	0.233712155548358	gain	GE7
LAMTOR4	chr7	100148907	100155944	0.233695698470236	gain	GE7
PILRB	chr7	100352176	100367733	0.233326227507534	gain	GE7
MEPCE	chr7	100428790	100434118	0.232934174517627	gain	GE7
ZKSCAN1	chr7	100015572	100041689	0.23286009407217	gain	GE7
PPP1R35	chr7	100435282	100436497	0.232664208534814	gain	GE7
GNB2	chr7	100673567	100679174	0.232550197702168	gain	GE7
TSC22D4	chr7	100463359	100479232	0.232333339330126	gain	GE7
MOSPD3	chr7	100612102	100615384	0.23232631776293	gain	GE7
GIGYF1	chr7	100679507	100694037	0.232210613530571	gain	GE7
LRCH4	chr7	100574011	100586129	0.232132611170071	gain	GE7
POP7	chr7	100706121	100707486	0.232043634665972	gain	GE7
AZGP1	chr7	99966720	99976042	0.231917200513602	gain	GE7
EPHB4	chr7	100802565	100827523	0.2314401119269	gain	GE7
TRIM4	chr7	99876958	99919600	0.230831128752987	gain	GE7
SLC12A9	chr7	100826820	100867010	0.23081871974685	gain	GE7
TRIP6	chr7	100867387	100873454	0.230162056783471	gain	GE7
PDAP1	chr7	99392048	99408597	0.229838200223971	gain	GE7
BUD31	chr7	99408641	99419616	0.229787390658017	gain	GE7
CYP3A5	chr7	99648194	99679998	0.229763119680724	gain	GE7
ARPC1B	chr7	99374249	99394816	0.229312122874446	gain	GE7
SRRT	chr7	100875103	100888664	0.229311432150905	gain	GE7
CPSF4	chr7	99438922	99457373	0.229024953330328	gain	GE7
ZNF655	chr7	99558406	99576453	0.228742353639557	gain	GE7
ACHE	chr7	100889994	100896974	0.228538118817482	gain	GE7
ATP5MF	chr7	99448475	99466186	0.228377622655867	gain	GE7
ZNF394	chr7	99473877	99504857	0.227883167549855	gain	GE7
ARPC1A	chr7	99325898	99366262	0.227518631513109	gain	GE7
MUC3A	chr7	100949534	100968347	0.227517676174818	gain	GE7
TRIM56	chr7	101085481	101097967	0.226322619945796	gain	GE7
AP1S1	chr7	101154456	101161596	0.225339329671829	gain	GE7
SMURF1	chr7	99027438	99144100	0.225194266211127	gain	GE7
PLOD3	chr7	101205977	101218420	0.224492886211284	gain	GE7
ZNHIT1	chr7	101218165	101224190	0.223767327932651	gain	GE7
RPS3AP26	chr7	98385801	98386584	0.222400061041604	gain	GE7
FIS1	chr7	101239458	101252316	0.222372542210203	gain	GE7
BAIAP2L1	chr7	98291650	98401090	0.220491917657586	gain	GE7
IFT22	chr7	101310914	101321823	0.220421900904794	gain	GE7
BRI3	chr7	98252379	98310441	0.21857481787683	gain	GE7
CUX1	chr7	101815904	102283958	0.21833291481721	gain	GE7
TECPR1	chr7	98214624	98252232	0.216337697785127	gain	GE7
PRKRIP1	chr7	102363872	102426676	0.215908455812097	gain	GE7
ASNS	chr7	97851677	97872542	0.214353851930158	gain	GE7
ORAI2	chr7	102433106	102456825	0.21399132472278	gain	GE7
POLR2J	chr7	102473118	102478907	0.212153157015211	gain	GE7
SDHAF3	chr7	97117698	97181763	0.211890516667307	gain	GE7
POLR2J3	chr7	102537918	102572653	0.209303190303078	gain	GE7
LARP4B	chr10	806914	931705	-0.0728339	loss	GE7
GTPBP4	chr10	988434	1019932	-0.0727245	loss	GE7
IDI1	chr10	1039152	1049170	-0.0726548	loss	GE7
ZMYND11	chr10	134465	254637	-0.07255	loss	GE7
PFKP	chr10	3066333	3137718	-0.0723643	loss	GE7
CELF2	chr10	10798397	11336675	-0.0718155	loss	GE7
PTER	chr10	16436943	16513745	-0.0718028	loss	GE7
PITRM1	chr10	3137728	3172841	-0.0717157	loss	GE7
RPP38	chr10	15097180	15139818	-0.0716905	loss	GE7
USP6NL	chr10	11453946	11611754	-0.0716529	loss	GE7
FAM107B	chr10	14518557	14774897	-0.0716484	loss	GE7
KLF6	chr10	3775996	3785281	-0.0716178	loss	GE7
VIM	chr10	17228241	17237593	-0.0716128	loss	GE7
RSU1	chr10	16590611	16817463	-0.0715305	loss	GE7
PRPF18	chr10	13586939	13630859	-0.0714158	loss	GE7
SFTA1P	chr10	10784437	10795047	-0.0712477	loss	GE7
SEPHS1	chr10	13317428	13348298	-0.0711863	loss	GE7
MRC1	chr10	17809348	17911164	-0.0711699	loss	GE7
UPF2	chr10	11920022	12043170	-0.0711404	loss	GE7
NUDT5	chr10	12165330	12196144	-0.0708523	loss	GE7
CDC123	chr10	12195965	12250589	-0.0708169	loss	GE7
ARL5B	chr10	18659431	18681639	-0.0707406	loss	GE7
PHYH	chr10	13277796	13302412	-0.0705946	loss	GE7
DHTKD1	chr10	12068954	12123221	-0.0705838	loss	GE7
OPTN	chr10	13099449	13138308	-0.0705695	loss	GE7
PLXDC2	chr10	19816239	20289856	-0.0705635	loss	GE7
AKR1C1	chr10	4963253	4983283	-0.0705471	loss	GE7
CAMK1D	chr10	12349482	12835545	-0.0705048	loss	GE7
NEBL	chr10	20779973	21174187	-0.0704087	loss	GE7
MLLT10	chr10	21524646	21743630	-0.0703276	loss	GE7
TAF3	chr10	7818505	8016631	-0.0703245	loss	GE7
MSRB2	chr10	23095579	23122013	-0.0701931	loss	GE7
OTUD1	chr10	23439458	23442390	-0.0700912	loss	GE7
PIP4K2A	chr10	22534854	22714578	-0.0700288	loss	GE7
KIAA1217	chr10	23694746	24547848	-0.069979	loss	GE7
AKR1C2	chr10	4987400	5018031	-0.0699436	loss	GE7
AKR1C3	chr10	5035354	5107686	-0.0698903	loss	GE7
ARHGAP21	chr10	24583609	24723887	-0.0698608	loss	GE7
DNAJC1	chr10	21756548	22003769	-0.0698444	loss	GE7
BMI1	chr10	22321099	22331484	-0.0696642	loss	GE7
APBB1IP	chr10	26438341	26567803	-0.0695039	loss	GE7
NET1	chr10	5412557	5459056	-0.0694149	loss	GE7
ATP5F1C	chr10	7788147	7807815	-0.0694073	loss	GE7
COMMD3	chr10	22316386	22320306	-0.0693233	loss	GE7
KIN	chr10	7750962	7787993	-0.0691513	loss	GE7
GDI2	chr10	5765223	5842132	-0.0691128	loss	GE7
RBM17	chr10	6089034	6117457	-0.0689989	loss	GE7
CALML3	chr10	5524961	5526771	-0.06899	loss	GE7
PFKFB3	chr10	6144934	6254644	-0.0689035	loss	GE7
ABI1	chr10	26746593	26861087	-0.0685816	loss	GE7
CAV1	chr7	116525001	116561184	0.147690715473116	gain	GE8
CAV2	chr7	116287380	116508541	0.14754824888389	gain	GE8
MET	chr7	116672196	116798386	0.147473078664734	gain	GE8
TES	chr7	116210506	116258783	0.147331003127997	gain	GE8
MDFIC	chr7	114922154	115019202	0.146864757298715	gain	GE8
CAPZA2	chr7	116811070	116922049	0.146576387160027	gain	GE8
SMIM30	chr7	113116718	113118560	0.146217145287408	gain	GE8
IFRD1	chr7	112422968	112481017	0.145661201502557	gain	GE8
ST7	chr7	116953238	117230103	0.14547927457391	gain	GE8
ZNF277	chr7	112206695	112343934	0.144917645842222	gain	GE8
LSM8	chr7	118184144	118204035	0.144490288690229	gain	GE8
DNAJB9	chr7	108569867	108574850	0.143840914593283	gain	GE8
TSPAN12	chr7	120787320	120858402	0.143580239353113	gain	GE8
THAP5	chr7	108554543	108569750	0.143074293165431	gain	GE8
ING3	chr7	120950763	120977216	0.142452	gain	GE8
PNPLA8	chr7	108470417	108569666	0.14193737368195	gain	GE8
FAM3C	chr7	121348878	121396364	0.141893677163254	gain	GE8
DLD	chr7	107891162	107931730	0.141347284151582	gain	GE8
BCAP29	chr7	107579977	107629170	0.140907455212404	gain	GE8
CADPS2	chr7	122318411	122886759	0.139894949790608	gain	GE8
COG5	chr7	107201555	107564514	0.139808933130231	gain	GE8
HBP1	chr7	107168961	107202522	0.139339289137591	gain	GE8
CCDC71L	chr7	106654360	106661158	0.139041890677075	gain	GE8
NAMPT	chr7	106248298	106286326	0.138610638884014	gain	GE8
NDUFA5	chr7	123536997	123557904	0.138210126394738	gain	GE8
SYPL1	chr7	106090503	106112576	0.137840858461544	gain	GE8
SRPK2	chr7	105110704	105399308	0.136799720662114	gain	GE8
WASL	chr7	123681943	123749003	0.136307153356465	gain	GE8
KMT2E	chr7	105014190	105115019	0.136198133131167	gain	GE8
PSMC2	chr7	103344254	103369395	0.135855813639578	gain	GE8
DNAJC2	chr7	103312289	103344830	0.13550057198644	gain	GE8
PMPCB	chr7	103297435	103329511	0.135179649128701	gain	GE8
ARMC10	chr7	103074881	103099759	0.134679461672958	gain	GE8
POLR2J3	chr7	102537918	102572653	0.134292603681626	gain	GE8
POLR2J	chr7	102473118	102478907	0.133999663879706	gain	GE8
ZNF800	chr7	127346790	127431924	0.133651520236581	gain	GE8
ORAI2	chr7	102433106	102456825	0.133171204165546	gain	GE8
PRKRIP1	chr7	102363872	102426676	0.132550148795147	gain	GE8
S100A14	chr1	153614255	153616986	0.132181511817345	gain	GE8
CUX1	chr7	101815904	102283958	0.132036150504764	gain	GE8
S100A13	chr1	153618787	153631360	0.132031123500514	gain	GE8
S100A16	chr1	153606886	153613145	0.131697608888223	gain	GE8
ARF5	chr7	127588386	127591700	0.131280371739945	gain	GE8
CHTOP	chr1	153633982	153646306	0.131205230772675	gain	GE8
IFT22	chr7	101310914	101321823	0.131128411433054	gain	GE8
SNAPIN	chr1	153658703	153661852	0.130751580215704	gain	GE8
S100A2	chr1	153561108	153567890	0.130488480371073	gain	GE8
FIS1	chr7	101239458	101252316	0.130348088903817	gain	GE8
ILF2	chr1	153661788	153671028	0.130221157316285	gain	GE8
INTS3	chr1	153728050	153774808	0.129590268017667	gain	GE8
NR1D2	chr3	23945286	23980617	-0.0954392	loss	GE8
RPL15	chr3	23916591	23924374	-0.0954295	loss	GE8
NGLY1	chr3	25718944	25790039	-0.0953153	loss	GE8
TOP2B	chr3	25597905	25664907	-0.0952979	loss	GE8
SLC4A7	chr3	27372721	27484420	-0.0951534	loss	GE8
UBE2E1	chr3	23805955	23891640	-0.0951399	loss	GE8
CMC1	chr3	28241584	28325142	-0.0951232	loss	GE8
AZI2	chr3	28315003	28349050	-0.0951214	loss	GE8
RBMS3	chr3	28574791	30010391	-0.0949491	loss	GE8
TGFBR2	chr3	30606601	30694142	-0.0948087	loss	GE8
UBE2E2	chr3	23203020	23591794	-0.0946533	loss	GE8
STT3B	chr3	31532638	31637616	-0.0946287	loss	GE8
CMTM7	chr3	32391698	32483067	-0.0944262	loss	GE8
CMTM8	chr3	32238679	32370321	-0.0944252	loss	GE8
RAB5A	chr3	19947097	19985175	-0.0943084	loss	GE8
GPD1L	chr3	32105689	32168709	-0.0942738	loss	GE8
CMTM6	chr3	32481312	32502852	-0.0941955	loss	GE8
SATB1	chr3	18345377	18445588	-0.0941218	loss	GE8
DYNC1LI1	chr3	32525974	32570858	-0.0941207	loss	GE8
CNOT10	chr3	32685145	32773875	-0.0936895	loss	GE8
TBC1D5	chr3	17157162	18444817	-0.0932787	loss	GE8
GLB1	chr3	32996609	33097202	-0.0932706	loss	GE8
CRTAP	chr3	33114014	33147773	-0.092812	loss	GE8
RFTN1	chr3	16313574	16514026	-0.092724	loss	GE8
UBP1	chr3	33388336	33441371	-0.0926268	loss	GE8
CLASP2	chr3	33496245	33718356	-0.0924111	loss	GE8
DPH3	chr3	16257061	16264969	-0.0922804	loss	GE8
ANKRD28	chr3	15667236	15859771	-0.0918721	loss	GE8
PDCD6IP	chr3	33798571	33869707	-0.0918334	loss	GE8
EPM2AIP1	chr3	36985043	36993131	-0.0914124	loss	GE8
EAF1	chr3	15427598	15450635	-0.0912927	loss	GE8
LRRFIP2	chr3	37052626	37183689	-0.0910806	loss	GE8
USP12	chr13	27066156	27171811	-0.0909409	loss	GE8
RPL21	chr13	27251309	27256691	-0.0908861	loss	GE8
GTF3A	chr13	27424619	27435823	-0.0907646	loss	GE8
GOLGA4	chr3	37243177	37366751	-0.0905893	loss	GE8
SH3BP5	chr3	15254353	15341368	-0.0905387	loss	GE8
CTDSPL	chr3	37861880	37984469	-0.0905278	loss	GE8
MTIF3	chr13	27435643	27450591	-0.0904266	loss	GE8
LNX2	chr13	27545913	27620529	-0.0902783	loss	GE8
POLR1D	chr13	27620742	27744237	-0.0899955	loss	GE8
ACAA1	chr3	38103129	38137242	-0.0899918	loss	GE8
MYD88	chr3	38138478	38143022	-0.0898868	loss	GE8
CAPN7	chr3	15206152	15252916	-0.0897506	loss	GE8
OXSR1	chr3	38165089	38255484	-0.089599	loss	GE8
RNF6	chr13	26132115	26222314	-0.0895658	loss	GE8
PAN3	chr13	28138506	28295335	-0.0894686	loss	GE8
WDR48	chr3	39052013	39096671	-0.0894471	loss	GE8
CSRNP1	chr3	39141855	39154562	-0.0894429	loss	GE8
MRPS25	chr3	15042460	15065317	-0.0891311	loss	GE8
S100A16	chr1	153606886	153613145	0.183385234783184	gain	GE9
S100A2	chr1	153561108	153567890	0.183190398083736	gain	GE9
S100A4	chr1	153543613	153550136	0.183096642402111	gain	GE9
S100A14	chr1	153614255	153616986	0.182422955647545	gain	GE9
S100A6	chr1	153534599	153536244	0.181845930826044	gain	GE9
S100A13	chr1	153618787	153631360	0.180585108745662	gain	GE9
S100A7	chr1	153457744	153460651	0.178741671795966	gain	GE9
CHTOP	chr1	153633982	153646306	0.178571944815825	gain	GE9
SNAPIN	chr1	153658703	153661852	0.176902739485864	gain	GE9
S100A8	chr1	153390032	153391073	0.175907950494927	gain	GE9
ILF2	chr1	153661788	153671028	0.17526084642271	gain	GE9
INTS3	chr1	153728050	153774808	0.173428267538185	gain	GE9
S100A9	chr1	153357854	153361023	0.173307276851822	gain	GE9
SLC27A3	chr1	153774354	153780157	0.171540025807255	gain	GE9
GATAD2B	chr1	153789030	153923360	0.169731611473715	gain	GE9
SPRR2A	chr1	153056120	153057512	0.169699690797853	gain	GE9
DUSP4	chr8	29333064	29350684	0.168992749718997	gain	GE9
SARAF	chr8	30063003	30083208	0.168508265751744	gain	GE9
KIF13B	chr8	29067278	29263124	0.168235393243988	gain	GE9
DENND4B	chr1	153929501	153946718	0.168059711193774	gain	GE9
LEPROTL1	chr8	30095408	30177208	0.167905880783541	gain	GE9
HMBOX1	chr8	28890395	29064764	0.167546810502356	gain	GE9
RPS15AP24	chr8	30117384	30117779	0.167119786312814	gain	GE9
ZNF395	chr8	28345590	28402701	0.166917286742412	gain	GE9
DCTN6	chr8	30156319	30183639	0.166427708779424	gain	GE9
CRTC2	chr1	153947669	153958615	0.166206115113662	gain	GE9
CCDC25	chr8	27733316	27772653	0.166205534347157	gain	GE9
SPRR2D	chr1	153039732	153041931	0.165948705821603	gain	GE9
CLU	chr8	27596917	27614700	0.165440663154265	gain	GE9
RBPMS	chr8	30384511	30572256	0.165267439523876	gain	GE9
SLC39A1	chr1	153959099	153968184	0.16461260913643	gain	GE9
GTF2E2	chr8	30578318	30658236	0.16426077816461	gain	GE9
PTK2B	chr8	27311482	27459391	0.163692848199374	gain	GE9
GSR	chr8	30678066	30727846	0.163130073191048	gain	GE9
JTB	chr1	153974269	153977674	0.162916281931318	gain	GE9
SPRR1B	chr1	153031203	153032900	0.162128114410596	gain	GE9
DPYSL2	chr8	26514031	26658178	0.161969250772621	gain	GE9
PPP2CB	chr8	30774457	30814314	0.161938062377204	gain	GE9
RAB13	chr1	153981617	153986358	0.160885343676719	gain	GE9
BNIP3L	chr8	26383054	26505636	0.160881474487399	gain	GE9
ZNF703	chr8	37695782	37700019	0.160614801165234	gain	GE9
PPP2R2A	chr8	26291508	26372680	0.159921907344438	gain	GE9
ERLIN2	chr8	37736601	37758422	0.159424032032679	gain	GE9
RPS27	chr1	153990762	153992155	0.158771215417077	gain	GE9
KCTD9	chr8	25427847	25458476	0.158571076526252	gain	GE9
SPRR3	chr1	153001747	153003856	0.158537231478076	gain	GE9
TPM3	chr1	154155304	154194648	0.158402299970551	gain	GE9
PLPBP	chr8	37762595	37779768	0.158370754274675	gain	GE9
C1orf43	chr1	154206696	154220637	0.157885258323919	gain	GE9
DOCK5	chr8	25184689	25418082	0.157234139207753	gain	GE9
RPL13A	chr19	49487554	49492308	-0.135868	loss	GE9
RPS11	chr19	49496365	49499708	-0.135568	loss	GE9
PIH1D1	chr19	49446298	49453497	-0.135102	loss	GE9
FCGRT	chr19	49506816	49526428	-0.134834	loss	GE9
CD37	chr19	49335171	49343335	-0.13436	loss	GE9
NOSIP	chr19	49555468	49590262	-0.134078	loss	GE9
RRAS	chr19	49635292	49640143	-0.133596	loss	GE9
SCAF1	chr19	49642209	49658642	-0.133217	loss	GE9
TRPM4	chr19	49157741	49211836	-0.133105	loss	GE9
IRF3	chr19	49659569	49665875	-0.132856	loss	GE9
BCL2L12	chr19	49665142	49673916	-0.132481	loss	GE9
PRMT1	chr19	49675786	49689029	-0.132054	loss	GE9
SNRNP70	chr19	49085419	49108605	-0.132047	loss	GE9
AP2A1	chr19	49766968	49807113	-0.131706	loss	GE9
MED25	chr19	49818279	49840383	-0.13133	loss	GE9
PTOV1	chr19	49850735	49860744	-0.130967	loss	GE9
RUVBL2	chr19	48993562	49015970	-0.130816	loss	GE9
PNKP	chr19	49859882	49878351	-0.130563	loss	GE9
AKT1S1	chr19	49869033	49878459	-0.1301	loss	GE9
GYS1	chr19	48968130	48993310	-0.129766	loss	GE9
TBC1D17	chr19	49877425	49888750	-0.129693	loss	GE9
NUP62	chr19	49906825	49929763	-0.129146	loss	GE9
ATF5	chr19	49928702	49933935	-0.128758	loss	GE9
FTL	chr19	48965309	48966879	-0.128624	loss	GE9
VRK3	chr19	49976468	50025946	-0.128472	loss	GE9
MYH14	chr19	50188186	50310542	-0.127984	loss	GE9
RPL15	chr3	23916591	23924374	-0.127926	loss	GE9
NR1D2	chr3	23945286	23980617	-0.127693	loss	GE9
UBE2E1	chr3	23805955	23891640	-0.127579	loss	GE9
NR1H2	chr19	50329653	50383388	-0.127505	loss	GE9
TOP2B	chr3	25597905	25664907	-0.127502	loss	GE9
BAX	chr19	48954815	48961798	-0.127406	loss	GE9
NGLY1	chr3	25718944	25790039	-0.127302	loss	GE9
UBE2E2	chr3	23203020	23591794	-0.127218	loss	GE9
NAPSB	chr19	50333796	50344767	-0.127023	loss	GE9
SLC4A7	chr3	27372721	27484420	-0.126936	loss	GE9
RAB5A	chr3	19947097	19985175	-0.126811	loss	GE9
CMC1	chr3	28241584	28325142	-0.126622	loss	GE9
NAPSA	chr19	50358477	50365830	-0.126616	loss	GE9
AZI2	chr3	28315003	28349050	-0.12647	loss	GE9
SATB1	chr3	18345377	18445588	-0.126465	loss	GE9
EMC10	chr19	50476400	50490871	-0.126189	loss	GE9
RBMS3	chr3	28574791	30010391	-0.126186	loss	GE9
NUCB1	chr19	48900312	48923372	-0.126159	loss	GE9
TBC1D5	chr3	17157162	18444817	-0.12598	loss	GE9
TGFBR2	chr3	30606601	30694142	-0.125927	loss	GE9
JOSD2	chr19	50505998	50511220	-0.125906	loss	GE9
STT3B	chr3	31532638	31637616	-0.125642	loss	GE9
RFTN1	chr3	16313574	16514026	-0.1255	loss	GE9
C19orf48	chr19	50797704	50804929	-0.125425	loss	GE9
RPS6	chr9	19375715	19380236	0.257115294413524	gain	GE10
KLHL9	chr9	21329665	21335404	0.256937872199558	gain	GE10
MLLT3	chr9	20341669	20622518	0.256856510745663	gain	GE10
MTAP	chr9	21802636	21937651	0.256819819672317	gain	GE10
HACD4	chr9	20999509	21031640	0.256786079121341	gain	GE10
DENND4C	chr9	19230435	19373545	0.256754987610601	gain	GE10
CDKN2A	chr9	21967753	21995301	0.256508065907179	gain	GE10
AL161909.1	chr9	19200335	19201046	0.256407896397934	gain	GE10
PLIN2	chr9	19108375	19149290	0.256377252377362	gain	GE10
RRAGA	chr9	19049427	19051025	0.256017063335862	gain	GE10
PSIP1	chr9	15464066	15510995	0.255237426527766	gain	GE10
CDKN2B	chr9	22002903	22009305	0.254513263437583	gain	GE10
SNAPC3	chr9	15422704	15465953	0.253560864794171	gain	GE10
MOB3B	chr9	27325209	27529814	0.252176167652592	gain	GE10
TTC39B	chr9	15163622	15307360	0.251848862525638	gain	GE10
ZDHHC21	chr9	14611071	14693471	0.250195496974482	gain	GE10
C9orf72	chr9	27535640	27573866	0.25007902542877	gain	GE10
NFIB	chr9	14081843	14398983	0.248438654968401	gain	GE10
ACO1	chr9	32384603	32454769	0.248108081198196	gain	GE10
TOPORS	chr9	32540544	32552586	0.246006244594296	gain	GE10
LURAP1L	chr9	12775020	12823060	0.245980045799868	gain	GE10
NDUFB6	chr9	32553001	32573184	0.243817744568273	gain	GE10
DMAC1	chr9	7796500	7888380	0.243199423830877	gain	GE10
APTX	chr9	32886601	33025130	0.240968047351579	gain	GE10
KIAA2026	chr9	5881596	6008482	0.239992673672016	gain	GE10
DNAJA1	chr9	33025273	33039907	0.23830101939918	gain	GE10
PLGRKT	chr9	5357971	5437925	0.23667953648434	gain	GE10
SMU1	chr9	33041765	33076674	0.23529539629433	gain	GE10
AK3	chr9	4709556	4742043	0.233673959575678	gain	GE10
B4GALT1	chr9	33104082	33167356	0.232387508349852	gain	GE10
CDC37L1	chr9	4679559	4708399	0.229747613908663	gain	GE10
BAG1	chr9	33247820	33264720	0.22967863213919	gain	GE10
GLIS3	chr9	3824127	4348392	0.226426658121081	gain	GE10
CHMP5	chr9	33264879	33282070	0.22623010005629	gain	GE10
PUM3	chr9	2720469	2844095	0.223226492014283	gain	GE10
NFX1	chr9	33290512	33371157	0.222278812528043	gain	GE10
SMARCA2	chr9	1980290	2193624	0.220062376106594	gain	GE10
AQP3	chr9	33441156	33447596	0.218340819467751	gain	GE10
KANK1	chr9	470291	746106	0.217044512838129	gain	GE10
UBE2R2	chr9	33817160	33920399	0.214599588246204	gain	GE10
DOCK8	chr9	214854	465259	0.213921869671844	gain	GE10
CBWD1	chr9	121038	179147	0.211329672067932	gain	GE10
UBAP2	chr9	33921693	34048949	0.210745986220637	gain	GE10
WASHC1	chr9	14475	73865	0.208973121905022	gain	GE10
DCAF12	chr9	34086387	34127399	0.206977411838698	gain	GE10
UBAP1	chr9	34179005	34252523	0.203305232430711	gain	GE10
C9orf24	chr9	34379019	34397810	0.199571266109636	gain	GE10
RPP25L	chr9	34610486	34612104	0.196074654007799	gain	GE10
DCTN3	chr9	34613545	34620523	0.192501499352741	gain	GE10
SIGMAR1	chr9	34634722	34637809	0.18829454778893	gain	GE10
EPS8L2	chr11	694438	727727	-0.128144	loss	GE10
RPLP2	chr11	809965	812880	-0.128012	loss	GE10
TALDO1	chr11	747415	765012	-0.127982	loss	GE10
IRF7	chr11	612553	615983	-0.127582	loss	GE10
PNPLA2	chr11	818914	825573	-0.12727	loss	GE10
RASSF7	chr11	560404	564025	-0.126866	loss	GE10
CRACR2B	chr11	826144	831991	-0.126485	loss	GE10
HRAS	chr11	532242	537287	-0.126276	loss	GE10
CD151	chr11	832887	839831	-0.12574	loss	GE10
RNH1	chr11	494512	507300	-0.125573	loss	GE10
SIGIRR	chr11	405716	417455	-0.125146	loss	GE10
POLR2L	chr11	837356	842529	-0.125019	loss	GE10
PKP3	chr11	392614	404908	-0.124689	loss	GE10
IFITM3	chr11	319676	327537	-0.124328	loss	GE10
TSPAN4	chr11	842812	867116	-0.124176	loss	GE10
IFITM1	chr11	313506	315272	-0.123775	loss	GE10
CHID1	chr11	867859	915058	-0.123375	loss	GE10
IFITM2	chr11	307631	315272	-0.123232	loss	GE10
AP2A2	chr11	924894	1012245	-0.122752	loss	GE10
MUC5AC	chr11	1157953	1201138	-0.122144	loss	GE10
PGGHG	chr11	289126	296107	-0.122131	loss	GE10
MUC5B	chr11	1223066	1262172	-0.121493	loss	GE10
BET1L	chr11	167784	207428	-0.121481	loss	GE10
RIC8A	chr11	207511	215113	-0.121366	loss	GE10
PSMD13	chr11	236966	252984	-0.121352	loss	GE10
TOLLIP	chr11	1274371	1309654	-0.120864	loss	GE10
MOB2	chr11	1469457	1501247	-0.119833	loss	GE10
DUSP8	chr11	1554051	1572271	-0.11928	loss	GE10
CTSD	chr11	1752755	1764573	-0.118835	loss	GE10
SYT8	chr11	1828307	1837521	-0.118237	loss	GE10
LSP1	chr11	1853084	1892267	-0.117621	loss	GE10
MRPL23	chr11	1947278	1984522	-0.11669	loss	GE10
IGF2	chr11	2129112	2141238	-0.11587	loss	GE10
CD81	chr11	2376177	2397397	-0.115078	loss	GE10
TSSC4	chr11	2400488	2403878	-0.114236	loss	GE10
KCNQ1OT1	chr11	2608328	2699994	-0.113499	loss	GE10
CDKN1C	chr11	2883213	2885773	-0.113144	loss	GE10
SLC22A18	chr11	2899721	2925246	-0.112857	loss	GE10
NAP1L4	chr11	2944431	2992377	-0.112656	loss	GE10
PHLDA2	chr11	2928273	2929420	-0.112586	loss	GE10
NUP98	chr11	3671083	3797792	-0.112385	loss	GE10
RHOG	chr11	3826978	3840959	-0.112055	loss	GE10
STIM1	chr11	3854527	4093210	-0.111218	loss	GE10
RRM1	chr11	4094707	4138932	-0.110289	loss	GE10
HBB	chr11	5225464	5229395	-0.109785	loss	GE10
TRIM22	chr11	5689697	5737089	-0.109268	loss	GE10
ARFIP2	chr11	6474683	6481479	-0.108643	loss	GE10
TIMM10B	chr11	6481501	6484681	-0.108099	loss	GE10
ILK	chr11	6603708	6610874	-0.107218	loss	GE10
TAF10	chr11	6606294	6612539	-0.106697	loss	GE10
ASH1L	chr1	155335268	155562807	0.404904269805227	gain	GE11
RUSC1	chr1	155320894	155331114	0.404769920776996	gain	GE11
YY1AP1	chr1	155659443	155689000	0.40458821973145	gain	GE11
FDPS	chr1	155308748	155320666	0.404263528491714	gain	GE11
DAP3	chr1	155687960	155739010	0.404176738798704	gain	GE11
GON4L	chr1	155749662	155859400	0.403961546010945	gain	GE11
RIT1	chr1	155897808	155911404	0.403737072107922	gain	GE11
ARHGEF2	chr1	155946851	156007070	0.403559496359006	gain	GE11
CLK2	chr1	155262868	155278491	0.403537601507128	gain	GE11
KHDC4	chr1	155913045	155934413	0.403401658997901	gain	GE11
SCAMP3	chr1	155255979	155262430	0.402894136484664	gain	GE11
SSR2	chr1	156009048	156020951	0.402678832737587	gain	GE11
FAM189B	chr1	155247205	155255483	0.402224134093217	gain	GE11
MTX1	chr1	155208699	155213824	0.401354946632018	gain	GE11
UBQLN4	chr1	156035299	156053798	0.401281796952526	gain	GE11
LAMTOR2	chr1	156054782	156058506	0.400671057462108	gain	GE11
MUC1	chr1	155185824	155192916	0.400401205621561	gain	GE11
RAB25	chr1	156061160	156070504	0.400025262448165	gain	GE11
MEX3A	chr1	156072013	156082465	0.398716309672323	gain	GE11
KRTCAP2	chr1	155169408	155173475	0.398061022767405	gain	GE11
LMNA	chr1	156082573	156140089	0.39694184673118	gain	GE11
DPM3	chr1	155139891	155140595	0.396381654539999	gain	GE11
SLC50A1	chr1	155135344	155138857	0.395251734824908	gain	GE11
SEMA4A	chr1	156147366	156177752	0.39449078005571	gain	GE11
EFNA1	chr1	155127876	155134899	0.394273171725449	gain	GE11
EFNA4	chr1	155063737	155069553	0.392992850494854	gain	GE11
SLC25A44	chr1	156193932	156212796	0.392813819391129	gain	GE11
ADAM15	chr1	155050566	155062775	0.391778471884935	gain	GE11
PMF1	chr1	156212993	156240042	0.391180344501748	gain	GE11
ZBTB7B	chr1	155002630	155018522	0.390353640196134	gain	GE11
PMVK	chr1	154924740	154936719	0.389854356381051	gain	GE11
PBXIP1	chr1	154944076	154956123	0.389837047288302	gain	GE11
ADAR	chr1	154582057	154628013	0.389299282675049	gain	GE11
PYGO2	chr1	154957026	154963853	0.389246335584857	gain	GE11
SMG5	chr1	156249224	156282825	0.389178168575738	gain	GE11
FLAD1	chr1	154983338	154993111	0.388856529396492	gain	GE11
SHC1	chr1	154962298	154974395	0.388726160440669	gain	GE11
CKS1B	chr1	154974653	154979251	0.388674855500767	gain	GE11
UBE2Q1	chr1	154548577	154559028	0.387665926801217	gain	GE11
GLMP	chr1	156290089	156295689	0.387134812359826	gain	GE11
CCT3	chr1	156308968	156367873	0.385184939342251	gain	GE11
SHE	chr1	154469772	154502412	0.385088310774736	gain	GE11
MEF2D	chr1	156463727	156500779	0.382738872934212	gain	GE11
IL6R	chr1	154405193	154469450	0.382550004091112	gain	GE11
NAXE	chr1	156591762	156594299	0.380980220740416	gain	GE11
HAX1	chr1	154272589	154275875	0.380169217621658	gain	GE11
GPATCH4	chr1	156594487	156601496	0.378976499828393	gain	GE11
UBAP2L	chr1	154220179	154271510	0.377851006440382	gain	GE11
CRABP2	chr1	156699606	156705816	0.377244048242922	gain	GE11
C1orf43	chr1	154206696	154220637	0.375314798706444	gain	GE11
RPL21	chr13	27251309	27256691	-0.13925	loss	GE11
GTF3A	chr13	27424619	27435823	-0.138568	loss	GE11
USP12	chr13	27066156	27171811	-0.138504	loss	GE11
MTIF3	chr13	27435643	27450591	-0.137761	loss	GE11
RNF6	chr13	26132115	26222314	-0.137124	loss	GE11
LNX2	chr13	27545913	27620529	-0.136996	loss	GE11
POLR1D	chr13	27620742	27744237	-0.136302	loss	GE11
SHISA2	chr13	26044597	26052016	-0.135644	loss	GE11
PAN3	chr13	28138506	28295335	-0.135514	loss	GE11
POMP	chr13	28659104	28678959	-0.134745	loss	GE11
UBL3	chr13	29764371	29850617	-0.134129	loss	GE11
NUP58	chr13	25301556	25349800	-0.133834	loss	GE11
HMGB1	chr13	30456704	30617597	-0.133149	loss	GE11
MTMR6	chr13	25246201	25288009	-0.132438	loss	GE11
ALOX5AP	chr13	30713478	30764426	-0.132077	loss	GE11
HSPH1	chr13	31134973	31162388	-0.130861	loss	GE11
RPL34P27	chr13	24988577	24988925	-0.130662	loss	GE11
FRY	chr13	31846713	32299125	-0.129904	loss	GE11
PARP4	chr13	24420931	24512778	-0.129356	loss	GE11
N4BP2L1	chr13	32400723	32428311	-0.129014	loss	GE11
N4BP2L2	chr13	32432417	32538885	-0.128164	loss	GE11
SPATA13	chr13	23979805	24307074	-0.12805	loss	GE11
PDS5B	chr13	32586452	32778019	-0.127182	loss	GE11
MICU2	chr13	21492691	21604181	-0.126717	loss	GE11
SPART	chr13	36301638	36370180	-0.126217	loss	GE11
ZDHHC20	chr13	21372573	21459370	-0.125355	loss	GE11
ALG5	chr13	36949738	37000261	-0.125297	loss	GE11
EXOSC8	chr13	36998816	37009614	-0.124428	loss	GE11
MRPL57	chr13	21176658	21179084	-0.123941	loss	GE11
SUPT20H	chr13	37009312	37059713	-0.123463	loss	GE11
SAP18	chr13	21140514	21149084	-0.122553	loss	GE11
UFM1	chr13	38349849	38363619	-0.122409	loss	GE11
NHLRC3	chr13	39038306	39050109	-0.121365	loss	GE11
LATS2	chr13	20973036	21061586	-0.120474	loss	GE11
MRPS31	chr13	40729128	40771190	-0.120339	loss	GE11
CRYL1	chr13	20403666	20525873	-0.119097	loss	GE11
ELF1	chr13	40931924	41061440	-0.119055	loss	GE11
ZMYM2	chr13	19958670	20091829	-0.117663	loss	GE11
WBP4	chr13	41061509	41084006	-0.117362	loss	GE11
ZMYM5	chr13	19823482	19863649	-0.116614	loss	GE11
PSPC1	chr13	19674752	19783019	-0.116244	loss	GE11
MPHOSPH8	chr13	19633659	19673441	-0.115789	loss	GE11
RGCC	chr13	41457550	41470871	-0.115488	loss	GE11
DGKH	chr13	42040036	42256578	-0.11328	loss	GE11
RPL15	chr3	23916591	23924374	-0.112854	loss	GE11
UBE2E1	chr3	23805955	23891640	-0.112663	loss	GE11
UBE2E2	chr3	23203020	23591794	-0.11245	loss	GE11
NR1D2	chr3	23945286	23980617	-0.112328	loss	GE11
RAB5A	chr3	19947097	19985175	-0.112187	loss	GE11
SATB1	chr3	18345377	18445588	-0.111951	loss	GE11
BATF	chr14	75522455	75546993	0.193727171041279	gain	GE12
FOS	chr14	75278826	75282230	0.193673599371735	gain	GE12
AC007182.2	chr14	75595805	75596206	0.19358959256998	gain	GE12
ERG28	chr14	75649791	75660876	0.193459952011754	gain	GE12
JDP2	chr14	75427716	75474111	0.193398135272075	gain	GE12
IFT43	chr14	75902136	76084585	0.193236248932075	gain	GE12
GPATCH2L	chr14	76151916	76254342	0.19253048251729	gain	GE12
TMED10	chr14	75131469	75176612	0.192404637561447	gain	GE12
VASH1	chr14	76761468	76783015	0.191792637745574	gain	GE12
IRF2BPL	chr14	77024543	77028708	0.191063243923516	gain	GE12
NEK9	chr14	75079353	75127344	0.190959621092599	gain	GE12
GSTZ1	chr14	77320996	77331597	0.190182653986759	gain	GE12
AHSA1	chr14	77457870	77469472	0.189568689672901	gain	GE12
ACYP1	chr14	75053237	75069483	0.189308177184518	gain	GE12
SPTLC2	chr14	77505997	77616773	0.188400908490074	gain	GE12
MLH3	chr14	75013764	75051532	0.187689640581501	gain	GE12
SLIRP	chr14	77708071	77761104	0.187250510216885	gain	GE12
EIF2B2	chr14	75002921	75012366	0.186514990609443	gain	GE12
SNW1	chr14	77717599	77761207	0.185545687575237	gain	GE12
DLST	chr14	74881891	74903743	0.185408325281527	gain	GE12
YLPM1	chr14	74763316	74859435	0.184165356630156	gain	GE12
GTF2A1	chr14	81175452	81221377	0.183878962778398	gain	GE12
FCF1	chr14	74713144	74738620	0.183047518406468	gain	GE12
SEL1L	chr14	81471547	81533853	0.182492964583675	gain	GE12
ISCA2	chr14	74493756	74497106	0.181664055210811	gain	GE12
GALC	chr14	87837820	87993665	0.181132722575395	gain	GE12
NPC2	chr14	74476192	74494177	0.180269737423946	gain	GE12
ZC3H14	chr14	88562970	88627596	0.179783994230282	gain	GE12
FOXN3	chr14	89124871	89619149	0.179436135613042	gain	GE12
AL357093.2	chr14	89349377	89366081	0.179262143325327	gain	GE12
GPR65	chr14	88005135	88014811	0.179027161901518	gain	GE12
ABCD4	chr14	74285269	74303055	0.178410818348833	gain	GE12
PSMC1	chr14	90256527	90275429	0.177686276474566	gain	GE12
ALDH6A1	chr14	74056847	74084492	0.17659061200299	gain	GE12
NRDE2	chr14	90267860	90331969	0.17649637237944	gain	GE12
CALM1	chr14	90396502	90408268	0.175537901689714	gain	GE12
BBOF1	chr14	74019349	74082863	0.175185684769152	gain	GE12
RPS6KA5	chr14	90847861	91060641	0.17426216653853	gain	GE12
DGLUCY	chr14	91060333	91225632	0.172890905784961	gain	GE12
DNAL1	chr14	73644875	73703732	0.172587566956668	gain	GE12
CCDC88C	chr14	91271323	91417844	0.171441297853082	gain	GE12
CRIP1	chr14	105486317	105488947	0.170062469791203	gain	GE12
CRIP2	chr14	105472962	105480162	0.16976426594352	gain	GE12
C8orf33	chr8	145052465	145066685	0.169584583775228	gain	GE12
PPP4R3A	chr14	91457611	91510554	0.169436990583589	gain	GE12
NUMB	chr14	73275107	73458617	0.169179887799015	gain	GE12
IGHA2	chr14	105583731	105588395	0.169045285287565	gain	GE12
MTA1	chr14	105419820	105470729	0.168249149475546	gain	GE12
IGHG4	chr14	105620506	105626066	0.168182454272784	gain	GE12
TC2N	chr14	91779746	91867536	0.167944822029148	gain	GE12
USP12	chr13	27066156	27171811	-0.0935507	loss	GE12
SRGN	chr10	69088103	69104805	-0.0933858	loss	GE12
POLR1D	chr13	27620742	27744237	-0.0932762	loss	GE12
RPL21	chr13	27251309	27256691	-0.0931477	loss	GE12
PAN3	chr13	28138506	28295335	-0.0930392	loss	GE12
VPS26A	chr10	69123512	69174412	-0.0928594	loss	GE12
LNX2	chr13	27545913	27620529	-0.0928344	loss	GE12
GTF3A	chr13	27424619	27435823	-0.0928212	loss	GE12
RNF6	chr13	26132115	26222314	-0.0927969	loss	GE12
POMP	chr13	28659104	28678959	-0.0927949	loss	GE12
DDX21	chr10	68956170	68985068	-0.0926804	loss	GE12
UBL3	chr13	29764371	29850617	-0.0925401	loss	GE12
MTIF3	chr13	27435643	27450591	-0.0924928	loss	GE12
ALOX5AP	chr13	30713478	30764426	-0.0924192	loss	GE12
HMGB1	chr13	30456704	30617597	-0.0923232	loss	GE12
HK1	chr10	69269984	69401884	-0.0922773	loss	GE12
SHISA2	chr13	26044597	26052016	-0.091971	loss	GE12
TSPAN15	chr10	69451465	69507666	-0.0917993	loss	GE12
SAR1A	chr10	70147289	70170523	-0.0914715	loss	GE12
DDX50	chr10	68901286	68946847	-0.0913067	loss	GE12
HSPH1	chr13	31134973	31162388	-0.0912136	loss	GE12
NUP58	chr13	25301556	25349800	-0.0906142	loss	GE12
FRY	chr13	31846713	32299125	-0.0904886	loss	GE12
CCAR1	chr10	68721012	68792377	-0.0904642	loss	GE12
PPA1	chr10	70202835	70233911	-0.0903846	loss	GE12
MTMR6	chr13	25246201	25288009	-0.0897231	loss	GE12
SLC25A16	chr10	68477998	68527523	-0.0896905	loss	GE12
EIF4EBP2	chr10	70404145	70428618	-0.0893487	loss	GE12
N4BP2L1	chr13	32400723	32428311	-0.0892608	loss	GE12
PRF1	chr10	70597348	70602759	-0.0887953	loss	GE12
RPL34P27	chr13	24988577	24988925	-0.0882224	loss	GE12
N4BP2L2	chr13	32432417	32538885	-0.0880959	loss	GE12
SGPL1	chr10	70815948	70881184	-0.088014	loss	GE12
HNRNPH3	chr10	68331174	68343191	-0.0877736	loss	GE12
PCBD1	chr10	70882280	70888565	-0.0873138	loss	GE12
PARP4	chr13	24420931	24512778	-0.087235	loss	GE12
HERC4	chr10	67921899	68075348	-0.0870692	loss	GE12
PDS5B	chr13	32586452	32778019	-0.0869268	loss	GE12
VSIR	chr10	71747556	71773520	-0.0863419	loss	GE12
SIRT1	chr10	67884656	67918390	-0.0863367	loss	GE12
SPART	chr13	36301638	36370180	-0.0857795	loss	GE12
ZC3H13	chr13	45954465	46052759	-0.085575	loss	GE12
DNAJC12	chr10	67796669	67838188	-0.08553	loss	GE12
LCP1	chr13	46125920	46211871	-0.08552	loss	GE12
PSAP	chr10	71816298	71851325	-0.0853118	loss	GE12
ALG5	chr13	36949738	37000261	-0.0852578	loss	GE12
TPT1	chr13	45333471	45341284	-0.0851059	loss	GE12
COG3	chr13	45464898	45536701	-0.0850092	loss	GE12
ESD	chr13	46771256	46797420	-0.0848075	loss	GE12
EXOSC8	chr13	36998816	37009614	-0.0847791	loss	GE12
S100A13	chr1	153618787	153631360	0.166167118738256	gain	GE13
CHTOP	chr1	153633982	153646306	0.166015912220485	gain	GE13
SNAPIN	chr1	153658703	153661852	0.165930651497964	gain	GE13
ILF2	chr1	153661788	153671028	0.165849583099405	gain	GE13
INTS3	chr1	153728050	153774808	0.165579403657666	gain	GE13
S100A14	chr1	153614255	153616986	0.165499966202298	gain	GE13
SLC27A3	chr1	153774354	153780157	0.165216457497691	gain	GE13
GATAD2B	chr1	153789030	153923360	0.164975806929306	gain	GE13
DENND4B	chr1	153929501	153946718	0.164774685259444	gain	GE13
SLC39A1	chr1	153959099	153968184	0.164646596019989	gain	GE13
CRTC2	chr1	153947669	153958615	0.164622825006676	gain	GE13
JTB	chr1	153974269	153977674	0.164600498172067	gain	GE13
S100A16	chr1	153606886	153613145	0.163914550090872	gain	GE13
RAB13	chr1	153981617	153986358	0.163848000818696	gain	GE13
RPS27	chr1	153990762	153992155	0.162814567525284	gain	GE13
CLDN4	chr7	73799542	73832693	0.162617913579657	gain	GE13
CLDN3	chr7	73768997	73770270	0.162428941595963	gain	GE13
LIMK1	chr7	74082933	74122525	0.161973881411014	gain	GE13
TPM3	chr1	154155304	154194648	0.161728265443387	gain	GE13
S100A2	chr1	153561108	153567890	0.161581475526308	gain	GE13
EIF4H	chr7	74174245	74197101	0.161441862002813	gain	GE13
ABHD11	chr7	73736094	73738867	0.161408192545682	gain	GE13
LAT2	chr7	74199652	74229834	0.160896866762339	gain	GE13
RFC2	chr7	74231499	74254458	0.160774262842619	gain	GE13
C1orf43	chr1	154206696	154220637	0.160680808340126	gain	GE13
GTF2I	chr7	74650231	74760692	0.160534737994503	gain	GE13
BUD23	chr7	73683025	73705161	0.160237116971839	gain	GE13
POM121C	chr7	75416786	75486299	0.16000013535309	gain	GE13
MDH2	chr7	76048051	76067508	0.159673440629408	gain	GE13
UBAP2L	chr1	154220179	154271510	0.159637217282709	gain	GE13
STYXL1	chr7	75996338	76048004	0.159498959069106	gain	GE13
HIP1	chr7	75533298	75738962	0.159491665168195	gain	GE13
DNAJC30	chr7	73680918	73683453	0.159391999118705	gain	GE13
TMEM120A	chr7	75986831	75994656	0.159288419614707	gain	GE13
RHBDD2	chr7	75842602	75888926	0.159225008613883	gain	GE13
HSPB1	chr7	76302673	76304295	0.159163550341636	gain	GE13
POR	chr7	75899200	75986855	0.159158650195614	gain	GE13
S100A4	chr1	153543613	153550136	0.159119977984896	gain	GE13
LAMTOR4	chr7	100148907	100155944	0.158802474418426	gain	GE13
HAX1	chr1	154272589	154275875	0.158790040691944	gain	GE13
COPS6	chr7	100088969	100092187	0.158714895184683	gain	GE13
MCM7	chr7	100092728	100101940	0.158681817758746	gain	GE13
TAF6	chr7	100107070	100119841	0.158655996892295	gain	GE13
TBL2	chr7	73567537	73578791	0.158619228169734	gain	GE13
PILRB	chr7	100352176	100367733	0.158521346072697	gain	GE13
ZNF3	chr7	100064033	100082548	0.158425290611745	gain	GE13
POP7	chr7	100706121	100707486	0.158207650168866	gain	GE13
MEPCE	chr7	100428790	100434118	0.158175841779096	gain	GE13
EPHB4	chr7	100802565	100827523	0.158101301639922	gain	GE13
GNB2	chr7	100673567	100679174	0.158068887308183	gain	GE13
ARL5B	chr10	18659431	18681639	-0.0772084	loss	GE13
MRC1	chr10	17809348	17911164	-0.0770863	loss	GE13
PLXDC2	chr10	19816239	20289856	-0.0770535	loss	GE13
VIM	chr10	17228241	17237593	-0.0769554	loss	GE13
NEBL	chr10	20779973	21174187	-0.0768439	loss	GE13
PIP4K2A	chr10	22534854	22714578	-0.0768418	loss	GE13
BMI1	chr10	22321099	22331484	-0.0767945	loss	GE13
MLLT10	chr10	21524646	21743630	-0.0767608	loss	GE13
DNAJC1	chr10	21756548	22003769	-0.0767182	loss	GE13
COMMD3	chr10	22316386	22320306	-0.0767014	loss	GE13
KIAA1217	chr10	23694746	24547848	-0.076687	loss	GE13
MSRB2	chr10	23095579	23122013	-0.0766085	loss	GE13
IDI1	chr10	1039152	1049170	-0.0765934	loss	GE13
RSU1	chr10	16590611	16817463	-0.0765628	loss	GE13
GTPBP4	chr10	988434	1019932	-0.0765619	loss	GE13
OTUD1	chr10	23439458	23442390	-0.0765481	loss	GE13
ARHGAP21	chr10	24583609	24723887	-0.0765068	loss	GE13
ZMYND11	chr10	134465	254637	-0.0764554	loss	GE13
LARP4B	chr10	806914	931705	-0.0764092	loss	GE13
PTER	chr10	16436943	16513745	-0.0763384	loss	GE13
PFKP	chr10	3066333	3137718	-0.0762611	loss	GE13
APBB1IP	chr10	26438341	26567803	-0.0760991	loss	GE13
RPP38	chr10	15097180	15139818	-0.0760551	loss	GE13
PITRM1	chr10	3137728	3172841	-0.0759769	loss	GE13
FAM107B	chr10	14518557	14774897	-0.075914	loss	GE13
KLF6	chr10	3775996	3785281	-0.0759061	loss	GE13
PRPF18	chr10	13586939	13630859	-0.0754729	loss	GE13
ABI1	chr10	26746593	26861087	-0.0753276	loss	GE13
AKR1C1	chr10	4963253	4983283	-0.0752302	loss	GE13
CREM	chr10	35126791	35212958	-0.0751436	loss	GE13
SEPHS1	chr10	13317428	13348298	-0.0751391	loss	GE13
NAMPTP1	chr10	36521721	36524234	-0.0750288	loss	GE13
CCNY	chr10	35247025	35572669	-0.0749782	loss	GE13
ZNF33A	chr10	38010650	38065088	-0.0748144	loss	GE13
PHYH	chr10	13277796	13302412	-0.0747493	loss	GE13
CUL2	chr10	35008551	35090642	-0.0746772	loss	GE13
ZNF37A	chr10	38094334	38150293	-0.0746559	loss	GE13
OPTN	chr10	13099449	13138308	-0.0746372	loss	GE13
AKR1C2	chr10	4987400	5018031	-0.0745605	loss	GE13
CAMK1D	chr10	12349482	12835545	-0.074429	loss	GE13
ZNF33B	chr10	42574185	42638570	-0.0743509	loss	GE13
ANKRD26	chr10	26991914	27100498	-0.0742938	loss	GE13
BMS1	chr10	42782795	42834937	-0.0741731	loss	GE13
PARD3	chr10	34109560	34815325	-0.0741447	loss	GE13
CDC123	chr10	12195965	12250589	-0.0740959	loss	GE13
AKR1C3	chr10	5035354	5107686	-0.0740186	loss	GE13
CSGALNACT2	chr10	43138445	43185302	-0.0739702	loss	GE13
NRP1	chr10	33177492	33336262	-0.0739512	loss	GE13
ITGB1	chr10	32900318	33005792	-0.0739249	loss	GE13
DHTKD1	chr10	12068954	12123221	-0.0737859	loss	GE13

## Sheet: Sheet9
Table S9. Interaction network of prognosis-associated LRs in CM2. Related to Figure 4.
source	target	ligand	receptor	prob	pval	interaction_name	interaction_name_2	pathway_name	annotation	evidence
Astrocyte_01_CAV1	Endothelial_02_PTMAP2	BMP7	ACVR1_BMPR2	0.00353372322404057	0	BMP7_ACVR1_BMPR2	BMP7 - (ACVR1+BMPR2)	BMP	Secreted Signaling	KEGG: hsa04350; PMID:26893264
Astrocyte_03_ROM1	Endothelial_02_PTMAP2	BMP7	ACVR1_BMPR2	0.00203462989951265	0	BMP7_ACVR1_BMPR2	BMP7 - (ACVR1+BMPR2)	BMP	Secreted Signaling	KEGG: hsa04350; PMID:26893264
Astrocyte_04_SCGB3A1	Endothelial_02_PTMAP2	BMP7	ACVR1_BMPR2	0.00278471385757421	0	BMP7_ACVR1_BMPR2	BMP7 - (ACVR1+BMPR2)	BMP	Secreted Signaling	KEGG: hsa04350; PMID:26893264
Astrocyte_05_HLA-DRB5	Endothelial_02_PTMAP2	BMP7	ACVR1_BMPR2	0.00215969525112194	0	BMP7_ACVR1_BMPR2	BMP7 - (ACVR1+BMPR2)	BMP	Secreted Signaling	KEGG: hsa04350; PMID:26893264
Astrocyte_06_CCL5	Endothelial_02_PTMAP2	BMP7	ACVR1_BMPR2	0.00240245806231971	0	BMP7_ACVR1_BMPR2	BMP7 - (ACVR1+BMPR2)	BMP	Secreted Signaling	KEGG: hsa04350; PMID:26893264
Astrocyte_01_CAV1	Fibroblast_01_Myo_HIGD1B	BMP7	ACVR1_BMPR2	0.00153629936717419	0	BMP7_ACVR1_BMPR2	BMP7 - (ACVR1+BMPR2)	BMP	Secreted Signaling	KEGG: hsa04350; PMID:26893264
Astrocyte_03_ROM1	Fibroblast_01_Myo_HIGD1B	BMP7	ACVR1_BMPR2	0.000883815595964001	0	BMP7_ACVR1_BMPR2	BMP7 - (ACVR1+BMPR2)	BMP	Secreted Signaling	KEGG: hsa04350; PMID:26893264
Astrocyte_04_SCGB3A1	Fibroblast_01_Myo_HIGD1B	BMP7	ACVR1_BMPR2	0.00120994033995868	0	BMP7_ACVR1_BMPR2	BMP7 - (ACVR1+BMPR2)	BMP	Secreted Signaling	KEGG: hsa04350; PMID:26893264
Astrocyte_05_HLA-DRB5	Fibroblast_01_Myo_HIGD1B	BMP7	ACVR1_BMPR2	0.000938005449552481	0	BMP7_ACVR1_BMPR2	BMP7 - (ACVR1+BMPR2)	BMP	Secreted Signaling	KEGG: hsa04350; PMID:26893264
Astrocyte_06_CCL5	Fibroblast_01_Myo_HIGD1B	BMP7	ACVR1_BMPR2	0.00104353757964455	0	BMP7_ACVR1_BMPR2	BMP7 - (ACVR1+BMPR2)	BMP	Secreted Signaling	KEGG: hsa04350; PMID:26893264
Astrocyte_01_CAV1	Fibroblast_02_Myo_COL10A1	BMP7	ACVR1_BMPR2	0.000995088607610526	0	BMP7_ACVR1_BMPR2	BMP7 - (ACVR1+BMPR2)	BMP	Secreted Signaling	KEGG: hsa04350; PMID:26893264
Astrocyte_03_ROM1	Fibroblast_02_Myo_COL10A1	BMP7	ACVR1_BMPR2	0.000572420720474417	0	BMP7_ACVR1_BMPR2	BMP7 - (ACVR1+BMPR2)	BMP	Secreted Signaling	KEGG: hsa04350; PMID:26893264
Astrocyte_04_SCGB3A1	Fibroblast_02_Myo_COL10A1	BMP7	ACVR1_BMPR2	0.000783658849008345	0	BMP7_ACVR1_BMPR2	BMP7 - (ACVR1+BMPR2)	BMP	Secreted Signaling	KEGG: hsa04350; PMID:26893264
Astrocyte_05_HLA-DRB5	Fibroblast_02_Myo_COL10A1	BMP7	ACVR1_BMPR2	0.000607510081698364	0	BMP7_ACVR1_BMPR2	BMP7 - (ACVR1+BMPR2)	BMP	Secreted Signaling	KEGG: hsa04350; PMID:26893264
Astrocyte_06_CCL5	Fibroblast_02_Myo_COL10A1	BMP7	ACVR1_BMPR2	0.000675864563711821	0	BMP7_ACVR1_BMPR2	BMP7 - (ACVR1+BMPR2)	BMP	Secreted Signaling	KEGG: hsa04350; PMID:26893264
Astrocyte_01_CAV1	Fibroblast_03_Myo_MKI67	BMP7	ACVR1_BMPR2	0.00105930466079891	0	BMP7_ACVR1_BMPR2	BMP7 - (ACVR1+BMPR2)	BMP	Secreted Signaling	KEGG: hsa04350; PMID:26893264
Astrocyte_03_ROM1	Fibroblast_03_Myo_MKI67	BMP7	ACVR1_BMPR2	0.000609280440186528	0	BMP7_ACVR1_BMPR2	BMP7 - (ACVR1+BMPR2)	BMP	Secreted Signaling	KEGG: hsa04350; PMID:26893264
Astrocyte_04_SCGB3A1	Fibroblast_03_Myo_MKI67	BMP7	ACVR1_BMPR2	0.000834152838581359	0	BMP7_ACVR1_BMPR2	BMP7 - (ACVR1+BMPR2)	BMP	Secreted Signaling	KEGG: hsa04350; PMID:26893264
Astrocyte_05_HLA-DRB5	Fibroblast_03_Myo_MKI67	BMP7	ACVR1_BMPR2	0.000646614602442712	0	BMP7_ACVR1_BMPR2	BMP7 - (ACVR1+BMPR2)	BMP	Secreted Signaling	KEGG: hsa04350; PMID:26893264
Astrocyte_06_CCL5	Fibroblast_03_Myo_MKI67	BMP7	ACVR1_BMPR2	0.000719379127531195	0	BMP7_ACVR1_BMPR2	BMP7 - (ACVR1+BMPR2)	BMP	Secreted Signaling	KEGG: hsa04350; PMID:26893264
Astrocyte_01_CAV1	GE9	BMP7	ACVR1_BMPR2	0.00108586526467453	0	BMP7_ACVR1_BMPR2	BMP7 - (ACVR1+BMPR2)	BMP	Secreted Signaling	KEGG: hsa04350; PMID:26893264
Astrocyte_03_ROM1	GE9	BMP7	ACVR1_BMPR2	0.000624545183047041	0	BMP7_ACVR1_BMPR2	BMP7 - (ACVR1+BMPR2)	BMP	Secreted Signaling	KEGG: hsa04350; PMID:26893264
Astrocyte_04_SCGB3A1	GE9	BMP7	ACVR1_BMPR2	0.000855056314603348	0	BMP7_ACVR1_BMPR2	BMP7 - (ACVR1+BMPR2)	BMP	Secreted Signaling	KEGG: hsa04350; PMID:26893264
Astrocyte_05_HLA-DRB5	GE9	BMP7	ACVR1_BMPR2	0.000662812486141967	0	BMP7_ACVR1_BMPR2	BMP7 - (ACVR1+BMPR2)	BMP	Secreted Signaling	KEGG: hsa04350; PMID:26893264
Astrocyte_06_CCL5	GE9	BMP7	ACVR1_BMPR2	0.000737401318576125	0	BMP7_ACVR1_BMPR2	BMP7 - (ACVR1+BMPR2)	BMP	Secreted Signaling	KEGG: hsa04350; PMID:26893264
Astrocyte_01_CAV1	Endothelial_02_PTMAP2	FGF1	FGFR1	0.0061530315294557	0	FGF1_FGFR1	FGF1 - FGFR1	FGF	Secreted Signaling	PMC: 4393358
Astrocyte_02_MALAT1	Endothelial_02_PTMAP2	FGF1	FGFR1	0.00141644622168192	0	FGF1_FGFR1	FGF1 - FGFR1	FGF	Secreted Signaling	PMC: 4393358
Astrocyte_03_ROM1	Endothelial_02_PTMAP2	FGF1	FGFR1	0.00615855754520788	0	FGF1_FGFR1	FGF1 - FGFR1	FGF	Secreted Signaling	PMC: 4393358
Astrocyte_04_SCGB3A1	Endothelial_02_PTMAP2	FGF1	FGFR1	0.00868139093798412	0	FGF1_FGFR1	FGF1 - FGFR1	FGF	Secreted Signaling	PMC: 4393358
Astrocyte_05_HLA-DRB5	Endothelial_02_PTMAP2	FGF1	FGFR1	0.00454843659360406	0	FGF1_FGFR1	FGF1 - FGFR1	FGF	Secreted Signaling	PMC: 4393358
Astrocyte_06_CCL5	Endothelial_02_PTMAP2	FGF1	FGFR1	0.00232934496872701	0	FGF1_FGFR1	FGF1 - FGFR1	FGF	Secreted Signaling	PMC: 4393358
Astrocyte_01_CAV1	Fibroblast_02_Myo_COL10A1	FGF1	FGFR1	0.0144141834240586	0	FGF1_FGFR1	FGF1 - FGFR1	FGF	Secreted Signaling	PMC: 4393358
Astrocyte_02_MALAT1	Fibroblast_02_Myo_COL10A1	FGF1	FGFR1	0.00333955714112183	0	FGF1_FGFR1	FGF1 - FGFR1	FGF	Secreted Signaling	PMC: 4393358
Astrocyte_03_ROM1	Fibroblast_02_Myo_COL10A1	FGF1	FGFR1	0.0144270210497244	0	FGF1_FGFR1	FGF1 - FGFR1	FGF	Secreted Signaling	PMC: 4393358
Astrocyte_04_SCGB3A1	Fibroblast_02_Myo_COL10A1	FGF1	FGFR1	0.0202679281473478	0	FGF1_FGFR1	FGF1 - FGFR1	FGF	Secreted Signaling	PMC: 4393358
Astrocyte_05_HLA-DRB5	Fibroblast_02_Myo_COL10A1	FGF1	FGFR1	0.0106783828311768	0	FGF1_FGFR1	FGF1 - FGFR1	FGF	Secreted Signaling	PMC: 4393358
Astrocyte_06_CCL5	Fibroblast_02_Myo_COL10A1	FGF1	FGFR1	0.00548509162507501	0	FGF1_FGFR1	FGF1 - FGFR1	FGF	Secreted Signaling	PMC: 4393358
Astrocyte_01_CAV1	Fibroblast_03_Myo_MKI67	FGF1	FGFR1	0.0037879448687861	0	FGF1_FGFR1	FGF1 - FGFR1	FGF	Secreted Signaling	PMC: 4393358
Astrocyte_02_MALAT1	Fibroblast_03_Myo_MKI67	FGF1	FGFR1	0.000870401717585841	0	FGF1_FGFR1	FGF1 - FGFR1	FGF	Secreted Signaling	PMC: 4393358
Astrocyte_03_ROM1	Fibroblast_03_Myo_MKI67	FGF1	FGFR1	0.00379135491159613	0	FGF1_FGFR1	FGF1 - FGFR1	FGF	Secreted Signaling	PMC: 4393358
Astrocyte_04_SCGB3A1	Fibroblast_03_Myo_MKI67	FGF1	FGFR1	0.00534969115289768	0	FGF1_FGFR1	FGF1 - FGFR1	FGF	Secreted Signaling	PMC: 4393358
Astrocyte_05_HLA-DRB5	Fibroblast_03_Myo_MKI67	FGF1	FGFR1	0.00279838342160165	0	FGF1_FGFR1	FGF1 - FGFR1	FGF	Secreted Signaling	PMC: 4393358
Astrocyte_06_CCL5	Fibroblast_03_Myo_MKI67	FGF1	FGFR1	0.00143187973622362	0	FGF1_FGFR1	FGF1 - FGFR1	FGF	Secreted Signaling	PMC: 4393358
Astrocyte_01_CAV1	Astrocyte_01_CAV1	FGF1	FGFR2	0.0580611290666617	0	FGF1_FGFR2	FGF1 - FGFR2	FGF	Secreted Signaling	PMC: 4393358
Astrocyte_02_MALAT1	Astrocyte_01_CAV1	FGF1	FGFR2	0.0139257449175556	0	FGF1_FGFR2	FGF1 - FGFR2	FGF	Secreted Signaling	PMC: 4393358
Astrocyte_03_ROM1	Astrocyte_01_CAV1	FGF1	FGFR2	0.0581105477631543	0	FGF1_FGFR2	FGF1 - FGFR2	FGF	Secreted Signaling	PMC: 4393358
Astrocyte_04_SCGB3A1	Astrocyte_01_CAV1	FGF1	FGFR2	0.0801980001755601	0	FGF1_FGFR2	FGF1 - FGFR2	FGF	Secreted Signaling	PMC: 4393358
Astrocyte_05_HLA-DRB5	Astrocyte_01_CAV1	FGF1	FGFR2	0.0435125391808032	0	FGF1_FGFR2	FGF1 - FGFR2	FGF	Secreted Signaling	PMC: 4393358
Astrocyte_06_CCL5	Astrocyte_01_CAV1	FGF1	FGFR2	0.0227174658741775	0	FGF1_FGFR2	FGF1 - FGFR2	FGF	Secreted Signaling	PMC: 4393358
Astrocyte_01_CAV1	Astrocyte_02_MALAT1	FGF1	FGFR2	0.0297609182164017	0	FGF1_FGFR2	FGF1 - FGFR2	FGF	Secreted Signaling	PMC: 4393358
Astrocyte_02_MALAT1	Astrocyte_02_MALAT1	FGF1	FGFR2	0.00697866257907014	0	FGF1_FGFR2	FGF1 - FGFR2	FGF	Secreted Signaling	PMC: 4393358
Astrocyte_03_ROM1	Astrocyte_02_MALAT1	FGF1	FGFR2	0.029787010932353	0	FGF1_FGFR2	FGF1 - FGFR2	FGF	Secreted Signaling	PMC: 4393358
Astrocyte_04_SCGB3A1	Astrocyte_02_MALAT1	FGF1	FGFR2	0.041584163987293	0	FGF1_FGFR2	FGF1 - FGFR2	FGF	Secreted Signaling	PMC: 4393358
Astrocyte_05_HLA-DRB5	Astrocyte_02_MALAT1	FGF1	FGFR2	0.0221369601028791	0	FGF1_FGFR2	FGF1 - FGFR2	FGF	Secreted Signaling	PMC: 4393358
Astrocyte_06_CCL5	Astrocyte_02_MALAT1	FGF1	FGFR2	0.0114353543363064	0	FGF1_FGFR2	FGF1 - FGFR2	FGF	Secreted Signaling	PMC: 4393358
Astrocyte_01_CAV1	Astrocyte_03_ROM1	FGF1	FGFR2	0.0609113066945865	0	FGF1_FGFR2	FGF1 - FGFR2	FGF	Secreted Signaling	PMC: 4393358
Astrocyte_02_MALAT1	Astrocyte_03_ROM1	FGF1	FGFR2	0.0146430301125378	0	FGF1_FGFR2	FGF1 - FGFR2	FGF	Secreted Signaling	PMC: 4393358
Astrocyte_03_ROM1	Astrocyte_03_ROM1	FGF1	FGFR2	0.0609629943102936	0	FGF1_FGFR2	FGF1 - FGFR2	FGF	Secreted Signaling	PMC: 4393358
Astrocyte_04_SCGB3A1	Astrocyte_03_ROM1	FGF1	FGFR2	0.0840379086865038	0	FGF1_FGFR2	FGF1 - FGFR2	FGF	Secreted Signaling	PMC: 4393358
Astrocyte_05_HLA-DRB5	Astrocyte_03_ROM1	FGF1	FGFR2	0.0456831744062976	0	FGF1_FGFR2	FGF1 - FGFR2	FGF	Secreted Signaling	PMC: 4393358
Astrocyte_06_CCL5	Astrocyte_03_ROM1	FGF1	FGFR2	0.0238766286702651	0	FGF1_FGFR2	FGF1 - FGFR2	FGF	Secreted Signaling	PMC: 4393358
Astrocyte_01_CAV1	Astrocyte_04_SCGB3A1	FGF1	FGFR2	0.0495190675420299	0	FGF1_FGFR2	FGF1 - FGFR2	FGF	Secreted Signaling	PMC: 4393358
Astrocyte_02_MALAT1	Astrocyte_04_SCGB3A1	FGF1	FGFR2	0.0117956497532421	0	FGF1_FGFR2	FGF1 - FGFR2	FGF	Secreted Signaling	PMC: 4393358
Astrocyte_03_ROM1	Astrocyte_04_SCGB3A1	FGF1	FGFR2	0.0495615982203241	0	FGF1_FGFR2	FGF1 - FGFR2	FGF	Secreted Signaling	PMC: 4393358
Astrocyte_04_SCGB3A1	Astrocyte_04_SCGB3A1	FGF1	FGFR2	0.0686364360617161	0	FGF1_FGFR2	FGF1 - FGFR2	FGF	Secreted Signaling	PMC: 4393358
Astrocyte_05_HLA-DRB5	Astrocyte_04_SCGB3A1	FGF1	FGFR2	0.037026755534333	0	FGF1_FGFR2	FGF1 - FGFR2	FGF	Secreted Signaling	PMC: 4393358
Astrocyte_06_CCL5	Astrocyte_04_SCGB3A1	FGF1	FGFR2	0.0192688592419357	0	FGF1_FGFR2	FGF1 - FGFR2	FGF	Secreted Signaling	PMC: 4393358
Astrocyte_01_CAV1	Astrocyte_05_HLA-DRB5	FGF1	FGFR2	0.0456717527019213	0	FGF1_FGFR2	FGF1 - FGFR2	FGF	Secreted Signaling	PMC: 4393358
Astrocyte_02_MALAT1	Astrocyte_05_HLA-DRB5	FGF1	FGFR2	0.0108457596202484	0	FGF1_FGFR2	FGF1 - FGFR2	FGF	Secreted Signaling	PMC: 4393358
Astrocyte_03_ROM1	Astrocyte_05_HLA-DRB5	FGF1	FGFR2	0.0457111379340039	0	FGF1_FGFR2	FGF1 - FGFR2	FGF	Secreted Signaling	PMC: 4393358
Astrocyte_04_SCGB3A1	Astrocyte_05_HLA-DRB5	FGF1	FGFR2	0.0634029023850728	0	FGF1_FGFR2	FGF1 - FGFR2	FGF	Secreted Signaling	PMC: 4393358
Astrocyte_05_HLA-DRB5	Astrocyte_05_HLA-DRB5	FGF1	FGFR2	0.0341151771170503	0	FGF1_FGFR2	FGF1 - FGFR2	FGF	Secreted Signaling	PMC: 4393358
Astrocyte_06_CCL5	Astrocyte_05_HLA-DRB5	FGF1	FGFR2	0.0177279563196229	0	FGF1_FGFR2	FGF1 - FGFR2	FGF	Secreted Signaling	PMC: 4393358
Astrocyte_01_CAV1	Astrocyte_06_CCL5	FGF1	FGFR2	0.0522345315971019	0	FGF1_FGFR2	FGF1 - FGFR2	FGF	Secreted Signaling	PMC: 4393358
Astrocyte_02_MALAT1	Astrocyte_06_CCL5	FGF1	FGFR2	0.0124696236103202	0	FGF1_FGFR2	FGF1 - FGFR2	FGF	Secreted Signaling	PMC: 4393358
Astrocyte_03_ROM1	Astrocyte_06_CCL5	FGF1	FGFR2	0.0522792662386869	0	FGF1_FGFR2	FGF1 - FGFR2	FGF	Secreted Signaling	PMC: 4393358
Astrocyte_04_SCGB3A1	Astrocyte_06_CCL5	FGF1	FGFR2	0.0723204682672373	0	FGF1_FGFR2	FGF1 - FGFR2	FGF	Secreted Signaling	PMC: 4393358
Astrocyte_05_HLA-DRB5	Astrocyte_06_CCL5	FGF1	FGFR2	0.0390853518512097	0	FGF1_FGFR2	FGF1 - FGFR2	FGF	Secreted Signaling	PMC: 4393358
Astrocyte_06_CCL5	Astrocyte_06_CCL5	FGF1	FGFR2	0.0203610356060332	0	FGF1_FGFR2	FGF1 - FGFR2	FGF	Secreted Signaling	PMC: 4393358
Astrocyte_01_CAV1	GE1	FGF1	FGFR3	0.00424122843148059	0	FGF1_FGFR3	FGF1 - FGFR3	FGF	Secreted Signaling	PMC: 4393358
Astrocyte_02_MALAT1	GE1	FGF1	FGFR3	0.0009748997996615	0	FGF1_FGFR3	FGF1 - FGFR3	FGF	Secreted Signaling	PMC: 4393358
Astrocyte_03_ROM1	GE1	FGF1	FGFR3	0.0042450447974612	0	FGF1_FGFR3	FGF1 - FGFR3	FGF	Secreted Signaling	PMC: 4393358
Astrocyte_04_SCGB3A1	GE1	FGF1	FGFR3	0.00598873726322621	0	FGF1_FGFR3	FGF1 - FGFR3	FGF	Secreted Signaling	PMC: 4393358
Astrocyte_05_HLA-DRB5	GE1	FGF1	FGFR3	0.00313362381941864	0	FGF1_FGFR3	FGF1 - FGFR3	FGF	Secreted Signaling	PMC: 4393358
Astrocyte_06_CCL5	GE1	FGF1	FGFR3	0.0016036791570388	0	FGF1_FGFR3	FGF1 - FGFR3	FGF	Secreted Signaling	PMC: 4393358
Astrocyte_01_CAV1	GE11	FGF1	FGFR3	0.00465965301434036	0	FGF1_FGFR3	FGF1 - FGFR3	FGF	Secreted Signaling	PMC: 4393358
Astrocyte_02_MALAT1	GE11	FGF1	FGFR3	0.00107142669453783	0	FGF1_FGFR3	FGF1 - FGFR3	FGF	Secreted Signaling	PMC: 4393358
Astrocyte_03_ROM1	GE11	FGF1	FGFR3	0.00466384412601921	0	FGF1_FGFR3	FGF1 - FGFR3	FGF	Secreted Signaling	PMC: 4393358
Astrocyte_04_SCGB3A1	GE11	FGF1	FGFR3	0.00657842590991531	0	FGF1_FGFR3	FGF1 - FGFR3	FGF	Secreted Signaling	PMC: 4393358
Astrocyte_05_HLA-DRB5	GE11	FGF1	FGFR3	0.00344315389627645	0	FGF1_FGFR3	FGF1 - FGFR3	FGF	Secreted Signaling	PMC: 4393358
Astrocyte_06_CCL5	GE11	FGF1	FGFR3	0.00176235300292164	0	FGF1_FGFR3	FGF1 - FGFR3	FGF	Secreted Signaling	PMC: 4393358
Astrocyte_01_CAV1	GE2	FGF1	FGFR3	0.00393124789431127	0	FGF1_FGFR3	FGF1 - FGFR3	FGF	Secreted Signaling	PMC: 4393358
Astrocyte_02_MALAT1	GE2	FGF1	FGFR3	0.000903430274694708	0	FGF1_FGFR3	FGF1 - FGFR3	FGF	Secreted Signaling	PMC: 4393358
Astrocyte_03_ROM1	GE2	FGF1	FGFR3	0.00393478643406294	0	FGF1_FGFR3	FGF1 - FGFR3	FGF	Secreted Signaling	PMC: 4393358
Astrocyte_04_SCGB3A1	GE2	FGF1	FGFR3	0.00555174787027106	0	FGF1_FGFR3	FGF1 - FGFR3	FGF	Secreted Signaling	PMC: 4393358
Astrocyte_05_HLA-DRB5	GE2	FGF1	FGFR3	0.00290435915507289	0	FGF1_FGFR3	FGF1 - FGFR3	FGF	Secreted Signaling	PMC: 4393358
Astrocyte_06_CCL5	GE2	FGF1	FGFR3	0.00148618263533686	0	FGF1_FGFR3	FGF1 - FGFR3	FGF	Secreted Signaling	PMC: 4393358
Fibroblast_02_Myo_COL10A1	Endothelial_02_PTMAP2	FGF7	FGFR1	0.0014259200086024	0	FGF7_FGFR1	FGF7 - FGFR1	FGF	Secreted Signaling	PMC: 4393358
Fibroblast_02_Myo_COL10A1	Fibroblast_02_Myo_COL10A1	FGF7	FGFR1	0.00336185019776613	0	FGF7_FGFR1	FGF7 - FGFR1	FGF	Secreted Signaling	PMC: 4393358
Fibroblast_02_Myo_COL10A1	Fibroblast_03_Myo_MKI67	FGF7	FGFR1	0.000876226534318411	0	FGF7_FGFR1	FGF7 - FGFR1	FGF	Secreted Signaling	PMC: 4393358
Fibroblast_02_Myo_COL10A1	Astrocyte_01_CAV1	FGF7	FGFR2	0.0140177116555939	0	FGF7_FGFR2	FGF7 - FGFR2	FGF	Secreted Signaling	PMC: 4393358
Fibroblast_02_Myo_COL10A1	Astrocyte_02_MALAT1	FGF7	FGFR2	0.00702507708316562	0	FGF7_FGFR2	FGF7 - FGFR2	FGF	Secreted Signaling	PMC: 4393358
Fibroblast_02_Myo_COL10A1	Astrocyte_03_ROM1	FGF7	FGFR2	0.0147396630516497	0	FGF7_FGFR2	FGF7 - FGFR2	FGF	Secreted Signaling	PMC: 4393358
Fibroblast_02_Myo_COL10A1	Astrocyte_04_SCGB3A1	FGF7	FGFR2	0.011873718561992	0	FGF7_FGFR2	FGF7 - FGFR2	FGF	Secreted Signaling	PMC: 4393358
Fibroblast_02_Myo_COL10A1	Astrocyte_05_HLA-DRB5	FGF7	FGFR2	0.0109176110934782	0	FGF7_FGFR2	FGF7 - FGFR2	FGF	Secreted Signaling	PMC: 4393358
Fibroblast_02_Myo_COL10A1	Astrocyte_06_CCL5	FGF7	FGFR2	0.0125520964161828	0	FGF7_FGFR2	FGF7 - FGFR2	FGF	Secreted Signaling	PMC: 4393358
Endothelial_02_PTMAP2	Endothelial_02_PTMAP2	APLN	APLNR	0.00233708469616024	0	APLN_APLNR	APLN - APLNR	APELIN	Secreted Signaling	KEGG: hsa04371
Endothelial_02_PTMAP2	Macrophage_06_C3	CX3CL1	CX3CR1	0.00670174103653369	0	CX3CL1_CX3CR1	CX3CL1 - CX3CR1	CX3C	Secreted Signaling	KEGG: hsa04060
Astrocyte_05_HLA-DRB5	Neurophil_01_GOS2	IL1B	IL1R2	0.00270404967733291	0	IL1B_IL1R2	IL1B - IL1R2	IL1	Secreted Signaling	KEGG: hsa04060
Macrophage_06_C3	Neurophil_01_GOS2	IL1B	IL1R2	0.0117592858765606	0	IL1B_IL1R2	IL1B - IL1R2	IL1	Secreted Signaling	KEGG: hsa04060
Neurophil_01_GOS2	Neurophil_01_GOS2	IL1B	IL1R2	0.0141468330056679	0	IL1B_IL1R2	IL1B - IL1R2	IL1	Secreted Signaling	KEGG: hsa04060
Endothelial_02_PTMAP2	GE1	TNFSF10	TNFRSF10A	0.00292488313172472	0	TNFSF10_TNFRSF10B	TNFSF10 - TNFRSF10B	TRAIL	Secreted Signaling	KEGG: hsa04060
Fibroblast_02_Myo_COL10A1	GE1	TNFSF10	TNFRSF10A	0.00057435419394479	0	TNFSF10_TNFRSF10B	TNFSF10 - TNFRSF10B	TRAIL	Secreted Signaling	KEGG: hsa04060
GE1	GE1	TNFSF10	TNFRSF10A	0.00183217776247301	0	TNFSF10_TNFRSF10B	TNFSF10 - TNFRSF10B	TRAIL	Secreted Signaling	KEGG: hsa04060
GE11	GE1	TNFSF10	TNFRSF10A	0.00197882494646503	0	TNFSF10_TNFRSF10B	TNFSF10 - TNFRSF10B	TRAIL	Secreted Signaling	KEGG: hsa04060
GE2	GE1	TNFSF10	TNFRSF10A	0.000822616410926358	0	TNFSF10_TNFRSF10B	TNFSF10 - TNFRSF10B	TRAIL	Secreted Signaling	KEGG: hsa04060
GE8	GE1	TNFSF10	TNFRSF10A	0.000383996241708047	0	TNFSF10_TNFRSF10B	TNFSF10 - TNFRSF10B	TRAIL	Secreted Signaling	KEGG: hsa04060
Endothelial_02_PTMAP2	GE11	TNFSF10	TNFRSF10A	0.0038235271904603	0	TNFSF10_TNFRSF10B	TNFSF10 - TNFRSF10B	TRAIL	Secreted Signaling	KEGG: hsa04060
Fibroblast_02_Myo_COL10A1	GE11	TNFSF10	TNFRSF10A	0.000751363569455995	0	TNFSF10_TNFRSF10B	TNFSF10 - TNFRSF10B	TRAIL	Secreted Signaling	KEGG: hsa04060
GE1	GE11	TNFSF10	TNFRSF10A	0.00239590463776818	0	TNFSF10_TNFRSF10B	TNFSF10 - TNFRSF10B	TRAIL	Secreted Signaling	KEGG: hsa04060
GE11	GE11	TNFSF10	TNFRSF10A	0.0025875554547781	0	TNFSF10_TNFRSF10B	TNFSF10 - TNFRSF10B	TRAIL	Secreted Signaling	KEGG: hsa04060
GE2	GE11	TNFSF10	TNFRSF10A	0.00107605497651313	0	TNFSF10_TNFRSF10B	TNFSF10 - TNFRSF10B	TRAIL	Secreted Signaling	KEGG: hsa04060
GE8	GE11	TNFSF10	TNFRSF10A	0.000502368968471295	0	TNFSF10_TNFRSF10B	TNFSF10 - TNFRSF10B	TRAIL	Secreted Signaling	KEGG: hsa04060
Endothelial_02_PTMAP2	GE2	TNFSF10	TNFRSF10A	0.00262797189919756	0	TNFSF10_TNFRSF10B	TNFSF10 - TNFRSF10B	TRAIL	Secreted Signaling	KEGG: hsa04060
Fibroblast_02_Myo_COL10A1	GE2	TNFSF10	TNFRSF10A	0.000515926788583999	0	TNFSF10_TNFRSF10B	TNFSF10 - TNFRSF10B	TRAIL	Secreted Signaling	KEGG: hsa04060
GE1	GE2	TNFSF10	TNFRSF10A	0.00164600630733974	0	TNFSF10_TNFRSF10B	TNFSF10 - TNFRSF10B	TRAIL	Secreted Signaling	KEGG: hsa04060
GE11	GE2	TNFSF10	TNFRSF10A	0.00177777890053729	0	TNFSF10_TNFRSF10B	TNFSF10 - TNFRSF10B	TRAIL	Secreted Signaling	KEGG: hsa04060
GE2	GE2	TNFSF10	TNFRSF10A	0.000738952675027145	0	TNFSF10_TNFRSF10B	TNFSF10 - TNFRSF10B	TRAIL	Secreted Signaling	KEGG: hsa04060
GE8	GE2	TNFSF10	TNFRSF10A	0.000344926721837974	0	TNFSF10_TNFRSF10B	TNFSF10 - TNFRSF10B	TRAIL	Secreted Signaling	KEGG: hsa04060
Endothelial_02_PTMAP2	GE8	TNFSF10	TNFRSF10A	0.00395270882857189	0	TNFSF10_TNFRSF10B	TNFSF10 - TNFRSF10B	TRAIL	Secreted Signaling	KEGG: hsa04060
Fibroblast_02_Myo_COL10A1	GE8	TNFSF10	TNFRSF10A	0.000776830070281167	0	TNFSF10_TNFRSF10B	TNFSF10 - TNFRSF10B	TRAIL	Secreted Signaling	KEGG: hsa04060
GE1	GE8	TNFSF10	TNFRSF10A	0.00247697257151771	0	TNFSF10_TNFRSF10B	TNFSF10 - TNFRSF10B	TRAIL	Secreted Signaling	KEGG: hsa04060
GE11	GE8	TNFSF10	TNFRSF10A	0.00267509070508798	0	TNFSF10_TNFRSF10B	TNFSF10 - TNFRSF10B	TRAIL	Secreted Signaling	KEGG: hsa04060
GE2	GE8	TNFSF10	TNFRSF10A	0.00111251422212662	0	TNFSF10_TNFRSF10B	TNFSF10 - TNFRSF10B	TRAIL	Secreted Signaling	KEGG: hsa04060
GE8	GE8	TNFSF10	TNFRSF10A	0.00051940050456972	0	TNFSF10_TNFRSF10B	TNFSF10 - TNFRSF10B	TRAIL	Secreted Signaling	KEGG: hsa04060
Endothelial_02_PTMAP2	GE9	TNFSF10	TNFRSF10A	0.0031595808074904	0	TNFSF10_TNFRSF10B	TNFSF10 - TNFRSF10B	TRAIL	Secreted Signaling	KEGG: hsa04060
Fibroblast_02_Myo_COL10A1	GE9	TNFSF10	TNFRSF10A	0.000620558754012587	0	TNFSF10_TNFRSF10B	TNFSF10 - TNFRSF10B	TRAIL	Secreted Signaling	KEGG: hsa04060
GE1	GE9	TNFSF10	TNFRSF10A	0.00197936893285815	0	TNFSF10_TNFRSF10B	TNFSF10 - TNFRSF10B	TRAIL	Secreted Signaling	KEGG: hsa04060
GE11	GE9	TNFSF10	TNFRSF10A	0.0021377720404362	0	TNFSF10_TNFRSF10B	TNFSF10 - TNFRSF10B	TRAIL	Secreted Signaling	KEGG: hsa04060
GE2	GE9	TNFSF10	TNFRSF10A	0.000888774939778725	0	TNFSF10_TNFRSF10B	TNFSF10 - TNFRSF10B	TRAIL	Secreted Signaling	KEGG: hsa04060
GE8	GE9	TNFSF10	TNFRSF10A	0.000414893602356682	0	TNFSF10_TNFRSF10B	TNFSF10 - TNFRSF10B	TRAIL	Secreted Signaling	KEGG: hsa04060
Macrophage_06_C3	B_04_PTMAP2	TNFSF13B	TNFRSF13C	0.004933864361093	0	TNFSF13B_TNFRSF13C	TNFSF13B - TNFRSF13C	BAFF	Secreted Signaling	KEGG: hsa04060
Astrocyte_01_CAV1	Endothelial_02_PTMAP2	ANGPTL2	ITGA5_ITGB1	0.0289937024127821	0	ANGPTL2_ITGA5_ITGB1	ANGPTL2 - (ITGA5+ITGB1)	ANGPTL	Secreted Signaling	PMID: 24478758
Astrocyte_03_ROM1	Endothelial_02_PTMAP2	ANGPTL2	ITGA5_ITGB1	0.0114179711196986	0	ANGPTL2_ITGA5_ITGB1	ANGPTL2 - (ITGA5+ITGB1)	ANGPTL	Secreted Signaling	PMID: 24478758
Astrocyte_04_SCGB3A1	Endothelial_02_PTMAP2	ANGPTL2	ITGA5_ITGB1	0.0105417141242522	0	ANGPTL2_ITGA5_ITGB1	ANGPTL2 - (ITGA5+ITGB1)	ANGPTL	Secreted Signaling	PMID: 24478758
Astrocyte_05_HLA-DRB5	Endothelial_02_PTMAP2	ANGPTL2	ITGA5_ITGB1	0.023760669205665	0	ANGPTL2_ITGA5_ITGB1	ANGPTL2 - (ITGA5+ITGB1)	ANGPTL	Secreted Signaling	PMID: 24478758
Astrocyte_06_CCL5	Endothelial_02_PTMAP2	ANGPTL2	ITGA5_ITGB1	0.0074852035695242	0	ANGPTL2_ITGA5_ITGB1	ANGPTL2 - (ITGA5+ITGB1)	ANGPTL	Secreted Signaling	PMID: 24478758
Endothelial_02_PTMAP2	Endothelial_02_PTMAP2	ANGPTL2	ITGA5_ITGB1	0.029085672047786	0	ANGPTL2_ITGA5_ITGB1	ANGPTL2 - (ITGA5+ITGB1)	ANGPTL	Secreted Signaling	PMID: 24478758
Fibroblast_02_Myo_COL10A1	Endothelial_02_PTMAP2	ANGPTL2	ITGA5_ITGB1	0.0123673688947002	0	ANGPTL2_ITGA5_ITGB1	ANGPTL2 - (ITGA5+ITGB1)	ANGPTL	Secreted Signaling	PMID: 24478758
Fibroblast_03_Myo_MKI67	Endothelial_02_PTMAP2	ANGPTL2	ITGA5_ITGB1	0.00594452718848382	0	ANGPTL2_ITGA5_ITGB1	ANGPTL2 - (ITGA5+ITGB1)	ANGPTL	Secreted Signaling	PMID: 24478758
Astrocyte_01_CAV1	Fibroblast_02_Myo_COL10A1	ANGPTL2	ITGA5_ITGB1	0.0135011171765735	0	ANGPTL2_ITGA5_ITGB1	ANGPTL2 - (ITGA5+ITGB1)	ANGPTL	Secreted Signaling	PMID: 24478758
Astrocyte_03_ROM1	Fibroblast_02_Myo_COL10A1	ANGPTL2	ITGA5_ITGB1	0.00526592539730258	0	ANGPTL2_ITGA5_ITGB1	ANGPTL2 - (ITGA5+ITGB1)	ANGPTL	Secreted Signaling	PMID: 24478758
Astrocyte_04_SCGB3A1	Fibroblast_02_Myo_COL10A1	ANGPTL2	ITGA5_ITGB1	0.00485947815495808	0	ANGPTL2_ITGA5_ITGB1	ANGPTL2 - (ITGA5+ITGB1)	ANGPTL	Secreted Signaling	PMID: 24478758
Astrocyte_05_HLA-DRB5	Fibroblast_02_Myo_COL10A1	ANGPTL2	ITGA5_ITGB1	0.0110325484766664	0	ANGPTL2_ITGA5_ITGB1	ANGPTL2 - (ITGA5+ITGB1)	ANGPTL	Secreted Signaling	PMID: 24478758
Astrocyte_06_CCL5	Fibroblast_02_Myo_COL10A1	ANGPTL2	ITGA5_ITGB1	0.00344476404617311	0	ANGPTL2_ITGA5_ITGB1	ANGPTL2 - (ITGA5+ITGB1)	ANGPTL	Secreted Signaling	PMID: 24478758
Endothelial_02_PTMAP2	Fibroblast_02_Myo_COL10A1	ANGPTL2	ITGA5_ITGB1	0.0135446289740182	0	ANGPTL2_ITGA5_ITGB1	ANGPTL2 - (ITGA5+ITGB1)	ANGPTL	Secreted Signaling	PMID: 24478758
Fibroblast_02_Myo_COL10A1	Fibroblast_02_Myo_COL10A1	ANGPTL2	ITGA5_ITGB1	0.00570673702100575	0	ANGPTL2_ITGA5_ITGB1	ANGPTL2 - (ITGA5+ITGB1)	ANGPTL	Secreted Signaling	PMID: 24478758
Fibroblast_03_Myo_MKI67	Fibroblast_02_Myo_COL10A1	ANGPTL2	ITGA5_ITGB1	0.00273343928828687	0	ANGPTL2_ITGA5_ITGB1	ANGPTL2 - (ITGA5+ITGB1)	ANGPTL	Secreted Signaling	PMID: 24478758
Astrocyte_01_CAV1	Fibroblast_03_Myo_MKI67	ANGPTL2	ITGA5_ITGB1	0.0181141554331581	0	ANGPTL2_ITGA5_ITGB1	ANGPTL2 - (ITGA5+ITGB1)	ANGPTL	Secreted Signaling	PMID: 24478758
Astrocyte_03_ROM1	Fibroblast_03_Myo_MKI67	ANGPTL2	ITGA5_ITGB1	0.00708538725265354	0	ANGPTL2_ITGA5_ITGB1	ANGPTL2 - (ITGA5+ITGB1)	ANGPTL	Secreted Signaling	PMID: 24478758
Astrocyte_04_SCGB3A1	Fibroblast_03_Myo_MKI67	ANGPTL2	ITGA5_ITGB1	0.00653942917608014	0	ANGPTL2_ITGA5_ITGB1	ANGPTL2 - (ITGA5+ITGB1)	ANGPTL	Secreted Signaling	PMID: 24478758
Astrocyte_05_HLA-DRB5	Fibroblast_03_Myo_MKI67	ANGPTL2	ITGA5_ITGB1	0.0148147971167072	0	ANGPTL2_ITGA5_ITGB1	ANGPTL2 - (ITGA5+ITGB1)	ANGPTL	Secreted Signaling	PMID: 24478758
Astrocyte_06_CCL5	Fibroblast_03_Myo_MKI67	ANGPTL2	ITGA5_ITGB1	0.00463791920209379	0	ANGPTL2_ITGA5_ITGB1	ANGPTL2 - (ITGA5+ITGB1)	ANGPTL	Secreted Signaling	PMID: 24478758
Endothelial_02_PTMAP2	Fibroblast_03_Myo_MKI67	ANGPTL2	ITGA5_ITGB1	0.0181722604008223	0	ANGPTL2_ITGA5_ITGB1	ANGPTL2 - (ITGA5+ITGB1)	ANGPTL	Secreted Signaling	PMID: 24478758
Fibroblast_02_Myo_COL10A1	Fibroblast_03_Myo_MKI67	ANGPTL2	ITGA5_ITGB1	0.00767733087159075	0	ANGPTL2_ITGA5_ITGB1	ANGPTL2 - (ITGA5+ITGB1)	ANGPTL	Secreted Signaling	PMID: 24478758
Fibroblast_03_Myo_MKI67	Fibroblast_03_Myo_MKI67	ANGPTL2	ITGA5_ITGB1	0.00368112458195648	0	ANGPTL2_ITGA5_ITGB1	ANGPTL2 - (ITGA5+ITGB1)	ANGPTL	Secreted Signaling	PMID: 24478758
Astrocyte_01_CAV1	Neurophil_01_GOS2	ANGPTL2	LILRB3	0.00860247650287884	0	ANGPTL2_PIRB	ANGPTL2 - PIRB	ANGPTL	Secreted Signaling	PMID: 24478758
Astrocyte_03_ROM1	Neurophil_01_GOS2	ANGPTL2	LILRB3	0.00334514578930909	0	ANGPTL2_PIRB	ANGPTL2 - PIRB	ANGPTL	Secreted Signaling	PMID: 24478758
Astrocyte_04_SCGB3A1	Neurophil_01_GOS2	ANGPTL2	LILRB3	0.00308649274245173	0	ANGPTL2_PIRB	ANGPTL2 - PIRB	ANGPTL	Secreted Signaling	PMID: 24478758
Astrocyte_05_HLA-DRB5	Neurophil_01_GOS2	ANGPTL2	LILRB3	0.00702320751758206	0	ANGPTL2_PIRB	ANGPTL2 - PIRB	ANGPTL	Secreted Signaling	PMID: 24478758
Astrocyte_06_CCL5	Neurophil_01_GOS2	ANGPTL2	LILRB3	0.00218680422349069	0	ANGPTL2_PIRB	ANGPTL2 - PIRB	ANGPTL	Secreted Signaling	PMID: 24478758
Endothelial_02_PTMAP2	Neurophil_01_GOS2	ANGPTL2	LILRB3	0.00863033893316502	0	ANGPTL2_PIRB	ANGPTL2 - PIRB	ANGPTL	Secreted Signaling	PMID: 24478758
Fibroblast_02_Myo_COL10A1	Neurophil_01_GOS2	ANGPTL2	LILRB3	0.00362575465112879	0	ANGPTL2_PIRB	ANGPTL2 - PIRB	ANGPTL	Secreted Signaling	PMID: 24478758
Fibroblast_03_Myo_MKI67	Neurophil_01_GOS2	ANGPTL2	LILRB3	0.00173478903458205	0	ANGPTL2_PIRB	ANGPTL2 - PIRB	ANGPTL	Secreted Signaling	PMID: 24478758
Astrocyte_05_HLA-DRB5	Endothelial_02_PTMAP2	ANGPTL4	ITGA5_ITGB1	0.00497252292756411	0	ANGPTL4_ITGA5_ITGB1	ANGPTL4 - (ITGA5+ITGB1)	ANGPTL	Secreted Signaling	PMID: 30049845
GE8	Endothelial_02_PTMAP2	ANGPTL4	ITGA5_ITGB1	0.00699130002282014	0	ANGPTL4_ITGA5_ITGB1	ANGPTL4 - (ITGA5+ITGB1)	ANGPTL	Secreted Signaling	PMID: 30049845
Astrocyte_05_HLA-DRB5	Fibroblast_02_Myo_COL10A1	ANGPTL4	ITGA5_ITGB1	0.00228528083873354	0	ANGPTL4_ITGA5_ITGB1	ANGPTL4 - (ITGA5+ITGB1)	ANGPTL	Secreted Signaling	PMID: 30049845
GE8	Fibroblast_02_Myo_COL10A1	ANGPTL4	ITGA5_ITGB1	0.0032166007661721	0	ANGPTL4_ITGA5_ITGB1	ANGPTL4 - (ITGA5+ITGB1)	ANGPTL	Secreted Signaling	PMID: 30049845
Astrocyte_05_HLA-DRB5	Fibroblast_03_Myo_MKI67	ANGPTL4	ITGA5_ITGB1	0.00307806885917979	0	ANGPTL4_ITGA5_ITGB1	ANGPTL4 - (ITGA5+ITGB1)	ANGPTL	Secreted Signaling	PMID: 30049845
GE8	Fibroblast_03_Myo_MKI67	ANGPTL4	ITGA5_ITGB1	0.00433107098198316	0	ANGPTL4_ITGA5_ITGB1	ANGPTL4 - (ITGA5+ITGB1)	ANGPTL	Secreted Signaling	PMID: 30049845
Astrocyte_05_HLA-DRB5	Endothelial_02_PTMAP2	ANGPTL4	CDH5	0.00546542720450519	0	ANGPTL4_CDH5	ANGPTL4 - CDH5	ANGPTL	Secreted Signaling	PMID: 30049845
GE8	Endothelial_02_PTMAP2	ANGPTL4	CDH5	0.00768277167213955	0	ANGPTL4_CDH5	ANGPTL4 - CDH5	ANGPTL	Secreted Signaling	PMID: 30049845
Astrocyte_05_HLA-DRB5	Fibroblast_01_Myo_HIGD1B	ANGPTL4	CDH11	0.00194460224216132	0	ANGPTL4_CDH11	ANGPTL4 - CDH11	ANGPTL	Secreted Signaling	PMID: 30049845
GE8	Fibroblast_01_Myo_HIGD1B	ANGPTL4	CDH11	0.00273746643776501	0	ANGPTL4_CDH11	ANGPTL4 - CDH11	ANGPTL	Secreted Signaling	PMID: 30049845
Astrocyte_05_HLA-DRB5	Fibroblast_02_Myo_COL10A1	ANGPTL4	CDH11	0.00378371146629852	0	ANGPTL4_CDH11	ANGPTL4 - CDH11	ANGPTL	Secreted Signaling	PMID: 30049845
GE8	Fibroblast_02_Myo_COL10A1	ANGPTL4	CDH11	0.00532242883917827	0	ANGPTL4_CDH11	ANGPTL4 - CDH11	ANGPTL	Secreted Signaling	PMID: 30049845
Astrocyte_05_HLA-DRB5	Fibroblast_03_Myo_MKI67	ANGPTL4	CDH11	0.00225656045044618	0	ANGPTL4_CDH11	ANGPTL4 - CDH11	ANGPTL	Secreted Signaling	PMID: 30049845
GE8	Fibroblast_03_Myo_MKI67	ANGPTL4	CDH11	0.00317621322610607	0	ANGPTL4_CDH11	ANGPTL4 - CDH11	ANGPTL	Secreted Signaling	PMID: 30049845
Astrocyte_05_HLA-DRB5	Fibroblast_02_Myo_COL10A1	ANGPTL4	SDC1	0.00045164726633252	0	ANGPTL4_SDC1	ANGPTL4 - SDC1	ANGPTL	Secreted Signaling	PMID: 29017031
GE8	Fibroblast_02_Myo_COL10A1	ANGPTL4	SDC1	0.000636183447070249	0	ANGPTL4_SDC1	ANGPTL4 - SDC1	ANGPTL	Secreted Signaling	PMID: 29017031
Astrocyte_05_HLA-DRB5	GE1	ANGPTL4	SDC1	0.00481225829738798	0	ANGPTL4_SDC1	ANGPTL4 - SDC1	ANGPTL	Secreted Signaling	PMID: 29017031
GE8	GE1	ANGPTL4	SDC1	0.00676641257770227	0	ANGPTL4_SDC1	ANGPTL4 - SDC1	ANGPTL	Secreted Signaling	PMID: 29017031
Astrocyte_05_HLA-DRB5	GE11	ANGPTL4	SDC1	0.00589547309452412	0	ANGPTL4_SDC1	ANGPTL4 - SDC1	ANGPTL	Secreted Signaling	PMID: 29017031
GE8	GE11	ANGPTL4	SDC1	0.00828583522021427	0	ANGPTL4_SDC1	ANGPTL4 - SDC1	ANGPTL	Secreted Signaling	PMID: 29017031
Astrocyte_05_HLA-DRB5	GE2	ANGPTL4	SDC1	0.00451537785524435	0	ANGPTL4_SDC1	ANGPTL4 - SDC1	ANGPTL	Secreted Signaling	PMID: 29017031
GE8	GE2	ANGPTL4	SDC1	0.00634974459871558	0	ANGPTL4_SDC1	ANGPTL4 - SDC1	ANGPTL	Secreted Signaling	PMID: 29017031
Astrocyte_05_HLA-DRB5	GE8	ANGPTL4	SDC1	0.00208711923741952	0	ANGPTL4_SDC1	ANGPTL4 - SDC1	ANGPTL	Secreted Signaling	PMID: 29017031
GE8	GE8	ANGPTL4	SDC1	0.00293792021746306	0	ANGPTL4_SDC1	ANGPTL4 - SDC1	ANGPTL	Secreted Signaling	PMID: 29017031
Astrocyte_05_HLA-DRB5	GE9	ANGPTL4	SDC1	0.00200282146575262	0	ANGPTL4_SDC1	ANGPTL4 - SDC1	ANGPTL	Secreted Signaling	PMID: 29017031
GE8	GE9	ANGPTL4	SDC1	0.00281935607683559	0	ANGPTL4_SDC1	ANGPTL4 - SDC1	ANGPTL	Secreted Signaling	PMID: 29017031
Astrocyte_05_HLA-DRB5	Fibroblast_01_Myo_HIGD1B	ANGPTL4	SDC2	0.00452649294828987	0	ANGPTL4_SDC2	ANGPTL4 - SDC2	ANGPTL	Secreted Signaling	PMID: 29017031
GE8	Fibroblast_01_Myo_HIGD1B	ANGPTL4	SDC2	0.00636534631169749	0	ANGPTL4_SDC2	ANGPTL4 - SDC2	ANGPTL	Secreted Signaling	PMID: 29017031
Astrocyte_05_HLA-DRB5	Fibroblast_02_Myo_COL10A1	ANGPTL4	SDC2	0.00216360052273733	0	ANGPTL4_SDC2	ANGPTL4 - SDC2	ANGPTL	Secreted Signaling	PMID: 29017031
GE8	Fibroblast_02_Myo_COL10A1	ANGPTL4	SDC2	0.00304548346790612	0	ANGPTL4_SDC2	ANGPTL4 - SDC2	ANGPTL	Secreted Signaling	PMID: 29017031
Astrocyte_05_HLA-DRB5	Fibroblast_03_Myo_MKI67	ANGPTL4	SDC2	0.00351423160768799	0	ANGPTL4_SDC2	ANGPTL4 - SDC2	ANGPTL	Secreted Signaling	PMID: 29017031
GE8	Fibroblast_03_Myo_MKI67	ANGPTL4	SDC2	0.00494390378738921	0	ANGPTL4_SDC2	ANGPTL4 - SDC2	ANGPTL	Secreted Signaling	PMID: 29017031
Astrocyte_05_HLA-DRB5	GE1	ANGPTL4	SDC2	0.00046553430435354	0	ANGPTL4_SDC2	ANGPTL4 - SDC2	ANGPTL	Secreted Signaling	PMID: 29017031
GE8	GE1	ANGPTL4	SDC2	0.000655740794530563	0	ANGPTL4_SDC2	ANGPTL4 - SDC2	ANGPTL	Secreted Signaling	PMID: 29017031
Astrocyte_05_HLA-DRB5	GE2	ANGPTL4	SDC2	0.000422493011781575	0	ANGPTL4_SDC2	ANGPTL4 - SDC2	ANGPTL	Secreted Signaling	PMID: 29017031
GE8	GE2	ANGPTL4	SDC2	0.000595124301327382	0	ANGPTL4_SDC2	ANGPTL4 - SDC2	ANGPTL	Secreted Signaling	PMID: 29017031
Astrocyte_05_HLA-DRB5	Astrocyte_05_HLA-DRB5	ANGPTL4	SDC3	0.00177037912653392	0	ANGPTL4_SDC3	ANGPTL4 - SDC3	ANGPTL	Secreted Signaling	PMID: 29017031
GE8	Astrocyte_05_HLA-DRB5	ANGPTL4	SDC3	0.00249238548278471	0	ANGPTL4_SDC3	ANGPTL4 - SDC3	ANGPTL	Secreted Signaling	PMID: 29017031
Astrocyte_05_HLA-DRB5	Endothelial_02_PTMAP2	ANGPTL4	SDC3	0.00037174378314257	0	ANGPTL4_SDC3	ANGPTL4 - SDC3	ANGPTL	Secreted Signaling	PMID: 29017031
GE8	Endothelial_02_PTMAP2	ANGPTL4	SDC3	0.000523649723499646	0	ANGPTL4_SDC3	ANGPTL4 - SDC3	ANGPTL	Secreted Signaling	PMID: 29017031
Astrocyte_05_HLA-DRB5	GE1	ANGPTL4	SDC3	0.000681386922004414	0	ANGPTL4_SDC3	ANGPTL4 - SDC3	ANGPTL	Secreted Signaling	PMID: 29017031
GE8	GE1	ANGPTL4	SDC3	0.000959701094106865	0	ANGPTL4_SDC3	ANGPTL4 - SDC3	ANGPTL	Secreted Signaling	PMID: 29017031
Astrocyte_05_HLA-DRB5	GE11	ANGPTL4	SDC3	0.000699292146101927	0	ANGPTL4_SDC3	ANGPTL4 - SDC3	ANGPTL	Secreted Signaling	PMID: 29017031
GE8	GE11	ANGPTL4	SDC3	0.000984912543230149	0	ANGPTL4_SDC3	ANGPTL4 - SDC3	ANGPTL	Secreted Signaling	PMID: 29017031
Astrocyte_05_HLA-DRB5	GE2	ANGPTL4	SDC3	0.000629937015417062	0	ANGPTL4_SDC3	ANGPTL4 - SDC3	ANGPTL	Secreted Signaling	PMID: 29017031
GE8	GE2	ANGPTL4	SDC3	0.000887255004270188	0	ANGPTL4_SDC3	ANGPTL4 - SDC3	ANGPTL	Secreted Signaling	PMID: 29017031
Astrocyte_05_HLA-DRB5	GE8	ANGPTL4	SDC3	0.000105317193027312	0	ANGPTL4_SDC3	ANGPTL4 - SDC3	ANGPTL	Secreted Signaling	PMID: 29017031
GE8	GE8	ANGPTL4	SDC3	0.000148369195420038	0	ANGPTL4_SDC3	ANGPTL4 - SDC3	ANGPTL	Secreted Signaling	PMID: 29017031
Astrocyte_05_HLA-DRB5	Astrocyte_05_HLA-DRB5	ANGPTL4	SDC4	0.000365258297686295	0	ANGPTL4_SDC4	ANGPTL4 - SDC4	ANGPTL	Secreted Signaling	PMID: 29017031
GE8	Astrocyte_05_HLA-DRB5	ANGPTL4	SDC4	0.000514515433326781	0	ANGPTL4_SDC4	ANGPTL4 - SDC4	ANGPTL	Secreted Signaling	PMID: 29017031
Astrocyte_05_HLA-DRB5	GE1	ANGPTL4	SDC4	0.00507498875228708	0	ANGPTL4_SDC4	ANGPTL4 - SDC4	ANGPTL	Secreted Signaling	PMID: 29017031
GE8	GE1	ANGPTL4	SDC4	0.00713506728710789	0	ANGPTL4_SDC4	ANGPTL4 - SDC4	ANGPTL	Secreted Signaling	PMID: 29017031
Astrocyte_05_HLA-DRB5	GE11	ANGPTL4	SDC4	0.00529873220699337	0	ANGPTL4_SDC4	ANGPTL4 - SDC4	ANGPTL	Secreted Signaling	PMID: 29017031
GE8	GE11	ANGPTL4	SDC4	0.00744895441648209	0	ANGPTL4_SDC4	ANGPTL4 - SDC4	ANGPTL	Secreted Signaling	PMID: 29017031
Astrocyte_05_HLA-DRB5	GE2	ANGPTL4	SDC4	0.0046679980457253	0	ANGPTL4_SDC4	ANGPTL4 - SDC4	ANGPTL	Secreted Signaling	PMID: 29017031
GE8	GE2	ANGPTL4	SDC4	0.006563957732371	0	ANGPTL4_SDC4	ANGPTL4 - SDC4	ANGPTL	Secreted Signaling	PMID: 29017031
Astrocyte_05_HLA-DRB5	GE8	ANGPTL4	SDC4	0.00628562007859675	0	ANGPTL4_SDC4	ANGPTL4 - SDC4	ANGPTL	Secreted Signaling	PMID: 29017031
GE8	GE8	ANGPTL4	SDC4	0.00883276459265388	0	ANGPTL4_SDC4	ANGPTL4 - SDC4	ANGPTL	Secreted Signaling	PMID: 29017031
Astrocyte_05_HLA-DRB5	GE9	ANGPTL4	SDC4	0.00593450807588721	0	ANGPTL4_SDC4	ANGPTL4 - SDC4	ANGPTL	Secreted Signaling	PMID: 29017031
GE8	GE9	ANGPTL4	SDC4	0.00834056442747246	0	ANGPTL4_SDC4	ANGPTL4 - SDC4	ANGPTL	Secreted Signaling	PMID: 29017031
Astrocyte_01_CAV1	Fibroblast_02_Myo_COL10A1	PTN	SDC1	0.00440084671467149	0	PTN_SDC1	PTN - SDC1	PTN	Secreted Signaling	PMID: 28356350; PMID: 25620911
Astrocyte_02_MALAT1	Fibroblast_02_Myo_COL10A1	PTN	SDC1	0.00165169788753164	0	PTN_SDC1	PTN - SDC1	PTN	Secreted Signaling	PMID: 28356350; PMID: 25620911
Astrocyte_03_ROM1	Fibroblast_02_Myo_COL10A1	PTN	SDC1	0.00702316167745552	0	PTN_SDC1	PTN - SDC1	PTN	Secreted Signaling	PMID: 28356350; PMID: 25620911
Astrocyte_04_SCGB3A1	Fibroblast_02_Myo_COL10A1	PTN	SDC1	0.00745385449579512	0	PTN_SDC1	PTN - SDC1	PTN	Secreted Signaling	PMID: 28356350; PMID: 25620911
Astrocyte_05_HLA-DRB5	Fibroblast_02_Myo_COL10A1	PTN	SDC1	0.00753731055815327	0	PTN_SDC1	PTN - SDC1	PTN	Secreted Signaling	PMID: 28356350; PMID: 25620911
Astrocyte_06_CCL5	Fibroblast_02_Myo_COL10A1	PTN	SDC1	0.00160306079740008	0	PTN_SDC1	PTN - SDC1	PTN	Secreted Signaling	PMID: 28356350; PMID: 25620911
Fibroblast_01_Myo_HIGD1B	Fibroblast_02_Myo_COL10A1	PTN	SDC1	0.00138333645171812	0	PTN_SDC1	PTN - SDC1	PTN	Secreted Signaling	PMID: 28356350; PMID: 25620911
Fibroblast_03_Myo_MKI67	Fibroblast_02_Myo_COL10A1	PTN	SDC1	0.00247441060458449	0	PTN_SDC1	PTN - SDC1	PTN	Secreted Signaling	PMID: 28356350; PMID: 25620911
GE1	Fibroblast_02_Myo_COL10A1	PTN	SDC1	0.000608015022171645	0	PTN_SDC1	PTN - SDC1	PTN	Secreted Signaling	PMID: 28356350; PMID: 25620911
GE11	Fibroblast_02_Myo_COL10A1	PTN	SDC1	0.000860544052987087	0	PTN_SDC1	PTN - SDC1	PTN	Secreted Signaling	PMID: 28356350; PMID: 25620911
GE2	Fibroblast_02_Myo_COL10A1	PTN	SDC1	0.00076796490701617	0	PTN_SDC1	PTN - SDC1	PTN	Secreted Signaling	PMID: 28356350; PMID: 25620911
Astrocyte_01_CAV1	GE1	PTN	SDC1	0.0451676188572987	0	PTN_SDC1	PTN - SDC1	PTN	Secreted Signaling	PMID: 28356350; PMID: 25620911
Astrocyte_02_MALAT1	GE1	PTN	SDC1	0.0173970230602506	0	PTN_SDC1	PTN - SDC1	PTN	Secreted Signaling	PMID: 28356350; PMID: 25620911
Astrocyte_03_ROM1	GE1	PTN	SDC1	0.0703646469259607	0	PTN_SDC1	PTN - SDC1	PTN	Secreted Signaling	PMID: 28356350; PMID: 25620911
Astrocyte_04_SCGB3A1	GE1	PTN	SDC1	0.0743887342949692	0	PTN_SDC1	PTN - SDC1	PTN	Secreted Signaling	PMID: 28356350; PMID: 25620911
Astrocyte_05_HLA-DRB5	GE1	PTN	SDC1	0.075164863955128	0	PTN_SDC1	PTN - SDC1	PTN	Secreted Signaling	PMID: 28356350; PMID: 25620911
Astrocyte_06_CCL5	GE1	PTN	SDC1	0.016892582915617	0	PTN_SDC1	PTN - SDC1	PTN	Secreted Signaling	PMID: 28356350; PMID: 25620911
Fibroblast_01_Myo_HIGD1B	GE1	PTN	SDC1	0.0146078547641495	0	PTN_SDC1	PTN - SDC1	PTN	Secreted Signaling	PMID: 28356350; PMID: 25620911
Fibroblast_03_Myo_MKI67	GE1	PTN	SDC1	0.0258593568985052	0	PTN_SDC1	PTN - SDC1	PTN	Secreted Signaling	PMID: 28356350; PMID: 25620911
GE1	GE1	PTN	SDC1	0.00646857161922434	0	PTN_SDC1	PTN - SDC1	PTN	Secreted Signaling	PMID: 28356350; PMID: 25620911
GE11	GE1	PTN	SDC1	0.00913294247157225	0	PTN_SDC1	PTN - SDC1	PTN	Secreted Signaling	PMID: 28356350; PMID: 25620911
GE2	GE1	PTN	SDC1	0.00815766750706833	0	PTN_SDC1	PTN - SDC1	PTN	Secreted Signaling	PMID: 28356350; PMID: 25620911
Astrocyte_01_CAV1	GE11	PTN	SDC1	0.0548341095880229	0	PTN_SDC1	PTN - SDC1	PTN	Secreted Signaling	PMID: 28356350; PMID: 25620911
Astrocyte_02_MALAT1	GE11	PTN	SDC1	0.0212525097054123	0	PTN_SDC1	PTN - SDC1	PTN	Secreted Signaling	PMID: 28356350; PMID: 25620911
Astrocyte_03_ROM1	GE11	PTN	SDC1	0.0849439185413313	0	PTN_SDC1	PTN - SDC1	PTN	Secreted Signaling	PMID: 28356350; PMID: 25620911
Astrocyte_04_SCGB3A1	GE11	PTN	SDC1	0.0897213110429235	0	PTN_SDC1	PTN - SDC1	PTN	Secreted Signaling	PMID: 28356350; PMID: 25620911
Astrocyte_05_HLA-DRB5	GE11	PTN	SDC1	0.0906417466564101	0	PTN_SDC1	PTN - SDC1	PTN	Secreted Signaling	PMID: 28356350; PMID: 25620911
Astrocyte_06_CCL5	GE11	PTN	SDC1	0.0206386248422974	0	PTN_SDC1	PTN - SDC1	PTN	Secreted Signaling	PMID: 28356350; PMID: 25620911
Fibroblast_01_Myo_HIGD1B	GE11	PTN	SDC1	0.0178564456061619	0	PTN_SDC1	PTN - SDC1	PTN	Secreted Signaling	PMID: 28356350; PMID: 25620911
Fibroblast_03_Myo_MKI67	GE11	PTN	SDC1	0.031530067247452	0	PTN_SDC1	PTN - SDC1	PTN	Secreted Signaling	PMID: 28356350; PMID: 25620911
GE1	GE11	PTN	SDC1	0.00792164640649699	0	PTN_SDC1	PTN - SDC1	PTN	Secreted Signaling	PMID: 28356350; PMID: 25620911
GE11	GE11	PTN	SDC1	0.0111777975472822	0	PTN_SDC1	PTN - SDC1	PTN	Secreted Signaling	PMID: 28356350; PMID: 25620911
GE2	GE11	PTN	SDC1	0.00998636041562283	0	PTN_SDC1	PTN - SDC1	PTN	Secreted Signaling	PMID: 28356350; PMID: 25620911
Astrocyte_01_CAV1	GE2	PTN	SDC1	0.042487402860728	0	PTN_SDC1	PTN - SDC1	PTN	Secreted Signaling	PMID: 28356350; PMID: 25620911
Astrocyte_02_MALAT1	GE2	PTN	SDC1	0.0163365012663021	0	PTN_SDC1	PTN - SDC1	PTN	Secreted Signaling	PMID: 28356350; PMID: 25620911
Astrocyte_03_ROM1	GE2	PTN	SDC1	0.0662930647927839	0	PTN_SDC1	PTN - SDC1	PTN	Secreted Signaling	PMID: 28356350; PMID: 25620911
Astrocyte_04_SCGB3A1	GE2	PTN	SDC1	0.0701018609703677	0	PTN_SDC1	PTN - SDC1	PTN	Secreted Signaling	PMID: 28356350; PMID: 25620911
Astrocyte_05_HLA-DRB5	GE2	PTN	SDC1	0.0708366867621998	0	PTN_SDC1	PTN - SDC1	PTN	Secreted Signaling	PMID: 28356350; PMID: 25620911
Astrocyte_06_CCL5	GE2	PTN	SDC1	0.0158623153590567	0	PTN_SDC1	PTN - SDC1	PTN	Secreted Signaling	PMID: 28356350; PMID: 25620911
Fibroblast_01_Myo_HIGD1B	GE2	PTN	SDC1	0.0137149873392297	0	PTN_SDC1	PTN - SDC1	PTN	Secreted Signaling	PMID: 28356350; PMID: 25620911
Fibroblast_03_Myo_MKI67	GE2	PTN	SDC1	0.0242957267709323	0	PTN_SDC1	PTN - SDC1	PTN	Secreted Signaling	PMID: 28356350; PMID: 25620911
GE1	GE2	PTN	SDC1	0.00607013225823622	0	PTN_SDC1	PTN - SDC1	PTN	Secreted Signaling	PMID: 28356350; PMID: 25620911
GE11	GE2	PTN	SDC1	0.00857180394096964	0	PTN_SDC1	PTN - SDC1	PTN	Secreted Signaling	PMID: 28356350; PMID: 25620911
GE2	GE2	PTN	SDC1	0.00765598800563107	0	PTN_SDC1	PTN - SDC1	PTN	Secreted Signaling	PMID: 28356350; PMID: 25620911
Astrocyte_01_CAV1	GE8	PTN	SDC1	0.0200500143949867	0	PTN_SDC1	PTN - SDC1	PTN	Secreted Signaling	PMID: 28356350; PMID: 25620911
Astrocyte_02_MALAT1	GE8	PTN	SDC1	0.00759966565587543	0	PTN_SDC1	PTN - SDC1	PTN	Secreted Signaling	PMID: 28356350; PMID: 25620911
Astrocyte_03_ROM1	GE8	PTN	SDC1	0.0317002312540254	0	PTN_SDC1	PTN - SDC1	PTN	Secreted Signaling	PMID: 28356350; PMID: 25620911
Astrocyte_04_SCGB3A1	GE8	PTN	SDC1	0.0335930400094413	0	PTN_SDC1	PTN - SDC1	PTN	Secreted Signaling	PMID: 28356350; PMID: 25620911
Astrocyte_05_HLA-DRB5	GE8	PTN	SDC1	0.0339591466364685	0	PTN_SDC1	PTN - SDC1	PTN	Secreted Signaling	PMID: 28356350; PMID: 25620911
Astrocyte_06_CCL5	GE8	PTN	SDC1	0.00737717464285431	0	PTN_SDC1	PTN - SDC1	PTN	Secreted Signaling	PMID: 28356350; PMID: 25620911
Fibroblast_01_Myo_HIGD1B	GE8	PTN	SDC1	0.00637106880127852	0	PTN_SDC1	PTN - SDC1	PTN	Secreted Signaling	PMID: 28356350; PMID: 25620911
Fibroblast_03_Myo_MKI67	GE8	PTN	SDC1	0.0113513820529668	0	PTN_SDC1	PTN - SDC1	PTN	Secreted Signaling	PMID: 28356350; PMID: 25620911
GE1	GE8	PTN	SDC1	0.00280812369236794	0	PTN_SDC1	PTN - SDC1	PTN	Secreted Signaling	PMID: 28356350; PMID: 25620911
GE11	GE8	PTN	SDC1	0.00397080100123451	0	PTN_SDC1	PTN - SDC1	PTN	Secreted Signaling	PMID: 28356350; PMID: 25620911
GE2	GE8	PTN	SDC1	0.0035448009868915	0	PTN_SDC1	PTN - SDC1	PTN	Secreted Signaling	PMID: 28356350; PMID: 25620911
Astrocyte_01_CAV1	GE9	PTN	SDC1	0.019254202062788	0	PTN_SDC1	PTN - SDC1	PTN	Secreted Signaling	PMID: 28356350; PMID: 25620911
Astrocyte_02_MALAT1	GE9	PTN	SDC1	0.0072943461847049	0	PTN_SDC1	PTN - SDC1	PTN	Secreted Signaling	PMID: 28356350; PMID: 25620911
Astrocyte_03_ROM1	GE9	PTN	SDC1	0.0304563775481177	0	PTN_SDC1	PTN - SDC1	PTN	Secreted Signaling	PMID: 28356350; PMID: 25620911
Astrocyte_04_SCGB3A1	GE9	PTN	SDC1	0.0322773919956337	0	PTN_SDC1	PTN - SDC1	PTN	Secreted Signaling	PMID: 28356350; PMID: 25620911
Astrocyte_05_HLA-DRB5	GE9	PTN	SDC1	0.0326296444285646	0	PTN_SDC1	PTN - SDC1	PTN	Secreted Signaling	PMID: 28356350; PMID: 25620911
Astrocyte_06_CCL5	GE9	PTN	SDC1	0.00708073005620224	0	PTN_SDC1	PTN - SDC1	PTN	Secreted Signaling	PMID: 28356350; PMID: 25620911
Fibroblast_01_Myo_HIGD1B	GE9	PTN	SDC1	0.0061148045440429	0	PTN_SDC1	PTN - SDC1	PTN	Secreted Signaling	PMID: 28356350; PMID: 25620911
Fibroblast_03_Myo_MKI67	GE9	PTN	SDC1	0.0108969909868219	0	PTN_SDC1	PTN - SDC1	PTN	Secreted Signaling	PMID: 28356350; PMID: 25620911
GE1	GE9	PTN	SDC1	0.00269478352636302	0	PTN_SDC1	PTN - SDC1	PTN	Secreted Signaling	PMID: 28356350; PMID: 25620911
GE11	GE9	PTN	SDC1	0.00381071273179649	0	PTN_SDC1	PTN - SDC1	PTN	Secreted Signaling	PMID: 28356350; PMID: 25620911
GE2	GE9	PTN	SDC1	0.00340182883170641	0	PTN_SDC1	PTN - SDC1	PTN	Secreted Signaling	PMID: 28356350; PMID: 25620911
Astrocyte_01_CAV1	Fibroblast_01_Myo_HIGD1B	PTN	SDC2	0.0425879913654972	0	PTN_SDC2	PTN - SDC2	PTN	Secreted Signaling	PMID: 28356350; PMID: 25620911
Astrocyte_02_MALAT1	Fibroblast_01_Myo_HIGD1B	PTN	SDC2	0.0163762366453683	0	PTN_SDC2	PTN - SDC2	PTN	Secreted Signaling	PMID: 28356350; PMID: 25620911
Astrocyte_03_ROM1	Fibroblast_01_Myo_HIGD1B	PTN	SDC2	0.0664461019153499	0	PTN_SDC2	PTN - SDC2	PTN	Secreted Signaling	PMID: 28356350; PMID: 25620911
Astrocyte_04_SCGB3A1	Fibroblast_01_Myo_HIGD1B	PTN	SDC2	0.0702630290182288	0	PTN_SDC2	PTN - SDC2	PTN	Secreted Signaling	PMID: 28356350; PMID: 25620911
Astrocyte_05_HLA-DRB5	Fibroblast_01_Myo_HIGD1B	PTN	SDC2	0.0709994152259667	0	PTN_SDC2	PTN - SDC2	PTN	Secreted Signaling	PMID: 28356350; PMID: 25620911
Astrocyte_06_CCL5	Fibroblast_01_Myo_HIGD1B	PTN	SDC2	0.0159009160167818	0	PTN_SDC2	PTN - SDC2	PTN	Secreted Signaling	PMID: 28356350; PMID: 25620911
Fibroblast_01_Myo_HIGD1B	Fibroblast_01_Myo_HIGD1B	PTN	SDC2	0.0137484355132108	0	PTN_SDC2	PTN - SDC2	PTN	Secreted Signaling	PMID: 28356350; PMID: 25620911
Fibroblast_03_Myo_MKI67	Fibroblast_01_Myo_HIGD1B	PTN	SDC2	0.0243543421136098	0	PTN_SDC2	PTN - SDC2	PTN	Secreted Signaling	PMID: 28356350; PMID: 25620911
GE1	Fibroblast_01_Myo_HIGD1B	PTN	SDC2	0.00608505115379748	0	PTN_SDC2	PTN - SDC2	PTN	Secreted Signaling	PMID: 28356350; PMID: 25620911
GE11	Fibroblast_01_Myo_HIGD1B	PTN	SDC2	0.0085928181760883	0	PTN_SDC2	PTN - SDC2	PTN	Secreted Signaling	PMID: 28356350; PMID: 25620911
GE2	Fibroblast_01_Myo_HIGD1B	PTN	SDC2	0.00767477444924278	0	PTN_SDC2	PTN - SDC2	PTN	Secreted Signaling	PMID: 28356350; PMID: 25620911
Astrocyte_01_CAV1	Fibroblast_02_Myo_COL10A1	PTN	SDC2	0.0207710347321293	0	PTN_SDC2	PTN - SDC2	PTN	Secreted Signaling	PMID: 28356350; PMID: 25620911
Astrocyte_02_MALAT1	Fibroblast_02_Myo_COL10A1	PTN	SDC2	0.00787655661305409	0	PTN_SDC2	PTN - SDC2	PTN	Secreted Signaling	PMID: 28356350; PMID: 25620911
Astrocyte_03_ROM1	Fibroblast_02_Myo_COL10A1	PTN	SDC2	0.0328261720130937	0	PTN_SDC2	PTN - SDC2	PTN	Secreted Signaling	PMID: 28356350; PMID: 25620911
Astrocyte_04_SCGB3A1	Fibroblast_02_Myo_COL10A1	PTN	SDC2	0.0347837952083712	0	PTN_SDC2	PTN - SDC2	PTN	Secreted Signaling	PMID: 28356350; PMID: 25620911
Astrocyte_05_HLA-DRB5	Fibroblast_02_Myo_COL10A1	PTN	SDC2	0.0351624068575665	0	PTN_SDC2	PTN - SDC2	PTN	Secreted Signaling	PMID: 28356350; PMID: 25620911
Astrocyte_06_CCL5	Fibroblast_02_Myo_COL10A1	PTN	SDC2	0.00764602167990817	0	PTN_SDC2	PTN - SDC2	PTN	Secreted Signaling	PMID: 28356350; PMID: 25620911
Fibroblast_01_Myo_HIGD1B	Fibroblast_02_Myo_COL10A1	PTN	SDC2	0.00660349415348129	0	PTN_SDC2	PTN - SDC2	PTN	Secreted Signaling	PMID: 28356350; PMID: 25620911
Fibroblast_03_Myo_MKI67	Fibroblast_02_Myo_COL10A1	PTN	SDC2	0.0117633451115811	0	PTN_SDC2	PTN - SDC2	PTN	Secreted Signaling	PMID: 28356350; PMID: 25620911
GE1	Fibroblast_02_Myo_COL10A1	PTN	SDC2	0.00291094870125891	0	PTN_SDC2	PTN - SDC2	PTN	Secreted Signaling	PMID: 28356350; PMID: 25620911
GE11	Fibroblast_02_Myo_COL10A1	PTN	SDC2	0.00411602401384418	0	PTN_SDC2	PTN - SDC2	PTN	Secreted Signaling	PMID: 28356350; PMID: 25620911
GE2	Fibroblast_02_Myo_COL10A1	PTN	SDC2	0.00367450149506761	0	PTN_SDC2	PTN - SDC2	PTN	Secreted Signaling	PMID: 28356350; PMID: 25620911
Astrocyte_01_CAV1	Fibroblast_03_Myo_MKI67	PTN	SDC2	0.0333491717661479	0	PTN_SDC2	PTN - SDC2	PTN	Secreted Signaling	PMID: 28356350; PMID: 25620911
Astrocyte_02_MALAT1	Fibroblast_03_Myo_MKI67	PTN	SDC2	0.0127479478058241	0	PTN_SDC2	PTN - SDC2	PTN	Secreted Signaling	PMID: 28356350; PMID: 25620911
Astrocyte_03_ROM1	Fibroblast_03_Myo_MKI67	PTN	SDC2	0.0523144322486628	0	PTN_SDC2	PTN - SDC2	PTN	Secreted Signaling	PMID: 28356350; PMID: 25620911
Astrocyte_04_SCGB3A1	Fibroblast_03_Myo_MKI67	PTN	SDC2	0.0553677257454143	0	PTN_SDC2	PTN - SDC2	PTN	Secreted Signaling	PMID: 28356350; PMID: 25620911
Astrocyte_05_HLA-DRB5	Fibroblast_03_Myo_MKI67	PTN	SDC2	0.0559573985084898	0	PTN_SDC2	PTN - SDC2	PTN	Secreted Signaling	PMID: 28356350; PMID: 25620911
Astrocyte_06_CCL5	Fibroblast_03_Myo_MKI67	PTN	SDC2	0.0123766132449381	0	PTN_SDC2	PTN - SDC2	PTN	Secreted Signaling	PMID: 28356350; PMID: 25620911
Fibroblast_01_Myo_HIGD1B	Fibroblast_03_Myo_MKI67	PTN	SDC2	0.0106960264340678	0	PTN_SDC2	PTN - SDC2	PTN	Secreted Signaling	PMID: 28356350; PMID: 25620911
Fibroblast_03_Myo_MKI67	Fibroblast_03_Myo_MKI67	PTN	SDC2	0.0189925693825996	0	PTN_SDC2	PTN - SDC2	PTN	Secreted Signaling	PMID: 28356350; PMID: 25620911
GE1	Fibroblast_03_Myo_MKI67	PTN	SDC2	0.00472590350936026	0	PTN_SDC2	PTN - SDC2	PTN	Secreted Signaling	PMID: 28356350; PMID: 25620911
GE11	Fibroblast_03_Myo_MKI67	PTN	SDC2	0.00667730261821613	0	PTN_SDC2	PTN - SDC2	PTN	Secreted Signaling	PMID: 28356350; PMID: 25620911
GE2	Fibroblast_03_Myo_MKI67	PTN	SDC2	0.00596267883958604	0	PTN_SDC2	PTN - SDC2	PTN	Secreted Signaling	PMID: 28356350; PMID: 25620911
Astrocyte_01_CAV1	GE1	PTN	SDC2	0.00453561088291368	0	PTN_SDC2	PTN - SDC2	PTN	Secreted Signaling	PMID: 28356350; PMID: 25620911
Astrocyte_02_MALAT1	GE1	PTN	SDC2	0.00170242067311694	0	PTN_SDC2	PTN - SDC2	PTN	Secreted Signaling	PMID: 28356350; PMID: 25620911
Astrocyte_03_ROM1	GE1	PTN	SDC2	0.00723764347076664	0	PTN_SDC2	PTN - SDC2	PTN	Secreted Signaling	PMID: 28356350; PMID: 25620911
Astrocyte_04_SCGB3A1	GE1	PTN	SDC2	0.00768138755853123	0	PTN_SDC2	PTN - SDC2	PTN	Secreted Signaling	PMID: 28356350; PMID: 25620911
Astrocyte_05_HLA-DRB5	GE1	PTN	SDC2	0.00776737122739223	0	PTN_SDC2	PTN - SDC2	PTN	Secreted Signaling	PMID: 28356350; PMID: 25620911
Astrocyte_06_CCL5	GE1	PTN	SDC2	0.00165229243514944	0	PTN_SDC2	PTN - SDC2	PTN	Secreted Signaling	PMID: 28356350; PMID: 25620911
Fibroblast_01_Myo_HIGD1B	GE1	PTN	SDC2	0.00142582976682362	0	PTN_SDC2	PTN - SDC2	PTN	Secreted Signaling	PMID: 28356350; PMID: 25620911
Fibroblast_03_Myo_MKI67	GE1	PTN	SDC2	0.0025503339300712	0	PTN_SDC2	PTN - SDC2	PTN	Secreted Signaling	PMID: 28356350; PMID: 25620911
GE1	GE1	PTN	SDC2	0.000626706967988393	0	PTN_SDC2	PTN - SDC2	PTN	Secreted Signaling	PMID: 28356350; PMID: 25620911
GE11	GE1	PTN	SDC2	0.000886992500547505	0	PTN_SDC2	PTN - SDC2	PTN	Secreted Signaling	PMID: 28356350; PMID: 25620911
GE2	GE1	PTN	SDC2	0.000791570229008847	0	PTN_SDC2	PTN - SDC2	PTN	Secreted Signaling	PMID: 28356350; PMID: 25620911
Astrocyte_01_CAV1	GE2	PTN	SDC2	0.00411781813973698	0	PTN_SDC2	PTN - SDC2	PTN	Secreted Signaling	PMID: 28356350; PMID: 25620911
Astrocyte_02_MALAT1	GE2	PTN	SDC2	0.00154519899208352	0	PTN_SDC2	PTN - SDC2	PTN	Secreted Signaling	PMID: 28356350; PMID: 25620911
Astrocyte_03_ROM1	GE2	PTN	SDC2	0.00657259934502915	0	PTN_SDC2	PTN - SDC2	PTN	Secreted Signaling	PMID: 28356350; PMID: 25620911
Astrocyte_04_SCGB3A1	GE2	PTN	SDC2	0.00697585570344273	0	PTN_SDC2	PTN - SDC2	PTN	Secreted Signaling	PMID: 28356350; PMID: 25620911
Astrocyte_05_HLA-DRB5	GE2	PTN	SDC2	0.00705399795313693	0	PTN_SDC2	PTN - SDC2	PTN	Secreted Signaling	PMID: 28356350; PMID: 25620911
Astrocyte_06_CCL5	GE2	PTN	SDC2	0.00149969323453916	0	PTN_SDC2	PTN - SDC2	PTN	Secreted Signaling	PMID: 28356350; PMID: 25620911
Fibroblast_01_Myo_HIGD1B	GE2	PTN	SDC2	0.00129411865189534	0	PTN_SDC2	PTN - SDC2	PTN	Secreted Signaling	PMID: 28356350; PMID: 25620911
Fibroblast_03_Myo_MKI67	GE2	PTN	SDC2	0.00231498748724453	0	PTN_SDC2	PTN - SDC2	PTN	Secreted Signaling	PMID: 28356350; PMID: 25620911
GE1	GE2	PTN	SDC2	0.000568772825963378	0	PTN_SDC2	PTN - SDC2	PTN	Secreted Signaling	PMID: 28356350; PMID: 25620911
GE11	GE2	PTN	SDC2	0.00080501638517913	0	PTN_SDC2	PTN - SDC2	PTN	Secreted Signaling	PMID: 28356350; PMID: 25620911
GE2	GE2	PTN	SDC2	0.000718406727636348	0	PTN_SDC2	PTN - SDC2	PTN	Secreted Signaling	PMID: 28356350; PMID: 25620911
Astrocyte_01_CAV1	Astrocyte_05_HLA-DRB5	PTN	SDC3	0.0170538214437321	0	PTN_SDC3	PTN - SDC3	PTN	Secreted Signaling	PMID: 28356350; PMID: 25620911
Astrocyte_02_MALAT1	Astrocyte_05_HLA-DRB5	PTN	SDC3	0.006451753121487	0	PTN_SDC3	PTN - SDC3	PTN	Secreted Signaling	PMID: 28356350; PMID: 25620911
Astrocyte_03_ROM1	Astrocyte_05_HLA-DRB5	PTN	SDC3	0.0270110644403828	0	PTN_SDC3	PTN - SDC3	PTN	Secreted Signaling	PMID: 28356350; PMID: 25620911
Astrocyte_04_SCGB3A1	Astrocyte_05_HLA-DRB5	PTN	SDC3	0.0286321639511838	0	PTN_SDC3	PTN - SDC3	PTN	Secreted Signaling	PMID: 28356350; PMID: 25620911
Astrocyte_05_HLA-DRB5	Astrocyte_05_HLA-DRB5	PTN	SDC3	0.0289458248786393	0	PTN_SDC3	PTN - SDC3	PTN	Secreted Signaling	PMID: 28356350; PMID: 25620911
Astrocyte_06_CCL5	Astrocyte_05_HLA-DRB5	PTN	SDC3	0.0062626567999639	0	PTN_SDC3	PTN - SDC3	PTN	Secreted Signaling	PMID: 28356350; PMID: 25620911
Fibroblast_01_Myo_HIGD1B	Astrocyte_05_HLA-DRB5	PTN	SDC3	0.0054077218466566	0	PTN_SDC3	PTN - SDC3	PTN	Secreted Signaling	PMID: 28356350; PMID: 25620911
Fibroblast_03_Myo_MKI67	Astrocyte_05_HLA-DRB5	PTN	SDC3	0.0096422871469027	0	PTN_SDC3	PTN - SDC3	PTN	Secreted Signaling	PMID: 28356350; PMID: 25620911
GE1	Astrocyte_05_HLA-DRB5	PTN	SDC3	0.00238222553349421	0	PTN_SDC3	PTN - SDC3	PTN	Secreted Signaling	PMID: 28356350; PMID: 25620911
GE11	Astrocyte_05_HLA-DRB5	PTN	SDC3	0.00336915948715261	0	PTN_SDC3	PTN - SDC3	PTN	Secreted Signaling	PMID: 28356350; PMID: 25620911
GE2	Astrocyte_05_HLA-DRB5	PTN	SDC3	0.00300751056915717	0	PTN_SDC3	PTN - SDC3	PTN	Secreted Signaling	PMID: 28356350; PMID: 25620911
Astrocyte_01_CAV1	Endothelial_02_PTMAP2	PTN	SDC3	0.00362480162981609	0	PTN_SDC3	PTN - SDC3	PTN	Secreted Signaling	PMID: 28356350; PMID: 25620911
Astrocyte_02_MALAT1	Endothelial_02_PTMAP2	PTN	SDC3	0.00135977545414157	0	PTN_SDC3	PTN - SDC3	PTN	Secreted Signaling	PMID: 28356350; PMID: 25620911
Astrocyte_03_ROM1	Endothelial_02_PTMAP2	PTN	SDC3	0.00578738573207637	0	PTN_SDC3	PTN - SDC3	PTN	Secreted Signaling	PMID: 28356350; PMID: 25620911
Astrocyte_04_SCGB3A1	Endothelial_02_PTMAP2	PTN	SDC3	0.00614276385578251	0	PTN_SDC3	PTN - SDC3	PTN	Secreted Signaling	PMID: 28356350; PMID: 25620911
Astrocyte_05_HLA-DRB5	Endothelial_02_PTMAP2	PTN	SDC3	0.00621163233921403	0	PTN_SDC3	PTN - SDC3	PTN	Secreted Signaling	PMID: 28356350; PMID: 25620911
Astrocyte_06_CCL5	Endothelial_02_PTMAP2	PTN	SDC3	0.00131972315971714	0	PTN_SDC3	PTN - SDC3	PTN	Secreted Signaling	PMID: 28356350; PMID: 25620911
Fibroblast_01_Myo_HIGD1B	Endothelial_02_PTMAP2	PTN	SDC3	0.00113879033496867	0	PTN_SDC3	PTN - SDC3	PTN	Secreted Signaling	PMID: 28356350; PMID: 25620911
Fibroblast_03_Myo_MKI67	Endothelial_02_PTMAP2	PTN	SDC3	0.00203737799274633	0	PTN_SDC3	PTN - SDC3	PTN	Secreted Signaling	PMID: 28356350; PMID: 25620911
GE1	Endothelial_02_PTMAP2	PTN	SDC3	0.000500461482121907	0	PTN_SDC3	PTN - SDC3	PTN	Secreted Signaling	PMID: 28356350; PMID: 25620911
GE11	Endothelial_02_PTMAP2	PTN	SDC3	0.000708351582271284	0	PTN_SDC3	PTN - SDC3	PTN	Secreted Signaling	PMID: 28356350; PMID: 25620911
GE2	Endothelial_02_PTMAP2	PTN	SDC3	0.000632135264619954	0	PTN_SDC3	PTN - SDC3	PTN	Secreted Signaling	PMID: 28356350; PMID: 25620911
Astrocyte_01_CAV1	GE1	PTN	SDC3	0.00662611093806541	0	PTN_SDC3	PTN - SDC3	PTN	Secreted Signaling	PMID: 28356350; PMID: 25620911
Astrocyte_02_MALAT1	GE1	PTN	SDC3	0.00249034706183604	0	PTN_SDC3	PTN - SDC3	PTN	Secreted Signaling	PMID: 28356350; PMID: 25620911
Astrocyte_03_ROM1	GE1	PTN	SDC3	0.0105603207588192	0	PTN_SDC3	PTN - SDC3	PTN	Secreted Signaling	PMID: 28356350; PMID: 25620911
Astrocyte_04_SCGB3A1	GE1	PTN	SDC3	0.0112054807345082	0	PTN_SDC3	PTN - SDC3	PTN	Secreted Signaling	PMID: 28356350; PMID: 25620911
Astrocyte_05_HLA-DRB5	GE1	PTN	SDC3	0.0113304618615759	0	PTN_SDC3	PTN - SDC3	PTN	Secreted Signaling	PMID: 28356350; PMID: 25620911
Astrocyte_06_CCL5	GE1	PTN	SDC3	0.0024170742913357	0	PTN_SDC3	PTN - SDC3	PTN	Secreted Signaling	PMID: 28356350; PMID: 25620911
Fibroblast_01_Myo_HIGD1B	GE1	PTN	SDC3	0.00208600988744384	0	PTN_SDC3	PTN - SDC3	PTN	Secreted Signaling	PMID: 28356350; PMID: 25620911
Fibroblast_03_Myo_MKI67	GE1	PTN	SDC3	0.00372923155045181	0	PTN_SDC3	PTN - SDC3	PTN	Secreted Signaling	PMID: 28356350; PMID: 25620911
GE1	GE1	PTN	SDC3	0.000917221359093835	0	PTN_SDC3	PTN - SDC3	PTN	Secreted Signaling	PMID: 28356350; PMID: 25620911
GE11	GE1	PTN	SDC3	0.00129800735564672	0	PTN_SDC3	PTN - SDC3	PTN	Secreted Signaling	PMID: 28356350; PMID: 25620911
GE2	GE1	PTN	SDC3	0.00115841954993548	0	PTN_SDC3	PTN - SDC3	PTN	Secreted Signaling	PMID: 28356350; PMID: 25620911
Astrocyte_01_CAV1	GE11	PTN	SDC3	0.00679916649534155	0	PTN_SDC3	PTN - SDC3	PTN	Secreted Signaling	PMID: 28356350; PMID: 25620911
Astrocyte_02_MALAT1	GE11	PTN	SDC3	0.00255566587959282	0	PTN_SDC3	PTN - SDC3	PTN	Secreted Signaling	PMID: 28356350; PMID: 25620911
Astrocyte_03_ROM1	GE11	PTN	SDC3	0.0108350061863949	0	PTN_SDC3	PTN - SDC3	PTN	Secreted Signaling	PMID: 28356350; PMID: 25620911
Astrocyte_04_SCGB3A1	GE11	PTN	SDC3	0.0114967524849292	0	PTN_SDC3	PTN - SDC3	PTN	Secreted Signaling	PMID: 28356350; PMID: 25620911
Astrocyte_05_HLA-DRB5	GE11	PTN	SDC3	0.0116249441380252	0	PTN_SDC3	PTN - SDC3	PTN	Secreted Signaling	PMID: 28356350; PMID: 25620911
Astrocyte_06_CCL5	GE11	PTN	SDC3	0.00248047603119038	0	PTN_SDC3	PTN - SDC3	PTN	Secreted Signaling	PMID: 28356350; PMID: 25620911
Fibroblast_01_Myo_HIGD1B	GE11	PTN	SDC3	0.00214074618576713	0	PTN_SDC3	PTN - SDC3	PTN	Secreted Signaling	PMID: 28356350; PMID: 25620911
Fibroblast_03_Myo_MKI67	GE11	PTN	SDC3	0.00382692015890606	0	PTN_SDC3	PTN - SDC3	PTN	Secreted Signaling	PMID: 28356350; PMID: 25620911
GE1	GE11	PTN	SDC3	0.000941317912560961	0	PTN_SDC3	PTN - SDC3	PTN	Secreted Signaling	PMID: 28356350; PMID: 25620911
GE11	GE11	PTN	SDC3	0.00133209429584956	0	PTN_SDC3	PTN - SDC3	PTN	Secreted Signaling	PMID: 28356350; PMID: 25620911
GE2	GE11	PTN	SDC3	0.00118884514173036	0	PTN_SDC3	PTN - SDC3	PTN	Secreted Signaling	PMID: 28356350; PMID: 25620911
Astrocyte_01_CAV1	GE2	PTN	SDC3	0.00612854186012946	0	PTN_SDC3	PTN - SDC3	PTN	Secreted Signaling	PMID: 28356350; PMID: 25620911
Astrocyte_02_MALAT1	GE2	PTN	SDC3	0.00230262160579814	0	PTN_SDC3	PTN - SDC3	PTN	Secreted Signaling	PMID: 28356350; PMID: 25620911
Astrocyte_03_ROM1	GE2	PTN	SDC3	0.00977022896704301	0	PTN_SDC3	PTN - SDC3	PTN	Secreted Signaling	PMID: 28356350; PMID: 25620911
Astrocyte_04_SCGB3A1	GE2	PTN	SDC3	0.0103676257676866	0	PTN_SDC3	PTN - SDC3	PTN	Secreted Signaling	PMID: 28356350; PMID: 25620911
Astrocyte_05_HLA-DRB5	GE2	PTN	SDC3	0.0104833608977473	0	PTN_SDC3	PTN - SDC3	PTN	Secreted Signaling	PMID: 28356350; PMID: 25620911
Astrocyte_06_CCL5	GE2	PTN	SDC3	0.00223485985296146	0	PTN_SDC3	PTN - SDC3	PTN	Secreted Signaling	PMID: 28356350; PMID: 25620911
Fibroblast_01_Myo_HIGD1B	GE2	PTN	SDC3	0.00192870493743643	0	PTN_SDC3	PTN - SDC3	PTN	Secreted Signaling	PMID: 28356350; PMID: 25620911
Fibroblast_03_Myo_MKI67	GE2	PTN	SDC3	0.00344844029141604	0	PTN_SDC3	PTN - SDC3	PTN	Secreted Signaling	PMID: 28356350; PMID: 25620911
GE1	GE2	PTN	SDC3	0.000847979265337483	0	PTN_SDC3	PTN - SDC3	PTN	Secreted Signaling	PMID: 28356350; PMID: 25620911
GE11	GE2	PTN	SDC3	0.00120005381809093	0	PTN_SDC3	PTN - SDC3	PTN	Secreted Signaling	PMID: 28356350; PMID: 25620911
GE2	GE2	PTN	SDC3	0.00107098864657097	0	PTN_SDC3	PTN - SDC3	PTN	Secreted Signaling	PMID: 28356350; PMID: 25620911
Astrocyte_01_CAV1	GE8	PTN	SDC3	0.00102932826855672	0	PTN_SDC3	PTN - SDC3	PTN	Secreted Signaling	PMID: 28356350; PMID: 25620911
Astrocyte_02_MALAT1	GE8	PTN	SDC3	0.00038550544181541	0	PTN_SDC3	PTN - SDC3	PTN	Secreted Signaling	PMID: 28356350; PMID: 25620911
Astrocyte_03_ROM1	GE8	PTN	SDC3	0.00164599136408703	0	PTN_SDC3	PTN - SDC3	PTN	Secreted Signaling	PMID: 28356350; PMID: 25620911
Astrocyte_04_SCGB3A1	GE8	PTN	SDC3	0.00174751150467357	0	PTN_SDC3	PTN - SDC3	PTN	Secreted Signaling	PMID: 28356350; PMID: 25620911
Astrocyte_05_HLA-DRB5	GE8	PTN	SDC3	0.00176719103247215	0	PTN_SDC3	PTN - SDC3	PTN	Secreted Signaling	PMID: 28356350; PMID: 25620911
Astrocyte_06_CCL5	GE8	PTN	SDC3	0.000374139596909541	0	PTN_SDC3	PTN - SDC3	PTN	Secreted Signaling	PMID: 28356350; PMID: 25620911
Fibroblast_01_Myo_HIGD1B	GE8	PTN	SDC3	0.000322803501063904	0	PTN_SDC3	PTN - SDC3	PTN	Secreted Signaling	PMID: 28356350; PMID: 25620911
Fibroblast_03_Myo_MKI67	GE8	PTN	SDC3	0.000577891243383817	0	PTN_SDC3	PTN - SDC3	PTN	Secreted Signaling	PMID: 28356350; PMID: 25620911
GE1	GE8	PTN	SDC3	0.000141796757514742	0	PTN_SDC3	PTN - SDC3	PTN	Secreted Signaling	PMID: 28356350; PMID: 25620911
GE11	GE8	PTN	SDC3	0.000200728598553015	0	PTN_SDC3	PTN - SDC3	PTN	Secreted Signaling	PMID: 28356350; PMID: 25620911
GE2	GE8	PTN	SDC3	0.000179121066407808	0	PTN_SDC3	PTN - SDC3	PTN	Secreted Signaling	PMID: 28356350; PMID: 25620911
Astrocyte_01_CAV1	Astrocyte_05_HLA-DRB5	PTN	SDC4	0.00356176513408394	0	PTN_SDC4	PTN - SDC4	PTN	Secreted Signaling	PMID: 28356350; PMID: 25620911
Astrocyte_02_MALAT1	Astrocyte_05_HLA-DRB5	PTN	SDC4	0.00133607569168523	0	PTN_SDC4	PTN - SDC4	PTN	Secreted Signaling	PMID: 28356350; PMID: 25620911
Astrocyte_03_ROM1	Astrocyte_05_HLA-DRB5	PTN	SDC4	0.00568695583902701	0	PTN_SDC4	PTN - SDC4	PTN	Secreted Signaling	PMID: 28356350; PMID: 25620911
Astrocyte_04_SCGB3A1	Astrocyte_05_HLA-DRB5	PTN	SDC4	0.00603620444262658	0	PTN_SDC4	PTN - SDC4	PTN	Secreted Signaling	PMID: 28356350; PMID: 25620911
Astrocyte_05_HLA-DRB5	Astrocyte_05_HLA-DRB5	PTN	SDC4	0.00610388559172337	0	PTN_SDC4	PTN - SDC4	PTN	Secreted Signaling	PMID: 28356350; PMID: 25620911
Astrocyte_06_CCL5	Astrocyte_05_HLA-DRB5	PTN	SDC4	0.0012967205692085	0	PTN_SDC4	PTN - SDC4	PTN	Secreted Signaling	PMID: 28356350; PMID: 25620911
Fibroblast_01_Myo_HIGD1B	Astrocyte_05_HLA-DRB5	PTN	SDC4	0.00111893784496311	0	PTN_SDC4	PTN - SDC4	PTN	Secreted Signaling	PMID: 28356350; PMID: 25620911
Fibroblast_03_Myo_MKI67	Astrocyte_05_HLA-DRB5	PTN	SDC4	0.00200189185264794	0	PTN_SDC4	PTN - SDC4	PTN	Secreted Signaling	PMID: 28356350; PMID: 25620911
GE1	Astrocyte_05_HLA-DRB5	PTN	SDC4	0.000491731477311092	0	PTN_SDC4	PTN - SDC4	PTN	Secreted Signaling	PMID: 28356350; PMID: 25620911
GE11	Astrocyte_05_HLA-DRB5	PTN	SDC4	0.000695997686605009	0	PTN_SDC4	PTN - SDC4	PTN	Secreted Signaling	PMID: 28356350; PMID: 25620911
GE2	Astrocyte_05_HLA-DRB5	PTN	SDC4	0.000621109781606333	0	PTN_SDC4	PTN - SDC4	PTN	Secreted Signaling	PMID: 28356350; PMID: 25620911
Astrocyte_01_CAV1	GE1	PTN	SDC4	0.0475283709510852	0	PTN_SDC4	PTN - SDC4	PTN	Secreted Signaling	PMID: 28356350; PMID: 25620911
Astrocyte_02_MALAT1	GE1	PTN	SDC4	0.0183341744435052	0	PTN_SDC4	PTN - SDC4	PTN	Secreted Signaling	PMID: 28356350; PMID: 25620911
Astrocyte_03_ROM1	GE1	PTN	SDC4	0.0739403759644984	0	PTN_SDC4	PTN - SDC4	PTN	Secreted Signaling	PMID: 28356350; PMID: 25620911
Astrocyte_04_SCGB3A1	GE1	PTN	SDC4	0.0781517647839364	0	PTN_SDC4	PTN - SDC4	PTN	Secreted Signaling	PMID: 28356350; PMID: 25620911
Astrocyte_05_HLA-DRB5	GE1	PTN	SDC4	0.0789638063807125	0	PTN_SDC4	PTN - SDC4	PTN	Secreted Signaling	PMID: 28356350; PMID: 25620911
Astrocyte_06_CCL5	GE1	PTN	SDC4	0.0178030532045674	0	PTN_SDC4	PTN - SDC4	PTN	Secreted Signaling	PMID: 28356350; PMID: 25620911
Fibroblast_01_Myo_HIGD1B	GE1	PTN	SDC4	0.0153971122080489	0	PTN_SDC4	PTN - SDC4	PTN	Secreted Signaling	PMID: 28356350; PMID: 25620911
Fibroblast_03_Myo_MKI67	GE1	PTN	SDC4	0.0272397242741834	0	PTN_SDC4	PTN - SDC4	PTN	Secreted Signaling	PMID: 28356350; PMID: 25620911
GE1	GE1	PTN	SDC4	0.00682111049068945	0	PTN_SDC4	PTN - SDC4	PTN	Secreted Signaling	PMID: 28356350; PMID: 25620911
GE11	GE1	PTN	SDC4	0.00962928290083472	0	PTN_SDC4	PTN - SDC4	PTN	Secreted Signaling	PMID: 28356350; PMID: 25620911
GE2	GE1	PTN	SDC4	0.00860146557979216	0	PTN_SDC4	PTN - SDC4	PTN	Secreted Signaling	PMID: 28356350; PMID: 25620911
Astrocyte_01_CAV1	GE11	PTN	SDC4	0.0495305995145876	0	PTN_SDC4	PTN - SDC4	PTN	Secreted Signaling	PMID: 28356350; PMID: 25620911
Astrocyte_02_MALAT1	GE11	PTN	SDC4	0.0191312414735467	0	PTN_SDC4	PTN - SDC4	PTN	Secreted Signaling	PMID: 28356350; PMID: 25620911
Astrocyte_03_ROM1	GE11	PTN	SDC4	0.0769653541071871	0	PTN_SDC4	PTN - SDC4	PTN	Secreted Signaling	PMID: 28356350; PMID: 25620911
Astrocyte_04_SCGB3A1	GE11	PTN	SDC4	0.0813339031708065	0	PTN_SDC4	PTN - SDC4	PTN	Secreted Signaling	PMID: 28356350; PMID: 25620911
Astrocyte_05_HLA-DRB5	GE11	PTN	SDC4	0.0821760615715511	0	PTN_SDC4	PTN - SDC4	PTN	Secreted Signaling	PMID: 28356350; PMID: 25620911
Astrocyte_06_CCL5	GE11	PTN	SDC4	0.0185774670316607	0	PTN_SDC4	PTN - SDC4	PTN	Secreted Signaling	PMID: 28356350; PMID: 25620911
Fibroblast_01_Myo_HIGD1B	GE11	PTN	SDC4	0.0160685823207474	0	PTN_SDC4	PTN - SDC4	PTN	Secreted Signaling	PMID: 28356350; PMID: 25620911
Fibroblast_03_Myo_MKI67	GE11	PTN	SDC4	0.0284127488168186	0	PTN_SDC4	PTN - SDC4	PTN	Secreted Signaling	PMID: 28356350; PMID: 25620911
GE1	GE11	PTN	SDC4	0.00712128504117149	0	PTN_SDC4	PTN - SDC4	PTN	Secreted Signaling	PMID: 28356350; PMID: 25620911
GE11	GE11	PTN	SDC4	0.0100517851322088	0	PTN_SDC4	PTN - SDC4	PTN	Secreted Signaling	PMID: 28356350; PMID: 25620911
GE2	GE11	PTN	SDC4	0.00897927934313075	0	PTN_SDC4	PTN - SDC4	PTN	Secreted Signaling	PMID: 28356350; PMID: 25620911
Astrocyte_01_CAV1	GE2	PTN	SDC4	0.0438669242912128	0	PTN_SDC4	PTN - SDC4	PTN	Secreted Signaling	PMID: 28356350; PMID: 25620911
Astrocyte_02_MALAT1	GE2	PTN	SDC4	0.0168819006804622	0	PTN_SDC4	PTN - SDC4	PTN	Secreted Signaling	PMID: 28356350; PMID: 25620911
Astrocyte_03_ROM1	GE2	PTN	SDC4	0.0683903235327674	0	PTN_SDC4	PTN - SDC4	PTN	Secreted Signaling	PMID: 28356350; PMID: 25620911
Astrocyte_04_SCGB3A1	GE2	PTN	SDC4	0.0723102837301265	0	PTN_SDC4	PTN - SDC4	PTN	Secreted Signaling	PMID: 28356350; PMID: 25620911
Astrocyte_05_HLA-DRB5	GE2	PTN	SDC4	0.0730664398338152	0	PTN_SDC4	PTN - SDC4	PTN	Secreted Signaling	PMID: 28356350; PMID: 25620911
Astrocyte_06_CCL5	GE2	PTN	SDC4	0.0163921477337044	0	PTN_SDC4	PTN - SDC4	PTN	Secreted Signaling	PMID: 28356350; PMID: 25620911
Fibroblast_01_Myo_HIGD1B	GE2	PTN	SDC4	0.0141741277807028	0	PTN_SDC4	PTN - SDC4	PTN	Secreted Signaling	PMID: 28356350; PMID: 25620911
Fibroblast_03_Myo_MKI67	GE2	PTN	SDC4	0.025100067128977	0	PTN_SDC4	PTN - SDC4	PTN	Secreted Signaling	PMID: 28356350; PMID: 25620911
GE1	GE2	PTN	SDC4	0.00627497204100754	0	PTN_SDC4	PTN - SDC4	PTN	Secreted Signaling	PMID: 28356350; PMID: 25620911
GE11	GE2	PTN	SDC4	0.00886031138346831	0	PTN_SDC4	PTN - SDC4	PTN	Secreted Signaling	PMID: 28356350; PMID: 25620911
GE2	GE2	PTN	SDC4	0.00791391721472038	0	PTN_SDC4	PTN - SDC4	PTN	Secreted Signaling	PMID: 28356350; PMID: 25620911
Astrocyte_01_CAV1	GE8	PTN	SDC4	0.0582730433880913	0	PTN_SDC4	PTN - SDC4	PTN	Secreted Signaling	PMID: 28356350; PMID: 25620911
Astrocyte_02_MALAT1	GE8	PTN	SDC4	0.0226358042568336	0	PTN_SDC4	PTN - SDC4	PTN	Secreted Signaling	PMID: 28356350; PMID: 25620911
Astrocyte_03_ROM1	GE8	PTN	SDC4	0.0900912030415305	0	PTN_SDC4	PTN - SDC4	PTN	Secreted Signaling	PMID: 28356350; PMID: 25620911
Astrocyte_04_SCGB3A1	GE8	PTN	SDC4	0.0951279924888761	0	PTN_SDC4	PTN - SDC4	PTN	Secreted Signaling	PMID: 28356350; PMID: 25620911
Astrocyte_05_HLA-DRB5	GE8	PTN	SDC4	0.096098038760301	0	PTN_SDC4	PTN - SDC4	PTN	Secreted Signaling	PMID: 28356350; PMID: 25620911
Astrocyte_06_CCL5	GE8	PTN	SDC4	0.0219828599711613	0	PTN_SDC4	PTN - SDC4	PTN	Secreted Signaling	PMID: 28356350; PMID: 25620911
Fibroblast_01_Myo_HIGD1B	GE8	PTN	SDC4	0.019022991587249	0	PTN_SDC4	PTN - SDC4	PTN	Secreted Signaling	PMID: 28356350; PMID: 25620911
Fibroblast_03_Myo_MKI67	GE8	PTN	SDC4	0.033559375829626	0	PTN_SDC4	PTN - SDC4	PTN	Secreted Signaling	PMID: 28356350; PMID: 25620911
GE1	GE8	PTN	SDC4	0.00844474119500121	0	PTN_SDC4	PTN - SDC4	PTN	Secreted Signaling	PMID: 28356350; PMID: 25620911
GE11	GE8	PTN	SDC4	0.0119133256988622	0	PTN_SDC4	PTN - SDC4	PTN	Secreted Signaling	PMID: 28356350; PMID: 25620911
GE2	GE8	PTN	SDC4	0.0106443328506149	0	PTN_SDC4	PTN - SDC4	PTN	Secreted Signaling	PMID: 28356350; PMID: 25620911
Astrocyte_01_CAV1	GE9	PTN	SDC4	0.0551791902023368	0	PTN_SDC4	PTN - SDC4	PTN	Secreted Signaling	PMID: 28356350; PMID: 25620911
Astrocyte_02_MALAT1	GE9	PTN	SDC4	0.0213910383957566	0	PTN_SDC4	PTN - SDC4	PTN	Secreted Signaling	PMID: 28356350; PMID: 25620911
Astrocyte_03_ROM1	GE9	PTN	SDC4	0.0854613521947913	0	PTN_SDC4	PTN - SDC4	PTN	Secreted Signaling	PMID: 28356350; PMID: 25620911
Astrocyte_04_SCGB3A1	GE9	PTN	SDC4	0.0902649753770901	0	PTN_SDC4	PTN - SDC4	PTN	Secreted Signaling	PMID: 28356350; PMID: 25620911
Astrocyte_05_HLA-DRB5	GE9	PTN	SDC4	0.0911904296181872	0	PTN_SDC4	PTN - SDC4	PTN	Secreted Signaling	PMID: 28356350; PMID: 25620911
Astrocyte_06_CCL5	GE9	PTN	SDC4	0.0207732370193415	0	PTN_SDC4	PTN - SDC4	PTN	Secreted Signaling	PMID: 28356350; PMID: 25620911
Fibroblast_01_Myo_HIGD1B	GE9	PTN	SDC4	0.0179732444791724	0	PTN_SDC4	PTN - SDC4	PTN	Secreted Signaling	PMID: 28356350; PMID: 25620911
Fibroblast_03_Myo_MKI67	GE9	PTN	SDC4	0.0317334153658276	0	PTN_SDC4	PTN - SDC4	PTN	Secreted Signaling	PMID: 28356350; PMID: 25620911
GE1	GE9	PTN	SDC4	0.00797398943288872	0	PTN_SDC4	PTN - SDC4	PTN	Secreted Signaling	PMID: 28356350; PMID: 25620911
GE11	GE9	PTN	SDC4	0.0112514118889378	0	PTN_SDC4	PTN - SDC4	PTN	Secreted Signaling	PMID: 28356350; PMID: 25620911
GE2	GE9	PTN	SDC4	0.010052207999487	0	PTN_SDC4	PTN - SDC4	PTN	Secreted Signaling	PMID: 28356350; PMID: 25620911
Astrocyte_01_CAV1	Astrocyte_01_CAV1	PTN	NCL	0.0455129170560091	0	PTN_NCL	PTN - NCL	PTN	Secreted Signaling	PMID: 28356350; PMID: 25620911
Astrocyte_02_MALAT1	Astrocyte_01_CAV1	PTN	NCL	0.0175339186843782	0	PTN_NCL	PTN - NCL	PTN	Secreted Signaling	PMID: 28356350; PMID: 25620911
Astrocyte_03_ROM1	Astrocyte_01_CAV1	PTN	NCL	0.0708882708931207	0	PTN_NCL	PTN - NCL	PTN	Secreted Signaling	PMID: 28356350; PMID: 25620911
Astrocyte_04_SCGB3A1	Astrocyte_01_CAV1	PTN	NCL	0.0749398898444841	0	PTN_NCL	PTN - NCL	PTN	Secreted Signaling	PMID: 28356350; PMID: 25620911
Astrocyte_05_HLA-DRB5	Astrocyte_01_CAV1	PTN	NCL	0.0757212995221916	0	PTN_NCL	PTN - NCL	PTN	Secreted Signaling	PMID: 28356350; PMID: 25620911
Astrocyte_06_CCL5	Astrocyte_01_CAV1	PTN	NCL	0.0170255779229641	0	PTN_NCL	PTN - NCL	PTN	Secreted Signaling	PMID: 28356350; PMID: 25620911
Fibroblast_01_Myo_HIGD1B	Astrocyte_01_CAV1	PTN	NCL	0.0147231315318226	0	PTN_NCL	PTN - NCL	PTN	Secreted Signaling	PMID: 28356350; PMID: 25620911
Fibroblast_03_Myo_MKI67	Astrocyte_01_CAV1	PTN	NCL	0.0260610757582209	0	PTN_NCL	PTN - NCL	PTN	Secreted Signaling	PMID: 28356350; PMID: 25620911
GE1	Astrocyte_01_CAV1	PTN	NCL	0.00652004285106171	0	PTN_NCL	PTN - NCL	PTN	Secreted Signaling	PMID: 28356350; PMID: 25620911
GE11	Astrocyte_01_CAV1	PTN	NCL	0.00920541800264061	0	PTN_NCL	PTN - NCL	PTN	Secreted Signaling	PMID: 28356350; PMID: 25620911
GE2	Astrocyte_01_CAV1	PTN	NCL	0.00822246785339884	0	PTN_NCL	PTN - NCL	PTN	Secreted Signaling	PMID: 28356350; PMID: 25620911
Astrocyte_01_CAV1	Astrocyte_02_MALAT1	PTN	NCL	0.0151226552125284	0	PTN_NCL	PTN - NCL	PTN	Secreted Signaling	PMID: 28356350; PMID: 25620911
Astrocyte_02_MALAT1	Astrocyte_02_MALAT1	PTN	NCL	0.00571418050275016	0	PTN_NCL	PTN - NCL	PTN	Secreted Signaling	PMID: 28356350; PMID: 25620911
Astrocyte_03_ROM1	Astrocyte_02_MALAT1	PTN	NCL	0.0239798526516462	0	PTN_NCL	PTN - NCL	PTN	Secreted Signaling	PMID: 28356350; PMID: 25620911
Astrocyte_04_SCGB3A1	Astrocyte_02_MALAT1	PTN	NCL	0.0254237840999964	0	PTN_NCL	PTN - NCL	PTN	Secreted Signaling	PMID: 28356350; PMID: 25620911
Astrocyte_05_HLA-DRB5	Astrocyte_02_MALAT1	PTN	NCL	0.0257032277503296	0	PTN_NCL	PTN - NCL	PTN	Secreted Signaling	PMID: 28356350; PMID: 25620911
Astrocyte_06_CCL5	Astrocyte_02_MALAT1	PTN	NCL	0.0055465812299716	0	PTN_NCL	PTN - NCL	PTN	Secreted Signaling	PMID: 28356350; PMID: 25620911
Fibroblast_01_Myo_HIGD1B	Astrocyte_02_MALAT1	PTN	NCL	0.00478892891631546	0	PTN_NCL	PTN - NCL	PTN	Secreted Signaling	PMID: 28356350; PMID: 25620911
Fibroblast_03_Myo_MKI67	Astrocyte_02_MALAT1	PTN	NCL	0.00854310491952304	0	PTN_NCL	PTN - NCL	PTN	Secreted Signaling	PMID: 28356350; PMID: 25620911
GE1	Astrocyte_02_MALAT1	PTN	NCL	0.00210889898035204	0	PTN_NCL	PTN - NCL	PTN	Secreted Signaling	PMID: 28356350; PMID: 25620911
GE11	Astrocyte_02_MALAT1	PTN	NCL	0.00298293486112434	0.01	PTN_NCL	PTN - NCL	PTN	Secreted Signaling	PMID: 28356350; PMID: 25620911
GE2	Astrocyte_02_MALAT1	PTN	NCL	0.0026626329173181	0	PTN_NCL	PTN - NCL	PTN	Secreted Signaling	PMID: 28356350; PMID: 25620911
Astrocyte_01_CAV1	Astrocyte_03_ROM1	PTN	NCL	0.0483406535165136	0	PTN_NCL	PTN - NCL	PTN	Secreted Signaling	PMID: 28356350; PMID: 25620911
Astrocyte_02_MALAT1	Astrocyte_03_ROM1	PTN	NCL	0.0186572876776956	0	PTN_NCL	PTN - NCL	PTN	Secreted Signaling	PMID: 28356350; PMID: 25620911
Astrocyte_03_ROM1	Astrocyte_03_ROM1	PTN	NCL	0.0751684286157767	0	PTN_NCL	PTN - NCL	PTN	Secreted Signaling	PMID: 28356350; PMID: 25620911
Astrocyte_04_SCGB3A1	Astrocyte_03_ROM1	PTN	NCL	0.0794437626607731	0	PTN_NCL	PTN - NCL	PTN	Secreted Signaling	PMID: 28356350; PMID: 25620911
Astrocyte_05_HLA-DRB5	Astrocyte_03_ROM1	PTN	NCL	0.0802680599359123	0	PTN_NCL	PTN - NCL	PTN	Secreted Signaling	PMID: 28356350; PMID: 25620911
Astrocyte_06_CCL5	Astrocyte_03_ROM1	PTN	NCL	0.0181169789436788	0	PTN_NCL	PTN - NCL	PTN	Secreted Signaling	PMID: 28356350; PMID: 25620911
Fibroblast_01_Myo_HIGD1B	Astrocyte_03_ROM1	PTN	NCL	0.015669290193324	0	PTN_NCL	PTN - NCL	PTN	Secreted Signaling	PMID: 28356350; PMID: 25620911
Fibroblast_03_Myo_MKI67	Astrocyte_03_ROM1	PTN	NCL	0.0277153538151106	0	PTN_NCL	PTN - NCL	PTN	Secreted Signaling	PMID: 28356350; PMID: 25620911
GE1	Astrocyte_03_ROM1	PTN	NCL	0.00694275767274955	0	PTN_NCL	PTN - NCL	PTN	Secreted Signaling	PMID: 28356350; PMID: 25620911
GE11	Astrocyte_03_ROM1	PTN	NCL	0.00980051663477653	0	PTN_NCL	PTN - NCL	PTN	Secreted Signaling	PMID: 28356350; PMID: 25620911
GE2	Astrocyte_03_ROM1	PTN	NCL	0.00875458360997995	0	PTN_NCL	PTN - NCL	PTN	Secreted Signaling	PMID: 28356350; PMID: 25620911
Astrocyte_01_CAV1	Astrocyte_04_SCGB3A1	PTN	NCL	0.0521422926123906	0	PTN_NCL	PTN - NCL	PTN	Secreted Signaling	PMID: 28356350; PMID: 25620911
Astrocyte_02_MALAT1	Astrocyte_04_SCGB3A1	PTN	NCL	0.0201740330370365	0	PTN_NCL	PTN - NCL	PTN	Secreted Signaling	PMID: 28356350; PMID: 25620911
Astrocyte_03_ROM1	Astrocyte_04_SCGB3A1	PTN	NCL	0.0809005214219014	0	PTN_NCL	PTN - NCL	PTN	Secreted Signaling	PMID: 28356350; PMID: 25620911
Astrocyte_04_SCGB3A1	Astrocyte_04_SCGB3A1	PTN	NCL	0.0854717475366218	0	PTN_NCL	PTN - NCL	PTN	Secreted Signaling	PMID: 28356350; PMID: 25620911
Astrocyte_05_HLA-DRB5	Astrocyte_04_SCGB3A1	PTN	NCL	0.0863527232536663	0	PTN_NCL	PTN - NCL	PTN	Secreted Signaling	PMID: 28356350; PMID: 25620911
Astrocyte_06_CCL5	Astrocyte_04_SCGB3A1	PTN	NCL	0.0195906767403178	0	PTN_NCL	PTN - NCL	PTN	Secreted Signaling	PMID: 28356350; PMID: 25620911
Fibroblast_01_Myo_HIGD1B	Astrocyte_04_SCGB3A1	PTN	NCL	0.0169473210420842	0	PTN_NCL	PTN - NCL	PTN	Secreted Signaling	PMID: 28356350; PMID: 25620911
Fibroblast_03_Myo_MKI67	Astrocyte_04_SCGB3A1	PTN	NCL	0.0299460044591525	0	PTN_NCL	PTN - NCL	PTN	Secreted Signaling	PMID: 28356350; PMID: 25620911
GE1	Astrocyte_04_SCGB3A1	PTN	NCL	0.00751446191697984	0	PTN_NCL	PTN - NCL	PTN	Secreted Signaling	PMID: 28356350; PMID: 25620911
GE11	Astrocyte_04_SCGB3A1	PTN	NCL	0.0106050311605525	0	PTN_NCL	PTN - NCL	PTN	Secreted Signaling	PMID: 28356350; PMID: 25620911
GE2	Astrocyte_04_SCGB3A1	PTN	NCL	0.00947406003858383	0	PTN_NCL	PTN - NCL	PTN	Secreted Signaling	PMID: 28356350; PMID: 25620911
Astrocyte_01_CAV1	Astrocyte_05_HLA-DRB5	PTN	NCL	0.0485705658094797	0	PTN_NCL	PTN - NCL	PTN	Secreted Signaling	PMID: 28356350; PMID: 25620911
Astrocyte_02_MALAT1	Astrocyte_05_HLA-DRB5	PTN	NCL	0.0187488046827722	0	PTN_NCL	PTN - NCL	PTN	Secreted Signaling	PMID: 28356350; PMID: 25620911
Astrocyte_03_ROM1	Astrocyte_05_HLA-DRB5	PTN	NCL	0.0755158112082165	0	PTN_NCL	PTN - NCL	PTN	Secreted Signaling	PMID: 28356350; PMID: 25620911
Astrocyte_04_SCGB3A1	Astrocyte_05_HLA-DRB5	PTN	NCL	0.0798091982038314	0	PTN_NCL	PTN - NCL	PTN	Secreted Signaling	PMID: 28356350; PMID: 25620911
Astrocyte_05_HLA-DRB5	Astrocyte_05_HLA-DRB5	PTN	NCL	0.0806369550485615	0	PTN_NCL	PTN - NCL	PTN	Secreted Signaling	PMID: 28356350; PMID: 25620911
Astrocyte_06_CCL5	Astrocyte_05_HLA-DRB5	PTN	NCL	0.018205894815735	0	PTN_NCL	PTN - NCL	PTN	Secreted Signaling	PMID: 28356350; PMID: 25620911
Fibroblast_01_Myo_HIGD1B	Astrocyte_05_HLA-DRB5	PTN	NCL	0.0157463857652219	0	PTN_NCL	PTN - NCL	PTN	Secreted Signaling	PMID: 28356350; PMID: 25620911
Fibroblast_03_Myo_MKI67	Astrocyte_05_HLA-DRB5	PTN	NCL	0.0278500411569235	0	PTN_NCL	PTN - NCL	PTN	Secreted Signaling	PMID: 28356350; PMID: 25620911
GE1	Astrocyte_05_HLA-DRB5	PTN	NCL	0.0069772215639202	0	PTN_NCL	PTN - NCL	PTN	Secreted Signaling	PMID: 28356350; PMID: 25620911
GE11	Astrocyte_05_HLA-DRB5	PTN	NCL	0.00984902576433179	0	PTN_NCL	PTN - NCL	PTN	Secreted Signaling	PMID: 28356350; PMID: 25620911
GE2	Astrocyte_05_HLA-DRB5	PTN	NCL	0.0087979617347577	0	PTN_NCL	PTN - NCL	PTN	Secreted Signaling	PMID: 28356350; PMID: 25620911
Astrocyte_01_CAV1	Astrocyte_06_CCL5	PTN	NCL	0.0339319344580246	0	PTN_NCL	PTN - NCL	PTN	Secreted Signaling	PMID: 28356350; PMID: 25620911
Astrocyte_02_MALAT1	Astrocyte_06_CCL5	PTN	NCL	0.0129755451298649	0	PTN_NCL	PTN - NCL	PTN	Secreted Signaling	PMID: 28356350; PMID: 25620911
Astrocyte_03_ROM1	Astrocyte_06_CCL5	PTN	NCL	0.0532103620328886	0	PTN_NCL	PTN - NCL	PTN	Secreted Signaling	PMID: 28356350; PMID: 25620911
Astrocyte_04_SCGB3A1	Astrocyte_06_CCL5	PTN	NCL	0.0563128386509552	0	PTN_NCL	PTN - NCL	PTN	Secreted Signaling	PMID: 28356350; PMID: 25620911
Astrocyte_05_HLA-DRB5	Astrocyte_06_CCL5	PTN	NCL	0.056911970549607	0	PTN_NCL	PTN - NCL	PTN	Secreted Signaling	PMID: 28356350; PMID: 25620911
Astrocyte_06_CCL5	Astrocyte_06_CCL5	PTN	NCL	0.0125976654907261	0	PTN_NCL	PTN - NCL	PTN	Secreted Signaling	PMID: 28356350; PMID: 25620911
Fibroblast_01_Myo_HIGD1B	Astrocyte_06_CCL5	PTN	NCL	0.0108873934860218	0	PTN_NCL	PTN - NCL	PTN	Secreted Signaling	PMID: 28356350; PMID: 25620911
Fibroblast_03_Myo_MKI67	Astrocyte_06_CCL5	PTN	NCL	0.0193294731028399	0	PTN_NCL	PTN - NCL	PTN	Secreted Signaling	PMID: 28356350; PMID: 25620911
GE1	Astrocyte_06_CCL5	PTN	NCL	0.00481097604738329	0	PTN_NCL	PTN - NCL	PTN	Secreted Signaling	PMID: 28356350; PMID: 25620911
GE11	Astrocyte_06_CCL5	PTN	NCL	0.00679726302468291	0	PTN_NCL	PTN - NCL	PTN	Secreted Signaling	PMID: 28356350; PMID: 25620911
GE2	Astrocyte_06_CCL5	PTN	NCL	0.0060698791966616	0	PTN_NCL	PTN - NCL	PTN	Secreted Signaling	PMID: 28356350; PMID: 25620911
Astrocyte_01_CAV1	B_04_PTMAP2	PTN	NCL	0.040368093127681	0	PTN_NCL	PTN - NCL	PTN	Secreted Signaling	PMID: 28356350; PMID: 25620911
Astrocyte_02_MALAT1	B_04_PTMAP2	PTN	NCL	0.0155005054253536	0	PTN_NCL	PTN - NCL	PTN	Secreted Signaling	PMID: 28356350; PMID: 25620911
Astrocyte_03_ROM1	B_04_PTMAP2	PTN	NCL	0.0630645160097337	0	PTN_NCL	PTN - NCL	PTN	Secreted Signaling	PMID: 28356350; PMID: 25620911
Astrocyte_04_SCGB3A1	B_04_PTMAP2	PTN	NCL	0.066701070433538	0	PTN_NCL	PTN - NCL	PTN	Secreted Signaling	PMID: 28356350; PMID: 25620911
Astrocyte_05_HLA-DRB5	B_04_PTMAP2	PTN	NCL	0.0674028321722788	0	PTN_NCL	PTN - NCL	PTN	Secreted Signaling	PMID: 28356350; PMID: 25620911
Astrocyte_06_CCL5	B_04_PTMAP2	PTN	NCL	0.0150502139975642	0	PTN_NCL	PTN - NCL	PTN	Secreted Signaling	PMID: 28356350; PMID: 25620911
Fibroblast_01_Myo_HIGD1B	B_04_PTMAP2	PTN	NCL	0.013011369033641	0	PTN_NCL	PTN - NCL	PTN	Secreted Signaling	PMID: 28356350; PMID: 25620911
Fibroblast_03_Myo_MKI67	B_04_PTMAP2	PTN	NCL	0.0230619787313159	0	PTN_NCL	PTN - NCL	PTN	Secreted Signaling	PMID: 28356350; PMID: 25620911
GE1	B_04_PTMAP2	PTN	NCL	0.00575642792752843	0	PTN_NCL	PTN - NCL	PTN	Secreted Signaling	PMID: 28356350; PMID: 25620911
GE11	B_04_PTMAP2	PTN	NCL	0.00812987076120419	0	PTN_NCL	PTN - NCL	PTN	Secreted Signaling	PMID: 28356350; PMID: 25620911
GE2	B_04_PTMAP2	PTN	NCL	0.00726092539511582	0	PTN_NCL	PTN - NCL	PTN	Secreted Signaling	PMID: 28356350; PMID: 25620911
Astrocyte_01_CAV1	CD4T_04_SNORD3A	PTN	NCL	0.0406863641797413	0	PTN_NCL	PTN - NCL	PTN	Secreted Signaling	PMID: 28356350; PMID: 25620911
Astrocyte_02_MALAT1	CD4T_04_SNORD3A	PTN	NCL	0.015625907384527	0	PTN_NCL	PTN - NCL	PTN	Secreted Signaling	PMID: 28356350; PMID: 25620911
Astrocyte_03_ROM1	CD4T_04_SNORD3A	PTN	NCL	0.0635498805041648	0	PTN_NCL	PTN - NCL	PTN	Secreted Signaling	PMID: 28356350; PMID: 25620911
Astrocyte_04_SCGB3A1	CD4T_04_SNORD3A	PTN	NCL	0.067212415238066	0	PTN_NCL	PTN - NCL	PTN	Secreted Signaling	PMID: 28356350; PMID: 25620911
Astrocyte_05_HLA-DRB5	CD4T_04_SNORD3A	PTN	NCL	0.0679191653242854	0	PTN_NCL	PTN - NCL	PTN	Secreted Signaling	PMID: 28356350; PMID: 25620911
Astrocyte_06_CCL5	CD4T_04_SNORD3A	PTN	NCL	0.0151720291567266	0	PTN_NCL	PTN - NCL	PTN	Secreted Signaling	PMID: 28356350; PMID: 25620911
Fibroblast_01_Myo_HIGD1B	CD4T_04_SNORD3A	PTN	NCL	0.0131169017198739	0	PTN_NCL	PTN - NCL	PTN	Secreted Signaling	PMID: 28356350; PMID: 25620911
Fibroblast_03_Myo_MKI67	CD4T_04_SNORD3A	PTN	NCL	0.0232471099070225	0	PTN_NCL	PTN - NCL	PTN	Secreted Signaling	PMID: 28356350; PMID: 25620911
GE1	CD4T_04_SNORD3A	PTN	NCL	0.00580346319353371	0	PTN_NCL	PTN - NCL	PTN	Secreted Signaling	PMID: 28356350; PMID: 25620911
GE11	CD4T_04_SNORD3A	PTN	NCL	0.0081961393501441	0	PTN_NCL	PTN - NCL	PTN	Secreted Signaling	PMID: 28356350; PMID: 25620911
GE2	CD4T_04_SNORD3A	PTN	NCL	0.00732016326890092	0	PTN_NCL	PTN - NCL	PTN	Secreted Signaling	PMID: 28356350; PMID: 25620911
Astrocyte_01_CAV1	Endothelial_02_PTMAP2	PTN	NCL	0.0445777731196295	0	PTN_NCL	PTN - NCL	PTN	Secreted Signaling	PMID: 28356350; PMID: 25620911
Astrocyte_02_MALAT1	Endothelial_02_PTMAP2	PTN	NCL	0.0171633157989521	0	PTN_NCL	PTN - NCL	PTN	Secreted Signaling	PMID: 28356350; PMID: 25620911
Astrocyte_03_ROM1	Endothelial_02_PTMAP2	PTN	NCL	0.0694696924498305	0	PTN_NCL	PTN - NCL	PTN	Secreted Signaling	PMID: 28356350; PMID: 25620911
Astrocyte_04_SCGB3A1	Endothelial_02_PTMAP2	PTN	NCL	0.0734466418679824	0	PTN_NCL	PTN - NCL	PTN	Secreted Signaling	PMID: 28356350; PMID: 25620911
Astrocyte_05_HLA-DRB5	Endothelial_02_PTMAP2	PTN	NCL	0.0742137303634416	0	PTN_NCL	PTN - NCL	PTN	Secreted Signaling	PMID: 28356350; PMID: 25620911
Astrocyte_06_CCL5	Endothelial_02_PTMAP2	PTN	NCL	0.0166655372432894	0	PTN_NCL	PTN - NCL	PTN	Secreted Signaling	PMID: 28356350; PMID: 25620911
Fibroblast_01_Myo_HIGD1B	Endothelial_02_PTMAP2	PTN	NCL	0.0144110669646109	0	PTN_NCL	PTN - NCL	PTN	Secreted Signaling	PMID: 28356350; PMID: 25620911
Fibroblast_03_Myo_MKI67	Endothelial_02_PTMAP2	PTN	NCL	0.0255149206717612	0	PTN_NCL	PTN - NCL	PTN	Secreted Signaling	PMID: 28356350; PMID: 25620911
GE1	Endothelial_02_PTMAP2	PTN	NCL	0.00638072110472235	0	PTN_NCL	PTN - NCL	PTN	Secreted Signaling	PMID: 28356350; PMID: 25620911
GE11	Endothelial_02_PTMAP2	PTN	NCL	0.00900923491232292	0	PTN_NCL	PTN - NCL	PTN	Secreted Signaling	PMID: 28356350; PMID: 25620911
GE2	Endothelial_02_PTMAP2	PTN	NCL	0.00804706296122692	0	PTN_NCL	PTN - NCL	PTN	Secreted Signaling	PMID: 28356350; PMID: 25620911
Astrocyte_01_CAV1	Fibroblast_01_Myo_HIGD1B	PTN	NCL	0.037327272608284	0	PTN_NCL	PTN - NCL	PTN	Secreted Signaling	PMID: 28356350; PMID: 25620911
Astrocyte_02_MALAT1	Fibroblast_01_Myo_HIGD1B	PTN	NCL	0.0143049703841711	0	PTN_NCL	PTN - NCL	PTN	Secreted Signaling	PMID: 28356350; PMID: 25620911
Astrocyte_03_ROM1	Fibroblast_01_Myo_HIGD1B	PTN	NCL	0.0584181111687664	0	PTN_NCL	PTN - NCL	PTN	Secreted Signaling	PMID: 28356350; PMID: 25620911
Astrocyte_04_SCGB3A1	Fibroblast_01_Myo_HIGD1B	PTN	NCL	0.0618044090213331	0	PTN_NCL	PTN - NCL	PTN	Secreted Signaling	PMID: 28356350; PMID: 25620911
Astrocyte_05_HLA-DRB5	Fibroblast_01_Myo_HIGD1B	PTN	NCL	0.0624581006659786	0	PTN_NCL	PTN - NCL	PTN	Secreted Signaling	PMID: 28356350; PMID: 25620911
Astrocyte_06_CCL5	Fibroblast_01_Myo_HIGD1B	PTN	NCL	0.0138889194211514	0	PTN_NCL	PTN - NCL	PTN	Secreted Signaling	PMID: 28356350; PMID: 25620911
Fibroblast_01_Myo_HIGD1B	Fibroblast_01_Myo_HIGD1B	PTN	NCL	0.012005476891475	0	PTN_NCL	PTN - NCL	PTN	Secreted Signaling	PMID: 28356350; PMID: 25620911
Fibroblast_03_Myo_MKI67	Fibroblast_01_Myo_HIGD1B	PTN	NCL	0.0212958519342638	0	PTN_NCL	PTN - NCL	PTN	Secreted Signaling	PMID: 28356350; PMID: 25620911
GE1	Fibroblast_01_Myo_HIGD1B	PTN	NCL	0.00530838934937424	0	PTN_NCL	PTN - NCL	PTN	Secreted Signaling	PMID: 28356350; PMID: 25620911
GE11	Fibroblast_01_Myo_HIGD1B	PTN	NCL	0.00749849384438847	0	PTN_NCL	PTN - NCL	PTN	Secreted Signaling	PMID: 28356350; PMID: 25620911
GE2	Fibroblast_01_Myo_HIGD1B	PTN	NCL	0.00669657635514218	0	PTN_NCL	PTN - NCL	PTN	Secreted Signaling	PMID: 28356350; PMID: 25620911
Astrocyte_01_CAV1	Fibroblast_02_Myo_COL10A1	PTN	NCL	0.0289701114469779	0	PTN_NCL	PTN - NCL	PTN	Secreted Signaling	PMID: 28356350; PMID: 25620911
Astrocyte_02_MALAT1	Fibroblast_02_Myo_COL10A1	PTN	NCL	0.0110431184677434	0	PTN_NCL	PTN - NCL	PTN	Secreted Signaling	PMID: 28356350; PMID: 25620911
Astrocyte_03_ROM1	Fibroblast_02_Myo_COL10A1	PTN	NCL	0.0455624340471912	0	PTN_NCL	PTN - NCL	PTN	Secreted Signaling	PMID: 28356350; PMID: 25620911
Astrocyte_04_SCGB3A1	Fibroblast_02_Myo_COL10A1	PTN	NCL	0.0482417124350015	0	PTN_NCL	PTN - NCL	PTN	Secreted Signaling	PMID: 28356350; PMID: 25620911
Astrocyte_05_HLA-DRB5	Fibroblast_02_Myo_COL10A1	PTN	NCL	0.0487594097105765	0	PTN_NCL	PTN - NCL	PTN	Secreted Signaling	PMID: 28356350; PMID: 25620911
Astrocyte_06_CCL5	Fibroblast_02_Myo_COL10A1	PTN	NCL	0.0107209045518298	0	PTN_NCL	PTN - NCL	PTN	Secreted Signaling	PMID: 28356350; PMID: 25620911
Fibroblast_01_Myo_HIGD1B	Fibroblast_02_Myo_COL10A1	PTN	NCL	0.00926303329060295	0	PTN_NCL	PTN - NCL	PTN	Secreted Signaling	PMID: 28356350; PMID: 25620911
Fibroblast_03_Myo_MKI67	Fibroblast_02_Myo_COL10A1	PTN	NCL	0.0164665531789907	0	PTN_NCL	PTN - NCL	PTN	Secreted Signaling	PMID: 28356350; PMID: 25620911
GE1	Fibroblast_02_Myo_COL10A1	PTN	NCL	0.00408944739746334	0	PTN_NCL	PTN - NCL	PTN	Secreted Signaling	PMID: 28356350; PMID: 25620911
GE11	Fibroblast_02_Myo_COL10A1	PTN	NCL	0.00577956997087373	0	PTN_NCL	PTN - NCL	PTN	Secreted Signaling	PMID: 28356350; PMID: 25620911
GE2	Fibroblast_02_Myo_COL10A1	PTN	NCL	0.00516052492953268	0	PTN_NCL	PTN - NCL	PTN	Secreted Signaling	PMID: 28356350; PMID: 25620911
Astrocyte_01_CAV1	Fibroblast_03_Myo_MKI67	PTN	NCL	0.0590093612080743	0	PTN_NCL	PTN - NCL	PTN	Secreted Signaling	PMID: 28356350; PMID: 25620911
Astrocyte_02_MALAT1	Fibroblast_03_Myo_MKI67	PTN	NCL	0.0229327880003468	0	PTN_NCL	PTN - NCL	PTN	Secreted Signaling	PMID: 28356350; PMID: 25620911
Astrocyte_03_ROM1	Fibroblast_03_Myo_MKI67	PTN	NCL	0.0911906328026365	0	PTN_NCL	PTN - NCL	PTN	Secreted Signaling	PMID: 28356350; PMID: 25620911
Astrocyte_04_SCGB3A1	Fibroblast_03_Myo_MKI67	PTN	NCL	0.0962823846987294	0	PTN_NCL	PTN - NCL	PTN	Secreted Signaling	PMID: 28356350; PMID: 25620911
Astrocyte_05_HLA-DRB5	Fibroblast_03_Myo_MKI67	PTN	NCL	0.0972629373123223	0	PTN_NCL	PTN - NCL	PTN	Secreted Signaling	PMID: 28356350; PMID: 25620911
Astrocyte_06_CCL5	Fibroblast_03_Myo_MKI67	PTN	NCL	0.0222714722396848	0	PTN_NCL	PTN - NCL	PTN	Secreted Signaling	PMID: 28356350; PMID: 25620911
Fibroblast_01_Myo_HIGD1B	Fibroblast_03_Myo_MKI67	PTN	NCL	0.0192735096414938	0	PTN_NCL	PTN - NCL	PTN	Secreted Signaling	PMID: 28356350; PMID: 25620911
Fibroblast_03_Myo_MKI67	Fibroblast_03_Myo_MKI67	PTN	NCL	0.0339946928972982	0	PTN_NCL	PTN - NCL	PTN	Secreted Signaling	PMID: 28356350; PMID: 25620911
GE1	Fibroblast_03_Myo_MKI67	PTN	NCL	0.00855716708386106	0	PTN_NCL	PTN - NCL	PTN	Secreted Signaling	PMID: 28356350; PMID: 25620911
GE11	Fibroblast_03_Myo_MKI67	PTN	NCL	0.012071367108871	0	PTN_NCL	PTN - NCL	PTN	Secreted Signaling	PMID: 28356350; PMID: 25620911
GE2	Fibroblast_03_Myo_MKI67	PTN	NCL	0.010785723643516	0	PTN_NCL	PTN - NCL	PTN	Secreted Signaling	PMID: 28356350; PMID: 25620911
Astrocyte_01_CAV1	GE1	PTN	NCL	0.0547069432430856	0	PTN_NCL	PTN - NCL	PTN	Secreted Signaling	PMID: 28356350; PMID: 25620911
Astrocyte_02_MALAT1	GE1	PTN	NCL	0.0212014758411473	0	PTN_NCL	PTN - NCL	PTN	Secreted Signaling	PMID: 28356350; PMID: 25620911
Astrocyte_03_ROM1	GE1	PTN	NCL	0.0847531857157605	0	PTN_NCL	PTN - NCL	PTN	Secreted Signaling	PMID: 28356350; PMID: 25620911
Astrocyte_04_SCGB3A1	GE1	PTN	NCL	0.0895209005219531	0	PTN_NCL	PTN - NCL	PTN	Secreted Signaling	PMID: 28356350; PMID: 25620911
Astrocyte_05_HLA-DRB5	GE1	PTN	NCL	0.0904394844269104	0	PTN_NCL	PTN - NCL	PTN	Secreted Signaling	PMID: 28356350; PMID: 25620911
Astrocyte_06_CCL5	GE1	PTN	NCL	0.0205890340959911	0	PTN_NCL	PTN - NCL	PTN	Secreted Signaling	PMID: 28356350; PMID: 25620911
Fibroblast_01_Myo_HIGD1B	GE1	PTN	NCL	0.0178134183217761	0	PTN_NCL	PTN - NCL	PTN	Secreted Signaling	PMID: 28356350; PMID: 25620911
Fibroblast_03_Myo_MKI67	GE1	PTN	NCL	0.0314551469384758	0	PTN_NCL	PTN - NCL	PTN	Secreted Signaling	PMID: 28356350; PMID: 25620911
GE1	GE1	PTN	NCL	0.00790236561791979	0	PTN_NCL	PTN - NCL	PTN	Secreted Signaling	PMID: 28356350; PMID: 25620911
GE11	GE1	PTN	NCL	0.0111506805696094	0	PTN_NCL	PTN - NCL	PTN	Secreted Signaling	PMID: 28356350; PMID: 25620911
GE2	GE1	PTN	NCL	0.00996210470630127	0	PTN_NCL	PTN - NCL	PTN	Secreted Signaling	PMID: 28356350; PMID: 25620911
Astrocyte_01_CAV1	GE11	PTN	NCL	0.0512282377729754	0	PTN_NCL	PTN - NCL	PTN	Secreted Signaling	PMID: 28356350; PMID: 25620911
Astrocyte_02_MALAT1	GE11	PTN	NCL	0.0198086705427042	0	PTN_NCL	PTN - NCL	PTN	Secreted Signaling	PMID: 28356350; PMID: 25620911
Astrocyte_03_ROM1	GE11	PTN	NCL	0.0795246309225789	0	PTN_NCL	PTN - NCL	PTN	Secreted Signaling	PMID: 28356350; PMID: 25620911
Astrocyte_04_SCGB3A1	GE11	PTN	NCL	0.0840252207553042	0	PTN_NCL	PTN - NCL	PTN	Secreted Signaling	PMID: 28356350; PMID: 25620911
Astrocyte_05_HLA-DRB5	GE11	PTN	NCL	0.0848926708244938	0	PTN_NCL	PTN - NCL	PTN	Secreted Signaling	PMID: 28356350; PMID: 25620911
Astrocyte_06_CCL5	GE11	PTN	NCL	0.0192356717324813	0	PTN_NCL	PTN - NCL	PTN	Secreted Signaling	PMID: 28356350; PMID: 25620911
Fibroblast_01_Myo_HIGD1B	GE11	PTN	NCL	0.0166394036372035	0	PTN_NCL	PTN - NCL	PTN	Secreted Signaling	PMID: 28356350; PMID: 25620911
Fibroblast_03_Myo_MKI67	GE11	PTN	NCL	0.0294089781853422	0	PTN_NCL	PTN - NCL	PTN	Secreted Signaling	PMID: 28356350; PMID: 25620911
GE1	GE11	PTN	NCL	0.00737664492824523	0	PTN_NCL	PTN - NCL	PTN	Secreted Signaling	PMID: 28356350; PMID: 25620911
GE11	GE11	PTN	NCL	0.0104111269982399	0	PTN_NCL	PTN - NCL	PTN	Secreted Signaling	PMID: 28356350; PMID: 25620911
GE2	GE11	PTN	NCL	0.00930064035312166	0	PTN_NCL	PTN - NCL	PTN	Secreted Signaling	PMID: 28356350; PMID: 25620911
Astrocyte_01_CAV1	GE2	PTN	NCL	0.0542795688729486	0	PTN_NCL	PTN - NCL	PTN	Secreted Signaling	PMID: 28356350; PMID: 25620911
Astrocyte_02_MALAT1	GE2	PTN	NCL	0.0210300253559841	0	PTN_NCL	PTN - NCL	PTN	Secreted Signaling	PMID: 28356350; PMID: 25620911
Astrocyte_03_ROM1	GE2	PTN	NCL	0.0841119736795548	0	PTN_NCL	PTN - NCL	PTN	Secreted Signaling	PMID: 28356350; PMID: 25620911
Astrocyte_04_SCGB3A1	GE2	PTN	NCL	0.0888471192306514	0	PTN_NCL	PTN - NCL	PTN	Secreted Signaling	PMID: 28356350; PMID: 25620911
Astrocyte_05_HLA-DRB5	GE2	PTN	NCL	0.0897594709816057	0	PTN_NCL	PTN - NCL	PTN	Secreted Signaling	PMID: 28356350; PMID: 25620911
Astrocyte_06_CCL5	GE2	PTN	NCL	0.0204224329222497	0	PTN_NCL	PTN - NCL	PTN	Secreted Signaling	PMID: 28356350; PMID: 25620911
Fibroblast_01_Myo_HIGD1B	GE2	PTN	NCL	0.0176688715402466	0	PTN_NCL	PTN - NCL	PTN	Secreted Signaling	PMID: 28356350; PMID: 25620911
Fibroblast_03_Myo_MKI67	GE2	PTN	NCL	0.031203421232377	0	PTN_NCL	PTN - NCL	PTN	Secreted Signaling	PMID: 28356350; PMID: 25620911
GE1	GE2	PTN	NCL	0.00783760020530399	0	PTN_NCL	PTN - NCL	PTN	Secreted Signaling	PMID: 28356350; PMID: 25620911
GE11	GE2	PTN	NCL	0.0110595897202959	0	PTN_NCL	PTN - NCL	PTN	Secreted Signaling	PMID: 28356350; PMID: 25620911
GE2	GE2	PTN	NCL	0.00988062641486469	0	PTN_NCL	PTN - NCL	PTN	Secreted Signaling	PMID: 28356350; PMID: 25620911
Astrocyte_01_CAV1	GE8	PTN	NCL	0.0577130055269947	0	PTN_NCL	PTN - NCL	PTN	Secreted Signaling	PMID: 28356350; PMID: 25620911
Astrocyte_02_MALAT1	GE8	PTN	NCL	0.0224101107202415	0	PTN_NCL	PTN - NCL	PTN	Secreted Signaling	PMID: 28356350; PMID: 25620911
Astrocyte_03_ROM1	GE8	PTN	NCL	0.089254356202615	0	PTN_NCL	PTN - NCL	PTN	Secreted Signaling	PMID: 28356350; PMID: 25620911
Astrocyte_04_SCGB3A1	GE8	PTN	NCL	0.0942492056453677	0	PTN_NCL	PTN - NCL	PTN	Secreted Signaling	PMID: 28356350; PMID: 25620911
Astrocyte_05_HLA-DRB5	GE8	PTN	NCL	0.0952112335926049	0	PTN_NCL	PTN - NCL	PTN	Secreted Signaling	PMID: 28356350; PMID: 25620911
Astrocyte_06_CCL5	GE8	PTN	NCL	0.0217635317412856	0	PTN_NCL	PTN - NCL	PTN	Secreted Signaling	PMID: 28356350; PMID: 25620911
Fibroblast_01_Myo_HIGD1B	GE8	PTN	NCL	0.0188326260164639	0	PTN_NCL	PTN - NCL	PTN	Secreted Signaling	PMID: 28356350; PMID: 25620911
Fibroblast_03_Myo_MKI67	GE8	PTN	NCL	0.0332284701523612	0	PTN_NCL	PTN - NCL	PTN	Secreted Signaling	PMID: 28356350; PMID: 25620911
GE1	GE8	PTN	NCL	0.00835933150122322	0	PTN_NCL	PTN - NCL	PTN	Secreted Signaling	PMID: 28356350; PMID: 25620911
GE11	GE8	PTN	NCL	0.0117932521570509	0	PTN_NCL	PTN - NCL	PTN	Secreted Signaling	PMID: 28356350; PMID: 25620911
GE2	GE8	PTN	NCL	0.0105369130023508	0	PTN_NCL	PTN - NCL	PTN	Secreted Signaling	PMID: 28356350; PMID: 25620911
Astrocyte_01_CAV1	GE9	PTN	NCL	0.0558794024615281	0	PTN_NCL	PTN - NCL	PTN	Secreted Signaling	PMID: 28356350; PMID: 25620911
Astrocyte_02_MALAT1	GE9	PTN	NCL	0.0216723211610026	0	PTN_NCL	PTN - NCL	PTN	Secreted Signaling	PMID: 28356350; PMID: 25620911
Astrocyte_03_ROM1	GE9	PTN	NCL	0.0865106533761293	0	PTN_NCL	PTN - NCL	PTN	Secreted Signaling	PMID: 28356350; PMID: 25620911
Astrocyte_04_SCGB3A1	GE9	PTN	NCL	0.0913673634727383	0	PTN_NCL	PTN - NCL	PTN	Secreted Signaling	PMID: 28356350; PMID: 25620911
Astrocyte_05_HLA-DRB5	GE9	PTN	NCL	0.0923029733455639	0	PTN_NCL	PTN - NCL	PTN	Secreted Signaling	PMID: 28356350; PMID: 25620911
Astrocyte_06_CCL5	GE9	PTN	NCL	0.0210465706835136	0	PTN_NCL	PTN - NCL	PTN	Secreted Signaling	PMID: 28356350; PMID: 25620911
Fibroblast_01_Myo_HIGD1B	GE9	PTN	NCL	0.0182104210658937	0	PTN_NCL	PTN - NCL	PTN	Secreted Signaling	PMID: 28356350; PMID: 25620911
Fibroblast_03_Myo_MKI67	GE9	PTN	NCL	0.0321462284729198	0	PTN_NCL	PTN - NCL	PTN	Secreted Signaling	PMID: 28356350; PMID: 25620911
GE1	GE9	PTN	NCL	0.0080803006489756	0	PTN_NCL	PTN - NCL	PTN	Secreted Signaling	PMID: 28356350; PMID: 25620911
GE11	GE9	PTN	NCL	0.0114009163466317	0	PTN_NCL	PTN - NCL	PTN	Secreted Signaling	PMID: 28356350; PMID: 25620911
GE2	GE9	PTN	NCL	0.0101859420500869	0	PTN_NCL	PTN - NCL	PTN	Secreted Signaling	PMID: 28356350; PMID: 25620911
Astrocyte_01_CAV1	Macrophage_06_C3	PTN	NCL	0.032172212250537	0	PTN_NCL	PTN - NCL	PTN	Secreted Signaling	PMID: 28356350; PMID: 25620911
Astrocyte_02_MALAT1	Macrophage_06_C3	PTN	NCL	0.0122888040970127	0	PTN_NCL	PTN - NCL	PTN	Secreted Signaling	PMID: 28356350; PMID: 25620911
Astrocyte_03_ROM1	Macrophage_06_C3	PTN	NCL	0.0505031195019884	0	PTN_NCL	PTN - NCL	PTN	Secreted Signaling	PMID: 28356350; PMID: 25620911
Astrocyte_04_SCGB3A1	Macrophage_06_C3	PTN	NCL	0.0534566602393944	0	PTN_NCL	PTN - NCL	PTN	Secreted Signaling	PMID: 28356350; PMID: 25620911
Astrocyte_05_HLA-DRB5	Macrophage_06_C3	PTN	NCL	0.0540271440012771	0	PTN_NCL	PTN - NCL	PTN	Secreted Signaling	PMID: 28356350; PMID: 25620911
Astrocyte_06_CCL5	Macrophage_06_C3	PTN	NCL	0.0119306822925219	0	PTN_NCL	PTN - NCL	PTN	Secreted Signaling	PMID: 28356350; PMID: 25620911
Fibroblast_01_Myo_HIGD1B	Macrophage_06_C3	PTN	NCL	0.0103100151256635	0	PTN_NCL	PTN - NCL	PTN	Secreted Signaling	PMID: 28356350; PMID: 25620911
Fibroblast_03_Myo_MKI67	Macrophage_06_C3	PTN	NCL	0.0183126846548539	0	PTN_NCL	PTN - NCL	PTN	Secreted Signaling	PMID: 28356350; PMID: 25620911
GE1	Macrophage_06_C3	PTN	NCL	0.00455435743474523	0	PTN_NCL	PTN - NCL	PTN	Secreted Signaling	PMID: 28356350; PMID: 25620911
GE11	Macrophage_06_C3	PTN	NCL	0.00643538050812925	0	PTN_NCL	PTN - NCL	PTN	Secreted Signaling	PMID: 28356350; PMID: 25620911
GE2	Macrophage_06_C3	PTN	NCL	0.00574649813294279	0	PTN_NCL	PTN - NCL	PTN	Secreted Signaling	PMID: 28356350; PMID: 25620911
CD4T_04_SNORD3A	Endothelial_02_PTMAP2	GZMA	F2R	0.00299199869674908	0	GZMA_F2R	GZMA - F2R	PARs	Secreted Signaling	KEGG: hsa04080
CD4T_04_SNORD3A	Fibroblast_01_Myo_HIGD1B	GZMA	F2R	0.00330030292638175	0	GZMA_F2R	GZMA - F2R	PARs	Secreted Signaling	KEGG: hsa04080
CD4T_04_SNORD3A	Fibroblast_02_Myo_COL10A1	GZMA	F2R	0.0032523742440876	0	GZMA_F2R	GZMA - F2R	PARs	Secreted Signaling	KEGG: hsa04080
CD4T_04_SNORD3A	Fibroblast_03_Myo_MKI67	GZMA	F2R	0.00304060260723788	0	GZMA_F2R	GZMA - F2R	PARs	Secreted Signaling	KEGG: hsa04080
CD4T_04_SNORD3A	Fibroblast_03_Myo_MKI67	GZMA	PARD3	0.000852569371638568	0	GZMA_PARD3	GZMA - PARD3	PARs	Secreted Signaling	KEGG: hsa04080
CD4T_04_SNORD3A	GE8	GZMA	PARD3	0.00183993638603137	0	GZMA_PARD3	GZMA - PARD3	PARs	Secreted Signaling	KEGG: hsa04080
CD4T_04_SNORD3A	GE9	GZMA	PARD3	0.00178473938416971	0	GZMA_PARD3	GZMA - PARD3	PARs	Secreted Signaling	KEGG: hsa04080
Astrocyte_01_CAV1	Astrocyte_04_SCGB3A1	PSAP	GPR37L1	0.0630081790261652	0	PSAP_GPR37L1	PSAP - GPR37L1	PSAP	Secreted Signaling	PMID: 23690594
Astrocyte_02_MALAT1	Astrocyte_04_SCGB3A1	PSAP	GPR37L1	0.0551352201928781	0	PSAP_GPR37L1	PSAP - GPR37L1	PSAP	Secreted Signaling	PMID: 23690594
Astrocyte_03_ROM1	Astrocyte_04_SCGB3A1	PSAP	GPR37L1	0.0645379972277128	0	PSAP_GPR37L1	PSAP - GPR37L1	PSAP	Secreted Signaling	PMID: 23690594
Astrocyte_04_SCGB3A1	Astrocyte_04_SCGB3A1	PSAP	GPR37L1	0.0588622911598382	0	PSAP_GPR37L1	PSAP - GPR37L1	PSAP	Secreted Signaling	PMID: 23690594
Astrocyte_05_HLA-DRB5	Astrocyte_04_SCGB3A1	PSAP	GPR37L1	0.067424289953704	0	PSAP_GPR37L1	PSAP - GPR37L1	PSAP	Secreted Signaling	PMID: 23690594
Astrocyte_06_CCL5	Astrocyte_04_SCGB3A1	PSAP	GPR37L1	0.057762220662093	0	PSAP_GPR37L1	PSAP - GPR37L1	PSAP	Secreted Signaling	PMID: 23690594
B_04_PTMAP2	Astrocyte_04_SCGB3A1	PSAP	GPR37L1	0.026343892341406	0	PSAP_GPR37L1	PSAP - GPR37L1	PSAP	Secreted Signaling	PMID: 23690594
CD4T_04_SNORD3A	Astrocyte_04_SCGB3A1	PSAP	GPR37L1	0.0229917349017594	0	PSAP_GPR37L1	PSAP - GPR37L1	PSAP	Secreted Signaling	PMID: 23690594
Endothelial_02_PTMAP2	Astrocyte_04_SCGB3A1	PSAP	GPR37L1	0.0436325240474355	0	PSAP_GPR37L1	PSAP - GPR37L1	PSAP	Secreted Signaling	PMID: 23690594
Fibroblast_01_Myo_HIGD1B	Astrocyte_04_SCGB3A1	PSAP	GPR37L1	0.0456287123124427	0	PSAP_GPR37L1	PSAP - GPR37L1	PSAP	Secreted Signaling	PMID: 23690594
Fibroblast_02_Myo_COL10A1	Astrocyte_04_SCGB3A1	PSAP	GPR37L1	0.0414380563899176	0	PSAP_GPR37L1	PSAP - GPR37L1	PSAP	Secreted Signaling	PMID: 23690594
Fibroblast_03_Myo_MKI67	Astrocyte_04_SCGB3A1	PSAP	GPR37L1	0.0411766269191676	0	PSAP_GPR37L1	PSAP - GPR37L1	PSAP	Secreted Signaling	PMID: 23690594
GE1	Astrocyte_04_SCGB3A1	PSAP	GPR37L1	0.0341641167581262	0	PSAP_GPR37L1	PSAP - GPR37L1	PSAP	Secreted Signaling	PMID: 23690594
GE11	Astrocyte_04_SCGB3A1	PSAP	GPR37L1	0.0348109614324431	0	PSAP_GPR37L1	PSAP - GPR37L1	PSAP	Secreted Signaling	PMID: 23690594
GE2	Astrocyte_04_SCGB3A1	PSAP	GPR37L1	0.0328772565955127	0	PSAP_GPR37L1	PSAP - GPR37L1	PSAP	Secreted Signaling	PMID: 23690594
GE8	Astrocyte_04_SCGB3A1	PSAP	GPR37L1	0.0470735364579049	0	PSAP_GPR37L1	PSAP - GPR37L1	PSAP	Secreted Signaling	PMID: 23690594
GE9	Astrocyte_04_SCGB3A1	PSAP	GPR37L1	0.054925072820849	0	PSAP_GPR37L1	PSAP - GPR37L1	PSAP	Secreted Signaling	PMID: 23690594
Macrophage_06_C3	Astrocyte_04_SCGB3A1	PSAP	GPR37L1	0.0699985154225071	0	PSAP_GPR37L1	PSAP - GPR37L1	PSAP	Secreted Signaling	PMID: 23690594
Neurophil_01_GOS2	Astrocyte_04_SCGB3A1	PSAP	GPR37L1	0.0399460905463702	0	PSAP_GPR37L1	PSAP - GPR37L1	PSAP	Secreted Signaling	PMID: 23690594
Astrocyte_01_CAV1	Astrocyte_01_CAV1	PSAP	GPR37	0.103970921841775	0	PSAP_GPR37	PSAP - GPR37	PSAP	Secreted Signaling	PMID: 23690594
Astrocyte_02_MALAT1	Astrocyte_01_CAV1	PSAP	GPR37	0.0914793208695203	0	PSAP_GPR37	PSAP - GPR37	PSAP	Secreted Signaling	PMID: 23690594
Astrocyte_03_ROM1	Astrocyte_01_CAV1	PSAP	GPR37	0.106382383493626	0	PSAP_GPR37	PSAP - GPR37	PSAP	Secreted Signaling	PMID: 23690594
Astrocyte_04_SCGB3A1	Astrocyte_01_CAV1	PSAP	GPR37	0.0974099239665259	0	PSAP_GPR37	PSAP - GPR37	PSAP	Secreted Signaling	PMID: 23690594
Astrocyte_05_HLA-DRB5	Astrocyte_01_CAV1	PSAP	GPR37	0.110918166235554	0	PSAP_GPR37	PSAP - GPR37	PSAP	Secreted Signaling	PMID: 23690594
Astrocyte_06_CCL5	Astrocyte_01_CAV1	PSAP	GPR37	0.0956626681080444	0	PSAP_GPR37	PSAP - GPR37	PSAP	Secreted Signaling	PMID: 23690594
B_04_PTMAP2	Astrocyte_01_CAV1	PSAP	GPR37	0.0446052387577156	0	PSAP_GPR37	PSAP - GPR37	PSAP	Secreted Signaling	PMID: 23690594
CD4T_04_SNORD3A	Astrocyte_01_CAV1	PSAP	GPR37	0.0390225257398633	0	PSAP_GPR37	PSAP - GPR37	PSAP	Secreted Signaling	PMID: 23690594
Endothelial_02_PTMAP2	Astrocyte_01_CAV1	PSAP	GPR37	0.0729799136588025	0	PSAP_GPR37	PSAP - GPR37	PSAP	Secreted Signaling	PMID: 23690594
Fibroblast_01_Myo_HIGD1B	Astrocyte_01_CAV1	PSAP	GPR37	0.076211751597473	0	PSAP_GPR37	PSAP - GPR37	PSAP	Secreted Signaling	PMID: 23690594
Fibroblast_02_Myo_COL10A1	Astrocyte_01_CAV1	PSAP	GPR37	0.0694165731590927	0	PSAP_GPR37	PSAP - GPR37	PSAP	Secreted Signaling	PMID: 23690594
Fibroblast_03_Myo_MKI67	Astrocyte_01_CAV1	PSAP	GPR37	0.0689913338064495	0	PSAP_GPR37	PSAP - GPR37	PSAP	Secreted Signaling	PMID: 23690594
GE1	Astrocyte_01_CAV1	PSAP	GPR37	0.0575260904506511	0	PSAP_GPR37	PSAP - GPR37	PSAP	Secreted Signaling	PMID: 23690594
GE11	Astrocyte_01_CAV1	PSAP	GPR37	0.0585884262608734	0	PSAP_GPR37	PSAP - GPR37	PSAP	Secreted Signaling	PMID: 23690594
GE2	Astrocyte_01_CAV1	PSAP	GPR37	0.0554097385320373	0	PSAP_GPR37	PSAP - GPR37	PSAP	Secreted Signaling	PMID: 23690594
GE8	Astrocyte_01_CAV1	PSAP	GPR37	0.0785452812930268	0	PSAP_GPR37	PSAP - GPR37	PSAP	Secreted Signaling	PMID: 23690594
GE9	Astrocyte_01_CAV1	PSAP	GPR37	0.0911440107860122	0	PSAP_GPR37	PSAP - GPR37	PSAP	Secreted Signaling	PMID: 23690594
Macrophage_06_C3	Astrocyte_01_CAV1	PSAP	GPR37	0.114948285403346	0	PSAP_GPR37	PSAP - GPR37	PSAP	Secreted Signaling	PMID: 23690594
Neurophil_01_GOS2	Astrocyte_01_CAV1	PSAP	GPR37	0.0669876462422486	0	PSAP_GPR37	PSAP - GPR37	PSAP	Secreted Signaling	PMID: 23690594
Astrocyte_01_CAV1	Astrocyte_03_ROM1	PSAP	GPR37	0.0989826548033372	0	PSAP_GPR37	PSAP - GPR37	PSAP	Secreted Signaling	PMID: 23690594
Astrocyte_02_MALAT1	Astrocyte_03_ROM1	PSAP	GPR37	0.0870321577353627	0	PSAP_GPR37	PSAP - GPR37	PSAP	Secreted Signaling	PMID: 23690594
Astrocyte_03_ROM1	Astrocyte_03_ROM1	PSAP	GPR37	0.101291499339105	0	PSAP_GPR37	PSAP - GPR37	PSAP	Secreted Signaling	PMID: 23690594
Astrocyte_04_SCGB3A1	Astrocyte_03_ROM1	PSAP	GPR37	0.0927038699107354	0	PSAP_GPR37	PSAP - GPR37	PSAP	Secreted Signaling	PMID: 23690594
Astrocyte_05_HLA-DRB5	Astrocyte_03_ROM1	PSAP	GPR37	0.105635882857865	0	PSAP_GPR37	PSAP - GPR37	PSAP	Secreted Signaling	PMID: 23690594
Astrocyte_06_CCL5	Astrocyte_03_ROM1	PSAP	GPR37	0.0910325135648932	0	PSAP_GPR37	PSAP - GPR37	PSAP	Secreted Signaling	PMID: 23690594
B_04_PTMAP2	Astrocyte_03_ROM1	PSAP	GPR37	0.0423306331123798	0	PSAP_GPR37	PSAP - GPR37	PSAP	Secreted Signaling	PMID: 23690594
CD4T_04_SNORD3A	Astrocyte_03_ROM1	PSAP	GPR37	0.0370215741493446	0	PSAP_GPR37	PSAP - GPR37	PSAP	Secreted Signaling	PMID: 23690594
Endothelial_02_PTMAP2	Astrocyte_03_ROM1	PSAP	GPR37	0.0693634166149907	0	PSAP_GPR37	PSAP - GPR37	PSAP	Secreted Signaling	PMID: 23690594
Fibroblast_01_Myo_HIGD1B	Astrocyte_03_ROM1	PSAP	GPR37	0.0724476179326697	0	PSAP_GPR37	PSAP - GPR37	PSAP	Secreted Signaling	PMID: 23690594
Fibroblast_02_Myo_COL10A1	Astrocyte_03_ROM1	PSAP	GPR37	0.0659640914080535	0	PSAP_GPR37	PSAP - GPR37	PSAP	Secreted Signaling	PMID: 23690594
Fibroblast_03_Myo_MKI67	Astrocyte_03_ROM1	PSAP	GPR37	0.0655585116687736	0	PSAP_GPR37	PSAP - GPR37	PSAP	Secreted Signaling	PMID: 23690594
GE1	Astrocyte_03_ROM1	PSAP	GPR37	0.0546302728765137	0	PSAP_GPR37	PSAP - GPR37	PSAP	Secreted Signaling	PMID: 23690594
GE11	Astrocyte_03_ROM1	PSAP	GPR37	0.0556422887606681	0	PSAP_GPR37	PSAP - GPR37	PSAP	Secreted Signaling	PMID: 23690594
GE2	Astrocyte_03_ROM1	PSAP	GPR37	0.0526145089831428	0	PSAP_GPR37	PSAP - GPR37	PSAP	Secreted Signaling	PMID: 23690594
GE8	Astrocyte_03_ROM1	PSAP	GPR37	0.0746752101814083	0	PSAP_GPR37	PSAP - GPR37	PSAP	Secreted Signaling	PMID: 23690594
GE9	Astrocyte_03_ROM1	PSAP	GPR37	0.0867115925869373	0	PSAP_GPR37	PSAP - GPR37	PSAP	Secreted Signaling	PMID: 23690594
Macrophage_06_C3	Astrocyte_03_ROM1	PSAP	GPR37	0.109497712087219	0	PSAP_GPR37	PSAP - GPR37	PSAP	Secreted Signaling	PMID: 23690594
Neurophil_01_GOS2	Astrocyte_03_ROM1	PSAP	GPR37	0.0636477063937947	0	PSAP_GPR37	PSAP - GPR37	PSAP	Secreted Signaling	PMID: 23690594
Astrocyte_01_CAV1	Astrocyte_04_SCGB3A1	PSAP	GPR37	0.136896821108238	0	PSAP_GPR37	PSAP - GPR37	PSAP	Secreted Signaling	PMID: 23690594
Astrocyte_02_MALAT1	Astrocyte_04_SCGB3A1	PSAP	GPR37	0.120983464332633	0	PSAP_GPR37	PSAP - GPR37	PSAP	Secreted Signaling	PMID: 23690594
Astrocyte_03_ROM1	Astrocyte_04_SCGB3A1	PSAP	GPR37	0.139952674094411	0	PSAP_GPR37	PSAP - GPR37	PSAP	Secreted Signaling	PMID: 23690594
Astrocyte_04_SCGB3A1	Astrocyte_04_SCGB3A1	PSAP	GPR37	0.128556165030626	0	PSAP_GPR37	PSAP - GPR37	PSAP	Secreted Signaling	PMID: 23690594
Astrocyte_05_HLA-DRB5	Astrocyte_04_SCGB3A1	PSAP	GPR37	0.145686431266411	0	PSAP_GPR37	PSAP - GPR37	PSAP	Secreted Signaling	PMID: 23690594
Astrocyte_06_CCL5	Astrocyte_04_SCGB3A1	PSAP	GPR37	0.126328427841644	0	PSAP_GPR37	PSAP - GPR37	PSAP	Secreted Signaling	PMID: 23690594
B_04_PTMAP2	Astrocyte_04_SCGB3A1	PSAP	GPR37	0.0599896729213074	0	PSAP_GPR37	PSAP - GPR37	PSAP	Secreted Signaling	PMID: 23690594
CD4T_04_SNORD3A	Astrocyte_04_SCGB3A1	PSAP	GPR37	0.0525874552445296	0	PSAP_GPR37	PSAP - GPR37	PSAP	Secreted Signaling	PMID: 23690594
Endothelial_02_PTMAP2	Astrocyte_04_SCGB3A1	PSAP	GPR37	0.0971556257972514	0	PSAP_GPR37	PSAP - GPR37	PSAP	Secreted Signaling	PMID: 23690594
Fibroblast_01_Myo_HIGD1B	Astrocyte_04_SCGB3A1	PSAP	GPR37	0.101341022876473	0	PSAP_GPR37	PSAP - GPR37	PSAP	Secreted Signaling	PMID: 23690594
Fibroblast_02_Myo_COL10A1	Astrocyte_04_SCGB3A1	PSAP	GPR37	0.0925296959689103	0	PSAP_GPR37	PSAP - GPR37	PSAP	Secreted Signaling	PMID: 23690594
Fibroblast_03_Myo_MKI67	Astrocyte_04_SCGB3A1	PSAP	GPR37	0.0919768621472497	0	PSAP_GPR37	PSAP - GPR37	PSAP	Secreted Signaling	PMID: 23690594
GE1	Astrocyte_04_SCGB3A1	PSAP	GPR37	0.0770077499592828	0	PSAP_GPR37	PSAP - GPR37	PSAP	Secreted Signaling	PMID: 23690594
GE11	Astrocyte_04_SCGB3A1	PSAP	GPR37	0.0783999266662501	0	PSAP_GPR37	PSAP - GPR37	PSAP	Secreted Signaling	PMID: 23690594
GE2	Astrocyte_04_SCGB3A1	PSAP	GPR37	0.0742311291744781	0	PSAP_GPR37	PSAP - GPR37	PSAP	Secreted Signaling	PMID: 23690594
GE8	Astrocyte_04_SCGB3A1	PSAP	GPR37	0.104357066214083	0	PSAP_GPR37	PSAP - GPR37	PSAP	Secreted Signaling	PMID: 23690594
GE9	Astrocyte_04_SCGB3A1	PSAP	GPR37	0.120554359282967	0	PSAP_GPR37	PSAP - GPR37	PSAP	Secreted Signaling	PMID: 23690594
Macrophage_06_C3	Astrocyte_04_SCGB3A1	PSAP	GPR37	0.150765606993543	0	PSAP_GPR37	PSAP - GPR37	PSAP	Secreted Signaling	PMID: 23690594
Neurophil_01_GOS2	Astrocyte_04_SCGB3A1	PSAP	GPR37	0.0893696957175683	0	PSAP_GPR37	PSAP - GPR37	PSAP	Secreted Signaling	PMID: 23690594
Astrocyte_01_CAV1	Astrocyte_05_HLA-DRB5	PSAP	GPR37	0.0848275211672174	0	PSAP_GPR37	PSAP - GPR37	PSAP	Secreted Signaling	PMID: 23690594
Astrocyte_02_MALAT1	Astrocyte_05_HLA-DRB5	PSAP	GPR37	0.0744448168835113	0	PSAP_GPR37	PSAP - GPR37	PSAP	Secreted Signaling	PMID: 23690594
Astrocyte_03_ROM1	Astrocyte_05_HLA-DRB5	PSAP	GPR37	0.0868380085243953	0	PSAP_GPR37	PSAP - GPR37	PSAP	Secreted Signaling	PMID: 23690594
Astrocyte_04_SCGB3A1	Astrocyte_05_HLA-DRB5	PSAP	GPR37	0.0793675480534927	0	PSAP_GPR37	PSAP - GPR37	PSAP	Secreted Signaling	PMID: 23690594
Astrocyte_05_HLA-DRB5	Astrocyte_05_HLA-DRB5	PSAP	GPR37	0.0906249941773069	0	PSAP_GPR37	PSAP - GPR37	PSAP	Secreted Signaling	PMID: 23690594
Astrocyte_06_CCL5	Astrocyte_05_HLA-DRB5	PSAP	GPR37	0.077915983684573	0	PSAP_GPR37	PSAP - GPR37	PSAP	Secreted Signaling	PMID: 23690594
B_04_PTMAP2	Astrocyte_05_HLA-DRB5	PSAP	GPR37	0.0359538076215079	0	PSAP_GPR37	PSAP - GPR37	PSAP	Secreted Signaling	PMID: 23690594
CD4T_04_SNORD3A	Astrocyte_05_HLA-DRB5	PSAP	GPR37	0.0314182845145691	0	PSAP_GPR37	PSAP - GPR37	PSAP	Secreted Signaling	PMID: 23690594
Endothelial_02_PTMAP2	Astrocyte_05_HLA-DRB5	PSAP	GPR37	0.0591658755587039	0	PSAP_GPR37	PSAP - GPR37	PSAP	Secreted Signaling	PMID: 23690594
Fibroblast_01_Myo_HIGD1B	Astrocyte_05_HLA-DRB5	PSAP	GPR37	0.0618267729473619	0	PSAP_GPR37	PSAP - GPR37	PSAP	Secreted Signaling	PMID: 23690594
Fibroblast_02_Myo_COL10A1	Astrocyte_05_HLA-DRB5	PSAP	GPR37	0.0562361069689331	0	PSAP_GPR37	PSAP - GPR37	PSAP	Secreted Signaling	PMID: 23690594
Fibroblast_03_Myo_MKI67	Astrocyte_05_HLA-DRB5	PSAP	GPR37	0.0558867608760224	0	PSAP_GPR37	PSAP - GPR37	PSAP	Secreted Signaling	PMID: 23690594
GE1	Astrocyte_05_HLA-DRB5	PSAP	GPR37	0.0464905372079557	0	PSAP_GPR37	PSAP - GPR37	PSAP	Secreted Signaling	PMID: 23690594
GE11	Astrocyte_05_HLA-DRB5	PSAP	GPR37	0.0473593198112828	0	PSAP_GPR37	PSAP - GPR37	PSAP	Secreted Signaling	PMID: 23690594
GE2	Astrocyte_05_HLA-DRB5	PSAP	GPR37	0.0447608952171625	0	PSAP_GPR37	PSAP - GPR37	PSAP	Secreted Signaling	PMID: 23690594
GE8	Astrocyte_05_HLA-DRB5	PSAP	GPR37	0.0637502441418939	0	PSAP_GPR37	PSAP - GPR37	PSAP	Secreted Signaling	PMID: 23690594
GE9	Astrocyte_05_HLA-DRB5	PSAP	GPR37	0.0741668482435166	0	PSAP_GPR37	PSAP - GPR37	PSAP	Secreted Signaling	PMID: 23690594
Macrophage_06_C3	Astrocyte_05_HLA-DRB5	PSAP	GPR37	0.0939957306110718	0	PSAP_GPR37	PSAP - GPR37	PSAP	Secreted Signaling	PMID: 23690594
Neurophil_01_GOS2	Astrocyte_05_HLA-DRB5	PSAP	GPR37	0.054241490552836	0	PSAP_GPR37	PSAP - GPR37	PSAP	Secreted Signaling	PMID: 23690594
Astrocyte_01_CAV1	Astrocyte_06_CCL5	PSAP	GPR37	0.0309818438274192	0	PSAP_GPR37	PSAP - GPR37	PSAP	Secreted Signaling	PMID: 23690594
Astrocyte_02_MALAT1	Astrocyte_06_CCL5	PSAP	GPR37	0.0269953272194645	0	PSAP_GPR37	PSAP - GPR37	PSAP	Secreted Signaling	PMID: 23690594
Astrocyte_03_ROM1	Astrocyte_06_CCL5	PSAP	GPR37	0.0317604302596294	0	PSAP_GPR37	PSAP - GPR37	PSAP	Secreted Signaling	PMID: 23690594
Astrocyte_04_SCGB3A1	Astrocyte_06_CCL5	PSAP	GPR37	0.0288783155210348	0	PSAP_GPR37	PSAP - GPR37	PSAP	Secreted Signaling	PMID: 23690594
Astrocyte_05_HLA-DRB5	Astrocyte_06_CCL5	PSAP	GPR37	0.0332329089788104	0	PSAP_GPR37	PSAP - GPR37	PSAP	Secreted Signaling	PMID: 23690594
Astrocyte_06_CCL5	Astrocyte_06_CCL5	PSAP	GPR37	0.0283217488691352	0	PSAP_GPR37	PSAP - GPR37	PSAP	Secreted Signaling	PMID: 23690594
B_04_PTMAP2	Astrocyte_06_CCL5	PSAP	GPR37	0.0127009812059085	0	PSAP_GPR37	PSAP - GPR37	PSAP	Secreted Signaling	PMID: 23690594
CD4T_04_SNORD3A	Astrocyte_06_CCL5	PSAP	GPR37	0.0110651021081321	0	PSAP_GPR37	PSAP - GPR37	PSAP	Secreted Signaling	PMID: 23690594
Endothelial_02_PTMAP2	Astrocyte_06_CCL5	PSAP	GPR37	0.0212314551111647	0	PSAP_GPR37	PSAP - GPR37	PSAP	Secreted Signaling	PMID: 23690594
Fibroblast_01_Myo_HIGD1B	Astrocyte_06_CCL5	PSAP	GPR37	0.0222266124931499	0	PSAP_GPR37	PSAP - GPR37	PSAP	Secreted Signaling	PMID: 23690594
Fibroblast_02_Myo_COL10A1	Astrocyte_06_CCL5	PSAP	GPR37	0.0201399079744144	0	PSAP_GPR37	PSAP - GPR37	PSAP	Secreted Signaling	PMID: 23690594
Fibroblast_03_Myo_MKI67	Astrocyte_06_CCL5	PSAP	GPR37	0.020010041915303	0	PSAP_GPR37	PSAP - GPR37	PSAP	Secreted Signaling	PMID: 23690594
GE1	Astrocyte_06_CCL5	PSAP	GPR37	0.0165400851711065	0	PSAP_GPR37	PSAP - GPR37	PSAP	Secreted Signaling	PMID: 23690594
GE11	Astrocyte_06_CCL5	PSAP	GPR37	0.0168590706744812	0	PSAP_GPR37	PSAP - GPR37	PSAP	Secreted Signaling	PMID: 23690594
GE2	Astrocyte_06_CCL5	PSAP	GPR37	0.0159061368912855	0	PSAP_GPR37	PSAP - GPR37	PSAP	Secreted Signaling	PMID: 23690594
GE8	Astrocyte_06_CCL5	PSAP	GPR37	0.0229482319644271	0	PSAP_GPR37	PSAP - GPR37	PSAP	Secreted Signaling	PMID: 23690594
GE9	Astrocyte_06_CCL5	PSAP	GPR37	0.0268893824755086	0	PSAP_GPR37	PSAP - GPR37	PSAP	Secreted Signaling	PMID: 23690594
Macrophage_06_C3	Astrocyte_06_CCL5	PSAP	GPR37	0.0345500875750896	0	PSAP_GPR37	PSAP - GPR37	PSAP	Secreted Signaling	PMID: 23690594
Neurophil_01_GOS2	Astrocyte_06_CCL5	PSAP	GPR37	0.0193992570266381	0	PSAP_GPR37	PSAP - GPR37	PSAP	Secreted Signaling	PMID: 23690594

## Sheet: Sheet10
Table S10. Interaction network of prognosis-associated LRs in CM5. Related to Figure 4.
source	target	ligand	receptor	prob	pval	interaction_name	interaction_name_2	pathway_name	annotation	evidence
Endothelial_08_CCL21	GE12	IGF1	IGF1R	0.000972826862088304	0	IGF1_IGF1R	IGF1 - IGF1R	IGF	Secreted Signaling	PMID: 14604834
Endothelial_08_CCL21	Endothelial_03_VCAM1	IGF1	ITGA6_ITGB4	0.00211432887514932	0	IGF1_ITGA6_ITGB4	IGF1 - (ITGA6+ITGB4)	IGF	Secreted Signaling	PMID: 28190785; PMID: 28873464
GE12	Fibroblast_06_Alveolar_MS4A7	IL7	IL7R_IL2RG	0.00133200311960222	0	IL7_IL7R_IL2RG	IL7 - (IL7R+IL2RG)	IL2	Secreted Signaling	KEGG: hsa04060
GE12	Macrophage_01_LGMN	IL7	IL7R_IL2RG	0.00101712498743056	0	IL7_IL7R_IL2RG	IL7 - (IL7R+IL2RG)	IL2	Secreted Signaling	KEGG: hsa04060
GE12	Macrophage_03_MARCO	IL7	IL7R_IL2RG	0.00147738506706223	0	IL7_IL7R_IL2RG	IL7 - (IL7R+IL2RG)	IL2	Secreted Signaling	KEGG: hsa04060
Macrophage_03_MARCO	Macrophage_01_LGMN	RETN	TLR4	0.0119781175625801	0	RETN_TLR4	RETN - TLR4	RESISTIN	Secreted Signaling	PMID: 30809105
Mast_02_CHIT1	Macrophage_01_LGMN	RETN	TLR4	0.00346161015389934	0	RETN_TLR4	RETN - TLR4	RESISTIN	Secreted Signaling	PMID: 30809105
Macrophage_03_MARCO	Macrophage_03_MARCO	RETN	TLR4	0.0110333701107217	0	RETN_TLR4	RETN - TLR4	RESISTIN	Secreted Signaling	PMID: 30809105
Mast_02_CHIT1	Macrophage_03_MARCO	RETN	TLR4	0.00318641700125425	0	RETN_TLR4	RETN - TLR4	RESISTIN	Secreted Signaling	PMID: 30809105
Macrophage_03_MARCO	Endothelial_01_FCN3	RETN	CAP1	0.0154996523843903	0	RETN_CAP1	RETN - CAP1	RESISTIN	Secreted Signaling	PMID: 30809105
Macrophage_03_MARCO	Endothelial_03_VCAM1	RETN	CAP1	0.0183979180774986	0	RETN_CAP1	RETN - CAP1	RESISTIN	Secreted Signaling	PMID: 30809105
Macrophage_03_MARCO	Endothelial_04_DKK2	RETN	CAP1	0.016386353165769	0	RETN_CAP1	RETN - CAP1	RESISTIN	Secreted Signaling	PMID: 30809105
Macrophage_03_MARCO	Endothelial_06_CD68	RETN	CAP1	0.0380999432451153	0	RETN_CAP1	RETN - CAP1	RESISTIN	Secreted Signaling	PMID: 30809105
Mast_02_CHIT1	Endothelial_06_CD68	RETN	CAP1	0.0112216173580691	0.04	RETN_CAP1	RETN - CAP1	RESISTIN	Secreted Signaling	PMID: 30809105
Macrophage_03_MARCO	Endothelial_08_CCL21	RETN	CAP1	0.0161884133232737	0	RETN_CAP1	RETN - CAP1	RESISTIN	Secreted Signaling	PMID: 30809105
Macrophage_03_MARCO	Fibroblast_06_Alveolar_MS4A7	RETN	CAP1	0.0563486323451659	0	RETN_CAP1	RETN - CAP1	RESISTIN	Secreted Signaling	PMID: 30809105
Mast_02_CHIT1	Fibroblast_06_Alveolar_MS4A7	RETN	CAP1	0.0168215599137456	0	RETN_CAP1	RETN - CAP1	RESISTIN	Secreted Signaling	PMID: 30809105
Macrophage_03_MARCO	GE1	RETN	CAP1	0.0345126783800928	0	RETN_CAP1	RETN - CAP1	RESISTIN	Secreted Signaling	PMID: 30809105
Macrophage_03_MARCO	GE12	RETN	CAP1	0.0165015097206453	0	RETN_CAP1	RETN - CAP1	RESISTIN	Secreted Signaling	PMID: 30809105
Macrophage_03_MARCO	Macrophage_01_LGMN	RETN	CAP1	0.0593383866207122	0	RETN_CAP1	RETN - CAP1	RESISTIN	Secreted Signaling	PMID: 30809105
Mast_02_CHIT1	Macrophage_01_LGMN	RETN	CAP1	0.0177535374285649	0	RETN_CAP1	RETN - CAP1	RESISTIN	Secreted Signaling	PMID: 30809105
Macrophage_03_MARCO	Macrophage_03_MARCO	RETN	CAP1	0.0792131703110542	0	RETN_CAP1	RETN - CAP1	RESISTIN	Secreted Signaling	PMID: 30809105
Mast_02_CHIT1	Macrophage_03_MARCO	RETN	CAP1	0.0240561023923219	0	RETN_CAP1	RETN - CAP1	RESISTIN	Secreted Signaling	PMID: 30809105
Macrophage_03_MARCO	Macrophage_05_CSTB	RETN	CAP1	0.027113056209743	0	RETN_CAP1	RETN - CAP1	RESISTIN	Secreted Signaling	PMID: 30809105
Macrophage_03_MARCO	Mast_02_CHIT1	RETN	CAP1	0.0724307595563077	0	RETN_CAP1	RETN - CAP1	RESISTIN	Secreted Signaling	PMID: 30809105
Mast_02_CHIT1	Mast_02_CHIT1	RETN	CAP1	0.0218841218666719	0	RETN_CAP1	RETN - CAP1	RESISTIN	Secreted Signaling	PMID: 30809105
GE1	Mast_02_CHIT1	KITLG	KIT	0.00604980030268479	0	KITL_KIT	KITL - KIT	KIT	Secreted Signaling	KEGG: hsa04080
Endothelial_08_CCL21	Macrophage_01_LGMN	RARRES2	CMKLR1	0.00227424315520622	0	RARRES2_CMKLR1	RARRES2 - CMKLR1	CHEMERIN	Secreted Signaling	PMID: 24671882
Fibroblast_06_Alveolar_MS4A7	Macrophage_01_LGMN	RARRES2	CMKLR1	0.00302572914609073	0	RARRES2_CMKLR1	RARRES2 - CMKLR1	CHEMERIN	Secreted Signaling	PMID: 24671882
GE12	Macrophage_01_LGMN	RARRES2	CMKLR1	0.00192294581945511	0	RARRES2_CMKLR1	RARRES2 - CMKLR1	CHEMERIN	Secreted Signaling	PMID: 24671882
GE1	Endothelial_06_CD68	SCGB3A2	MARCO	0.0129813007661071	0	SCGB3A2_MARCO	SCGB3A2 - MARCO	UGRP1	Secreted Signaling	PMID: 12847263
GE1	Fibroblast_06_Alveolar_MS4A7	SCGB3A2	MARCO	0.0175391409821072	0	SCGB3A2_MARCO	SCGB3A2 - MARCO	UGRP1	Secreted Signaling	PMID: 12847263
GE1	Macrophage_01_LGMN	SCGB3A2	MARCO	0.017403189928093	0	SCGB3A2_MARCO	SCGB3A2 - MARCO	UGRP1	Secreted Signaling	PMID: 12847263
GE1	Macrophage_03_MARCO	SCGB3A2	MARCO	0.107658267615932	0	SCGB3A2_MARCO	SCGB3A2 - MARCO	UGRP1	Secreted Signaling	PMID: 12847263
GE1	Macrophage_05_CSTB	SCGB3A2	MARCO	0.0193372839269107	0	SCGB3A2_MARCO	SCGB3A2 - MARCO	UGRP1	Secreted Signaling	PMID: 12847263
GE1	Mast_02_CHIT1	SCGB3A2	MARCO	0.0564821087226589	0	SCGB3A2_MARCO	SCGB3A2 - MARCO	UGRP1	Secreted Signaling	PMID: 12847263

[truncated: 3 more sheets: Sheet11, Sheet12, Sheet13]
